# Supplementary material for: Identification of non-model mammal species using the MinION DNA sequencer from Oxford Nanopore
Source: PeerJ. 2024 Sep 25;12:e17887. doi: 10.7717/peerj.17887 (PMC11438440; doi:10.7717/peerj.17887)
Supplement: Supplemental Information 2 [file peerj-12-17887-s002.xlsx]

## Sheet: Metazoa-level
DC-BLAST results for Metazoa-level analyses.
JFD1578
subject.tax.id	Count	query.acc.ver	subject.acc.ver	X..identity	Average.X..identity	X..identity.range	evalue	Average.evalue	evalue.range	alignment.length	Average.alignment.length	alignment.length.range	query.length	Average.query.length	query.length.range	subject.length	Average.subject.length	subject.length.range	class	order	family	genus	species
124752	8	5a67cf7c-3059-45c0-8938-f34e19f80bdb	MF143480.1	93.286	93.4213	91.741|99.065	0	5.55e-50	0|4.44e-49	1534	2301.88	107|5906	1538	4623.88	199|9860	17074	13036.2	706|17074	Mammalia	Chiroptera	Vespertilionidae	Myotis	Myotis riparius
124752	8	e83e1a5b-e499-4ae7-947d-df19c563c9f5	JX130515.1	93.201	93.4213	91.741|99.065	0	5.55e-50	0|4.44e-49	1162	2301.88	107|5906	9007	4623.88	199|9860	1140	13036.2	706|17074	Mammalia	Chiroptera	Vespertilionidae	Myotis	Myotis riparius
124752	8	afe2cf8d-aa7c-4c70-afe4-ee113239fd14	MF143480.1	92.431	93.4213	91.741|99.065	0	5.55e-50	0|4.44e-49	5906	2301.88	107|5906	8836	4623.88	199|9860	17074	13036.2	706|17074	Mammalia	Chiroptera	Vespertilionidae	Myotis	Myotis riparius
124752	8	b360a7a5-3ee6-4934-823f-530b0e5204ba	MF143480.1	92.249	93.4213	91.741|99.065	0	5.55e-50	0|4.44e-49	5341	2301.88	107|5906	9860	4623.88	199|9860	17074	13036.2	706|17074	Mammalia	Chiroptera	Vespertilionidae	Myotis	Myotis riparius
124752	8	f9202bb7-5353-42eb-bd27-9648d1cdce2b	MF143480.1	91.876	93.4213	91.741|99.065	0	5.55e-50	0|4.44e-49	874	2301.88	107|5906	1487	4623.88	199|9860	17074	13036.2	706|17074	Mammalia	Chiroptera	Vespertilionidae	Myotis	Myotis riparius
124752	8	c6783c02-2ca5-47db-a1a9-d5e937e08ce1	MF143480.1	91.741	93.4213	91.741|99.065	0	5.55e-50	0|4.44e-49	3136	2301.88	107|5906	5670	4623.88	199|9860	17074	13036.2	706|17074	Mammalia	Chiroptera	Vespertilionidae	Myotis	Myotis riparius
159322	3	b2ca98ca-8ebd-4a7b-9233-3198765fc5b9	MF143471.1	90.602	90.294	90.098|90.602	0	3.5e-78	0|1.05e-77	798	596.667	275|798	1959	1549.33	1246|1959	16552	16724	16552|16810	Mammalia	Chiroptera	Vespertilionidae	Myotis	Myotis albescens
159322	3	40ce3caf-9cbd-4116-a77c-6ec3f0cb2f77	MF143475.1	90.098	90.294	90.098|90.602	0	3.5e-78	0|1.05e-77	717	596.667	275|798	1246	1549.33	1246|1959	16810	16724	16552|16810	Mammalia	Chiroptera	Vespertilionidae	Myotis	Myotis albescens
124752	8	ed704ee9-04bc-4e91-8ba1-c4b384c260a7	MF143480.1	93.521	93.4213	91.741|99.065	4e-139	5.55e-50	0|4.44e-49	355	2301.88	107|5906	394	4623.88	199|9860	17074	13036.2	706|17074	Mammalia	Chiroptera	Vespertilionidae	Myotis	Myotis riparius
159322	3	c8c154e4-3894-426e-937a-1063040a9356	MF143475.1	90.182	90.294	90.098|90.602	1.05e-77	3.5e-78	0|1.05e-77	275	596.667	275|798	1443	1549.33	1246|1959	16810	16724	16552|16810	Mammalia	Chiroptera	Vespertilionidae	Myotis	Myotis albescens
124752	8	21212359-ce9a-4b6b-91e9-373ad89a5e42	MW089486.1	99.065	93.4213	91.741|99.065	4.44e-49	5.55e-50	0|4.44e-49	107	2301.88	107|5906	199	4623.88	199|9860	706	13036.2	706|17074	Mammalia	Chiroptera	Vespertilionidae	Myotis	Myotis riparius
34712	1	98c28a9b-8a8b-412e-803a-da832d05febe	BK012798.1	92.941	92.941	92.941|92.941	2.1e-20	2.1e-20	2.1e-20|2.1e-20	85	85	85|85	5709	5709	5709|5709	5396	5396	5396|5396	Insecta	Hymenoptera	Formicidae	Mycocepurus	Mycocepurus smithii
2025911	1	9c64b8ef-de57-4103-b1f6-229f1ea08c82	KX755299.1	91.304	91.304	91.304|91.304	1e-13	1e-13	1e-13|1e-13	69	69	69|69	8657	8657	8657|8657	16756	16756	16756|16756	Mammalia	Rodentia	Echimyidae	Proechimys	Proechimys echinothrix
6997	1	c540cfb0-2f48-432f-bae9-49f3695c0500	MZ440654.1	91.803	91.803	91.803|91.803	3.22e-12	3.22e-12	3.22e-12|3.22e-12	61	61	61|61	4703	4703	4703|4703	16071	16071	16071|16071	Insecta	Orthoptera	Gryllidae	Acheta	Acheta domesticus
2930061	1	699a1bc6-751e-41d1-9d8e-577b57a3d684	OL677871.1	94.545	94.545	94.545|94.545	1.01e-11	1.01e-11	1.01e-11|1.01e-11	55	55	55|55	14660	14660	14660|14660	15852	15852	15852|15852	Insecta	Hemiptera	Cicadellidae	Atkinsoniella	Atkinsoniella warpa
2669317	1	dc273e2d-0676-43f7-adc4-280198fed499	MT295305.2	91.667	91.667	91.667|91.667	2.21e-09	2.21e-09	2.21e-09|2.21e-09	60	60	60|60	14017	14017	14017|14017	16187	16187	16187|16187	Insecta	Hymenoptera	Tenthredinidae	Cladiucha	Cladiucha punctata
362906	1	e0caeb67-fa37-44c2-8396-81629a309f2d	MN912823.1	93.023	93.023	93.023|93.023	7.57e-07	7.57e-07	7.57e-07|7.57e-07	43	43	43|43	1387	1387	1387|1387	15348	15348	15348|15348	Insecta	Diptera	Syrphidae	Eristalis	Eristalis cerealis
JFD1615
subject.tax.id	Count	query.acc.ver	subject.acc.ver	X..identity	Average.X..identity	X..identity.range	evalue	Average.evalue	evalue.range	alignment.length	Average.alignment.length	alignment.length.range	query.length	Average.query.length	query.length.range	subject.length	Average.subject.length	subject.length.range	class	order	family	genus	species
530178	6	3ee73814-a47a-473e-884b-b5d83ff1d1f9	MZ364418.1	96.39	94.2007	91.501|96.39	0	8.01667e-12	0|4.81e-11	554	387.5	48|655	773	3075.5	773|11313	658	712.167	384|1325	Mammalia	Rodentia	Cricetidae	Nephelomys	Nephelomys albigularis
1734924	21	f72885e0-ad3c-482c-bf11-f4b1e1dcfa20	MN547688.1	95.152	92.845	90.126|95.152	0	1.74762e-75	0|3.67e-74	1155	687.238	216|1167	6928	3471.38	387|16151	1149	830.714	592|1149	Mammalia	Rodentia	Cricetidae	Nephelomys	Nephelomys devius
1734924	21	924db275-3e96-4408-98f9-154af20af670	MN547688.1	95.142	92.845	90.126|95.152	0	1.74762e-75	0|3.67e-74	988	687.238	216|1167	4287	3471.38	387|16151	1149	830.714	592|1149	Mammalia	Rodentia	Cricetidae	Nephelomys	Nephelomys devius
1734924	21	e00ce4c9-2a53-4059-be4d-4d66f2882655	MN547688.1	94.212	92.845	90.126|95.152	0	1.74762e-75	0|3.67e-74	812	687.238	216|1167	7151	3471.38	387|16151	1149	830.714	592|1149	Mammalia	Rodentia	Cricetidae	Nephelomys	Nephelomys devius
1734924	21	f6bf4db3-57c8-4b1d-9eda-8a5141c62382	MN547688.1	94.041	92.845	90.126|95.152	0	1.74762e-75	0|3.67e-74	537	687.238	216|1167	3461	3471.38	387|16151	1149	830.714	592|1149	Mammalia	Rodentia	Cricetidae	Nephelomys	Nephelomys devius
1734924	21	84ef6bba-2d2e-4c03-bb96-f952924466c3	MN547688.1	93.809	92.845	90.126|95.152	0	1.74762e-75	0|3.67e-74	1163	687.238	216|1167	16151	3471.38	387|16151	1149	830.714	592|1149	Mammalia	Rodentia	Cricetidae	Nephelomys	Nephelomys devius
1734924	21	24767208-0c7d-4884-bbc7-e7c8fb5147dd	MN547688.1	93.46	92.845	90.126|95.152	0	1.74762e-75	0|3.67e-74	1162	687.238	216|1167	3946	3471.38	387|16151	1149	830.714	592|1149	Mammalia	Rodentia	Cricetidae	Nephelomys	Nephelomys devius
2964401	1	63fb5581-6bd8-4453-a682-24fd21bc755d	MZ364464.1	93.455	93.455	93.455|93.455	0	0	0|0	550	550	550|550	2892	2892	2892|2892	544	544	544|544	Mammalia	Rodentia	Cricetidae	Nephelomys	Nephelomys childi
1734924	21	511eed02-7f29-4032-b3c7-50015f495861	MN547700.1	93.402	92.845	90.126|95.152	0	1.74762e-75	0|3.67e-74	1167	687.238	216|1167	13987	3471.38	387|16151	1149	830.714	592|1149	Mammalia	Rodentia	Cricetidae	Nephelomys	Nephelomys devius
530178	6	47ed31de-20db-4117-bbfd-ce36d1e1e15b	MZ364418.1	92.977	94.2007	91.501|96.39	0	8.01667e-12	0|4.81e-11	655	387.5	48|655	2527	3075.5	773|11313	658	712.167	384|1325	Mammalia	Rodentia	Cricetidae	Nephelomys	Nephelomys albigularis
1734924	21	865ab8f7-e911-4e21-be61-8cc5a43818a7	KP778620.1	92.842	92.845	90.126|95.152	0	1.74762e-75	0|3.67e-74	475	687.238	216|1167	1104	3471.38	387|16151	592	830.714	592|1149	Mammalia	Rodentia	Cricetidae	Nephelomys	Nephelomys devius
1734924	21	5fb1558b-0ffc-47d6-9a5d-8422a65217d1	MN547688.1	92.564	92.845	90.126|95.152	0	1.74762e-75	0|3.67e-74	659	687.238	216|1167	685	3471.38	387|16151	1149	830.714	592|1149	Mammalia	Rodentia	Cricetidae	Nephelomys	Nephelomys devius
1734924	21	0af9f6ac-bbc9-4dd5-9b53-47c2e4b0dbd8	KP778620.1	92.549	92.845	90.126|95.152	0	1.74762e-75	0|3.67e-74	510	687.238	216|1167	1138	3471.38	387|16151	592	830.714	592|1149	Mammalia	Rodentia	Cricetidae	Nephelomys	Nephelomys devius
1734924	21	5ce073ec-8d8b-4cfa-811a-5bb2cb9d2c03	KP778620.1	92.545	92.845	90.126|95.152	0	1.74762e-75	0|3.67e-74	550	687.238	216|1167	1194	3471.38	387|16151	592	830.714	592|1149	Mammalia	Rodentia	Cricetidae	Nephelomys	Nephelomys devius
1734924	21	688aaddb-8e1e-41c5-992c-78d6a13fb6ad	KP778620.1	92.224	92.845	90.126|95.152	0	1.74762e-75	0|3.67e-74	553	687.238	216|1167	1063	3471.38	387|16151	592	830.714	592|1149	Mammalia	Rodentia	Cricetidae	Nephelomys	Nephelomys devius
1734924	21	06217830-5a99-4ce4-8950-96ed901e7c76	KP778654.1	92.157	92.845	90.126|95.152	0	1.74762e-75	0|3.67e-74	510	687.238	216|1167	1046	3471.38	387|16151	592	830.714	592|1149	Mammalia	Rodentia	Cricetidae	Nephelomys	Nephelomys devius
1734924	21	3e57e243-6dc3-4a5d-baf9-be3331de440d	KP778620.1	92.058	92.845	90.126|95.152	0	1.74762e-75	0|3.67e-74	554	687.238	216|1167	1221	3471.38	387|16151	592	830.714	592|1149	Mammalia	Rodentia	Cricetidae	Nephelomys	Nephelomys devius
1734924	21	9d8159c9-c6d3-403b-ac29-fd8512894561	MN547688.1	91.701	92.845	90.126|95.152	0	1.74762e-75	0|3.67e-74	976	687.238	216|1167	4225	3471.38	387|16151	1149	830.714	592|1149	Mammalia	Rodentia	Cricetidae	Nephelomys	Nephelomys devius
1734924	21	9b2d595a-c9b8-4d6f-83be-817e49f30596	KP778620.1	90.96	92.845	90.126|95.152	1.13e-180	1.74762e-75	0|3.67e-74	531	687.238	216|1167	927	3471.38	387|16151	592	830.714	592|1149	Mammalia	Rodentia	Cricetidae	Nephelomys	Nephelomys devius
1734924	21	44f53a99-a41d-4bc2-9a5b-a5cdc44661c3	KP778620.1	90.126	92.845	90.126|95.152	3.22e-178	1.74762e-75	0|3.67e-74	557	687.238	216|1167	1142	3471.38	387|16151	592	830.714	592|1149	Mammalia	Rodentia	Cricetidae	Nephelomys	Nephelomys devius
1734924	21	dbdb1cb4-8c65-4ea6-b307-83e5a9c7b20a	KP778654.1	94.377	92.845	90.126|95.152	1.26e-170	1.74762e-75	0|3.67e-74	409	687.238	216|1167	940	3471.38	387|16151	592	830.714	592|1149	Mammalia	Rodentia	Cricetidae	Nephelomys	Nephelomys devius
1734924	21	dfa32d51-c20e-442a-be47-b2aead04572a	KP778620.1	90.149	92.845	90.126|95.152	1.41e-170	1.74762e-75	0|3.67e-74	538	687.238	216|1167	1054	3471.38	387|16151	592	830.714	592|1149	Mammalia	Rodentia	Cricetidae	Nephelomys	Nephelomys devius
1734924	21	152c7bd8-52d9-4aef-8889-1b0dc0d28554	KP778481.1	94.146	92.845	90.126|95.152	4.48e-170	1.74762e-75	0|3.67e-74	410	687.238	216|1167	862	3471.38	387|16151	592	830.714	592|1149	Mammalia	Rodentia	Cricetidae	Nephelomys	Nephelomys devius
530178	6	33cf6bd1-ec64-4508-9278-4c7fb5a8719e	JF693848.1	92.784	94.2007	91.501|96.39	7.26e-149	8.01667e-12	0|4.81e-11	388	387.5	48|655	11313	3075.5	773|11313	384	712.167	384|1325	Mammalia	Rodentia	Cricetidae	Nephelomys	Nephelomys albigularis
530178	6	e75cc1ad-cccf-4d7e-8904-71416b7c5baa	MZ364418.1	95.719	94.2007	91.501|96.39	5.46e-145	8.01667e-12	0|4.81e-11	327	387.5	48|655	1618	3075.5	773|11313	658	712.167	384|1325	Mammalia	Rodentia	Cricetidae	Nephelomys	Nephelomys albigularis
2904038	1	e1c7ab94-7b80-4374-96b1-ad15d03f4a01	MZ736555.1	91.033	91.033	91.033|91.033	1.27e-115	0	1.27e-115|1.27e-115	368	368	368|368	16670	16670	16670|16670	801	801	801|801	Mammalia	Rodentia	Cricetidae	Nephelomys	Nephelomys ricardopalmai
530178	6	cff063ec-3ae2-4f2d-9c82-bded2f55de75	U83820.1	91.501	94.2007	91.501|96.39	9.33e-110	8.01667e-12	0|4.81e-11	353	387.5	48|655	1017	3075.5	773|11313	1325	712.167	384|1325	Mammalia	Rodentia	Cricetidae	Nephelomys	Nephelomys albigularis
530172	1	75b4cc56-9a7c-4f62-8abf-b6d6140e73a6	KP778473.1	91.9	91.9	91.9|91.9	1.53e-105	0	1.53e-105|1.53e-105	321	321	321|321	1221	1221	1221|1221	610	610	610|610	Mammalia	Rodentia	Cricetidae	Handleyomys	Handleyomys rostratus
1734924	21	c84c5c96-7916-4521-a243-2cd4ef98c2e6	KP778481.1	92.13	92.845	90.126|95.152	3.67e-74	1.74762e-75	0|3.67e-74	216	687.238	216|1167	387	3471.38	387|16151	592	830.714	592|1149	Mammalia	Rodentia	Cricetidae	Nephelomys	Nephelomys devius
2665882	1	e63fb68c-7585-4e55-a3cd-a7ae04dd85ec	MN653121.1	95.266	95.266	95.266|95.266	2.22e-65	2.22e-65	2.22e-65|2.22e-65	169	169	169|169	4670	4670	4670|4670	705	705	705|705	Polychaeta	Phyllodocida	Polynoidae	NA	Polynoidae sp. polynoid2 ST-2019
530184	1	881b3b01-48f3-46f2-9fe7-c33c3910d144	MZ364477.1	98.113	98.113	98.113|98.113	5.42e-45	5.42e-45	5.42e-45|5.42e-45	106	106	106|106	641	641	641|641	546	546	546|546	Mammalia	Rodentia	Cricetidae	Transandinomys	Transandinomys talamancae
89098	3	02af005a-5838-4eeb-b710-334f8a509540	OL685394.1	91.304	91.916	90|94.444	3.16e-38	2.40667e-07	3.16e-38|7.22e-07	138	84	54|138	316	834.667	316|1325	16358	16358	16358|16358	Mammalia	Rodentia	Cricetidae	Holochilus	Holochilus sciureus
322708	1	fea2d9d7-7550-4bd0-aa8e-0e4073e4aa6f	DQ138954.1	93.162	93.162	93.162|93.162	1.52e-34	1.52e-34	1.52e-34|1.52e-34	117	117	117|117	426	426	426|426	1494	1494	1494|1494	Mammalia	Rodentia	Cricetidae	Peromyscus	Peromyscus perfulvus
42415	1	cb10d364-8d87-41a8-a5c6-9c8fdfbf4329	KY707311.1	91.27	91.27	91.27|91.27	2.77e-30	2.77e-30	2.77e-30|2.77e-30	126	126	126|126	8266	8266	8266|8266	16394	16394	16394|16394	Mammalia	Rodentia	Cricetidae	Sigmodon	Sigmodon hispidus
230081	1	bc10a46d-8a5e-49ec-a136-b32264d07505	KY707310.1	93.407	93.407	93.407|93.407	1.07e-24	1.07e-24	1.07e-24|1.07e-24	91	91	91|91	282	282	282|282	16776	16776	16776|16776	Mammalia	Rodentia	Cricetidae	Neotomodon	Neotomodon alstoni
105149	1	47c9f2ab-7ba0-4a0a-b48d-75a8d14878e8	ON528109.1	94.048	94.048	94.048|94.048	3.26e-24	3.26e-24	3.26e-24|3.26e-24	84	84	84|84	814	814	814|814	16453	16453	16453|16453	Mammalia	Rodentia	Cricetidae	Neotoma	Neotoma mexicana
89150	1	9a94a1da-c789-42bc-bdac-7243ba910978	KY707307.1	92.683	92.683	92.683|92.683	2.32e-19	2.32e-19	2.32e-19|2.32e-19	82	82	82|82	1082	1082	1082|1082	16606	16606	16606|16606	Mammalia	Rodentia	Cricetidae	Reithrodontomys	Reithrodontomys mexicanus
89098	3	e5876464-bf25-4e31-8774-cbd79a411720	OL685394.1	94.444	91.916	90|94.444	5.78e-13	2.40667e-07	3.16e-38|7.22e-07	54	84	54|138	863	834.667	316|1325	16358	16358	16358|16358	Mammalia	Rodentia	Cricetidae	Holochilus	Holochilus sciureus
2136035	1	50249fa2-9b3b-4bdb-b745-c76f8adcdbc5	MG450794.1	94.444	94.444	94.444|94.444	7.28e-12	7.28e-12	7.28e-12|7.28e-12	54	54	54|54	720	720	720|720	16461	16461	16461|16461	Mammalia	Rodentia	Sciuridae	Cynomys	Cynomys gunnisoni
530178	6	8080b5bb-56a6-4401-9cd6-648e5e9199ef	KP778483.1	95.833	94.2007	91.501|96.39	4.81e-11	8.01667e-12	0|4.81e-11	48	387.5	48|655	1205	3075.5	773|11313	590	712.167	384|1325	Mammalia	Rodentia	Cricetidae	Nephelomys	Nephelomys albigularis
61157	1	19f4a35c-b16c-424a-bce9-a5240558c9b3	NC_053801.1	97.674	97.674	97.674|97.674	4.22e-10	4.22e-10	4.22e-10|4.22e-10	43	43	43|43	10409	10409	10409|10409	16272	16272	16272|16272	Mammalia	Rodentia	Muridae	Arvicanthis	Arvicanthis somalicus
9606	1	cfc930ea-b10c-4bb6-ba1d-53ddfa53130e	FJ854353.1	90.769	90.769	90.769|90.769	9.77e-08	9.77e-08	9.77e-08|9.77e-08	65	65	65|65	10459	10459	10459|10459	701	701	701|701	Mammalia	Primates	Hominidae	Homo	Homo sapiens
559683	1	8a0b6630-1e89-4e07-b95c-9c74487e43ed	OP528688.1	97.368	97.368	97.368|97.368	1.34e-07	1.34e-07	1.34e-07|1.34e-07	38	38	38|38	3703	3703	3703|3703	15713	15713	15713|15713	Insecta	Diptera	Muscidae	Hebecnema	Hebecnema fumosa
89098	3	31bd9381-b75b-48ea-b7e2-0f31adf8f5aa	OL685394.1	90	91.916	90|94.444	7.22e-07	2.40667e-07	3.16e-38|7.22e-07	60	84	54|138	1325	834.667	316|1325	16358	16358	16358|16358	Mammalia	Rodentia	Cricetidae	Holochilus	Holochilus sciureus
JFD1579
subject.tax.id	Count	query.acc.ver	subject.acc.ver	X..identity	Average.X..identity	X..identity.range	evalue	Average.evalue	evalue.range	alignment.length	Average.alignment.length	alignment.length.range	query.length	Average.query.length	query.length.range	subject.length	Average.subject.length	subject.length.range	class	order	family	genus	species
258919	8	db317b25-53f2-4d4a-9eef-c2b914c011f7	OP345311.1	91.812	91.674	90.022|95.482	0	1.85e-15	0|1.48e-14	6778	2235.5	75|6778	6705	3371.75	315|7340	16799	15022.1	2587|16800	Mammalia	Chiroptera	Vespertilionidae	Histiotus	Histiotus macrotus
258919	8	b27f693f-8cc2-44b0-91ff-ed5feba8ce71	OP345336.1	91.535	91.674	90.022|95.482	0	1.85e-15	0|1.48e-14	4111	2235.5	75|6778	4539	3371.75	315|7340	16800	15022.1	2587|16800	Mammalia	Chiroptera	Vespertilionidae	Histiotus	Histiotus macrotus
258919	8	3834b819-195d-4f55-a230-e9b05a207a59	OP345298.1	90.691	91.674	90.022|95.482	0	1.85e-15	0|1.48e-14	666	2235.5	75|6778	688	3371.75	315|7340	16798	15022.1	2587|16800	Mammalia	Chiroptera	Vespertilionidae	Histiotus	Histiotus macrotus
258919	8	417dbeab-0cfd-40da-8d1f-a2ebe07951b6	OP345311.1	90.022	91.674	90.022|95.482	0	1.85e-15	0|1.48e-14	5382	2235.5	75|6778	7340	3371.75	315|7340	16799	15022.1	2587|16800	Mammalia	Chiroptera	Vespertilionidae	Histiotus	Histiotus macrotus
258919	8	dfe0c2ef-a60b-45b3-a213-61d94942b4e7	AY495472.1	95.482	91.674	90.022|95.482	1.3e-148	1.85e-15	0|1.48e-14	332	2235.5	75|6778	363	3371.75	315|7340	2587	15022.1	2587|16800	Mammalia	Chiroptera	Vespertilionidae	Histiotus	Histiotus macrotus
2764696	1	daeb63bb-17ee-438d-8862-d85f3bbe702f	MT113462.1	94.464	94.464	94.464|94.464	1.47e-118	0	1.47e-118|1.47e-118	289	289	289|289	312	312	312|312	980	980	980|980	Mammalia	Chiroptera	Vespertilionidae	Histiotus	Histiotus humboldti
1161940	4	5a2e4e7c-ebcb-4bc6-9269-1d6b4c20a498	OP345313.1	92.982	92.2567	90.625|94.694	1.52e-105	3.975e-32	1.52e-105|1.59e-31	285	226.5	128|285	326	2054	293|7220	16814	16814	16814|16814	Mammalia	Chiroptera	Vespertilionidae	Histiotus	Histiotus montanus
1161940	4	12bb3124-d63b-4137-9c4d-0533b7be732c	OP345313.1	94.694	92.2567	90.625|94.694	1.28e-96	3.975e-32	1.52e-105|1.59e-31	245	226.5	128|285	377	2054	293|7220	16814	16814	16814|16814	Mammalia	Chiroptera	Vespertilionidae	Histiotus	Histiotus montanus
258919	8	eea76667-7cc2-4572-8bb9-1c7c641196c4	OP345298.1	90.975	91.674	90.022|95.482	1.04e-83	1.85e-15	0|1.48e-14	277	2235.5	75|6778	315	3371.75	315|7340	16798	15022.1	2587|16800	Mammalia	Chiroptera	Vespertilionidae	Histiotus	Histiotus macrotus
258919	8	ad3d9f56-292d-492c-a743-a1129677b608	OP345335.1	90.875	91.674	90.022|95.482	5.21e-83	1.85e-15	0|1.48e-14	263	2235.5	75|6778	5729	3371.75	315|7340	16798	15022.1	2587|16800	Mammalia	Chiroptera	Vespertilionidae	Histiotus	Histiotus macrotus
1161940	4	ace50fae-2d83-48c0-8af6-552f0463ae51	OP345313.1	90.726	92.2567	90.625|94.694	2.45e-71	3.975e-32	1.52e-105|1.59e-31	248	226.5	128|285	293	2054	293|7220	16814	16814	16814|16814	Mammalia	Chiroptera	Vespertilionidae	Histiotus	Histiotus montanus
1161940	4	02865be2-c32a-4841-afcb-d7fa3254b4d9	OP345313.1	90.625	92.2567	90.625|94.694	1.59e-31	3.975e-32	1.52e-105|1.59e-31	128	226.5	128|285	7220	2054	293|7220	16814	16814	16814|16814	Mammalia	Chiroptera	Vespertilionidae	Histiotus	Histiotus montanus
1030430	1	4dd5a507-dd97-4ebb-bfe2-00dc398d6dba	KU167550.1	95.946	95.946	95.946|95.946	2.26e-23	2.26e-23	2.26e-23|2.26e-23	74	74	74|74	5516	5516	5516|5516	15262	15262	15262|15262	Insecta	Hemiptera	Cicadellidae	Bothrogonia	Bothrogonia ferruginea
258919	8	f6b2750e-c11e-4a46-8508-63895ba9b5e0	OP345298.1	92	91.674	90.022|95.482	1.48e-14	1.85e-15	0|1.48e-14	75	2235.5	75|6778	1295	3371.75	315|7340	16798	15022.1	2587|16800	Mammalia	Chiroptera	Vespertilionidae	Histiotus	Histiotus macrotus
2030382	1	8c855a05-b251-41c3-90aa-e4ce58a28744	MF410990.1	97.436	97.436	97.436|97.436	1.06e-08	1.06e-08	1.06e-08|1.06e-08	39	39	39|39	1154	1154	1154|1154	16123	16123	16123|16123	Insecta	Diptera	Dolichopodidae	NA	Dolichopodidae sp. LC-2017
463830	1	7bd95202-f076-4ca5-89ec-2ed86bbce04d	MT635723.1	100	100	100|100	3.7e-06	3.7e-06	3.7e-06|3.7e-06	32	32	32|32	6713	6713	6713|6713	15375	15375	15375|15375	Insecta	Lepidoptera	Tortricidae	Thaumatotibia	Thaumatotibia leucotreta
2873975	1	a6e4b781-38f8-4460-b8ab-ae992392f0df	MW662667.1	93.023	93.023	93.023|93.023	5.8e-06	5.8e-06	5.8e-06|5.8e-06	43	43	43|43	10496	10496	10496|10496	16028	16028	16028|16028	Insecta	Hemiptera	Fulgoridae	Pyrops	Pyrops spinolae
30193	2	6310238d-2059-476b-9196-0107c79141af	KT164681.1	97.059	97.059	97.059|97.059	8.49e-06	8.55e-06	8.49e-06|8.61e-06	34	34	34|34	1031	1038.5	1031|1046	10776	10776	10776|10776	Insecta	Hymenoptera	Apidae	Bombus	Bombus lucorum
30193	2	100d5648-7e52-47a9-82c2-e61ead6f6b51	KT164681.1	97.059	97.059	97.059|97.059	8.61e-06	8.55e-06	8.49e-06|8.61e-06	34	34	34|34	1046	1038.5	1031|1046	10776	10776	10776|10776	Insecta	Hymenoptera	Apidae	Bombus	Bombus lucorum
JFD1588
subject.tax.id	Count	query.acc.ver	subject.acc.ver	X..identity	Average.X..identity	X..identity.range	evalue	Average.evalue	evalue.range	alignment.length	Average.alignment.length	alignment.length.range	query.length	Average.query.length	query.length.range	subject.length	Average.subject.length	subject.length.range	class	order	family	genus	species
530171	10	c383aa32-f54c-4d06-b9d8-2e1206133a8f	KP778263.1	96.197	92.7066	90.442|96.197	0	3.4e-75	0|3.4e-74	1157	553.3	185|1157	16376	3566.7	360|16376	1143	865.9	549|1143	Mammalia	Rodentia	Cricetidae	Handleyomys	Handleyomys alfaroi
530171	10	88741345-ab7d-4a04-9318-392c057fc06a	MZ364443.1	92.487	92.7066	90.442|96.197	0	3.4e-75	0|3.4e-74	559	553.3	185|1157	5385	3566.7	360|16376	549	865.9	549|1143	Mammalia	Rodentia	Cricetidae	Handleyomys	Handleyomys alfaroi
530171	10	b3a76666-66d2-462b-866b-5f8971d19313	KP778263.1	91.766	92.7066	90.442|96.197	0	3.4e-75	0|3.4e-74	668	553.3	185|1157	701	3566.7	360|16376	1143	865.9	549|1143	Mammalia	Rodentia	Cricetidae	Handleyomys	Handleyomys alfaroi
530171	10	ef8859ca-3813-4a12-a54e-03b449f3fb14	KP778632.1	91.418	92.7066	90.442|96.197	0	3.4e-75	0|3.4e-74	536	553.3	185|1157	664	3566.7	360|16376	620	865.9	549|1143	Mammalia	Rodentia	Cricetidae	Handleyomys	Handleyomys alfaroi
530171	10	9aba3bea-426b-43f7-83ea-342386ce044e	MZ364443.1	91.327	92.7066	90.442|96.197	0	3.4e-75	0|3.4e-74	565	553.3	185|1157	4836	3566.7	360|16376	549	865.9	549|1143	Mammalia	Rodentia	Cricetidae	Handleyomys	Handleyomys alfaroi
530171	10	f860532a-2656-4a82-94a0-5986ecb151b4	KP778590.1	91.29	92.7066	90.442|96.197	0	3.4e-75	0|3.4e-74	597	553.3	185|1157	1391	3566.7	360|16376	613	865.9	549|1143	Mammalia	Rodentia	Cricetidae	Handleyomys	Handleyomys alfaroi
530171	10	6c76430d-b170-4ca9-b240-c4e1a7859040	KP778590.1	90.442	92.7066	90.442|96.197	0	3.4e-75	0|3.4e-74	565	553.3	185|1157	1838	3566.7	360|16376	613	865.9	549|1143	Mammalia	Rodentia	Cricetidae	Handleyomys	Handleyomys alfaroi
530171	10	05eee468-a778-4391-9ef2-6fd7b1546dae	KP778263.1	92.031	92.7066	90.442|96.197	5.38e-145	3.4e-75	0|3.4e-74	389	553.3	185|1157	425	3566.7	360|16376	1143	865.9	549|1143	Mammalia	Rodentia	Cricetidae	Handleyomys	Handleyomys alfaroi
530171	10	2c629c6d-9d76-433b-822c-34817e57df39	KP778238.1	95.513	92.7066	90.442|96.197	8.14e-133	3.4e-75	0|3.4e-74	312	553.3	185|1157	3691	3566.7	360|16376	1143	865.9	549|1143	Mammalia	Rodentia	Cricetidae	Handleyomys	Handleyomys alfaroi
70284	1	a53c9372-9693-4c1f-9ecd-17b67673f954	MN058077.1	94.071	94.071	94.071|94.071	4.22e-100	4e-100	4.22e-100|4.22e-100	253	253	253|253	1616	1616	1616|1616	16331	16331	16331|16331	Mammalia	Rodentia	Cricetidae	Microtus	Microtus cabrerae
530171	10	6b8782ec-8be3-40c4-8a13-1a3ee25cc00d	KP778263.1	94.595	92.7066	90.442|96.197	3.4e-74	3.4e-75	0|3.4e-74	185	553.3	185|1157	360	3566.7	360|16376	1143	865.9	549|1143	Mammalia	Rodentia	Cricetidae	Handleyomys	Handleyomys alfaroi
218834	1	57fa2c60-1a00-4225-8de7-c9304958f8ca	AY863422.1	92.958	92.958	92.958|92.958	5.11e-74	5.11e-74	5.11e-74|5.11e-74	213	213	213|213	530	530	530|530	1182	1182	1182|1182	Mammalia	Rodentia	Cricetidae	Pseudoryzomys	Pseudoryzomys simplex
10120	1	d9a61d07-6f9d-4ba3-9d86-b5ed763e00b6	NC_014871.1	91.457	91.457	91.457|91.457	6.64e-58	6.64e-58	6.64e-58|6.64e-58	199	199	199|199	770	770	770|770	16309	16309	16309|16309	Mammalia	Rodentia	Muridae	Rattus	Rattus sordidus
175522	1	d75bf3a9-bc80-4d95-bd2d-1682640c1113	ON165286.1	93.464	93.464	93.464|93.464	7.56e-49	7.56e-49	7.56e-49|7.56e-49	153	153	153|153	1197	1197	1197|1197	16362	16362	16362|16362	Mammalia	Rodentia	Cricetidae	Lagurus	Lagurus lagurus
85952	1	1dd990d9-50d8-47b8-87fe-dafb48ddebc8	MN792931.1	92.308	92.308	92.308|92.308	2.95e-20	2.95e-20	2.95e-20|2.95e-20	91	91	91|91	7997	7997	7997|7997	16342	16342	16342|16342	Mammalia	Rodentia	Cricetidae	Dicrostonyx	Dicrostonyx torquatus
218826	1	d889d06b-4721-46b5-92e9-8fa7342769f0	MF696155.1	91.463	91.463	91.463|91.463	1.5e-19	1.5e-19	1.5e-19|1.5e-19	82	82	82|82	198	198	198|198	16314	16314	16314|16314	Mammalia	Rodentia	Cricetidae	Oligoryzomys	Oligoryzomys stramineus
1781086	1	cf5a1270-2bf6-45ec-ab0c-e2406a933ea9	KT718480.1	90.123	90.123	90.123|90.123	6.12e-13	6.12e-13	6.12e-13|6.12e-13	81	81	81|81	3495	3495	3495|3495	591	591	591|591	Actinopteri	Gadiformes	Bregmacerotidae	NA	Bregmacerotidae sp. ASIZP0078881
94196	1	4b2fcfbb-e40f-4393-bf6f-b8ce3ab34be6	KX891745.1	94.545	94.545	94.545|94.545	5.87e-11	5.87e-11	5.87e-11|5.87e-11	55	55	55|55	5650	5650	5650|5650	16586	16586	16586|16586	Mammalia	Carnivora	Viverridae	Viverricula	Viverricula indica
377587	1	0ac2b3d0-a7aa-4cf7-b1f4-d951b123ba48	MK659827.1	100	100	100|100	5.29e-07	5.29e-07	5.29e-07|5.29e-07	33	33	33|33	3741	3741	3741|3741	16144	16144	16144|16144	Insecta	Diptera	Drosophilidae	Drosophila	Drosophila mojavensis
1656229	1	6614dedb-b81b-4091-9b12-c2e4ea709f95	KR815450.1	90	90	90|90	1.76e-06	1.76e-06	1.76e-06|1.76e-06	50	50	50|50	837	837	837|837	13766	13766	13766|13766	Chromadorea	Rhabditida	Rhabditidae	Litoditis	Litoditis aff. marina PmI
218793	1	c4b2b6c1-7ae1-4029-bf9d-3575a28a61fc	MH939287.1	90.566	90.566	90.566|90.566	4.59e-06	4.59e-06	4.59e-06|4.59e-06	53	53	53|53	2149	2149	2149|2149	16309	16309	16309|16309	Mammalia	Rodentia	Cricetidae	Melanomys	Melanomys caliginosus
JFD1644
subject.tax.id	Count	query.acc.ver	subject.acc.ver	X..identity	Average.X..identity	X..identity.range	evalue	Average.evalue	evalue.range	alignment.length	Average.alignment.length	alignment.length.range	query.length	Average.query.length	query.length.range	subject.length	Average.subject.length	subject.length.range	class	order	family	genus	species
192403	1	6e9a3140-0ec1-47fe-af86-c38ee8440b79	JN659613.1	96.358	96.358	96.358|96.358	0	0	0|0	659	659	659|659	1348	1348	1348|1348	654	654	654|654	Mammalia	Chiroptera	Phyllostomidae	Sturnira	Sturnira erythromos
192402	5	08b71c27-82cf-4052-898b-181c151633af	KC753783.1	95.462	95.087	91.684|97.238	0	0	0|2.78e-113	1146	724.8	249|1146	7167	5225.2	288|9515	1140	1120.8	1044|1140	Mammalia	Chiroptera	Phyllostomidae	Sturnira	Sturnira bogotensis
192407	4	ab71427b-6c9c-4edf-b46c-f83c33406bca	AY395845.1	94.682	92.6347	90.019|94.682	0	1.6875e-41	0|6.75e-41	1523	802	130|1523	2822	1664.75	564|2822	2604	2604	2604|2604	Mammalia	Chiroptera	Phyllostomidae	Sturnira	Sturnira magna
192402	5	690a4306-d4c6-4520-831c-1c850cfd4fc3	KC753901.1	94.665	95.087	91.684|97.238	0	0	0|2.78e-113	881	724.8	249|1146	6061	5225.2	288|9515	1044	1120.8	1044|1140	Mammalia	Chiroptera	Phyllostomidae	Sturnira	Sturnira bogotensis
192407	4	8aca45a8-06cc-4895-af89-afa50b9aeb3b	AY395845.1	91.992	92.6347	90.019|94.682	0	1.6875e-41	0|6.75e-41	1024	802	130|1523	1048	1664.75	564|2822	2604	2604	2604|2604	Mammalia	Chiroptera	Phyllostomidae	Sturnira	Sturnira magna
192405	2	c06583c0-f769-4c44-872d-6166ef569f36	NC_065691.1	91.761	92.309	91.761|92.857	0	3.725e-96	0|7.45e-96	886	576	266|886	909	731	553|909	16641	16641	16641|16641	Mammalia	Chiroptera	Phyllostomidae	Sturnira	Sturnira ludovici
192402	5	ca379210-02c1-451c-b978-a12e42c1f66e	KC753783.1	91.684	95.087	91.684|97.238	0	0	0|2.78e-113	986	724.8	249|1146	3095	5225.2	288|9515	1140	1120.8	1044|1140	Mammalia	Chiroptera	Phyllostomidae	Sturnira	Sturnira bogotensis
27661	5	3a83d326-8a68-4b26-aa31-d9d58584678c	HG003314.1	90.78	91.1734	90.347|92.754	0	1.788e-13	0|8.94e-13	3525	899.8	75|3525	16587	3787.6	244|16587	16637	16637	16637|16637	Mammalia	Chiroptera	Phyllostomidae	Sturnira	Sturnira tildae
192402	5	fc1d8e3c-2aed-48fe-93fe-22a2935d2efd	KC753783.1	97.238	95.087	91.684|97.238	9.52e-174	0	0|2.78e-113	362	724.8	249|1146	9515	5225.2	288|9515	1140	1120.8	1044|1140	Mammalia	Chiroptera	Phyllostomidae	Sturnira	Sturnira bogotensis
192407	4	c1951d99-adf7-4023-bdd5-0a20fe0d64c9	AY395845.1	90.019	92.6347	90.019|94.682	6.65e-168	1.6875e-41	0|6.75e-41	531	802	130|1523	564	1664.75	564|2822	2604	2604	2604|2604	Mammalia	Chiroptera	Phyllostomidae	Sturnira	Sturnira magna
27661	5	8e5ed253-04c5-45be-bf59-b6c97114b88d	HG003314.1	90.347	91.1734	90.347|92.754	6.57e-125	1.788e-13	0|8.94e-13	404	899.8	75|3525	430	3787.6	244|16587	16637	16637	16637|16637	Mammalia	Chiroptera	Phyllostomidae	Sturnira	Sturnira tildae
192402	5	6e8c6f71-dc26-4a94-853f-c24b94648d16	KC753783.1	96.386	95.087	91.684|97.238	2.78e-113	0	0|2.78e-113	249	724.8	249|1146	288	5225.2	288|9515	1140	1120.8	1044|1140	Mammalia	Chiroptera	Phyllostomidae	Sturnira	Sturnira bogotensis
192405	2	5e596048-c04a-4296-bac1-ae0c624897ac	NC_065691.1	92.857	92.309	91.761|92.857	7.45e-96	3.725e-96	0|7.45e-96	266	576	266|886	553	731	553|909	16641	16641	16641|16641	Mammalia	Chiroptera	Phyllostomidae	Sturnira	Sturnira ludovici
27661	5	ff476f60-97a6-4cdb-9162-a8034c2620e2	HG003314.1	91.319	91.1734	90.347|92.754	1.47e-89	1.788e-13	0|8.94e-13	288	899.8	75|3525	355	3787.6	244|16587	16637	16637	16637|16637	Mammalia	Chiroptera	Phyllostomidae	Sturnira	Sturnira tildae
94961	1	aac1573f-96a4-4e4b-92c0-2868407d0135	AF263222.1	90.647	90.647	90.647|90.647	1.72e-76	1.72e-76	1.72e-76|1.72e-76	278	278	278|278	6023	6023	6023|6023	2609	2609	2609|2609	Mammalia	Chiroptera	Mystacinidae	Mystacina	Mystacina tuberculata
27661	5	997ae820-476f-4631-96ed-f92986ec8f0a	HG003314.1	92.754	91.1734	90.347|92.754	3.04e-70	1.788e-13	0|8.94e-13	207	899.8	75|3525	244	3787.6	244|16587	16637	16637	16637|16637	Mammalia	Chiroptera	Phyllostomidae	Sturnira	Sturnira tildae
192407	4	4141e23f-99fc-4969-8b21-68fc1e5d466c	AY395845.1	93.846	92.6347	90.019|94.682	6.75e-41	1.6875e-41	0|6.75e-41	130	802	130|1523	2225	1664.75	564|2822	2604	2604	2604|2604	Mammalia	Chiroptera	Phyllostomidae	Sturnira	Sturnira magna
27634	1	03c206ba-8652-42e4-ab18-10740c834854	JN209840.1	95.062	95.062	95.062|95.062	1.13e-24	1.13e-24	1.13e-24|1.13e-24	81	81	81|81	4199	4199	4199|4199	16709	16709	16709|16709	Mammalia	Chiroptera	Phyllostomidae	Artibeus	Artibeus lituratus
76772	1	70365680-0a96-4ff8-ae1f-81d1af0e4346	KP698975.1	90.909	90.909	90.909|90.909	1.94e-20	1.94e-20	1.94e-20|1.94e-20	99	99	99|99	1365	1365	1365|1365	16457	16457	16457|16457	Mammalia	Rodentia	Sciuridae	Callospermophilus	Callospermophilus lateralis
40366	1	def2c247-181a-415c-ac9b-a34ca58f0ef4	HQ849834.1	93.651	93.651	93.651|93.651	5.85e-15	5.85e-15	5.85e-15|5.85e-15	63	63	63|63	1984	1984	1984|1984	15359	15359	15359|15359	Insecta	Diptera	Drosophilidae	Drosophila	Drosophila americana
163159	1	acaaa5bd-69d8-4530-812f-d10a67ee3760	MW310242.1	98.039	98.039	98.039|98.039	1.45e-14	1.45e-14	1.45e-14|1.45e-14	51	51	51|51	4889	4889	4889|4889	18902	18902	18902|18902	Insecta	Siphonaptera	Pulicidae	Xenopsylla	Xenopsylla cheopis
27661	5	45c1f3e5-19c2-43fa-bb86-7c0170022469	HG003314.1	90.667	91.1734	90.347|92.754	8.94e-13	1.788e-13	0|8.94e-13	75	899.8	75|3525	1322	3787.6	244|16587	16637	16637	16637|16637	Mammalia	Chiroptera	Phyllostomidae	Sturnira	Sturnira tildae
511369	1	33890595-ece7-44be-8b3f-0b8bb1a14808	MN737144.1	96.078	96.078	96.078|96.078	1.16e-11	1.16e-11	1.16e-11|1.16e-11	51	51	51|51	16946	16946	16946|16946	20227	20227	20227|20227	Malacostraca	Decapoda	Potamidae	Parapotamon	Parapotamon spinescens
1706456	1	11b0ab25-7dbc-4d33-81e6-e9aa25d6ff8c	MZ520324.1	94	94	94|94	1.53e-09	1.53e-09	1.53e-09|1.53e-09	50	50	50|50	2504	2504	2504|2504	15885	15885	15885|15885	Insecta	Lepidoptera	Erebidae	Dasychira	Dasychira tristis
1047103	1	6d62ba58-d8d5-4997-9bee-d7d30129739a	OK393685.1	95.349	95.349	95.349|95.349	1.61e-07	1.61e-07	1.61e-07|1.61e-07	43	43	43|43	1152	1152	1152|1152	15247	15247	15247|15247	Insecta	Lepidoptera	Nymphalidae	Athyma	Athyma zeroca
1983394	1	32a85a95-1bd6-4f06-8e2a-b5ba169f5b27	OP562409.1	91.489	91.489	91.489|91.489	2.63e-06	2.63e-06	2.63e-06|2.63e-06	47	47	47|47	4770	4770	4770|4770	18166	18166	18166|18166	Chondrichthyes	Myliobatiformes	Myliobatidae	Mobula	Mobula alfredi
187517	1	bcb08487-8159-4603-9ee8-a2fd8d4117da	NC_026114.1	97.143	97.143	97.143|97.143	2.86e-06	2.86e-06	2.86e-06|2.86e-06	35	35	35|35	1348	1348	1348|1348	16916	16916	16916|16916	Insecta	Blattodea	Termitidae	Microcerotermes	Microcerotermes parvus
JFD1641
subject.tax.id	Count	query.acc.ver	subject.acc.ver	X..identity	Average.X..identity	X..identity.range	evalue	Average.evalue	evalue.range	alignment.length	Average.alignment.length	alignment.length.range	query.length	Average.query.length	query.length.range	subject.length	Average.subject.length	subject.length.range	class	order	family	genus	species
40233	2	1814101e-0de6-45d0-b291-97683ca9d350	AY395836.1	96.526	93.382	90.238|96.526	0	0	0|6.61e-135	806	613	420|806	1462	967.5	473|1462	2601	9656	2601|16711	Mammalia	Chiroptera	Phyllostomidae	Carollia	Carollia perspicillata
138695	10	0e334800-8274-4046-b67b-18252d1b72a6	ON527785.1	94.971	93.9695	90.531|97.348	0	9.86e-98	0|9.86e-97	696	1396	259|5635	1173	3547.7	295|16602	16708	16707.2	16706|16708	Mammalia	Chiroptera	Phyllostomidae	Carollia	Carollia brevicauda
138695	10	be05ea68-23a6-4478-b4e9-d5a10a196136	ON527784.1	94.737	93.9695	90.531|97.348	0	9.86e-98	0|9.86e-97	703	1396	259|5635	742	3547.7	295|16602	16706	16707.2	16706|16708	Mammalia	Chiroptera	Phyllostomidae	Carollia	Carollia brevicauda
138695	10	d5b04dfd-0dda-4532-bbba-831cf0f15132	ON527785.1	94.129	93.9695	90.531|97.348	0	9.86e-98	0|9.86e-97	1499	1396	259|5635	2433	3547.7	295|16602	16708	16707.2	16706|16708	Mammalia	Chiroptera	Phyllostomidae	Carollia	Carollia brevicauda
138695	10	357c35ea-9ed7-4a67-86da-c8ab6273f73c	ON527784.1	93.725	93.9695	90.531|97.348	0	9.86e-98	0|9.86e-97	749	1396	259|5635	766	3547.7	295|16602	16706	16707.2	16706|16708	Mammalia	Chiroptera	Phyllostomidae	Carollia	Carollia brevicauda
138695	10	37f9b0fb-4787-4e3d-b287-e4409079023f	ON527784.1	92.209	93.9695	90.531|97.348	0	9.86e-98	0|9.86e-97	5635	1396	259|5635	12254	3547.7	295|16602	16706	16707.2	16706|16708	Mammalia	Chiroptera	Phyllostomidae	Carollia	Carollia brevicauda
138695	10	2635d054-c38c-4a5c-a10b-cf84661a39e9	ON527785.1	90.531	93.9695	90.531|97.348	0	9.86e-98	0|9.86e-97	3369	1396	259|5635	16602	3547.7	295|16602	16708	16707.2	16706|16708	Mammalia	Chiroptera	Phyllostomidae	Carollia	Carollia brevicauda
138695	10	a1119333-9c82-480c-9176-8398d78d8771	ON527785.1	93.689	93.9695	90.531|97.348	2.89e-173	9.86e-98	0|9.86e-97	412	1396	259|5635	508	3547.7	295|16602	16708	16707.2	16706|16708	Mammalia	Chiroptera	Phyllostomidae	Carollia	Carollia brevicauda
138695	10	6d7448ef-f02e-4f17-b008-5922d22efa30	ON527785.1	94.92	93.9695	90.531|97.348	9.76e-163	9.86e-98	0|9.86e-97	374	1396	259|5635	405	3547.7	295|16602	16708	16707.2	16706|16708	Mammalia	Chiroptera	Phyllostomidae	Carollia	Carollia brevicauda
40233	2	da2ce7b2-6c4d-42bf-b974-5cd47905ae6d	HG003309.1	90.238	93.382	90.238|96.526	6.61e-135	0	0|6.61e-135	420	613	420|806	473	967.5	473|1462	16711	9656	2601|16711	Mammalia	Chiroptera	Phyllostomidae	Carollia	Carollia perspicillata
138695	10	aaa8f610-2e82-402e-9232-8d99c1cea2ae	ON527785.1	97.348	93.9695	90.531|97.348	2.94e-126	9.86e-98	0|9.86e-97	264	1396	259|5635	299	3547.7	295|16602	16708	16707.2	16706|16708	Mammalia	Chiroptera	Phyllostomidae	Carollia	Carollia brevicauda
138695	10	bc93c9bc-2095-4d2c-b96d-2d823800bb11	ON527784.1	93.436	93.9695	90.531|97.348	9.86e-97	9.86e-98	0|9.86e-97	259	1396	259|5635	295	3547.7	295|16602	16706	16707.2	16706|16708	Mammalia	Chiroptera	Phyllostomidae	Carollia	Carollia brevicauda
2827210	1	3f88f1e2-22c2-4d1d-8510-dc4c61f12176	MW588896.1	90.625	90.625	90.625|90.625	3.17e-22	3.17e-22	3.17e-22|3.17e-22	96	96	96|96	355	355	355|355	16433	16433	16433|16433	Mammalia	Artiodactyla	Bovidae	Rupicapra	Rupicapra rupicapra
458959	1	fc91faa6-a226-4e2b-b3d1-c1ddf03b025d	MG253277.1	98.039	98.039	98.039|98.039	3.4e-14	3.4e-14	3.4e-14|3.4e-14	51	51	51|51	11443	11443	11443|11443	18704	18704	18704|18704	Insecta	Hymenoptera	Formicidae	Pheidole	Pheidole obscurithorax
7460	1	e6737550-df57-4dcf-a6b8-d6f7e3240929	MT745907.1	92.453	92.453	92.453|92.453	7.79e-09	7.79e-09	7.79e-09|7.79e-09	53	53	53|53	12660	12660	12660|12660	16390	16390	16390|16390	Insecta	Hymenoptera	Apidae	Apis	Apis mellifera
45748	1	f52ce0e2-9203-4400-9671-3f9db608c535	MT362562.1	95.122	95.122	95.122|95.122	4.65e-07	4.65e-07	4.65e-07|4.65e-07	41	41	41|41	12774	12774	12774|12774	16356	16356	16356|16356	Gastropoda	Littorinimorpha	Littorinidae	Littorina	Littorina brevicula
1454237	1	63a01406-43d1-400b-b01e-6369f6e35487	KR189008.1	91.071	91.071	91.071|91.071	5.25e-06	5.25e-06	5.25e-06|5.25e-06	56	56	56|56	9517	9517	9517|9517	15290	15290	15290|15290	Insecta	Lepidoptera	Hesperiidae	Hasora	Hasora anura
JFD1648
subject.tax.id	Count	query.acc.ver	subject.acc.ver	X..identity	Average.X..identity	X..identity.range	evalue	Average.evalue	evalue.range	alignment.length	Average.alignment.length	alignment.length.range	query.length	Average.query.length	query.length.range	subject.length	Average.subject.length	subject.length.range	class	order	family	genus	species
27642	6	0c64082f-1aa8-42fe-af7e-9e5df2e568ca	JF448522.1	93.485	92.0803	91.129|93.485	0	4.21667e-34	0|2.53e-33	660	353.667	124|660	9229	6685	389|13354	657	11573.3	657|16546	Mammalia	Chiroptera	Phyllostomidae	Anoura	Anoura caudifer
27642	6	38e60950-7f81-4be2-9863-2e007ec192a2	HG003307.1	91.915	92.0803	91.129|93.485	1.54e-164	4.21667e-34	0|2.53e-33	470	353.667	124|660	5475	6685	389|13354	16546	11573.3	657|16546	Mammalia	Chiroptera	Phyllostomidae	Anoura	Anoura caudifer
148021	5	4099bb12-6706-42cb-b58d-2eb4d097c3df	NC_065676.1	92.128	91.777	90.404|94	2.77e-160	1.228e-42	2.77e-160|6.14e-42	470	277.2	149|470	494	678.6	222|1828	16470	16470	16470|16470	Mammalia	Chiroptera	Phyllostomidae	Anoura	Anoura geoffroyi
148021	5	30cdd984-d982-46ec-b9ed-861a7c5209ce	NC_065676.1	94	91.777	90.404|94	5.75e-119	1.228e-42	2.77e-160|6.14e-42	300	277.2	149|470	465	678.6	222|1828	16470	16470	16470|16470	Mammalia	Chiroptera	Phyllostomidae	Anoura	Anoura geoffroyi
27642	6	9a0e37ef-da2d-4825-ac93-3c7e9025efcf	HG003307.1	93.06	92.0803	91.129|93.485	4.48e-114	4.21667e-34	0|2.53e-33	317	353.667	124|660	9913	6685	389|13354	16546	11573.3	657|16546	Mammalia	Chiroptera	Phyllostomidae	Anoura	Anoura caudifer
999941	5	8b30a324-091c-41f7-b0fd-5b141bda796f	NC_065675.1	92.652	92.4866	91.475|94.667	4.08e-107	4.24e-22	4.08e-107|2.12e-21	313	230.6	75|313	7385	5785.4	1202|8728	16507	16507	16507|16507	Mammalia	Chiroptera	Phyllostomidae	Anoura	Anoura cultrata
27642	6	86570fb7-b198-4b56-a091-72f78eaaa6cc	AY395835.1	91.589	92.0803	91.129|93.485	1.83e-105	4.21667e-34	0|2.53e-33	321	353.667	124|660	389	6685	389|13354	2599	11573.3	657|16546	Mammalia	Chiroptera	Phyllostomidae	Anoura	Anoura caudifer
999941	5	0b772bf9-6e0a-4a8e-85e0-a63b47c8f15a	NC_065675.1	91.586	92.4866	91.475|94.667	1.54e-101	4.24e-22	4.08e-107|2.12e-21	309	230.6	75|313	3471	5785.4	1202|8728	16507	16507	16507|16507	Mammalia	Chiroptera	Phyllostomidae	Anoura	Anoura cultrata
999941	5	37377aac-3ed8-46c1-9a58-59875251dfd5	NC_065675.1	91.475	92.4866	91.475|94.667	7.19e-98	4.24e-22	4.08e-107|2.12e-21	305	230.6	75|313	1202	5785.4	1202|8728	16507	16507	16507|16507	Mammalia	Chiroptera	Phyllostomidae	Anoura	Anoura cultrata
148021	5	124f4f2c-bd99-48dc-bc87-9589a5504d1a	NC_065676.1	91.078	91.777	90.404|94	5.76e-80	1.228e-42	2.77e-160|6.14e-42	269	277.2	149|470	1828	678.6	222|1828	16470	16470	16470|16470	Mammalia	Chiroptera	Phyllostomidae	Anoura	Anoura geoffroyi
148092	1	b81eb427-59a8-477b-9d49-d9c65611decb	AY395839.1	92.07	92.07	92.07|92.07	1.2e-73	1.2e-73	1.2e-73|1.2e-73	227	227	227|227	4683	4683	4683|4683	2603	2603	2603|2603	Mammalia	Chiroptera	Phyllostomidae	Erophylla	Erophylla sezekorni
27642	6	a8c8debe-9329-4d24-a66e-f9def106c29c	HG003307.1	91.304	92.0803	91.129|93.485	1.63e-65	4.21667e-34	0|2.53e-33	230	353.667	124|660	13354	6685	389|13354	16546	11573.3	657|16546	Mammalia	Chiroptera	Phyllostomidae	Anoura	Anoura caudifer
27647	1	34373cad-8965-4a61-930f-0994048ceaab	AY395807.1	90.213	90.213	90.213|90.213	2.03e-61	2.03e-61	2.03e-61|2.03e-61	235	235	235|235	12200	12200	12200|12200	2600	2600	2600|2600	Mammalia	Chiroptera	Phyllostomidae	Chiroderma	Chiroderma trinitatum
148021	5	a74a167e-7cac-483f-a621-c8b23f899224	NC_065676.1	90.404	91.777	90.404|94	1.01e-51	1.228e-42	2.77e-160|6.14e-42	198	277.2	149|470	384	678.6	222|1828	16470	16470	16470|16470	Mammalia	Chiroptera	Phyllostomidae	Anoura	Anoura geoffroyi
9421	2	70fe2f3b-2d72-4558-8734-ddda0aa56c00	HG003308.1	96.875	95.3365	93.798|96.875	2.98e-51	1.765e-42	2.98e-51|3.53e-42	128	128.5	128|129	16232	9000.5	1769|16232	16785	16785	16785|16785	Mammalia	Chiroptera	Phyllostomidae	Brachyphylla	Brachyphylla cavernarum
9421	2	20ff6463-8f60-4767-98be-a5df5895fe45	HG003308.1	93.798	95.3365	93.798|96.875	3.53e-42	1.765e-42	2.98e-51|3.53e-42	129	128.5	128|129	1769	9000.5	1769|16232	16785	16785	16785|16785	Mammalia	Chiroptera	Phyllostomidae	Brachyphylla	Brachyphylla cavernarum
999941	5	9ebaa633-ec3d-4d97-83fa-4eb69abfb7dc	NC_065675.1	92.053	92.4866	91.475|94.667	4.2e-42	4.24e-22	4.08e-107|2.12e-21	151	230.6	75|313	8141	5785.4	1202|8728	16507	16507	16507|16507	Mammalia	Chiroptera	Phyllostomidae	Anoura	Anoura cultrata
148021	5	324b58fa-0587-41a4-b195-5e024681cf92	NC_065676.1	91.275	91.777	90.404|94	6.14e-42	1.228e-42	2.77e-160|6.14e-42	149	277.2	149|470	222	678.6	222|1828	16470	16470	16470|16470	Mammalia	Chiroptera	Phyllostomidae	Anoura	Anoura geoffroyi
27642	6	e9dbb2d6-d997-4c24-9b34-521c1f09a5a6	HG003307.1	91.129	92.0803	91.129|93.485	2.53e-33	4.21667e-34	0|2.53e-33	124	353.667	124|660	1750	6685	389|13354	16546	11573.3	657|16546	Mammalia	Chiroptera	Phyllostomidae	Anoura	Anoura caudifer
118856	1	c013d2f4-5c15-4763-9309-4848d0125b87	NC_033353.1	91.045	91.045	91.045|91.045	4.73e-33	4.73e-33	4.73e-33|4.73e-33	134	134	134|134	3262	3262	3262|3262	16570	16570	16570|16570	Mammalia	Chiroptera	Mormoopidae	Pteronotus	Pteronotus personatus
94961	1	8bec1b82-5a88-452d-bf00-f1629586a501	AY197012.1	90.511	90.511	90.511|90.511	1.26e-30	1.26e-30	1.26e-30|1.26e-30	137	137	137|137	3751	3751	3751|3751	1204	1204	1204|1204	Mammalia	Chiroptera	Mystacinidae	Mystacina	Mystacina tuberculata
148041	1	a68620ed-6654-4b14-b02c-fc57fc791344	DQ312379.1	92.593	92.593	92.593|92.593	8.42e-29	8.42e-29	8.42e-29|8.42e-29	108	108	108|108	1107	1107	1107|1107	2086	2086	2086|2086	Mammalia	Chiroptera	Phyllostomidae	Vampyrodes	Vampyrodes caraccioli
2869855	1	fae01ac2-95bb-4a28-b1d5-4e46169b3f9f	MW982339.1	92.079	92.079	92.079|92.079	1.28e-24	1.28e-24	1.28e-24|1.28e-24	101	101	101|101	4741	4741	4741|4741	658	658	658|658	Insecta	Hemiptera	Miridae	Nicostratus	Nicostratus sp. CCDB-34776-E12
2019462	2	03e130c4-682f-421b-91d0-b76efb3a108a	NC_065687.1	91.837	92.585	91.837|93.333	7.82e-24	2.435e-17	7.82e-24|4.87e-17	98	86.5	75|98	508	7602	508|14696	16563	16563	16563|16563	Mammalia	Chiroptera	Phyllostomidae	Sturnira	Sturnira bakeri
999941	5	07cd5a61-ce5e-4ea4-908f-6a83680bb99b	NC_065675.1	94.667	92.4866	91.475|94.667	2.12e-21	4.24e-22	4.08e-107|2.12e-21	75	230.6	75|313	8728	5785.4	1202|8728	16507	16507	16507|16507	Mammalia	Chiroptera	Phyllostomidae	Anoura	Anoura cultrata
196700	1	aa803fdb-77ac-4eca-ab9a-7b8d1df4d42e	MW554922.1	93.333	93.333	93.333|93.333	1.63e-17	1.63e-17	1.63e-17|1.63e-17	75	75	75|75	4938	4938	4938|4938	16612	16612	16612|16612	Mammalia	Chiroptera	Phyllostomidae	Sturnira	Sturnira parvidens
2019462	2	a72603d5-83a5-4751-933f-3c1d9b5b73af	NC_065687.1	93.333	92.585	91.837|93.333	4.87e-17	2.435e-17	7.82e-24|4.87e-17	75	86.5	75|98	14696	7602	508|14696	16563	16563	16563|16563	Mammalia	Chiroptera	Phyllostomidae	Sturnira	Sturnira bakeri
73823	1	c9b12fab-7e47-4919-ba90-20644a706d3c	KT353994.1	91.667	91.667	91.667|91.667	3.29e-14	3.29e-14	3.29e-14|3.29e-14	72	72	72|72	208	208	208|208	378	378	378|378	Mammalia	Artiodactyla	Bovidae	Tetracerus	Tetracerus quadricornis
138977	1	83b25670-0f83-45e3-bea5-1c9ab25d19cc	MF143494.1	90.361	90.361	90.361|90.361	4.05e-14	4.05e-14	4.05e-14|4.05e-14	83	83	83|83	3509	3509	3509|3509	17083	17083	17083|17083	Mammalia	Chiroptera	Vespertilionidae	Myotis	Myotis horsfieldii
1421599	1	4baabac1-90c1-4199-8b5b-7bf08b68c3a7	KF385868.1	91.304	91.304	91.304|91.304	8.34e-13	8.34e-13	8.34e-13|8.34e-13	69	69	69|69	4753	4753	4753|4753	14216	14216	14216|14216	Insecta	Hymenoptera	Braconidae	Therophilus	Therophilus festivus
138696	1	525603e5-235c-4f7a-a646-50222abd27c6	NC_065677.1	91.304	91.304	91.304|91.304	4.83e-11	4.83e-11	4.83e-11|4.83e-11	69	69	69|69	4652	4652	4652|4652	16686	16686	16686|16686	Mammalia	Chiroptera	Phyllostomidae	Carollia	Carollia castanea
2897460	1	dcea64f7-5163-4303-9005-ca645b8ce7fb	MZ457331.1	95.238	95.238	95.238|95.238	1.25e-07	1.25e-07	1.25e-07|1.25e-07	42	42	42|42	13353	13353	13353|13353	15419	15419	15419|15419	Insecta	Hemiptera	Cicadellidae	Eurhadina	Eurhadina acapitata
130591	1	2d6e9cbb-bfca-4342-ab2e-1224d7a62f47	MT079612.1	97.368	97.368	97.368|97.368	3.01e-07	3.01e-07	3.01e-07|3.01e-07	38	38	38|38	8272	8272	8272|8272	15931	15931	15931|15931	Insecta	Hemiptera	Fulgoridae	Lycorma	Lycorma delicatula
225401	1	889379de-47bd-4259-81c0-965dc9593642	HQ184048.1	95	95	95|95	6.29e-07	6.29e-07	6.29e-07|6.29e-07	40	40	40|40	1157	1157	1157|1157	17159	17159	17159|17159	Mammalia	Chiroptera	Vespertilionidae	Myotis	Myotis formosus
1658278	1	4c6dc91b-f134-4500-bdbb-ee2070498d14	MW136652.1	97.143	97.143	97.143|97.143	4.16e-06	4.16e-06	4.16e-06|4.16e-06	35	35	35|35	1951	1951	1951|1951	697	697	697|697	Amphibia	Anura	Bufonidae	Rhinella	Rhinella alata
JFD1642
subject.tax.id	Count	query.acc.ver	subject.acc.ver	X..identity	Average.X..identity	X..identity.range	evalue	Average.evalue	evalue.range	alignment.length	Average.alignment.length	alignment.length.range	query.length	Average.query.length	query.length.range	subject.length	Average.subject.length	subject.length.range	class	order	family	genus	species
27634	11	a420ed77-c979-41b0-b1b9-285f4f1bcc59	JN209840.1	97.539	95.2815	90.559|98.773	0	0	0|3.69e-119	772	1938.82	256|15700	939	2154.82	306|16797	16709	16709	16709|16709	Mammalia	Chiroptera	Phyllostomidae	Artibeus	Artibeus lituratus
27634	11	afcf5cf5-195a-4fb3-8393-d784cfacaef9	JN209840.1	96.436	95.2815	90.559|98.773	0	0	0|3.69e-119	1010	1938.82	256|15700	1046	2154.82	306|16797	16709	16709	16709|16709	Mammalia	Chiroptera	Phyllostomidae	Artibeus	Artibeus lituratus
27634	11	d04acc22-d2b4-4ea8-88c6-1a876d2f4730	JN209840.1	95.626	95.2815	90.559|98.773	0	0	0|3.69e-119	503	1938.82	256|15700	999	2154.82	306|16797	16709	16709	16709|16709	Mammalia	Chiroptera	Phyllostomidae	Artibeus	Artibeus lituratus
27634	11	6d8eba67-e249-4e2d-a93d-6bb62ced2257	JN209840.1	95.108	95.2815	90.559|98.773	0	0	0|3.69e-119	15700	1938.82	256|15700	16797	2154.82	306|16797	16709	16709	16709|16709	Mammalia	Chiroptera	Phyllostomidae	Artibeus	Artibeus lituratus
27634	11	49bb78b6-23c0-4be4-acaa-5168f595aaf7	JN209840.1	94.489	95.2815	90.559|98.773	0	0	0|3.69e-119	617	1938.82	256|15700	1026	2154.82	306|16797	16709	16709	16709|16709	Mammalia	Chiroptera	Phyllostomidae	Artibeus	Artibeus lituratus
27634	11	d152128f-fd1f-4af4-9b41-0b037f268cc9	JN209840.1	91.322	95.2815	90.559|98.773	0	0	0|3.69e-119	749	1938.82	256|15700	764	2154.82	306|16797	16709	16709	16709|16709	Mammalia	Chiroptera	Phyllostomidae	Artibeus	Artibeus lituratus
27634	11	6309bcf1-fa6e-4b92-8cb8-e2c68d44887e	JN209840.1	90.559	95.2815	90.559|98.773	0	0	0|3.69e-119	752	1938.82	256|15700	749	2154.82	306|16797	16709	16709	16709|16709	Mammalia	Chiroptera	Phyllostomidae	Artibeus	Artibeus lituratus
27634	11	abf92670-b9ca-4c98-8c53-24399370d921	JN209840.1	98.209	95.2815	90.559|98.773	1.91e-170	0	0|3.69e-119	335	1938.82	256|15700	379	2154.82	306|16797	16709	16709	16709|16709	Mammalia	Chiroptera	Phyllostomidae	Artibeus	Artibeus lituratus
27634	11	a01bea21-9138-4a59-86fb-4cbfc9cba8e8	JN209840.1	98.773	95.2815	90.559|98.773	2.85e-169	0	0|3.69e-119	326	1938.82	256|15700	374	2154.82	306|16797	16709	16709	16709|16709	Mammalia	Chiroptera	Phyllostomidae	Artibeus	Artibeus lituratus
27634	11	a8a8529a-b932-404a-84a7-ca57cee2700f	JN209840.1	93.16	95.2815	90.559|98.773	2.88e-123	0	0|3.69e-119	307	1938.82	256|15700	324	2154.82	306|16797	16709	16709	16709|16709	Mammalia	Chiroptera	Phyllostomidae	Artibeus	Artibeus lituratus
27634	11	c3f47194-b787-4ae9-a919-b24861c73f0b	JN209840.1	96.875	95.2815	90.559|98.773	3.69e-119	0	0|3.69e-119	256	1938.82	256|15700	306	2154.82	306|16797	16709	16709	16709|16709	Mammalia	Chiroptera	Phyllostomidae	Artibeus	Artibeus lituratus
7460	1	17a09e1b-a94b-40b9-a0d3-b7a745ac5068	MT745902.1	100	100	100|100	3.57e-23	3.57e-23	3.57e-23|3.57e-23	61	61	61|61	8685	8685	8685|8685	16443	16443	16443|16443	Insecta	Hymenoptera	Apidae	Apis	Apis mellifera
66828	1	b6e03adc-51b4-42d5-a86e-63b9c353f20d	OP067230.1	95.238	95.238	95.238|95.238	9.88e-18	9.88e-18	9.88e-18|9.88e-18	63	63	63|63	11619	11619	11619|11619	30636	30636	30636|30636	Bivalvia	Pterioida	Isognomonidae	Isognomon	Isognomon alatus
414876	1	144bc0cf-d3b7-47a4-8e0c-3fd8952fc1bd	OU343166.1	90.323	90.323	90.323|90.323	6.59e-10	6.59e-10	6.59e-10|6.59e-10	62	62	62|62	1089	1089	1089|1089	17472	17472	17472|17472	Insecta	Diptera	Syrphidae	Xanthogramma	Xanthogramma pedissequum
2495015	1	98035f27-2c49-4025-9a8b-70cd47159e9f	OU343046.1	92.727	92.727	92.727|92.727	2.56e-09	2.56e-09	2.56e-09|2.56e-09	55	55	55|55	16184	16184	16184|16184	29669	29669	29669|29669	Insecta	Hymenoptera	Crabronidae	Ectemnius	Ectemnius lituratus
411715	1	da10be9c-451e-4d48-af2c-a9fe8a68f0e3	BK012631.1	100	100	100|100	1.92e-06	1.92e-06	1.92e-06|1.92e-06	33	33	33|33	13524	13524	13524|13524	25873	25873	25873|25873	Insecta	Hymenoptera	Formicidae	Orectognathus	Orectognathus versicolor
JFD1651
subject.tax.id	Count	query.acc.ver	subject.acc.ver	X..identity	Average.X..identity	X..identity.range	evalue	Average.evalue	evalue.range	alignment.length	Average.alignment.length	alignment.length.range	query.length	Average.query.length	query.length.range	subject.length	Average.subject.length	subject.length.range	class	order	family	genus	species
27638	1	9ea29aa0-74f5-4bdf-8edd-46852b8f1d7b	MK749502.1	99.248	99.248	99.248|99.248	3.34e-140	0	3.34e-140|3.34e-140	266	266	266|266	493	493	493|493	666	666	666|666	Mammalia	Chiroptera	Phyllostomidae	Glossophaga	Glossophaga soricina
32411	1	9303cab1-ff1a-4504-be7c-c8ebefc6fb05	AY787816.1	94.203	94.203	94.203|94.203	4.77e-17	4.77e-17	4.77e-17|4.77e-17	69	69	69|69	14395	14395	14395|14395	13416	13416	13416|13416	Insecta	Hymenoptera	Pergidae	Perga	Perga condei
590134	1	063bcc16-afcf-4593-85ba-a3685f98ef71	FJ611801.1	91.667	91.667	91.667|91.667	7.66e-06	7.66e-06	7.66e-06|7.66e-06	48	48	48|48	3571	3571	3571|3571	18442	18442	18442|18442	Insecta	Hymenoptera	Mutillidae	Wallacidia	Wallacidia oculata
JFD1650
subject.tax.id	Count	query.acc.ver	subject.acc.ver	X..identity	Average.X..identity	X..identity.range	evalue	Average.evalue	evalue.range	alignment.length	Average.alignment.length	alignment.length.range	query.length	Average.query.length	query.length.range	subject.length	Average.subject.length	subject.length.range	class	order	family	genus	species
27634	14	202f2e07-e1ea-4ecb-8ea1-4e2674d807f3	JN209840.1	95.208	93.3645	90.922|95.608	0	9.14286e-95	0|1.28e-93	1252	1525.36	233|9002	6656	2068.93	327|8913	16709	16709	16709|16709	Mammalia	Chiroptera	Phyllostomidae	Artibeus	Artibeus lituratus
51014	1	132cc3af-c714-4347-8d47-7cccbd383d09	HQ702540.1	94.99	94.99	94.99|94.99	0	0	0|0	519	519	519|519	540	540	540|540	1140	1140	1140|1140	Mammalia	Chiroptera	Phyllostomidae	Artibeus	Artibeus intermedius
27634	14	1754fd3b-3ee7-434e-ad99-a9e825f7f4d0	JN209840.1	94.695	93.3645	90.922|95.608	0	9.14286e-95	0|1.28e-93	622	1525.36	233|9002	995	2068.93	327|8913	16709	16709	16709|16709	Mammalia	Chiroptera	Phyllostomidae	Artibeus	Artibeus lituratus
27634	14	b7895ed9-762e-4664-8fde-fb842d27b040	JN209840.1	94.623	93.3645	90.922|95.608	0	9.14286e-95	0|1.28e-93	9002	1525.36	233|9002	8913	2068.93	327|8913	16709	16709	16709|16709	Mammalia	Chiroptera	Phyllostomidae	Artibeus	Artibeus lituratus
27634	14	fce79c3d-1647-4ca7-9337-ae8ba2c3f566	JN209840.1	94.258	93.3645	90.922|95.608	0	9.14286e-95	0|1.28e-93	1045	1525.36	233|9002	1073	2068.93	327|8913	16709	16709	16709|16709	Mammalia	Chiroptera	Phyllostomidae	Artibeus	Artibeus lituratus
27634	14	57b0af45-ffe5-41f5-b8f4-2c452632e361	JN209840.1	92.872	93.3645	90.922|95.608	0	9.14286e-95	0|1.28e-93	477	1525.36	233|9002	499	2068.93	327|8913	16709	16709	16709|16709	Mammalia	Chiroptera	Phyllostomidae	Artibeus	Artibeus lituratus
27634	14	01379481-9f35-462a-a5f4-2db429498670	JN209840.1	92.843	93.3645	90.922|95.608	0	9.14286e-95	0|1.28e-93	503	1525.36	233|9002	533	2068.93	327|8913	16709	16709	16709|16709	Mammalia	Chiroptera	Phyllostomidae	Artibeus	Artibeus lituratus
27634	14	fe838ee8-adb7-460f-883c-3a33002a3567	JN209840.1	92.466	93.3645	90.922|95.608	0	9.14286e-95	0|1.28e-93	876	1525.36	233|9002	1726	2068.93	327|8913	16709	16709	16709|16709	Mammalia	Chiroptera	Phyllostomidae	Artibeus	Artibeus lituratus
27634	14	129d870c-2055-44b5-ab7b-8ce2b767184e	JN209840.1	92.367	93.3645	90.922|95.608	0	9.14286e-95	0|1.28e-93	3000	1525.36	233|9002	3748	2068.93	327|8913	16709	16709	16709|16709	Mammalia	Chiroptera	Phyllostomidae	Artibeus	Artibeus lituratus
27634	14	e9ad8cee-422d-49b3-8d21-724794dd1787	JN209840.1	91.744	93.3645	90.922|95.608	0	9.14286e-95	0|1.28e-93	1187	1525.36	233|9002	1186	2068.93	327|8913	16709	16709	16709|16709	Mammalia	Chiroptera	Phyllostomidae	Artibeus	Artibeus lituratus
27634	14	5f7b6fc1-2113-46bb-aa22-8aeeab002476	JN209840.1	91.414	93.3645	90.922|95.608	0	9.14286e-95	0|1.28e-93	1747	1525.36	233|9002	1744	2068.93	327|8913	16709	16709	16709|16709	Mammalia	Chiroptera	Phyllostomidae	Artibeus	Artibeus lituratus
27634	14	3dd31514-a3aa-466b-a216-803c7d850d87	JN209840.1	90.922	93.3645	90.922|95.608	0	9.14286e-95	0|1.28e-93	716	1525.36	233|9002	714	2068.93	327|8913	16709	16709	16709|16709	Mammalia	Chiroptera	Phyllostomidae	Artibeus	Artibeus lituratus
27634	14	bb7bbf63-c651-4b8a-8574-1f191be66a56	JN209840.1	93.233	93.3645	90.922|95.608	5.56e-158	9.14286e-95	0|1.28e-93	399	1525.36	233|9002	433	2068.93	327|8913	16709	16709	16709|16709	Mammalia	Chiroptera	Phyllostomidae	Artibeus	Artibeus lituratus
27634	14	82cc9974-2d34-4014-824f-58c3da8eb71e	JN209840.1	95.608	93.3645	90.922|95.608	2.13e-127	9.14286e-95	0|1.28e-93	296	1525.36	233|9002	327	2068.93	327|8913	16709	16709	16709|16709	Mammalia	Chiroptera	Phyllostomidae	Artibeus	Artibeus lituratus
27634	14	537d1ca7-2d40-472d-866e-bd3afbb8590a	JN209840.1	94.85	93.3645	90.922|95.608	1.28e-93	9.14286e-95	0|1.28e-93	233	1525.36	233|9002	418	2068.93	327|8913	16709	16709	16709|16709	Mammalia	Chiroptera	Phyllostomidae	Artibeus	Artibeus lituratus
335753	1	24353c97-d3e7-4132-ab9e-abb5e8e74157	KX298888.1	98.182	98.182	98.182|98.182	1.36e-16	1.36e-16	1.36e-16|1.36e-16	55	55	55|55	10576	10576	10576|10576	18397	18397	18397|18397	Gastropoda	Trochida	Phasianellidae	Phasianella	Phasianella australis
158814	1	c40d2055-ea3c-4a58-8060-6d34c9b188cb	ON402807.1	98.182	98.182	98.182|98.182	1.37e-16	1.37e-16	1.37e-16|1.37e-16	55	55	55|55	10586	10586	10586|10586	16901	16901	16901|16901	NA	Testudines	Emydidae	Terrapene	Terrapene carolina
1143687	1	94c646dc-5230-4568-9d10-0aba57567910	KJ179556.1	93.846	93.846	93.846|93.846	1.3e-14	1.3e-14	1.3e-14|1.3e-14	65	65	65|65	4395	4395	4395|4395	500	500	500|500	Actinopteri	Cyprinodontiformes	Nothobranchiidae	Nothobranchius	Nothobranchius albimarginatus
2695194	1	2a3a8d22-5f9d-4348-99a2-f45756d08092	MW366997.1	93.478	93.478	93.478|93.478	1.06e-08	1.06e-08	1.06e-08|1.06e-08	46	46	46|46	312	312	312|312	15486	15486	15486|15486	Insecta	Lepidoptera	Oecophoridae	Ripeacma	Ripeacma umbellata
411715	1	bbd21838-69ba-4054-983b-d875901b75e8	BK012631.1	100	100	100|100	6.51e-08	6.51e-08	6.51e-08|6.51e-08	34	34	34|34	1807	1807	1807|1807	25873	25873	25873|25873	Insecta	Hymenoptera	Formicidae	Orectognathus	Orectognathus versicolor
56958	1	e00ee442-d23c-45d1-b4c2-483c04811a28	MT036796.1	95.122	95.122	95.122|95.122	2.27e-07	2.27e-07	2.27e-07|2.27e-07	41	41	41|41	6238	6238	6238|6238	16001	16001	16001|16001	Insecta	Diptera	Tephritidae	Ceratitis	Ceratitis rosa
309913	1	bbe58b73-e60e-4486-ad1e-80462e4a378d	MG725631.1	92	92	92|92	5.94e-07	5.94e-07	5.94e-07|5.94e-07	50	50	50|50	1094	1094	1094|1094	16251	16251	16251|16251	Mammalia	Artiodactyla	Suidae	Sus	Sus scrofa
753175	1	94272aa4-270e-41eb-909c-75f2bec83c4e	OK235312.1	97.222	97.222	97.222|97.222	3.13e-06	3.13e-06	3.13e-06|3.13e-06	36	36	36|36	5676	5676	5676|5676	15561	15561	15561|15561	Insecta	Lepidoptera	Nolidae	Earias	Earias clorana
43061	1	21214f16-40f7-4071-972d-e1088265921d	MF381584.1	97.143	97.143	97.143|97.143	3.95e-06	3.95e-06	3.95e-06|3.95e-06	35	35	35|35	1855	1855	1855|1855	15387	15387	15387|15387	Insecta	Diptera	Culicidae	Anopheles	Anopheles benarrochi
13110	1	666fc099-dd36-4c85-b027-4c88e36275bc	KJ596322.1	95.122	95.122	95.122|95.122	8.49e-06	8.49e-06	8.49e-06|8.49e-06	41	41	41|41	15356	15356	15356|15356	13040	13040	13040|13040	Ascidiacea	Aplousobranchia	Didemnidae	Lissoclinum	Lissoclinum patella
JFD1649
subject.tax.id	Count	query.acc.ver	subject.acc.ver	X..identity	Average.X..identity	X..identity.range	evalue	Average.evalue	evalue.range	alignment.length	Average.alignment.length	alignment.length.range	query.length	Average.query.length	query.length.range	subject.length	Average.subject.length	subject.length.range	class	order	family	genus	species
192402	1	f95b8c67-46ea-470e-9020-e7084e0ee082	KC753783.1	95.656	95.656	95.656|95.656	0	0	0|0	1151	1151	1151|1151	6801	6801	6801|6801	1140	1140	1140|1140	Mammalia	Chiroptera	Phyllostomidae	Sturnira	Sturnira bogotensis
27661	1	791248e3-3564-489e-8e31-3c8f5a3fde30	HG003314.1	92.966	92.966	92.966|92.966	0	0	0|0	981	981	981|981	994	994	994|994	16637	16637	16637|16637	Mammalia	Chiroptera	Phyllostomidae	Sturnira	Sturnira tildae
1328976	1	5cb4c5ef-14bb-45f3-8ba3-122f7ab8c3e0	KM981865.1	95.652	95.652	95.652|95.652	2.61e-20	2.61e-20	2.61e-20|2.61e-20	69	69	69|69	1837	1837	1837|1837	15392	15392	15392|15392	Insecta	Lepidoptera	Hesperiidae	Zinaida	Zinaida nascens
7227	1	3d0dab2b-dcd3-48e0-860a-c4352af6be09	KP843850.1	96.364	96.364	96.364|96.364	1.89e-13	1.89e-13	1.89e-13|1.89e-13	55	55	55|55	16280	16280	16280|16280	19532	19532	19532|19532	Insecta	Diptera	Drosophilidae	Drosophila	Drosophila melanogaster
987417	1	9a15400c-960b-4e34-b062-f60bcd5a1074	KP081949.1	94.643	94.643	94.643|94.643	2.67e-12	2.67e-12	2.67e-12|2.67e-12	56	56	56|56	1020	1020	1020|1020	492	492	492|492	Insecta	Lepidoptera	Erebidae	Arctornis	Arctornis lnigrum
192405	1	b2cc66b5-63b4-4adc-ad9d-261aecdc27be	NC_065691.1	90.909	90.909	90.909|90.909	6.2e-09	6.2e-09	6.2e-09|6.2e-09	55	55	55|55	684	684	684|684	16641	16641	16641|16641	Mammalia	Chiroptera	Phyllostomidae	Sturnira	Sturnira ludovici
2480640	1	9dacb761-fedc-472b-99d9-33ece38e6951	MH882499.1	100	100	100|100	2.1e-06	2.1e-06	2.1e-06|2.1e-06	32	32	32|32	3820	3820	3820|3820	15988	15988	15988|15988	Insecta	Coleoptera	NA	NA	Coleoptera sp. ctg056 ACP-2013
JFD1652
subject.tax.id	Count	query.acc.ver	subject.acc.ver	X..identity	Average.X..identity	X..identity.range	evalue	Average.evalue	evalue.range	alignment.length	Average.alignment.length	alignment.length.range	query.length	Average.query.length	query.length.range	subject.length	Average.subject.length	subject.length.range	class	order	family	genus	species
40233	4	f59175c7-43f3-4539-b4c4-1ef2981d6478	HG003309.1	97.599	94.8662	93.044|97.599	0	0	0|0	583	1039.25	583|1567	622	1174.5	622|1563	16711	13183.5	2601|16711	Mammalia	Chiroptera	Phyllostomidae	Carollia	Carollia perspicillata
138695	9	cd0923fc-1161-4c64-93d6-8f9f00376daf	ON527784.1	96.875	93.2431	90.196|96.875	0	0	0|0	448	1790.44	448|4826	488	2079.67	488|5255	16706	16707.1	16706|16708	Mammalia	Chiroptera	Phyllostomidae	Carollia	Carollia brevicauda
40233	4	260fca13-9da0-4f51-b455-092a14d30d10	HG003309.1	94.56	94.8662	93.044|97.599	0	0	0|0	1397	1039.25	583|1567	1435	1174.5	622|1563	16711	13183.5	2601|16711	Mammalia	Chiroptera	Phyllostomidae	Carollia	Carollia perspicillata
138695	9	2904c8ed-3ed9-4fb3-87f1-c72d0e6a24e8	ON527784.1	94.385	93.2431	90.196|96.875	0	0	0|0	4826	1790.44	448|4826	5255	2079.67	488|5255	16706	16707.1	16706|16708	Mammalia	Chiroptera	Phyllostomidae	Carollia	Carollia brevicauda
40233	4	6d473e85-6555-4c35-83be-38e98df7ff74	HG003309.1	94.262	94.8662	93.044|97.599	0	0	0|0	610	1039.25	583|1567	1078	1174.5	622|1563	16711	13183.5	2601|16711	Mammalia	Chiroptera	Phyllostomidae	Carollia	Carollia perspicillata
138695	9	14dc4f9f-cba0-47ce-983a-82b4abc34dc7	ON527784.1	94.012	93.2431	90.196|96.875	0	0	0|0	1169	1790.44	448|4826	1185	2079.67	488|5255	16706	16707.1	16706|16708	Mammalia	Chiroptera	Phyllostomidae	Carollia	Carollia brevicauda
138695	9	1ac046cf-7890-4baf-abd4-6782ba932272	ON527785.1	93.816	93.2431	90.196|96.875	0	0	0|0	663	1790.44	448|4826	1201	2079.67	488|5255	16708	16707.1	16706|16708	Mammalia	Chiroptera	Phyllostomidae	Carollia	Carollia brevicauda
138695	9	8265779f-6d31-4981-9103-3abd35a4cae8	ON527785.1	93.102	93.2431	90.196|96.875	0	0	0|0	2798	1790.44	448|4826	3444	2079.67	488|5255	16708	16707.1	16706|16708	Mammalia	Chiroptera	Phyllostomidae	Carollia	Carollia brevicauda
40233	4	a33efc9f-7a02-4f4c-a06a-c04efa4e21d3	AY395836.1	93.044	94.8662	93.044|97.599	0	0	0|0	1567	1039.25	583|1567	1563	1174.5	622|1563	2601	13183.5	2601|16711	Mammalia	Chiroptera	Phyllostomidae	Carollia	Carollia perspicillata
138695	9	46d63f2f-19d3-4834-a2d1-58c30604afd9	ON527784.1	92.672	93.2431	90.196|96.875	0	0	0|0	655	1790.44	448|4826	681	2079.67	488|5255	16706	16707.1	16706|16708	Mammalia	Chiroptera	Phyllostomidae	Carollia	Carollia brevicauda
138695	9	6f4655e0-68d1-4059-99bd-ea806759af91	ON527785.1	92.489	93.2431	90.196|96.875	0	0	0|0	4234	1790.44	448|4826	4166	2079.67	488|5255	16708	16707.1	16706|16708	Mammalia	Chiroptera	Phyllostomidae	Carollia	Carollia brevicauda
138695	9	07303254-b3de-4eb8-a1a1-f701b9e0d065	ON527785.1	91.641	93.2431	90.196|96.875	0	0	0|0	658	1790.44	448|4826	1181	2079.67	488|5255	16708	16707.1	16706|16708	Mammalia	Chiroptera	Phyllostomidae	Carollia	Carollia brevicauda
138695	9	c2f6d0a3-0ef8-46b9-b331-da2ed5521cfe	ON527785.1	90.196	93.2431	90.196|96.875	0	0	0|0	663	1790.44	448|4826	1116	2079.67	488|5255	16708	16707.1	16706|16708	Mammalia	Chiroptera	Phyllostomidae	Carollia	Carollia brevicauda
9606	2	6712dc29-074a-4c98-914d-e4a7b1768261	MZ921222.1	97.131	97.137	97.131|97.143	5.15e-115	1.82e-06	5.15e-115|3.64e-06	244	139.5	35|244	313	1009	313|1705	16570	8311	52|16570	Mammalia	Primates	Hominidae	Homo	Homo sapiens
115122	1	c36b6c8e-f47d-4fd6-9eec-49cb8dc2558a	KT935541.1	92.5	92.5	92.5|92.5	1.78e-06	1.78e-06	1.78e-06|1.78e-06	40	40	40|40	233	233	233|233	18079	18079	18079|18079	Aves	Accipitriformes	Accipitridae	Buteo	Buteo hemilasius
9606	2	e2862ca6-3458-4c8b-ab28-4ac26ab6854e	AX002001.1	97.143	97.137	97.131|97.143	3.64e-06	1.82e-06	5.15e-115|3.64e-06	35	139.5	35|244	1705	1009	313|1705	52	8311	52|16570	Mammalia	Primates	Hominidae	Homo	Homo sapiens
1658278	1	c92fd0ad-bbe1-46af-821d-67029cb1de11	MW136652.1	100	100	100|100	6.37e-06	6.37e-06	6.37e-06|6.37e-06	29	29	29|29	216	216	216|216	697	697	697|697	Amphibia	Anura	Bufonidae	Rhinella	Rhinella alata
2737508	1	e2cfce6a-2eb5-4efe-98a4-a2e5e867d2f7	ON101924.1	94.872	94.872	94.872|94.872	7.76e-06	7.76e-06	7.76e-06|7.76e-06	39	39	39|39	944	944	944|944	15345	15345	15345|15345	Insecta	Hymenoptera	Braconidae	Triraphis	Triraphis sp. CNIN 4028
JFD1634
subject.tax.id	Count	query.acc.ver	subject.acc.ver	X..identity	Average.X..identity	X..identity.range	evalue	Average.evalue	evalue.range	alignment.length	Average.alignment.length	alignment.length.range	query.length	Average.query.length	query.length.range	subject.length	Average.subject.length	subject.length.range	class	order	family	genus	species
2964401	5	e36038a2-a924-4258-bf86-5d6f9cde0789	MZ364419.1	92.664	91.7818	91.336|92.664	0	0	0|5.5e-149	518	546.8	448|661	544	4857.4	544|15934	658	612.4	544|658	Mammalia	Rodentia	Cricetidae	Nephelomys	Nephelomys childi
1734924	9	16418988-d640-47d4-8d6a-5e1c9178670e	MN547686.1	92.176	91.6398	90.303|93.258	0	2.40243e-90	0|2.16e-89	1112	629.667	267|1155	3087	4930.67	1069|15166	1149	924	592|1149	Mammalia	Rodentia	Cricetidae	Nephelomys	Nephelomys devius
2964401	5	1af7dd2e-c93f-46d1-9a73-5f8cbd0c247e	MZ364464.1	91.863	91.7818	91.336|92.664	0	0	0|5.5e-149	553	546.8	448|661	5045	4857.4	544|15934	544	612.4	544|658	Mammalia	Rodentia	Cricetidae	Nephelomys	Nephelomys childi
2964401	5	b448c388-fa1b-4509-97d7-e46cec422502	MZ364421.1	91.528	91.7818	91.336|92.664	0	0	0|5.5e-149	661	546.8	448|661	2179	4857.4	544|15934	658	612.4	544|658	Mammalia	Rodentia	Cricetidae	Nephelomys	Nephelomys childi
2964401	5	5794bbd4-1c53-47cf-b784-0ba0d6ac1b39	MZ364464.1	91.336	91.7818	91.336|92.664	0	0	0|5.5e-149	554	546.8	448|661	15934	4857.4	544|15934	544	612.4	544|658	Mammalia	Rodentia	Cricetidae	Nephelomys	Nephelomys childi
1734924	9	9b069e0e-bc80-4bfd-91a3-4e3e9776813a	MN547686.1	91.332	91.6398	90.303|93.258	0	2.40243e-90	0|2.16e-89	1119	629.667	267|1155	12373	4930.67	1069|15166	1149	924	592|1149	Mammalia	Rodentia	Cricetidae	Nephelomys	Nephelomys devius
1734924	9	56efaac7-bed6-46ad-b3a0-76c63a62b3a9	KP778209.1	90.698	91.6398	90.303|93.258	0	2.40243e-90	0|2.16e-89	688	629.667	267|1155	15166	4930.67	1069|15166	1143	924	592|1149	Mammalia	Rodentia	Cricetidae	Nephelomys	Nephelomys devius
1734924	9	4c522598-77cb-463f-9dce-6ba68dd4fe66	MN547686.1	90.303	91.6398	90.303|93.258	0	2.40243e-90	0|2.16e-89	1155	629.667	267|1155	6261	4930.67	1069|15166	1149	924	592|1149	Mammalia	Rodentia	Cricetidae	Nephelomys	Nephelomys devius
269650	1	035560df-6125-4c35-926e-b33fec4627e9	OK323269.1	90.476	90.476	90.476|90.476	2.83e-161	0	2.83e-161|2.83e-161	504	504	504|504	755	755	755|755	16300	16300	16300|16300	Mammalia	Rodentia	Cricetidae	Chionomys	Chionomys roberti
530178	4	e58c3022-1e40-4758-a08b-e5aaa609513f	JF693848.1	94.041	92.7625	91.367|94.041	8.91e-157	2.775e-47	8.91e-157|1.11e-46	386	303	155|393	456	2070.25	456|6000	384	488.25	384|801	Mammalia	Rodentia	Cricetidae	Nephelomys	Nephelomys albigularis
530178	4	861db115-3c95-4f4c-97c8-8ea825203c36	JF693848.1	93.384	92.7625	91.367|94.041	2.82e-153	2.775e-47	8.91e-157|1.11e-46	393	303	155|393	6000	2070.25	456|6000	384	488.25	384|801	Mammalia	Rodentia	Cricetidae	Nephelomys	Nephelomys albigularis
2964401	5	5c39931a-dc3a-4719-8f99-f7fe4df44272	MZ364420.1	91.518	91.7818	91.336|92.664	5.5e-149	0	0|5.5e-149	448	546.8	448|661	585	4857.4	544|15934	658	612.4	544|658	Mammalia	Rodentia	Cricetidae	Nephelomys	Nephelomys childi
1734924	9	f5f76eb0-3660-44df-b44c-14b281e36e3d	KP778654.1	91.563	91.6398	90.303|93.258	4.38e-138	2.40243e-90	0|2.16e-89	403	629.667	267|1155	1069	4930.67	1069|15166	592	924	592|1149	Mammalia	Rodentia	Cricetidae	Nephelomys	Nephelomys devius
216125	1	3d350525-3a3d-4a25-a0d6-a6fae3143f40	OU744738.1	98.734	98.734	98.734|98.734	1.02e-118	0	1.02e-118|1.02e-118	237	237	237|237	3080	3080	3080|3080	19173	19173	19173|19173	Gastropoda	Trochida	Trochidae	Steromphala	Steromphala cineraria
530172	2	e01dc34e-e02e-47e3-bb1b-a5608e4c2772	KP778473.1	95.088	92.9035	90.719|95.088	2.86e-117	0	2.86e-117|1.86e-101	285	309.5	285|334	394	741.5	394|1089	610	610	610|610	Mammalia	Rodentia	Cricetidae	Handleyomys	Handleyomys rostratus
2904038	3	5bf0e139-a76e-4898-be1e-435c0f1a15ec	MZ736551.1	91.765	92.2333	91.406|93.529	2.35e-114	5.43333e-57	2.35e-114|1.63e-56	340	255.333	170|340	363	1931.33	363|4745	801	801	801|801	Mammalia	Rodentia	Cricetidae	Nephelomys	Nephelomys ricardopalmai
1734924	9	ed235b68-3a35-4a94-a34d-fbd21c856007	KP778481.1	92.429	91.6398	90.303|93.258	1.11e-113	2.40243e-90	0|2.16e-89	317	629.667	267|1155	1628	4930.67	1069|15166	592	924	592|1149	Mammalia	Rodentia	Cricetidae	Nephelomys	Nephelomys devius
1734924	9	65c39930-6f82-4ee5-a89f-7557f96dd090	KP778654.1	90.691	91.6398	90.303|93.258	8.21e-104	2.40243e-90	0|2.16e-89	333	629.667	267|1155	1107	4930.67	1069|15166	592	924	592|1149	Mammalia	Rodentia	Cricetidae	Nephelomys	Nephelomys devius
530171	1	1c8d1d54-ddae-440f-9285-e127527c8450	KP778470.1	93.056	93.056	93.056|93.056	2.93e-103	0	2.93e-103|2.93e-103	288	288	288|288	1017	1017	1017|1017	613	613	613|613	Mammalia	Rodentia	Cricetidae	Handleyomys	Handleyomys alfaroi
530172	2	9ae473e1-5244-41dc-a485-25ad51787860	KP778473.1	90.719	92.9035	90.719|95.088	1.86e-101	0	2.86e-117|1.86e-101	334	309.5	285|334	1089	741.5	394|1089	610	610	610|610	Mammalia	Rodentia	Cricetidae	Handleyomys	Handleyomys rostratus
89099	1	e17af3c0-e1e3-4d36-9d14-0bc9cbf6b6c3	KP027790.1	92.027	92.027	92.027|92.027	7.78e-101	1e-100	7.78e-101|7.78e-101	301	301	301|301	1168	1168	1168|1168	860	860	860|860	Mammalia	Rodentia	Cricetidae	Hylaeamys	Hylaeamys megacephalus
106112	3	1380afc7-e5f7-4404-a6a6-5569bcd51001	KF769456.1	90.657	91.8403	90.476|94.388	1.79e-93	2.1e-54	1.79e-93|6.3e-54	289	224.667	189|289	574	1761	574|2657	16378	16378	16378|16378	Mammalia	Rodentia	Cricetidae	Akodon	Akodon montensis
1734924	9	98f4f848-8e65-4478-b635-99add2ab2acc	MN547684.1	93.258	91.6398	90.303|93.258	2.19e-92	2.40243e-90	0|2.16e-89	267	629.667	267|1155	1756	4930.67	1069|15166	1149	924	592|1149	Mammalia	Rodentia	Cricetidae	Nephelomys	Nephelomys devius
1734924	9	18314f3b-8eb8-4440-9d83-14a7eb14410f	KP778272.1	92.308	91.6398	90.303|93.258	2.16e-89	2.40243e-90	0|2.16e-89	273	629.667	267|1155	1929	4930.67	1069|15166	801	924	592|1149	Mammalia	Rodentia	Cricetidae	Nephelomys	Nephelomys devius
530178	4	385573aa-6aa4-4248-87b3-b396de8d66b3	JF693848.1	91.367	92.7625	91.367|94.041	4.54e-89	2.775e-47	8.91e-157|1.11e-46	278	303	155|393	1052	2070.25	456|6000	384	488.25	384|801	Mammalia	Rodentia	Cricetidae	Nephelomys	Nephelomys albigularis
1890048	1	b06d0836-cfc1-4b5e-b0f8-6e0595614161	MN807609.1	90.657	90.657	90.657|90.657	1.67e-84	1.67e-84	1.67e-84|1.67e-84	289	289	289|289	2795	2795	2795|2795	16259	16259	16259|16259	Mammalia	Rodentia	Muridae	Aethomys	Aethomys nyikae
2964402	1	7435ab05-d0a7-4b97-b53b-2a4f854b4b2c	MZ364468.1	92.4	92.4	92.4|92.4	8.76e-84	8.76e-84	8.76e-84|8.76e-84	250	250	250|250	3762	3762	3762|3762	542	542	542|542	Mammalia	Rodentia	Cricetidae	Nephelomys	Nephelomys meridensis
1499496	1	9d19f7b5-3453-4ba5-98cd-0888604ca52d	KP778591.1	90.706	90.706	90.706|90.706	5.21e-80	5.21e-80	5.21e-80|5.21e-80	269	269	269|269	1654	1654	1654|1654	615	615	615|615	Mammalia	Rodentia	Cricetidae	Handleyomys	Handleyomys chapmani
2904038	3	d404d7cb-da85-4a06-b0b0-ab1bb5814902	MZ736551.1	91.406	92.2333	91.406|93.529	3.22e-79	5.43333e-57	2.35e-114|1.63e-56	256	255.333	170|340	686	1931.33	363|4745	801	801	801|801	Mammalia	Rodentia	Cricetidae	Nephelomys	Nephelomys ricardopalmai
89458	1	aeb8a8c8-1049-4baf-92b3-f6dcace64aeb	MT408180.1	92.609	92.609	92.609|92.609	1.04e-73	1.04e-73	1.04e-73|1.04e-73	230	230	230|230	15747	15747	15747|15747	16245	16245	16245|16245	Mammalia	Rodentia	Muridae	Stenocephalemys	Stenocephalemys albocaudata
106112	3	9f95337e-b7d7-4bc6-bcf6-1e12dd0e6af0	KF769456.1	94.388	91.8403	90.476|94.388	2.64e-73	2.1e-54	1.79e-93|6.3e-54	196	224.667	189|289	2657	1761	574|2657	16378	16378	16378|16378	Mammalia	Rodentia	Cricetidae	Akodon	Akodon montensis
218826	2	1717524f-5f92-49f7-8696-289e6582cb8e	MF696155.1	90.079	90.6175	90.079|91.156	1.54e-66	1.71e-40	1.54e-66|3.42e-40	252	199.5	147|252	4916	2836.5	757|4916	16314	16314	16314|16314	Mammalia	Rodentia	Cricetidae	Oligoryzomys	Oligoryzomys stramineus
2904038	3	753d14a8-b716-418d-ba5a-0ec587fb8fb1	MZ736551.1	93.529	92.2333	91.406|93.529	1.63e-56	5.43333e-57	2.35e-114|1.63e-56	170	255.333	170|340	4745	1931.33	363|4745	801	801	801|801	Mammalia	Rodentia	Cricetidae	Nephelomys	Nephelomys ricardopalmai
144753	3	e4c801f5-12db-4c7e-bfbe-8a9dabc5adb3	KY707308.1	95.683	93.9723	91.27|95.683	1.42e-54	3.86667e-33	1.42e-54|1.16e-32	139	134.667	126|139	479	1330.33	479|2065	16672	16672	16672|16672	Mammalia	Rodentia	Cricetidae	Peromyscus	Peromyscus crinitus
106112	3	1dc1f807-2f10-4cdb-baa2-34ea277cbbf5	KF769456.1	90.476	91.8403	90.476|94.388	6.3e-54	2.1e-54	1.79e-93|6.3e-54	189	224.667	189|289	2052	1761	574|2657	16378	16378	16378|16378	Mammalia	Rodentia	Cricetidae	Akodon	Akodon montensis
144753	3	47976207-50e2-4a4f-8eb8-3fd8d5eb1602	KY707308.1	94.964	93.9723	91.27|95.683	3.98e-51	3.86667e-33	1.42e-54|1.16e-32	139	134.667	126|139	1447	1330.33	479|2065	16672	16672	16672|16672	Mammalia	Rodentia	Cricetidae	Peromyscus	Peromyscus crinitus
3029580	2	e3a1fec5-38af-409c-b858-7f6b15aeb76c	OM810001.1	91.099	93.2055	91.099|95.312	8.1e-51	8.5e-17	8.1e-51|1.7e-16	191	127.5	64|191	767	6987	767|13207	16113	16080.5	16048|16113	Mammalia	Rodentia	Cricetidae	Lasiopodomys	Lasiopodomys anglicus
530178	4	598599fc-e2a9-4415-9a5e-255d819e67cf	MZ736541.1	92.258	92.7625	91.367|94.041	1.11e-46	2.775e-47	8.91e-157|1.11e-46	155	303	155|393	773	2070.25	456|6000	801	488.25	384|801	Mammalia	Rodentia	Cricetidae	Nephelomys	Nephelomys albigularis
200942	1	1b1c41a6-c316-4815-aa41-8fea4d2d779b	AJ496312.1	90.503	90.503	90.503|90.503	1.18e-46	1.18e-46	1.18e-46|1.18e-46	179	179	179|179	12168	12168	12168|12168	941	941	941|941	Mammalia	Rodentia	Cricetidae	Oecomys	Oecomys rutilus
9947	1	0a6acc57-3f76-4b96-b8c6-d2142a0f0b28	LN873135.1	93.197	93.197	93.197|93.197	5.57e-46	5.57e-46	5.57e-46|5.57e-46	147	147	147|147	987	987	987|987	16401	16401	16401|16401	Mammalia	Artiodactyla	Bovidae	Tragelaphus	Tragelaphus imberbis
470139	1	35f57452-d9bd-428f-95ed-326b6da9ffe1	ON165383.1	90.303	90.303	90.303|90.303	2.59e-42	2.59e-42	2.59e-42|2.59e-42	165	165	165|165	1303	1303	1303|1303	16348	16348	16348|16348	Mammalia	Rodentia	Cricetidae	Microtus	Microtus maximowiczii
491861	1	ba216c98-d2b9-4f9d-8ff1-4b5466472765	NC_053796.1	90.303	90.303	90.303|90.303	7.15e-41	7.15e-41	7.15e-41|7.15e-41	165	165	165|165	621	621	621|621	16313	16313	16313|16313	Mammalia	Rodentia	Muridae	Grammomys	Grammomys surdaster
218826	2	88766f68-a954-4b6d-b14e-e3f184e7ec15	MF696155.1	91.156	90.6175	90.079|91.156	3.42e-40	1.71e-40	1.54e-66|3.42e-40	147	199.5	147|252	757	2836.5	757|4916	16314	16314	16314|16314	Mammalia	Rodentia	Cricetidae	Oligoryzomys	Oligoryzomys stramineus
218793	1	1878e84f-5d30-476d-8148-d95cebd4da09	MH939287.1	90.909	90.909	90.909|90.909	9.98e-38	9.98e-38	9.98e-38|9.98e-38	132	132	132|132	953	953	953|953	16309	16309	16309|16309	Mammalia	Rodentia	Cricetidae	Melanomys	Melanomys caliginosus
2494721	1	d0744777-5db1-4fc7-8505-a0389f1a7436	MZ353592.1	91.045	91.045	91.045|91.045	7.49e-36	7.49e-36	7.49e-36|7.49e-36	134	134	134|134	1202	1202	1202|1202	16274	16274	16274|16274	Mammalia	Rodentia	Muridae	Lophuromys	Lophuromys menageshae
2613866	1	fc10e26d-c7ed-4cb4-8240-e3f681794d7a	ON165313.1	91.667	91.667	91.667|91.667	3.43e-35	3.43e-35	3.43e-35|3.43e-35	132	132	132|132	377	377	377|377	16333	16333	16333|16333	Mammalia	Rodentia	Cricetidae	Neodon	Neodon sp. l BGI-2019
1433299	2	932ed10c-4266-465f-a73b-b42fa7a02efe	MT078818.1	92.373	91.7615	91.15|92.373	5.73e-35	9.6e-27	5.73e-35|1.92e-26	118	115.5	113|118	2344	3277.5	2344|4211	15975	15975	15975|15975	Mammalia	Rodentia	Cricetidae	Peromyscus	Peromyscus mekisturus
259050	1	d5f3b085-bdb7-4688-b9c2-174e82674a54	ON165280.1	91.27	91.27	91.27|91.27	2.24e-33	2.24e-33	2.24e-33|2.24e-33	126	126	126|126	415	415	415|415	16346	16346	16346|16346	Mammalia	Rodentia	Cricetidae	Eothenomys	Eothenomys custos
144753	3	49982c83-1483-4584-8b02-ce64e70625d4	KY707308.1	91.27	93.9723	91.27|95.683	1.16e-32	3.86667e-33	1.42e-54|1.16e-32	126	134.667	126|139	2065	1330.33	479|2065	16672	16672	16672|16672	Mammalia	Rodentia	Cricetidae	Peromyscus	Peromyscus crinitus
1047088	1	d159776c-0f20-48cb-9a00-d7d3d13e29af	ON165390.1	90.511	90.511	90.511|90.511	8.26e-32	8.26e-32	8.26e-32|8.26e-32	137	137	137|137	978	978	978|978	6666	6666	6666|6666	Mammalia	Rodentia	Cricetidae	Arvicola	Arvicola amphibius
97213	1	1a6f98d6-b830-49eb-867f-b5f68154556f	KY707309.1	93.519	93.519	93.519|93.519	2.98e-31	2.98e-31	2.98e-31|2.98e-31	108	108	108|108	907	907	907|907	16692	16692	16692|16692	Mammalia	Rodentia	Cricetidae	Peromyscus	Peromyscus pectoralis
85953	1	9d54726e-041c-4e98-8b82-8d56f6b2a69c	MN792984.1	93.878	93.878	93.878|93.878	4.48e-29	4.48e-29	4.48e-29|4.48e-29	98	98	98|98	2275	2275	2275|2275	16340	16340	16340|16340	Mammalia	Rodentia	Cricetidae	Dicrostonyx	Dicrostonyx groenlandicus
36722	1	2a5f7909-eaa1-4dd9-b820-80a1503a2aaa	FJ705137.1	90.598	90.598	90.598|90.598	4.54e-29	4.54e-29	4.54e-29|4.54e-29	117	117	117|117	8917	8917	8917|8917	1104	1104	1104|1104	Mammalia	Carnivora	Mustelidae	Martes	Martes zibellina
452642	2	c52b676c-b64f-48dd-a7b7-d80c52cde289	KY117556.1	96.386	95.812	95.238|96.386	2.01e-28	6e-08	2.01e-28|1.2e-07	83	62.5	42|83	10113	6708.5	3304|10113	16586	16586	16586|16586	Mammalia	Carnivora	Mustelidae	Lutra	Lutra sumatrana
492276	1	73293acd-1e66-4db9-ada0-742654d8cadc	EU192185.1	90.741	90.741	90.741|90.741	1.75e-26	1.75e-26	1.75e-26|1.75e-26	108	108	108|108	273	273	273|273	952	952	952|952	Mammalia	Rodentia	Cricetidae	Oligoryzomys	Oligoryzomys sp. B MUSA2625
1433299	2	c07cff7b-b191-4b12-b103-d73e3b11b8f1	MT078818.1	91.15	91.7615	91.15|92.373	1.92e-26	9.6e-27	5.73e-35|1.92e-26	113	115.5	113|118	4211	3277.5	2344|4211	15975	15975	15975|15975	Mammalia	Rodentia	Cricetidae	Peromyscus	Peromyscus mekisturus
209855	1	e5ffc1d7-62a1-4236-a288-19dd0942c045	MZ131550.1	93.478	93.478	93.478|93.478	6.62e-25	6.62e-25	6.62e-25|6.62e-25	92	92	92|92	648	648	648|648	16254	16254	16254|16254	Mammalia	Rodentia	Muridae	Hylomyscus	Hylomyscus parvus
10094	1	776f1035-d345-4c8a-b659-3b3eaae57342	MN964116.1	92.473	92.473	92.473|92.473	1.07e-24	1.07e-24	1.07e-24|1.07e-24	93	93	93|93	282	282	282|282	11448	11448	11448|11448	Mammalia	Rodentia	Muridae	Mus	Mus saxicola
218824	1	e14aef2c-3dab-415a-951d-b5dc4b3decd7	JQ627262.1	93.258	93.258	93.258|93.258	1.1e-24	1.1e-24	1.1e-24|1.1e-24	89	89	89|89	15761	15761	15761|15761	576	576	576|576	Mammalia	Rodentia	Cricetidae	Oligoryzomys	Oligoryzomys flavescens
186193	2	ee382eeb-3d64-4d96-809c-944cbb1434ee	KJ530563.1	90.909	90.616	90.323|90.909	2.93e-24	4.52501e-19	2.93e-24|9.05e-19	110	101.5	93|110	2795	9470.5	2795|16146	16312	16312	16312|16312	Mammalia	Rodentia	Muridae	Mus	Mus fragilicauda
203824	1	be57e604-45fb-48c6-8500-8fdbe3855ffc	KJ868132.1	90.826	90.826	90.826|90.826	3.05e-23	3.05e-23	3.05e-23|3.05e-23	109	109	109|109	1926	1926	1926|1926	15490	15490	15490|15490	Mammalia	Notoryctemorphia	Notoryctidae	Notoryctes	Notoryctes caurinus
537921	1	f818182a-24ce-40c2-b0b3-5acd290608f9	MT381940.1	94.872	94.872	94.872|94.872	5.59e-23	5.59e-23	5.59e-23|5.59e-23	78	78	78|78	3504	3504	3504|3504	16350	16350	16350|16350	Mammalia	Rodentia	Cricetidae	Myodes	Myodes centralis
1477902	1	812d9148-2b83-40fe-9126-493c81723a65	MT381924.1	93.976	93.976	93.976|93.976	7.21e-23	7.21e-23	7.21e-23|7.21e-23	83	83	83|83	317	317	317|317	16403	16403	16403|16403	Mammalia	Rodentia	Cricetidae	Alticola	Alticola olchonensis
303926	1	756151c0-d1a0-4370-b08e-ddf36f719fed	MZ353591.1	93.75	93.75	93.75|93.75	1.63e-22	1.63e-22	1.63e-22|1.63e-22	80	80	80|80	2629	2629	2629|2629	16273	16273	16273|16273	Mammalia	Rodentia	Muridae	Lophuromys	Lophuromys melanonyx
398451	1	3e18d68e-6365-473f-a15c-b51a6e81e3fa	MN019571.1	90.265	90.265	90.265|90.265	1.79e-22	1.79e-22	1.79e-22|1.79e-22	113	113	113|113	756	756	756|756	1542	1542	1542|1542	Mammalia	Rodentia	Cricetidae	Oligoryzomys	Oligoryzomys moojeni
364283	1	8c4e6a01-f3bd-4792-992d-2f6e11e8d5ad	LC006055.1	92.405	92.405	92.405|92.405	1.44e-20	1.44e-20	1.44e-20|1.44e-20	79	79	79|79	3907	3907	3907|3907	15866	15866	15866|15866	Gastropoda	NA	Pleuroceridae	Koreoleptoxis	Koreoleptoxis globus (Martens, 1886)
186193	2	f7e3ddfc-e90c-4dab-96a4-d59759656f94	KJ530563.1	90.323	90.616	90.323|90.909	9.05e-19	4.52501e-19	2.93e-24|9.05e-19	93	101.5	93|110	16146	9470.5	2795|16146	16312	16312	16312|16312	Mammalia	Rodentia	Muridae	Mus	Mus fragilicauda
106343	1	31d0b32a-26e1-49e1-b7dc-6080a9f0d065	MZ159975.1	93.421	93.421	93.421|93.421	3.08e-18	3.08e-18	3.08e-18|3.08e-18	76	76	76|76	3640	3640	3640|3640	16310	16310	16310|16310	Mammalia	Rodentia	Muridae	Deomys	Deomys ferrugineus
10112	1	52114e54-e7dd-4a43-9bbc-06942a0be991	MG017593.1	90.217	90.217	90.217|90.217	5.59e-18	5.59e-18	5.59e-18|5.59e-18	92	92	92|92	1705	1705	1705|1705	16215	16215	16215|16215	Mammalia	Rodentia	Muridae	Mastomys	Mastomys natalensis
101697	1	45a7131c-4ef8-4bf6-8db8-d7863ee22d47	KJ489409.1	98.246	98.246	98.246|98.246	1.38e-17	1.38e-17	1.38e-17|1.38e-17	57	57	57|57	16206	16206	16206|16206	16247	16247	16247|16247	NA	Testudines	Testudinidae	Chelonoidis	Chelonoidis denticulatus
337583	1	be046813-8acd-4d7e-acf8-30b2cac05939	MN845675.1	91.566	91.566	91.566|91.566	3.05e-17	3.05e-17	3.05e-17|3.05e-17	83	83	83|83	2380	2380	2380|2380	9050	9050	9050|9050	Mammalia	Rodentia	Muridae	Hylomyscus	Hylomyscus baeri
121566	1	a4950aba-1bac-4ecd-888c-3fcb73cf71aa	NC_053799.1	94.118	94.118	94.118|94.118	1.41e-16	1.41e-16	1.41e-16|1.41e-16	68	68	68|68	742	742	742|742	16254	16254	16254|16254	Mammalia	Rodentia	Muridae	Lemniscomys	Lemniscomys rosalia
3029580	2	1c4a1996-f08c-446f-b331-c59e2008b105	OM809908.1	95.312	93.2055	91.099|95.312	1.7e-16	8.5e-17	8.1e-51|1.7e-16	64	127.5	64|191	13207	6987	767|13207	16048	16080.5	16048|16113	Mammalia	Rodentia	Cricetidae	Lasiopodomys	Lasiopodomys anglicus
175813	2	0c405ca0-9761-411b-8baf-6741896c1608	KJ868165.1	98.039	94.414	90.789|98.039	2.26e-15	5.663e-14	2.26e-15|1.11e-13	51	63.5	51|76	780	1623	780|2466	15360	15360	15360|15360	Mammalia	Diprotodontia	Phalangeridae	Wyulda	Wyulda squamicaudata
129247	2	f097d002-5597-405e-afaa-5bad61ab0ecf	KP694301.1	91.892	93.6205	91.892|95.349	6.35e-15	5.1e-08	6.35e-15|1.02e-07	74	58.5	43|74	2154	6518	2154|10882	16220	16220	16220|16220	Mammalia	Rodentia	Muridae	Apodemus	Apodemus draco
175813	2	52f975b0-b325-4fa1-9c90-aa46bfc61fa3	KJ868165.1	90.789	94.414	90.789|98.039	1.11e-13	5.663e-14	2.26e-15|1.11e-13	76	63.5	51|76	2466	1623	780|2466	15360	15360	15360|15360	Mammalia	Diprotodontia	Phalangeridae	Wyulda	Wyulda squamicaudata
56316	2	475a8391-5af6-4407-96db-927f88cc50e9	MZ433362.1	92.063	91.567	91.071|92.063	3.01e-12	5.50002e-07	3.01e-12|1.1e-06	63	59.5	56|63	310	1162.5	310|2015	16339	16339	16339|16339	Mammalia	Rodentia	Cricetidae	Peromyscus	Peromyscus boylii
45748	1	52330202-ae41-4c8a-b7c1-50f79c8b5719	MT362562.1	97.872	97.872	97.872|97.872	4.23e-12	4.23e-12	4.23e-12|4.23e-12	47	47	47|47	6185	6185	6185|6185	16356	16356	16356|16356	Gastropoda	Littorinimorpha	Littorinidae	Littorina	Littorina brevicula
9502	1	37e05b3c-021d-46fc-9ae1-177e489c0639	AF396459.1	92.857	92.857	92.857|92.857	2.81e-11	2.81e-11	2.81e-11|2.81e-11	56	56	56|56	10520	10520	10520|10520	690	690	690|690	Mammalia	Primates	Atelidae	Alouatta	Alouatta caraya
1936103	1	4df4417d-becf-4b38-b0b5-789b53ac9008	KY464174.1	90.278	90.278	90.278|90.278	1.87e-10	1.87e-10	1.87e-10|1.87e-10	72	72	72|72	4624	4624	4624|4624	16298	16298	16298|16298	Mammalia	Rodentia	Muridae	Sundamys	Sundamys infraluteus
407171	1	8457c79d-73cc-4780-898d-34cc3185e292	MT614214.1	100	100	100|100	7.62e-10	7.62e-10	7.62e-10|7.62e-10	37	37	37|37	1257	1257	1257|1257	16557	16557	16557|16557	Mammalia	Rodentia	Cricetidae	Lasiopodomys	Lasiopodomys brandtii
85047	1	dc1af0bb-e832-4abc-8966-3314166970eb	MG182016.1	90.625	90.625	90.625|90.625	1.84e-09	1.84e-09	1.84e-09|1.84e-09	64	64	64|64	789	789	789|789	16310	16310	16310|16310	Mammalia	Rodentia	Cricetidae	Neotoma	Neotoma magister
55557	1	1bb16a89-d637-4b6c-ae30-7da40836dee1	MW376912.1	90.476	90.476	90.476|90.476	2.25e-09	2.25e-09	2.25e-09|2.25e-09	63	63	63|63	14217	14217	14217|14217	16558	16558	16558|16558	Actinopteri	Gobiiformes	Gobiidae	Tridentiger	Tridentiger trigonocephalus
269649	1	cff865ef-6be4-44c6-97b5-5adf0e92e03b	MT381934.1	93.75	93.75	93.75|93.75	4.17e-09	4.17e-09	4.17e-09|4.17e-09	48	48	48|48	1754	1754	1754|1754	16296	16296	16296|16296	Mammalia	Rodentia	Cricetidae	Chionomys	Chionomys nivalis
129247	2	6600fdee-7f59-4647-8fae-ed8e9c4a45c4	KP694301.1	95.349	93.6205	91.892|95.349	1.02e-07	5.1e-08	6.35e-15|1.02e-07	43	58.5	43|74	10882	6518	2154|10882	16220	16220	16220|16220	Mammalia	Rodentia	Muridae	Apodemus	Apodemus draco
10041	2	da53a106-898a-420c-9e93-61e37c159dce	MG674647.1	97.436	96.337	95.238|97.436	1.11e-07	3.4905e-06	1.11e-07|6.87e-06	39	40.5	39|42	3055	7749	3055|12443	16322	16324	16322|16326	Mammalia	Rodentia	Cricetidae	Peromyscus	Peromyscus leucopus
452642	2	434fe3f1-58a9-4cfc-9f6a-a646e9940793	KY117556.1	95.238	95.812	95.238|96.386	1.2e-07	6e-08	2.01e-28|1.2e-07	42	62.5	42|83	3304	6708.5	3304|10113	16586	16586	16586|16586	Mammalia	Carnivora	Mustelidae	Lutra	Lutra sumatrana
9305	1	4e3b7c78-e65c-47a2-818a-116b13b6adf1	MG957426.1	93.333	93.333	93.333|93.333	2.62e-07	2.62e-07	2.62e-07|2.62e-07	45	45	45|45	1866	1866	1866|1866	16846	16846	16846|16846	Mammalia	Dasyuromorphia	Dasyuridae	Sarcophilus	Sarcophilus harrisii
1126389	1	e9676fa4-584c-4ea6-8c5d-073b3d3210a0	OU342870.1	97.436	97.436	97.436|97.436	3.14e-07	3.14e-07	3.14e-07|3.14e-07	39	39	39|39	8640	8640	8640|8640	27053	27053	27053|27053	Insecta	Hymenoptera	Crabronidae	Ectemnius	Ectemnius continuus
1792630	1	2bc00dfc-7127-4626-a39d-1e9b571d8f2f	KY123686.1	90.196	90.196	90.196|90.196	3.27e-07	3.27e-07	3.27e-07|3.27e-07	51	51	51|51	2321	2321	2321|2321	15974	15974	15974|15974	Insecta	Hemiptera	Cicadellidae	Durgades	Durgades nigropicta
447135	1	313bfae3-45b3-4d77-9359-96bc5734376b	KM892834.1	91.228	91.228	91.228|91.228	3.49e-07	3.49e-07	3.49e-07|3.49e-07	57	57	57|57	2480	2480	2480|2480	16354	16354	16354|16354	Mammalia	Rodentia	Cricetidae	Myodes	Myodes glareolus
34829	2	aee84c2b-cf16-4638-81fc-c886c41f0fca	NC_026098.1	90.385	90.385	90.385|90.385	5.53e-07	8.665e-07	5.53e-07|1.18e-06	52	52	52|52	3912	6121	3912|8330	17534	17534	17534|17534	Mammalia	Primates	Lemuridae	Eulemur	Eulemur rubriventer
226147	1	6cb1b0cc-c1fa-4c6b-abed-588427538203	OX337251.1	91.489	91.489	91.489|91.489	1.08e-06	1.08e-06	1.08e-06|1.08e-06	47	47	47|47	7627	7627	7627|7627	16206	16206	16206|16206	Insecta	Diptera	Syrphidae	Blera	Blera fallax
56316	2	5a3daaf9-87fb-4479-9a6c-9659f80d3d75	MZ433362.1	91.071	91.567	91.071|92.063	1.1e-06	5.50002e-07	3.01e-12|1.1e-06	56	59.5	56|63	2015	1162.5	310|2015	16339	16339	16339|16339	Mammalia	Rodentia	Cricetidae	Peromyscus	Peromyscus boylii
34829	2	f9d43959-5ddc-4a0d-9de5-422ae08425e3	NC_026098.1	90.385	90.385	90.385|90.385	1.18e-06	8.665e-07	5.53e-07|1.18e-06	52	52	52|52	8330	6121	3912|8330	17534	17534	17534|17534	Mammalia	Primates	Lemuridae	Eulemur	Eulemur rubriventer
2780040	1	8f2af1d0-25d4-4aaa-8709-00e2d0665722	MW136195.1	97.222	97.222	97.222|97.222	2.05e-06	2.05e-06	2.05e-06|2.05e-06	36	36	36|36	3720	3720	3720|3720	502	502	502|502	Palaeonemertea	Archinemertea	Cephalotrichidae	Cephalothrix	Cephalothrix cf. simula NEP-2020
122765	1	bff36292-dc9a-46ff-8fcb-51a7126a494e	AJ868099.1	97.143	97.143	97.143|97.143	3.95e-06	3.95e-06	3.95e-06|3.95e-06	35	35	35|35	490	490	490|490	1565	1565	1565|1565	Mammalia	Primates	Cercopithecidae	Trachypithecus	Trachypithecus cristatus
201358	1	3b26628f-6e8b-4b0d-be57-bf627d33b6e6	KX831093.1	97.297	97.297	97.297|97.297	6.56e-06	6.56e-06	6.56e-06|6.56e-06	37	37	37|37	11868	11868	11868|11868	17913	17913	17913|17913	Aves	Passeriformes	Timaliidae	Napothera	Napothera epilepidota
1658278	1	75fada70-9957-4011-8d6b-d2ca917b608a	MW136652.1	100	100	100|100	6.86e-06	6.86e-06	6.86e-06|6.86e-06	29	29	29|29	231	231	231|231	697	697	697|697	Amphibia	Anura	Bufonidae	Rhinella	Rhinella alata
10041	2	5d61c353-a3a1-4676-ba83-3c06aae840f9	BK010700.1	95.238	96.337	95.238|97.436	6.87e-06	3.4905e-06	1.11e-07|6.87e-06	42	40.5	39|42	12443	7749	3055|12443	16326	16324	16322|16326	Mammalia	Rodentia	Cricetidae	Peromyscus	Peromyscus leucopus
JFD1643
subject.tax.id	Count	query.acc.ver	subject.acc.ver	X..identity	Average.X..identity	X..identity.range	evalue	Average.evalue	evalue.range	alignment.length	Average.alignment.length	alignment.length.range	query.length	Average.query.length	query.length.range	subject.length	Average.subject.length	subject.length.range	class	order	family	genus	species
153286	6	894cdecf-b0ae-488d-b9ad-77efaeb02c6a	MF143495.1	93.323	92.9567	91.837|95.11	0	0	0|2.54e-141	4703	2419.5	392|6849	5811	2858.33	444|8153	17047	14313.7	647|17047	Mammalia	Chiroptera	Vespertilionidae	Myotis	Myotis nigricans
153286	6	b914de36-529b-44da-bcca-9357a7564651	MF143495.1	92.992	92.9567	91.837|95.11	0	0	0|2.54e-141	6849	2419.5	392|6849	8153	2858.33	444|8153	17047	14313.7	647|17047	Mammalia	Chiroptera	Vespertilionidae	Myotis	Myotis nigricans
153286	6	9d2d4fa4-d102-402b-a3f5-356d32d270f1	MF143495.1	92.391	92.9567	91.837|95.11	0	0	0|2.54e-141	736	2419.5	392|6849	768	2858.33	444|8153	17047	14313.7	647|17047	Mammalia	Chiroptera	Vespertilionidae	Myotis	Myotis nigricans
153286	6	0bac2810-dbd6-4ba7-9872-7288faa5e9c1	MF143495.1	92.087	92.9567	91.837|95.11	0	0	0|2.54e-141	1428	2419.5	392|6849	1407	2858.33	444|8153	17047	14313.7	647|17047	Mammalia	Chiroptera	Vespertilionidae	Myotis	Myotis nigricans
153286	6	4dbb6253-c83b-4f8d-809e-5b77a8ebea14	MF143495.1	95.11	92.9567	91.837|95.11	4.25e-175	0	0|2.54e-141	409	2419.5	392|6849	444	2858.33	444|8153	17047	14313.7	647|17047	Mammalia	Chiroptera	Vespertilionidae	Myotis	Myotis nigricans
153286	6	e31904f7-2f94-452f-9be9-d063a3c18550	MG191862.1	91.837	92.9567	91.837|95.11	2.54e-141	0	0|2.54e-141	392	2419.5	392|6849	567	2858.33	444|8153	647	14313.7	647|17047	Mammalia	Chiroptera	Vespertilionidae	Myotis	Myotis nigricans
605040	1	7712ac68-5a81-46b6-ab9c-3bb3fc68129f	BK012738.1	96.721	96.721	96.721|96.721	4.47e-19	4.47e-19	4.47e-19|4.47e-19	61	61	61|61	2066	2066	2066|2066	8860	8860	8860|8860	Insecta	Hymenoptera	Formicidae	Camponotus	Camponotus claviscapus
300245	1	ae24c1f2-ec06-46e1-99fa-967c52e71f70	MH286069.1	96.61	96.61	96.61|96.61	3.86e-16	3.86e-16	3.86e-16|3.86e-16	59	59	59|59	7687	7687	7687|7687	15390	15390	15390|15390	Insecta	Lepidoptera	Notodontidae	Clostera	Clostera anastomosis
2778961	1	79475cc6-49ec-4fe7-a0f6-76c5c70dfa78	MT810468.1	96.552	96.552	96.552|96.552	6.96e-16	6.96e-16	6.96e-16|6.96e-16	58	58	58|58	13840	13840	13840|13840	16945	16945	16945|16945	Lepidosauria	Squamata	Iguanidae	Liolaemus	Liolaemus millcayac
111132	2	af8d51ee-8184-4780-b61f-87e48c8957a8	KY962393.1	96.429	98.2145	96.429|100	4.86e-15	4.695e-08	4.86e-15|9.39e-08	56	45.5	35|56	6377	8218	6377|10059	17702	17702	17702|17702	Amphibia	Anura	Dendrobatidae	Phyllobates	Phyllobates terribilis
2994838	1	f85f94c0-36cd-4507-b409-da4caa629b6e	ON023263.1	94.643	94.643	94.643|94.643	7.38e-12	7.38e-12	7.38e-12|7.38e-12	56	56	56|56	10770	10770	10770|10770	18970	18970	18970|18970	Bivalvia	Solemyida	Solemyidae	Acharax	Acharax sp. NY-2022
1704320	1	d44b7afa-de12-4b5a-a19e-29b16878a821	ON783026.1	97.727	97.727	97.727|97.727	1.63e-10	1.63e-10	1.63e-10|1.63e-10	44	44	44|44	15641	15641	15641|15641	15464	15464	15464|15464	Insecta	Lepidoptera	Riodinidae	Abisara	Abisara fylla
2820092	2	522733be-886e-4349-8459-de82266d436b	MW281861.1	97.561	97.429	97.297|97.561	4.26e-09	1.95713e-06	4.26e-09|3.91e-06	41	39	37|41	6934	7010	6934|7086	15922	15922	15922|15922	Insecta	Hemiptera	Caliscelidae	Youtuus	Youtuus erythrus
1038984	2	f4a395cf-c355-4ebf-931a-cf2f018142e3	MT780494.1	94	93.591	93.182|94	6.1e-09	3.89805e-06	6.1e-09|7.79e-06	50	47	44|50	9921	6777.5	3634|9921	17352	17352	17352|17352	Insecta	Hymenoptera	Halictidae	Lasioglossum	Lasioglossum affine
2491155	1	133e0c1c-42e1-43bd-9061-b4824b00e634	MG923491.1	93.617	93.617	93.617|93.617	1.24e-08	1.24e-08	1.24e-08|1.24e-08	47	47	47|47	5168	5168	5168|5168	17411	17411	17411|17411	Insecta	Hymenoptera	Diapriidae	NA	Diapriidae sp. ZJUH_2016010
2030379	1	cd29ae15-4096-48f6-8eb1-ab422aea4264	MF410811.1	100	100	100|100	7.43e-08	7.43e-08	7.43e-08|7.43e-08	35	35	35|35	7967	7967	7967|7967	8235	8235	8235|8235	Insecta	Diptera	NA	NA	Diptera sp. 98 LC-2017
111132	2	3bd8cda9-cfa3-4890-9967-014e7b09a210	KY962393.1	100	98.2145	96.429|100	9.39e-08	4.695e-08	4.86e-15|9.39e-08	35	45.5	35|56	10059	8218	6377|10059	17702	17702	17702|17702	Amphibia	Anura	Dendrobatidae	Phyllobates	Phyllobates terribilis
2562751	1	7093bd9d-d2ca-4031-8559-9d67d05c86d8	MK119125.2	90	90	90|90	4.19e-07	4.19e-07	4.19e-07|4.19e-07	50	50	50|50	11526	11526	11526|11526	2623	2623	2623|2623	Insecta	Hymenoptera	Pteromalidae	Philotrypesis	Philotrypesis sp. TL-2019
3026466	1	dc254589-98f0-4be8-a0e5-fb71bd9fee85	OP921089.1	100	100	100|100	8.3e-07	8.3e-07	8.3e-07|8.3e-07	33	33	33|33	5857	5857	5857|5857	17205	17205	17205|17205	Insecta	Trichoptera	Pisuliidae	Silvatares	Silvatares holzenthali
52105	1	a44d9e8a-08c6-4f36-a06b-a490a4a5104b	MH404043.1	93.023	93.023	93.023|93.023	9.83e-07	9.83e-07	9.83e-07|9.83e-07	43	43	43|43	1798	1798	1798|1798	1971	1971	1971|1971	Amphibia	Caudata	Plethodontidae	Desmognathus	Desmognathus quadramaculatus
2030382	1	8bdec595-93a0-472a-9824-38ca009b370d	MF410990.1	97.297	97.297	97.297|97.297	1.9e-06	1.9e-06	1.9e-06|1.9e-06	37	37	37|37	3457	3457	3457|3457	16123	16123	16123|16123	Insecta	Diptera	Dolichopodidae	NA	Dolichopodidae sp. LC-2017
2820092	2	e89d4d2a-e69c-4085-8318-361fc1ad56f9	MW281861.1	97.297	97.429	97.297|97.561	3.91e-06	1.95713e-06	4.26e-09|3.91e-06	37	39	37|41	7086	7010	6934|7086	15922	15922	15922|15922	Insecta	Hemiptera	Caliscelidae	Youtuus	Youtuus erythrus
1038984	2	71c6c8a0-f050-4b02-9b92-a91fc46e2a51	MT780494.1	93.182	93.591	93.182|94	7.79e-06	3.89805e-06	6.1e-09|7.79e-06	44	47	44|50	3634	6777.5	3634|9921	17352	17352	17352|17352	Insecta	Hymenoptera	Halictidae	Lasioglossum	Lasioglossum affine
JFD1633
subject.tax.id	Count	query.acc.ver	subject.acc.ver	X..identity	Average.X..identity	X..identity.range	evalue	Average.evalue	evalue.range	alignment.length	Average.alignment.length	alignment.length.range	query.length	Average.query.length	query.length.range	subject.length	Average.subject.length	subject.length.range	class	order	family	genus	species
2964401	7	7ad07522-38a3-4ddd-90be-87d9b2d95e8e	MZ364464.1	93.478	92.2603	90.318|94.49	0	0	0|2.23e-149	552	572.714	363|667	1578	4909.71	913|9808	544	592.857	544|658	Mammalia	Rodentia	Cricetidae	Nephelomys	Nephelomys childi
2964401	7	9329f288-f23c-4b4b-afe7-01b9412adf61	MZ364464.1	93.345	92.2603	90.318|94.49	0	0	0|2.23e-149	556	572.714	363|667	5945	4909.71	913|9808	544	592.857	544|658	Mammalia	Rodentia	Cricetidae	Nephelomys	Nephelomys childi
2964401	7	a4fa5508-77a1-4f1c-998d-9c5d040da6ad	MZ364420.1	92	92.2603	90.318|94.49	0	0	0|2.23e-149	650	572.714	363|667	7013	4909.71	913|9808	658	592.857	544|658	Mammalia	Rodentia	Cricetidae	Nephelomys	Nephelomys childi
2964401	7	67c66081-b4c7-49c7-bd77-d31817632a20	MZ364464.1	91.786	92.2603	90.318|94.49	0	0	0|2.23e-149	560	572.714	363|667	9808	4909.71	913|9808	544	592.857	544|658	Mammalia	Rodentia	Cricetidae	Nephelomys	Nephelomys childi
1734924	2	09b944c3-94d5-4b82-a09c-939ec30e8651	MN547686.1	91.652	91.524	91.396|91.652	0	0	0|2.88e-170	1102	812.5	523|1102	8929	4746	563|8929	1149	1149	1149|1149	Mammalia	Rodentia	Cricetidae	Nephelomys	Nephelomys devius
2964401	7	9ae3892c-970e-49a2-b1c4-ba519c4ae4cc	MZ364421.1	90.405	92.2603	90.318|94.49	0	0	0|2.23e-149	667	572.714	363|667	6577	4909.71	913|9808	658	592.857	544|658	Mammalia	Rodentia	Cricetidae	Nephelomys	Nephelomys childi
2964401	7	796aa078-bab6-4d62-b176-ab54534d67ac	MZ364420.1	90.318	92.2603	90.318|94.49	0	0	0|2.23e-149	661	572.714	363|667	2534	4909.71	913|9808	658	592.857	544|658	Mammalia	Rodentia	Cricetidae	Nephelomys	Nephelomys childi
1734924	2	2ea1b01d-a411-415b-8a03-2191d25d1337	MN547700.1	91.396	91.524	91.396|91.652	2.88e-170	0	0|2.88e-170	523	812.5	523|1102	563	4746	563|8929	1149	1149	1149|1149	Mammalia	Rodentia	Cricetidae	Nephelomys	Nephelomys devius
2964401	7	bb7a46bc-2c64-4738-8b17-f90baed517f4	MZ364464.1	94.49	92.2603	90.318|94.49	2.23e-149	0	0|2.23e-149	363	572.714	363|667	913	4909.71	913|9808	544	592.857	544|658	Mammalia	Rodentia	Cricetidae	Nephelomys	Nephelomys childi
530178	1	4b90e655-5ed3-4cbe-babc-8ad31637101a	JF693848.1	92.092	92.092	92.092|92.092	3.66e-141	0	3.66e-141|3.66e-141	392	392	392|392	11953	11953	11953|11953	384	384	384|384	Mammalia	Rodentia	Cricetidae	Nephelomys	Nephelomys albigularis
42415	1	a9517249-296e-4854-863b-faf15dd36b81	KY707311.1	93.284	93.284	93.284|93.284	5.53e-96	5.53e-96	5.53e-96|5.53e-96	268	268	268|268	6002	6002	6002|6002	16394	16394	16394|16394	Mammalia	Rodentia	Cricetidae	Sigmodon	Sigmodon hispidus
200942	1	5a878b83-4d5b-4be5-8297-1f5f0ae9392a	KX381536.1	90.365	90.365	90.365|90.365	1.28e-89	1.28e-89	1.28e-89|1.28e-89	301	301	301|301	1151	1151	1151|1151	336	336	336|336	Mammalia	Rodentia	Cricetidae	Oecomys	Oecomys rutilus
249018	2	28d00c34-2650-42ab-bbab-a0928785fdfb	AY395852.1	90.378	91.548	90.378|92.718	2.68e-86	3.67e-75	2.68e-86|7.33e-75	291	248.5	206|291	5938	4224	2510|5938	2594	9585.5	2594|16577	Mammalia	Chiroptera	Emballonuridae	Saccopteryx	Saccopteryx leptura
148086	1	1bac835c-3da6-46d5-b662-3a33ad94808d	KU743905.1	92.213	92.213	92.213|92.213	7.37e-84	7.37e-84	7.37e-84|7.37e-84	244	244	244|244	1831	1831	1831|1831	16707	16707	16707|16707	Mammalia	Chiroptera	Phyllostomidae	Chrotopterus	Chrotopterus auritus
249018	2	9242a56a-241e-4db4-af98-2d4846e11a13	KY681816.1	92.718	91.548	90.378|92.718	7.33e-75	3.67e-75	2.68e-86|7.33e-75	206	248.5	206|291	2510	4224	2510|5938	16577	9585.5	2594|16577	Mammalia	Chiroptera	Emballonuridae	Saccopteryx	Saccopteryx leptura
58087	1	19612c80-5c4f-40dd-82c7-3301182fc45b	KC747670.1	90.123	90.123	90.123|90.123	1.81e-71	1.81e-71	1.81e-71|1.81e-71	243	243	243|243	6863	6863	6863|6863	2430	2430	2430|2430	Mammalia	Chiroptera	Pteropodidae	Thoopterus	Thoopterus nigrescens
89098	1	99217aa3-8357-4bdd-9156-9526c87a2b9a	OL685394.1	90.179	90.179	90.179|90.179	2.64e-62	2.64e-62	2.64e-62|2.64e-62	224	224	224|224	426	426	426|426	16358	16358	16358|16358	Mammalia	Rodentia	Cricetidae	Holochilus	Holochilus sciureus
249017	1	31169322-aea0-4024-b128-d4f3808288c3	AY395851.1	91.111	91.111	91.111|91.111	5.17e-58	5.17e-58	5.17e-58|5.17e-58	180	180	180|180	352	352	352|352	2587	2587	2587|2587	Mammalia	Chiroptera	Emballonuridae	Rhynchonycteris	Rhynchonycteris naso
472713	1	f05da463-322a-4a89-b6ea-0b7ba1fb34b2	KY464169.1	92.453	92.453	92.453|92.453	2.76e-49	2.76e-49	2.76e-49|2.76e-49	159	159	159|159	1691	1691	1691|1691	16297	16297	16297|16297	NA	NA	NA	NA	NA
218826	2	89bc835a-f692-47d7-9d81-9f435e3f6083	MF696155.1	90.476	90.6925	90.476|90.909	1.31e-43	1.85e-36	1.31e-43|3.69e-36	168	155.5	143|168	14962	8627.5	2293|14962	16314	16314	16314|16314	Mammalia	Rodentia	Cricetidae	Oligoryzomys	Oligoryzomys stramineus
608660	1	8b27dc0e-895c-47f0-8d38-9f0cee0575d9	KT779432.1	91.241	91.241	91.241|91.241	2.85e-38	2.85e-38	2.85e-38|2.85e-38	137	137	137|137	2343	2343	2343|2343	16804	16804	16804|16804	Mammalia	Chiroptera	Rhinolophidae	Rhinolophus	Rhinolophus ferrumequinum
375553	1	89d3ee65-2824-4650-a9e9-bb8b17c464c3	MG603757.1	97.778	97.778	97.778|97.778	1.95e-37	1.95e-37	1.95e-37|1.95e-37	90	90	90|90	15912	15912	15912|15912	17494	17494	17494|17494	Mammalia	Chiroptera	Vespertilionidae	Nyctalus	Nyctalus plancyi
218826	2	5729e30a-5d63-45ff-a1c1-dab7d16205dd	MF696155.1	90.909	90.6925	90.476|90.909	3.69e-36	1.85e-36	1.31e-43|3.69e-36	143	155.5	143|168	2293	8627.5	2293|14962	16314	16314	16314|16314	Mammalia	Rodentia	Cricetidae	Oligoryzomys	Oligoryzomys stramineus
106343	1	063337eb-1dfa-42a9-bc38-a8ddc2dbf50c	MZ159975.1	94.286	94.286	94.286|94.286	2.43e-32	2.43e-32	2.43e-32|2.43e-32	105	105	105|105	1117	1117	1117|1117	16310	16310	16310|16310	Mammalia	Rodentia	Muridae	Deomys	Deomys ferrugineus
143302	1	b615e27b-9fbc-4aba-90c8-b1a71a37f6ac	KU144678.1	100	100	100|100	5.85e-32	5.85e-32	5.85e-32|5.85e-32	76	76	76|76	10300	10300	10300|10300	16709	16709	16709|16709	Mammalia	Eulipotyphla	Talpidae	Condylura	Condylura cristata
1330375	1	f806eadc-35e3-4453-8b5c-8f77000990de	KY464167.1	94.118	94.118	94.118|94.118	8.42e-31	8.42e-31	8.42e-31|8.42e-31	102	102	102|102	2525	2525	2525|2525	16308	16308	16308|16308	Mammalia	Rodentia	Muridae	Bunomys	Bunomys penitus
530184	1	00fb5075-6fce-4698-bc9d-4a59080f19d5	MZ364477.1	91.27	91.27	91.27|91.27	3.22e-30	3.22e-30	3.22e-30|3.22e-30	126	126	126|126	9602	9602	9602|9602	546	546	546|546	Mammalia	Rodentia	Cricetidae	Transandinomys	Transandinomys talamancae
867892	1	b4af4567-2c07-44dc-a47f-4c0149c29e94	MK987183.1	90.152	90.152	90.152|90.152	3.38e-30	3.38e-30	3.38e-30|3.38e-30	132	132	132|132	5804	5804	5804|5804	16846	16846	16846|16846	Mammalia	Chiroptera	Rhinolophidae	Rhinolophus	Rhinolophus siamensis
9430	1	ead14dfa-d0a3-401f-a26d-c5f27e9d6d80	ON527786.1	93.407	93.407	93.407|93.407	1.79e-29	1.79e-29	1.79e-29|1.79e-29	91	91	91|91	537	537	537|537	16668	16668	16668|16668	Mammalia	Chiroptera	Phyllostomidae	Desmodus	Desmodus rotundus
249003	1	708c25bb-3105-4e38-b507-84160d733e7b	NC_065683.1	94.186	94.186	94.186|94.186	7.04e-27	7.04e-27	7.04e-27|7.04e-27	86	86	86|86	244	244	244|244	16585	16585	16585|16585	Mammalia	Chiroptera	Phyllostomidae	Choeroniscus	Choeroniscus minor
27642	1	fa810c43-24a4-4d17-aee0-c360945dfaf4	AY395835.1	90.654	90.654	90.654|90.654	7.29e-27	7.29e-27	7.29e-27|7.29e-27	107	107	107|107	13923	13923	13923|13923	2599	2599	2599|2599	Mammalia	Chiroptera	Phyllostomidae	Anoura	Anoura caudifer
2006243	1	675f7078-f006-4387-afc0-cb8c31ae13bc	KY428341.1	90.909	90.909	90.909|90.909	1.18e-24	1.18e-24	1.18e-24|1.18e-24	110	110	110|110	4383	4383	4383|4383	1430	1430	1430|1430	Insecta	Diptera	Tephritidae	Anastrepha	Anastrepha hamadryas
34858	1	e7af917b-2482-45b6-890c-b669bb943f35	MN845648.1	92.784	92.784	92.784|92.784	1.27e-24	1.27e-24	1.27e-24|1.27e-24	97	97	97|97	4716	4716	4716|4716	16253	16253	16253|16253	Mammalia	Rodentia	Muridae	Hylomyscus	Hylomyscus alleni
77237	1	ade40db1-be42-42df-af63-2397c1ae9e2d	MN816336.1	95.89	95.89	95.89|95.89	2.77e-24	2.77e-24	2.77e-24|2.77e-24	73	73	73|73	5895	5895	5895|5895	16814	16814	16814|16814	Mammalia	Chiroptera	Pteropodidae	Myonycteris	Myonycteris brachycephala
2713771	1	766e3397-faef-4527-8e10-f46496fb151c	MW232479.1	97.059	97.059	97.059|97.059	6.28e-23	6.28e-23	6.28e-23|6.28e-23	68	68	68|68	279	279	279|279	16538	16538	16538|16538	Actinopteri	Cypriniformes	Danionidae	Rasbora	Rasbora subtilis
124747	1	4dce36a3-d672-495b-a673-0b3bfefcdee6	AF263214.1	96.774	96.774	96.774|96.774	2.82e-22	2.82e-22	2.82e-22|2.82e-22	62	62	62|62	685	685	685|685	2625	2625	2625|2625	Mammalia	Chiroptera	Molossidae	Eumops	Eumops auripendulus
1167681	1	7dc8495d-0896-456b-9578-2165e234afa2	MF537346.1	94.444	94.444	94.444|94.444	9.68e-20	9.68e-20	9.68e-20|9.68e-20	72	72	72|72	15105	15105	15105|15105	653	653	653|653	Mammalia	Chiroptera	Vespertilionidae	Murina	Murina jaintiana
999941	1	76073a00-979c-47c3-a8b8-bfbf96664737	NC_065675.1	91.566	91.566	91.566|91.566	1.9e-19	1.9e-19	1.9e-19|1.9e-19	83	83	83|83	1966	1966	1966|1966	16507	16507	16507|16507	Mammalia	Chiroptera	Phyllostomidae	Anoura	Anoura cultrata
9689	1	6b626b12-5a26-4a86-9f8a-0ee29b03dd4d	MW987613.1	98.276	98.276	98.276|98.276	1.08e-18	1.08e-18	1.08e-18|1.08e-18	58	58	58|58	4946	4946	4946|4946	978	978	978|978	Mammalia	Carnivora	Felidae	Panthera	Panthera leo
543379	1	eaa83dfe-acdd-4c57-9119-f6384391edb4	MT611423.1	100	100	100|100	7.73e-18	7.73e-18	7.73e-18|7.73e-18	52	52	52|52	9104	9104	9104|9104	15042	15042	15042|15042	Insecta	Hymenoptera	Pteromalidae	Trichomalopsis	Trichomalopsis sarcophagae
170209	1	4b534294-aa0c-4504-ad32-718188432455	MN816342.1	92	92	92|92	9.02e-18	9.02e-18	9.02e-18|9.02e-18	75	75	75|75	418	418	418|418	16702	16702	16702|16702	Mammalia	Chiroptera	Pteropodidae	Nyctimene	Nyctimene cephalotes
128105	1	6881d824-ef13-410d-a242-a918c95e40a3	KX688181.1	91.667	91.667	91.667|91.667	1.73e-17	1.73e-17	1.73e-17|1.73e-17	84	84	84|84	5230	5230	5230|5230	16823	16823	16823|16823	Mammalia	Rodentia	Echimyidae	Proechimys	Proechimys guyannensis
111840	1	59c1ab97-76b4-4b28-a6d2-a39b9d07e851	MT381944.1	92.405	92.405	92.405|92.405	2.1e-17	2.1e-17	2.1e-17|2.1e-17	79	79	79|79	1647	1647	1647|1647	16286	16286	16286|16286	Mammalia	Rodentia	Cricetidae	Microtus	Microtus richardsoni
175524	1	d9a38f93-cb73-4825-9533-f6ead93db558	OK274262.1	90.698	90.698	90.698|90.698	1.85e-16	1.85e-16	1.85e-16|1.85e-16	86	86	86|86	8248	8248	8248|8248	16797	16797	16797|16797	Mammalia	Chiroptera	Hipposideridae	Hipposideros	Hipposideros larvatus
59477	1	76423c1e-81a1-46c4-be59-8de3e1746af6	NC_053269.1	93.75	93.75	93.75|93.75	2.34e-16	2.34e-16	2.34e-16|2.34e-16	64	64	64|64	703	703	703|703	16886	16886	16886|16886	Mammalia	Chiroptera	Rhinolophidae	Rhinolophus	Rhinolophus affinis
1086267	1	e1879308-d622-44b0-a6f6-c5a0445eb215	MZ343807.1	96.364	96.364	96.364|96.364	1.31e-15	1.31e-15	1.31e-15|1.31e-15	55	55	55|55	1732	1732	1732|1732	15939	15939	15939|15939	Insecta	Lepidoptera	Sphingidae	Dahira	Dahira obliquifascia
203824	1	e5cfc8ee-46ed-4de7-af08-4b938c61deb8	KJ868132.1	92.958	92.958	92.958|92.958	6.08e-15	6.08e-15	6.08e-15|6.08e-15	71	71	71|71	7968	7968	7968|7968	15490	15490	15490|15490	Mammalia	Notoryctemorphia	Notoryctidae	Notoryctes	Notoryctes caurinus
124749	1	cd31050c-66bb-41f6-904f-5c2b6d303dd4	MN885881.1	90	90	90|90	1.01e-14	1.01e-14	1.01e-14|1.01e-14	80	80	80|80	7609	7609	7609|7609	16446	16446	16446|16446	Mammalia	Chiroptera	Vespertilionidae	Harpiocephalus	Harpiocephalus harpia
142658	1	b7c2a85f-570e-40e9-a1a9-2e9852352117	KF422893.1	96.364	96.364	96.364|96.364	1.19e-14	1.19e-14	1.19e-14|1.19e-14	55	55	55|55	1046	1046	1046|1046	16699	16699	16699|16699	Aves	Galliformes	Phasianidae	Polyplectron	Polyplectron germaini
867831	1	18e16897-1fe0-4518-b212-abcbf70a0d31	MZ196220.1	94.828	94.828	94.828|94.828	2.15e-14	2.15e-14	2.15e-14|2.15e-14	58	58	58|58	16243	16243	16243|16243	16820	16820	16820|16820	Mammalia	Chiroptera	Hipposideridae	Hipposideros	Hipposideros pendleburyi
59483	1	e01ecdf4-8e65-40c8-9a84-588ef171394a	KY581661.1	92.308	92.308	92.308|92.308	2.86e-14	2.86e-14	2.86e-14|2.86e-14	65	65	65|65	1436	1436	1436|1436	16869	16869	16869|16869	Mammalia	Chiroptera	Molossidae	Tadarida	Tadarida teniotis
51338	1	4947e2d3-68bc-45e8-8e0a-5547fb823f28	KY311838.1	96.364	96.364	96.364|96.364	4.52e-14	4.52e-14	4.52e-14|4.52e-14	55	55	55|55	3911	3911	3911|3911	16767	16767	16767|16767	Mammalia	Rodentia	Castoridae	Castor	Castor canadensis
27629	1	8bd3b681-88f2-44b6-8d63-d40707d5d1fa	AF263218.1	91.176	91.176	91.176|91.176	1.54e-13	1.54e-13	1.54e-13|1.54e-13	68	68	68|68	7638	7638	7638|7638	2622	2622	2622|2622	Mammalia	Chiroptera	Molossidae	Promops	Promops centralis
9419	1	4c51894d-a8ba-495b-aa8f-bc45b1927dd6	KU743909.1	94.34	94.34	94.34|94.34	2.47e-12	2.47e-12	2.47e-12|2.47e-12	53	53	53|53	2089	2089	2089|2089	16691	16691	16691|16691	Mammalia	Chiroptera	Phyllostomidae	Macrotus	Macrotus californicus
463807	1	9fcbc1ea-be6e-49b7-bc49-38a9dcef2ccd	MK410381.1	95.833	95.833	95.833|95.833	2.74e-12	2.74e-12	2.74e-12|2.74e-12	48	48	48|48	2318	2318	2318|2318	1545	1545	1545|1545	Mammalia	Chiroptera	Emballonuridae	Taphozous	Taphozous longimanus
148064	1	b16891d9-5013-4d6e-9231-72db2af82edd	KU743912.1	95.455	95.455	95.455|95.455	1.22e-11	1.22e-11	1.22e-11|1.22e-11	44	44	44|44	2640	2640	2640|2640	16655	16655	16655|16655	Mammalia	Chiroptera	Phyllostomidae	Glyphonycteris	Glyphonycteris daviesi
326083	1	f3e7b3be-67ad-4a91-9682-84fc9a44f305	OK274264.1	91.045	91.045	91.045|91.045	3.04e-11	3.04e-11	3.04e-11|3.04e-11	67	67	67|67	6557	6557	6557|6557	16433	16433	16433|16433	Mammalia	Chiroptera	Pteropodidae	Macroglossus	Macroglossus sobrinus
7493	1	e26f28f3-fe39-4fa5-9b42-b14902a5ff35	ON209198.1	95.918	95.918	95.918|95.918	3.54e-11	3.54e-11	3.54e-11|3.54e-11	49	49	49|49	13258	13258	13258|13258	16227	16227	16227|16227	Insecta	Hymenoptera	Trichogrammatidae	Trichogramma	Trichogramma pretiosum
170233	1	b4ee10b1-c7a3-40fd-b452-cf0cf5eab989	OK274259.1	90.141	90.141	90.141|90.141	4.78e-11	4.78e-11	4.78e-11|4.78e-11	71	71	71|71	10311	10311	10311|10311	16648	16648	16648|16648	Mammalia	Chiroptera	Hipposideridae	Hipposideros	Hipposideros cervinus
526407	1	88633ee6-9064-488b-89b1-ef444cba1e82	NC_056773.1	97.368	97.368	97.368|97.368	5.49e-09	5.49e-09	5.49e-09|5.49e-09	38	38	38|38	5143	5143	5143|5143	17299	17299	17299|17299	Mammalia	Chiroptera	Vespertilionidae	Myotis	Myotis petax
322709	1	3a5d8c5d-0523-43a1-a012-fc5b94c7fb12	KY707305.1	93.617	93.617	93.617|93.617	3.09e-08	3.09e-08	3.09e-08|3.09e-08	47	47	47|47	869	869	869|869	16821	16821	16821|16821	Mammalia	Rodentia	Cricetidae	Peromyscus	Peromyscus megalops
479477	1	57a38bb1-06db-4d1d-8796-6d5a31a544c5	MK987180.1	95.238	95.238	95.238|95.238	5.61e-08	5.61e-08	5.61e-08|5.61e-08	42	42	42|42	13484	13484	13484|13484	16811	16811	16811|16811	Mammalia	Chiroptera	Rhinolophidae	Rhinolophus	Rhinolophus paradoxolophus
27620	1	c7084e01-33d0-4de8-bbc1-0734c8907ce8	KT000577.1	91.667	91.667	91.667|91.667	7.01e-08	7.01e-08	7.01e-08|7.01e-08	48	48	48|48	4330	4330	4330|4330	527	527	527|527	Mammalia	Chiroptera	Molossidae	Eumops	Eumops perotis
187012	1	c4fdfdc8-a205-44ec-8251-3bc98b0b2e56	MH177276.1	97.143	97.143	97.143|97.143	2.08e-07	2.08e-07	2.08e-07|2.08e-07	35	35	35|35	3294	3294	3294|3294	17089	17089	17089|17089	Mammalia	Chiroptera	Vespertilionidae	Myotis	Myotis frater
504099	1	eb11519a-b1a2-43b9-b356-1123f2b4bd8a	KT834971.1	91.228	91.228	91.228|91.228	3.74e-07	3.74e-07	3.74e-07|3.74e-07	57	57	57|57	2650	2650	2650|2650	16393	16393	16393|16393	Mammalia	Rodentia	Muridae	Meriones	Meriones tamariscinus
925982	1	ceb97aa0-1760-44db-ae18-a8cf5819be46	MF381659.1	97.143	97.143	97.143|97.143	5.56e-07	5.56e-07	5.56e-07|5.56e-07	35	35	35|35	279	279	279|279	15471	15471	15471|15471	Insecta	Diptera	Culicidae	Anopheles	Anopheles nimbus
77223	1	b4d26c36-d87e-400a-b290-4e48ffbdee8e	MN816356.1	94.737	94.737	94.737|94.737	7.85e-07	7.85e-07	7.85e-07|7.85e-07	38	38	38|38	834	834	834|834	16777	16777	16777|16777	Mammalia	Chiroptera	Pteropodidae	Rousettus	Rousettus madagascariensis
187021	1	0c646b1a-fe34-49be-bb7f-51b38354f746	JX872285.1	97.059	97.059	97.059|97.059	9.77e-07	9.77e-07	9.77e-07|9.77e-07	34	34	34|34	3974	3974	3974|3974	17285	17285	17285|17285	Mammalia	Chiroptera	Vespertilionidae	Murina	Murina ussuriensis
662898	1	59d49d4f-5d6b-4421-a817-d6c0b207ecdf	MN816364.1	97.059	97.059	97.059|97.059	1.52e-06	1.52e-06	1.52e-06|1.52e-06	34	34	34|34	6177	6177	6177|6177	16776	16776	16776|16776	Mammalia	Chiroptera	Pteropodidae	Sphaerias	Sphaerias blanfordi
138707	1	b8d33e87-8221-4f8c-8c15-957f777dc1f8	HG003313.1	91.489	91.489	91.489|91.489	2.79e-06	2.79e-06	2.79e-06|2.79e-06	47	47	47|47	2917	2917	2917|2917	16671	16671	16671|16671	Mammalia	Chiroptera	Phyllostomidae	Rhinophylla	Rhinophylla pumilio
987909	1	317fa706-5e73-4e97-b4fd-6f13cee33110	OX276372.1	91.304	91.304	91.304|91.304	8.67e-06	8.67e-06	8.67e-06|8.67e-06	46	46	46|46	15686	15686	15686|15686	15390	15390	15390|15390	Insecta	Lepidoptera	Noctuidae	Cosmia	Cosmia pyralina
JFD1636
subject.tax.id	Count	query.acc.ver	subject.acc.ver	X..identity	Average.X..identity	X..identity.range	evalue	Average.evalue	evalue.range	alignment.length	Average.alignment.length	alignment.length.range	query.length	Average.query.length	query.length.range	subject.length	Average.subject.length	subject.length.range	class	order	family	genus	species
124751	6	271d35c9-2c49-4a71-abd0-eca4afde8094	AF263216.1	94.665	93.6112	90.984|94.706	0	4.41667e-32	0|2.65e-31	2624	989.333	122|2624	4975	5906.83	1711|14732	2613	1550.5	657|2613	Mammalia	Chiroptera	Molossidae	Molossus	Molossus rufus
124751	6	3d0ad7de-f524-43b3-8602-a23ffb4b442c	MH058086.1	94.372	93.6112	90.984|94.706	0	4.41667e-32	0|2.65e-31	693	989.333	122|2624	2319	5906.83	1711|14732	1140	1550.5	657|2613	Mammalia	Chiroptera	Molossidae	Molossus	Molossus rufus
124751	6	ba242233-3699-4d81-b116-b90c0437f037	MH058086.1	93.869	93.6112	90.984|94.706	0	4.41667e-32	0|2.65e-31	1158	989.333	122|2624	14732	5906.83	1711|14732	1140	1550.5	657|2613	Mammalia	Chiroptera	Molossidae	Molossus	Molossus rufus
2801928	1	902dcf38-c9c3-435e-8f88-76c2515cfa5f	MT262835.1	93.396	93.396	93.396|93.396	0	0	0|0	636	636	636|636	3657	3657	3657|3657	1114	1114	1114|1114	Mammalia	Chiroptera	Molossidae	Molossus	Molossus sp. Santa Fe177
124751	6	0b31e3bb-69b3-4701-8f67-c8a604c4403f	MH058086.1	93.071	93.6112	90.984|94.706	0	4.41667e-32	0|2.65e-31	1169	989.333	122|2624	4808	5906.83	1711|14732	1140	1550.5	657|2613	Mammalia	Chiroptera	Molossidae	Molossus	Molossus rufus
999942	1	889ae9e1-88b3-4639-a2c3-2ecebf93606c	KT721460.1	91.71	91.71	91.71|91.71	0	0	0|0	579	579	579|579	6875	6875	6875|6875	615	615	615|615	Mammalia	Chiroptera	Molossidae	Molossus	Molossus coibensis
124759	1	a7212461-cd2a-4a5c-a917-f9b404ca5052	JF444948.1	97.119	97.119	97.119|97.119	2.64e-115	0	2.64e-115|2.64e-115	243	243	243|243	352	352	352|352	657	657	657|657	Mammalia	Chiroptera	Thyropteridae	Thyroptera	Thyroptera tricolor
124751	6	546c7016-3ec3-4cdd-b822-08fd546d9df1	MH185178.1	94.706	93.6112	90.984|94.706	9.25e-67	4.41667e-32	0|2.65e-31	170	989.333	122|2624	1711	5906.83	1711|14732	657	1550.5	657|2613	Mammalia	Chiroptera	Molossidae	Molossus	Molossus rufus
124751	6	c3c49c33-9da1-4270-97eb-44e1a7702f34	AF263216.1	90.984	93.6112	90.984|94.706	2.65e-31	4.41667e-32	0|2.65e-31	122	989.333	122|2624	6896	5906.83	1711|14732	2613	1550.5	657|2613	Mammalia	Chiroptera	Molossidae	Molossus	Molossus rufus
59483	4	8b335267-32a7-4a4f-ac69-3984cae9ff45	KY581661.1	92.391	92.8835	90.566|96.774	5e-25	1.57002e-06	5e-25|6.28e-06	92	67	53|92	16155	13223	6556|16155	16869	16869	16869|16869	Mammalia	Chiroptera	Molossidae	Tadarida	Tadarida teniotis
59483	4	d9a5aa54-6c6f-44f1-860b-096859370900	KY581661.1	96.774	92.8835	90.566|96.774	2.33e-20	1.57002e-06	5e-25|6.28e-06	62	67	53|92	14181	13223	6556|16155	16869	16869	16869|16869	Mammalia	Chiroptera	Molossidae	Tadarida	Tadarida teniotis
77229	1	72e4903a-d379-42d1-b0fe-3e7931aa99c5	OK274257.1	92	92	92|92	8.78e-19	8.78e-19	8.78e-19|8.78e-19	75	75	75|75	611	611	611|611	16687	16687	16687|16687	Mammalia	Chiroptera	Pteropodidae	Balionycteris	Balionycteris maculata
124750	1	1336c270-a123-425c-9059-190a6da38603	OP205373.1	93.151	93.151	93.151|93.151	2.76e-18	2.76e-18	2.76e-18|2.76e-18	73	73	73|73	7293	7293	7293|7293	16792	16792	16792|16792	Mammalia	Chiroptera	Phyllostomidae	Macrotus	Macrotus waterhousii
2049285	1	4042eb2c-98bf-417d-bb13-151fce1cc618	MK177282.1	92.647	92.647	92.647|92.647	7.66e-16	7.66e-16	7.66e-16|7.66e-16	68	68	68|68	2265	2265	2265|2265	16622	16622	16622|16622	Mammalia	Chiroptera	Molossidae	Tadarida	Tadarida latouchei
478698	2	26bd594c-9a11-4de8-bc31-2262bd078295	KY581660.1	90.476	92.408	90.476|94.34	1.02e-15	2.306e-14	1.02e-15|4.51e-14	84	68.5	53|84	11737	6996	2255|11737	16216	16216	16216|16216	Mammalia	Chiroptera	Molossidae	Chaerephon	Chaerephon plicatus
478698	2	0de71b02-2a7c-444b-9aa3-6000ea1878af	KY581660.1	94.34	92.408	90.476|94.34	4.51e-14	2.306e-14	1.02e-15|4.51e-14	53	68.5	53|84	2255	6996	2255|11737	16216	16216	16216|16216	Mammalia	Chiroptera	Molossidae	Chaerephon	Chaerephon plicatus
59483	4	15dc1e20-0dc9-483c-9892-6637bbd7e617	KY581661.1	91.803	92.8835	90.566|96.774	7.42e-11	1.57002e-06	5e-25|6.28e-06	61	67	53|92	16000	13223	6556|16155	16869	16869	16869|16869	Mammalia	Chiroptera	Molossidae	Tadarida	Tadarida teniotis
1609901	1	4e7497e0-63aa-4902-80aa-1760fe916cc7	MN816360.1	100	100	100|100	2.52e-10	2.52e-10	2.52e-10|2.52e-10	36	36	36|36	13957	13957	13957|13957	16727	16727	16727|16727	Mammalia	Chiroptera	Pteropodidae	Scotonycteris	Scotonycteris bergmansi
999964	1	d023a7fe-cddc-4b5b-a34d-ebf10dcbc27e	KR606332.1	90	90	90|90	4.56e-09	4.56e-09	4.56e-09|4.56e-09	60	60	60|60	1110	1110	1110|1110	1124	1124	1124|1124	Mammalia	Chiroptera	Molossidae	Mormopterus	Mormopterus jugularis
867883	1	dcc762fe-21a1-4d61-8cfb-5b8a7a2e30c7	HM561629.1	97.297	97.297	97.297|97.297	1.12e-08	1.12e-08	1.12e-08|1.12e-08	37	37	37|37	2708	2708	2708|2708	2675	2675	2675|2675	Mammalia	Chiroptera	Vespertilionidae	Pipistrellus	Pipistrellus paterculus
105295	1	259541a1-0663-4aee-8323-fa3771f4ea5c	KX355640.1	95	95	95|95	6.83e-07	6.83e-07	6.83e-07|6.83e-07	40	40	40|40	10817	10817	10817|10817	17236	17236	17236|17236	Mammalia	Chiroptera	Vespertilionidae	Pipistrellus	Pipistrellus abramus
59483	4	ce10eebf-f204-4e7d-9697-31f72bd9d162	KY581661.1	90.566	92.8835	90.566|96.774	6.28e-06	1.57002e-06	5e-25|6.28e-06	53	67	53|92	6556	13223	6556|16155	16869	16869	16869|16869	Mammalia	Chiroptera	Molossidae	Tadarida	Tadarida teniotis
JFD1645
subject.tax.id	Count	query.acc.ver	subject.acc.ver	X..identity	Average.X..identity	X..identity.range	evalue	Average.evalue	evalue.range	alignment.length	Average.alignment.length	alignment.length.range	query.length	Average.query.length	query.length.range	subject.length	Average.subject.length	subject.length.range	class	order	family	genus	species
2964413	12	cafb5926-2f6b-438f-979e-815192a071ea	MZ364435.1	97.091	94.6354	90.433|97.98	0	1.65e-95	0|1.98e-94	550	474.25	198|564	3033	4968.08	951|16611	549	549	549|549	Mammalia	Rodentia	Cricetidae	Akodon	Akodon sp. IAvH-CT-06096
2964413	12	c27181ec-271f-4cc2-b945-17181e74f059	MZ364435.1	96.926	94.6354	90.433|97.98	0	1.65e-95	0|1.98e-94	553	474.25	198|564	9496	4968.08	951|16611	549	549	549|549	Mammalia	Rodentia	Cricetidae	Akodon	Akodon sp. IAvH-CT-06096
2964413	12	dec952e4-1d36-4c00-8e67-2929a0426f35	MZ364435.1	96.89	94.6354	90.433|97.98	0	1.65e-95	0|1.98e-94	418	474.25	198|564	6318	4968.08	951|16611	549	549	549|549	Mammalia	Rodentia	Cricetidae	Akodon	Akodon sp. IAvH-CT-06096
2964413	12	c77b931b-a786-43c6-bfa9-838eb2f2e7df	MZ364435.1	96.383	94.6354	90.433|97.98	0	1.65e-95	0|1.98e-94	553	474.25	198|564	3982	4968.08	951|16611	549	549	549|549	Mammalia	Rodentia	Cricetidae	Akodon	Akodon sp. IAvH-CT-06096
230186	11	eb509d62-43e9-47c0-a16d-8aa150808874	MK419958.1	95.841	94.6939	90.765|98.266	0	2.10364e-82	0|1.42e-81	529	486.182	173|1160	1210	2759.18	264|11999	801	955.091	801|1140	Mammalia	Rodentia	Cricetidae	Akodon	Akodon affinis
230186	11	4437a05f-fc3b-45f9-b66b-68f0cef77084	AY196164.1	95.222	94.6939	90.765|98.266	0	2.10364e-82	0|1.42e-81	1151	486.182	173|1160	4832	2759.18	264|11999	1140	955.091	801|1140	Mammalia	Rodentia	Cricetidae	Akodon	Akodon affinis
2964413	12	f5496980-c3e3-4ce9-9bb5-8a4ea9ddd216	MZ364435.1	94.698	94.6354	90.433|97.98	0	1.65e-95	0|1.98e-94	547	474.25	198|564	16611	4968.08	951|16611	549	549	549|549	Mammalia	Rodentia	Cricetidae	Akodon	Akodon sp. IAvH-CT-06096
10075	11	023fc1ee-8908-4d14-b848-72bad37440af	MF806252.1	94.251	92.781	90.705|95.146	0	2.07273e-68	0|2.28e-67	661	445.364	203|669	1124	2298.09	269|4270	657	657	657|657	Mammalia	Rodentia	Cricetidae	Akodon	Akodon mollis
10075	11	09d04d73-e44b-4155-a913-ae15abcab5df	MF806252.1	94.1	92.781	90.705|95.146	0	2.07273e-68	0|2.28e-67	661	445.364	203|669	1973	2298.09	269|4270	657	657	657|657	Mammalia	Rodentia	Cricetidae	Akodon	Akodon mollis
2964413	12	34cd01cd-e388-453e-ab42-4dbafc249522	MZ364435.1	93.794	94.6354	90.433|97.98	0	1.65e-95	0|1.98e-94	564	474.25	198|564	5477	4968.08	951|16611	549	549	549|549	Mammalia	Rodentia	Cricetidae	Akodon	Akodon sp. IAvH-CT-06096
230186	11	167b7f7d-1f63-46f6-b4ca-b6ef6ed32724	AY196164.1	92.759	94.6939	90.765|98.266	0	2.10364e-82	0|1.42e-81	1160	486.182	173|1160	11999	2759.18	264|11999	1140	955.091	801|1140	Mammalia	Rodentia	Cricetidae	Akodon	Akodon affinis
140765	3	9b211f7f-c4cc-4b5c-9b3d-10e56e8c7de5	AF296261.1	92.407	94.2447	92.179|98.148	0	3.83333e-18	0|1.15e-17	540	377	54|540	2747	1616.33	912|2747	1323	1323	1323|1323	Mammalia	Rodentia	Cricetidae	Akodon	Akodon baliolus
106112	15	f2f3fe07-c976-4d20-8b00-925e4c3ae293	KF769456.1	92.401	91.9987	90.08|96	0	5.44667e-13	0|8.17e-12	908	713.933	50|5222	1645	1810.73	213|7803	16378	16378	16378|16378	Mammalia	Rodentia	Cricetidae	Akodon	Akodon montensis
106112	15	525f0ec1-33cc-4f71-aa0a-9842511c12f9	KF769456.1	92.397	91.9987	90.08|96	0	5.44667e-13	0|8.17e-12	776	713.933	50|5222	5381	1810.73	213|7803	16378	16378	16378|16378	Mammalia	Rodentia	Cricetidae	Akodon	Akodon montensis
140765	3	ea86e88d-dc64-4c6a-8f47-e11e1a219c6d	AF296261.1	92.179	94.2447	92.179|98.148	0	3.83333e-18	0|1.15e-17	537	377	54|540	1190	1616.33	912|2747	1323	1323	1323|1323	Mammalia	Rodentia	Cricetidae	Akodon	Akodon baliolus
10070	4	96aca927-c3b6-4af5-8bdf-baa17d855eeb	AF296258.1	91.993	91.854	90.337|94	0	0	0|2.89e-134	537	787	350|1133	1731	3345.5	1731|5278	1291	1215.5	1140|1291	Mammalia	Rodentia	Cricetidae	Akodon	Akodon aerosus
10075	11	3771c28e-807c-45db-8a39-6d987d2edc00	MF806252.1	91.779	92.781	90.705|95.146	0	2.07273e-68	0|2.28e-67	669	445.364	203|669	2494	2298.09	269|4270	657	657	657|657	Mammalia	Rodentia	Cricetidae	Akodon	Akodon mollis
2964413	12	3cab6675-1372-45fa-9e38-4f542f0aaadb	MZ364435.1	91.771	94.6354	90.433|97.98	0	1.65e-95	0|1.98e-94	559	474.25	198|564	8506	4968.08	951|16611	549	549	549|549	Mammalia	Rodentia	Cricetidae	Akodon	Akodon sp. IAvH-CT-06096
10075	11	3be0e348-b306-407b-8224-5e8c22f42c3a	MF806252.1	91.312	92.781	90.705|95.146	0	2.07273e-68	0|2.28e-67	564	445.364	203|669	3137	2298.09	269|4270	657	657	657|657	Mammalia	Rodentia	Cricetidae	Akodon	Akodon mollis
10078	3	9b1862f0-861a-43e2-9297-3ac24058507e	AF296276.1	91.216	91.8663	91.216|92.88	0	7.66667e-47	0|2.3e-46	740	400.667	153|740	1111	2520	360|6089	1258	1258	1258|1258	Mammalia	Rodentia	Cricetidae	Akodon	Akodon torques
106112	15	3a27e695-dce7-4c91-8196-3887e1cd1bb2	KF769456.1	91.196	91.9987	90.08|96	0	5.44667e-13	0|8.17e-12	1045	713.933	50|5222	1432	1810.73	213|7803	16378	16378	16378|16378	Mammalia	Rodentia	Cricetidae	Akodon	Akodon montensis
2964413	12	42a6dd10-8225-4b32-81e3-cffc9384a4ec	MZ364435.1	91.103	94.6354	90.433|97.98	0	1.65e-95	0|1.98e-94	562	474.25	198|564	1682	4968.08	951|16611	549	549	549|549	Mammalia	Rodentia	Cricetidae	Akodon	Akodon sp. IAvH-CT-06096
10070	4	9f666712-f414-461d-a7fa-0228e29d1594	KC841346.1	91.086	91.854	90.337|94	0	0	0|2.89e-134	1133	787	350|1133	5278	3345.5	1731|5278	1140	1215.5	1140|1291	Mammalia	Rodentia	Cricetidae	Akodon	Akodon aerosus
230186	11	4d141d6c-7104-485c-a342-a3a220f2e32a	AY196164.1	90.765	94.6939	90.765|98.266	0	2.10364e-82	0|1.42e-81	758	486.182	173|1160	6560	2759.18	264|11999	1140	955.091	801|1140	Mammalia	Rodentia	Cricetidae	Akodon	Akodon affinis
10075	11	f9d62870-7431-44a8-81e3-5df8d17a1495	MF806252.1	90.705	92.781	90.705|95.146	0	2.07273e-68	0|2.28e-67	667	445.364	203|669	4266	2298.09	269|4270	657	657	657|657	Mammalia	Rodentia	Cricetidae	Akodon	Akodon mollis
2964413	12	5fabf6b7-e78b-4e75-bfa8-c762e1eb8180	MZ364435.1	90.433	94.6354	90.433|97.98	0	1.65e-95	0|1.98e-94	554	474.25	198|564	1106	4968.08	951|16611	549	549	549|549	Mammalia	Rodentia	Cricetidae	Akodon	Akodon sp. IAvH-CT-06096
10070	4	455b2de9-3eb8-44c2-9d40-2c002f35f106	KC841346.1	90.337	91.854	90.337|94	0	0	0|2.89e-134	1128	787	350|1133	4373	3345.5	1731|5278	1140	1215.5	1140|1291	Mammalia	Rodentia	Cricetidae	Akodon	Akodon aerosus
484371	2	56bb0c0a-caa0-4be0-9655-a3488a26dc5e	MW009983.1	90.139	92.2285	90.139|94.318	0	2.555e-64	0|5.11e-64	649	412.5	176|649	2443	1464	485|2443	655	667	655|679	Mammalia	Rodentia	Cricetidae	Akodon	Akodon simulator
106112	15	f1d90cc8-7191-427b-bc55-b57de56eca1c	KF769456.1	90.08	91.9987	90.08|96	0	5.44667e-13	0|8.17e-12	5222	713.933	50|5222	7056	1810.73	213|7803	16378	16378	16378|16378	Mammalia	Rodentia	Cricetidae	Akodon	Akodon montensis
140762	3	6ff62eb7-c923-4b78-abca-c2233d0f2bb1	AF296278.1	90	91.419	90|93.642	0	1.86e-61	0|5.58e-61	600	360.667	173|600	795	1217.67	637|2221	1251	1251	1251|1251	Mammalia	Rodentia	Cricetidae	Akodon	Akodon varius
106112	15	1f4e40b7-624b-44a3-97d2-e72abebd4306	KF769456.1	93.197	91.9987	90.08|96	9.55e-167	5.44667e-13	0|8.17e-12	441	713.933	50|5222	7803	1810.73	213|7803	16378	16378	16378|16378	Mammalia	Rodentia	Cricetidae	Akodon	Akodon montensis
106112	15	b55b8bb2-8860-4944-ae78-2158df627383	KF769456.1	90.144	91.9987	90.08|96	1.44e-152	5.44667e-13	0|8.17e-12	487	713.933	50|5222	537	1810.73	213|7803	16378	16378	16378|16378	Mammalia	Rodentia	Cricetidae	Akodon	Akodon montensis
2964413	12	29dbc163-cf74-4845-90f7-75bcf96e864c	MZ364435.1	96.273	94.6354	90.433|97.98	4e-148	1.65e-95	0|1.98e-94	322	474.25	198|564	1073	4968.08	951|16611	549	549	549|549	Mammalia	Rodentia	Cricetidae	Akodon	Akodon sp. IAvH-CT-06096
56217	2	0e04f7bb-f4d4-48fd-8f5e-00a54597ab5b	U83813.1	90.177	91.357	90.177|92.537	6.26e-147	1.045e-38	6.26e-147|2.09e-38	509	321.5	134|509	1105	943	781|1105	1326	1326	1326|1326	Mammalia	Rodentia	Cricetidae	Necromys	Necromys lactens
10075	11	374e3ecd-4bcf-49e1-8fb6-e873aa677c47	MF806252.1	93.077	92.781	90.705|95.146	1.11e-145	2.07273e-68	0|2.28e-67	390	445.364	203|669	1288	2298.09	269|4270	657	657	657|657	Mammalia	Rodentia	Cricetidae	Akodon	Akodon mollis
230186	11	3e38ba7c-0b8a-4756-b781-4fbdf8238c7f	AY196164.1	98.168	94.6939	90.765|98.266	9.41e-136	2.10364e-82	0|1.42e-81	273	486.182	173|1160	272	2759.18	264|11999	1140	955.091	801|1140	Mammalia	Rodentia	Cricetidae	Akodon	Akodon affinis
230186	11	be7d9786-1bfb-45f9-868e-53ba1fb62f32	MK419958.1	92.978	94.6939	90.765|98.266	2.04e-134	2.10364e-82	0|1.42e-81	356	486.182	173|1160	379	2759.18	264|11999	801	955.091	801|1140	Mammalia	Rodentia	Cricetidae	Akodon	Akodon affinis
10070	4	c2c0f2dc-bab5-4fa0-ae2b-edc5dad36667	AF296258.1	94	91.854	90.337|94	2.89e-134	0	0|2.89e-134	350	787	350|1133	2000	3345.5	1731|5278	1291	1215.5	1140|1291	Mammalia	Rodentia	Cricetidae	Akodon	Akodon aerosus
10075	11	7691d4ba-c751-4913-9f01-0db4f5e14e7c	MF806213.1	95.146	92.781	90.705|95.146	1.74e-126	2.07273e-68	0|2.28e-67	309	445.364	203|669	2519	2298.09	269|4270	657	657	657|657	Mammalia	Rodentia	Cricetidae	Akodon	Akodon mollis
2964413	12	7489ac1f-3816-4a95-bd6f-57799c617028	MZ364435.1	92.283	94.6354	90.433|97.98	1.42e-112	1.65e-95	0|1.98e-94	311	474.25	198|564	1382	4968.08	951|16611	549	549	549|549	Mammalia	Rodentia	Cricetidae	Akodon	Akodon sp. IAvH-CT-06096
10078	3	907b62ae-a994-47b0-b40a-98dead6fbb51	AF296276.1	92.88	91.8663	91.216|92.88	1.88e-108	7.66667e-47	0|2.3e-46	309	400.667	153|740	360	2520	360|6089	1258	1258	1258|1258	Mammalia	Rodentia	Cricetidae	Akodon	Akodon torques
230186	11	23791cb0-e7bf-4841-945d-265074c37ea6	MK419958.1	95.635	94.6939	90.765|98.266	5.76e-108	2.10364e-82	0|1.42e-81	252	486.182	173|1160	288	2759.18	264|11999	801	955.091	801|1140	Mammalia	Rodentia	Cricetidae	Akodon	Akodon affinis
106112	15	cde8f25f-9ec6-47ef-8978-bde75fcde3dc	KF769456.1	90.113	91.9987	90.08|96	4.13e-103	5.44667e-13	0|8.17e-12	354	713.933	50|5222	381	1810.73	213|7803	16378	16378	16378|16378	Mammalia	Rodentia	Cricetidae	Akodon	Akodon montensis
230186	11	42baa8f1-8769-4063-bf71-11070069c1d4	AY196164.1	94	94.6939	90.765|98.266	1.31e-96	2.10364e-82	0|1.42e-81	250	486.182	173|1160	1438	2759.18	264|11999	1140	955.091	801|1140	Mammalia	Rodentia	Cricetidae	Akodon	Akodon affinis
10072	2	9dc98c30-c7ed-421e-aa39-4fc8de52ab28	AF296262.1	90.221	90.4885	90.221|90.756	1.7e-95	2.41e-32	1.7e-95|4.82e-32	317	218	119|317	1231	905.5	580|1231	1242	1242	1242|1242	Mammalia	Rodentia	Cricetidae	Akodon	Akodon boliviensis
2964413	12	b3afdd8c-3ff2-42e8-a10a-036e69e9c045	MZ364435.1	97.98	94.6354	90.433|97.98	1.98e-94	1.65e-95	0|1.98e-94	198	474.25	198|564	951	4968.08	951|16611	549	549	549|549	Mammalia	Rodentia	Cricetidae	Akodon	Akodon sp. IAvH-CT-06096
140762	3	943f3db5-a30e-4189-89f4-5b9f0f7cf5ed	AF296278.1	90.615	91.419	90|93.642	5.11e-94	1.86e-61	0|5.58e-61	309	360.667	173|600	637	1217.67	637|2221	1251	1251	1251|1251	Mammalia	Rodentia	Cricetidae	Akodon	Akodon varius
10075	11	21e86e94-ceda-4809-b4e7-7eb8f4c9bed8	MF806252.1	92.199	92.781	90.705|95.146	1.37e-92	2.07273e-68	0|2.28e-67	282	445.364	203|669	4270	2298.09	269|4270	657	657	657|657	Mammalia	Rodentia	Cricetidae	Akodon	Akodon mollis
364155	1	ea61169a-c010-4411-b79d-faa16366681e	MT492450.1	92.607	92.607	92.607|92.607	7.42e-91	7.42e-91	7.42e-91|7.42e-91	257	257	257|257	1017	1017	1017|1017	16346	16346	16346|16346	Mammalia	Rodentia	Cricetidae	Synaptomys	Synaptomys cooperi
230186	11	381ec2af-9f91-4769-82d1-727ec2894f66	MK419958.1	95.327	94.6939	90.765|98.266	1.62e-88	2.10364e-82	0|1.42e-81	214	486.182	173|1160	264	2759.18	264|11999	801	955.091	801|1140	Mammalia	Rodentia	Cricetidae	Akodon	Akodon affinis
10075	11	96ff38cf-ad36-4ced-abad-ddca3ef880a3	MF806252.1	94.144	92.781	90.705|95.146	3.82e-86	2.07273e-68	0|2.28e-67	222	445.364	203|669	269	2298.09	269|4270	657	657	657|657	Mammalia	Rodentia	Cricetidae	Akodon	Akodon mollis
10075	11	6f4f2915-86bd-4f42-ac74-d541ac71d4fd	MF806212.1	90.775	92.781	90.705|95.146	1.48e-82	2.07273e-68	0|2.28e-67	271	445.364	203|669	1090	2298.09	269|4270	657	657	657|657	Mammalia	Rodentia	Cricetidae	Akodon	Akodon mollis
230186	11	83671a79-fa1d-491b-89a8-e3a2f11937d9	MK419958.1	92.672	94.6939	90.765|98.266	8.94e-82	2.10364e-82	0|1.42e-81	232	486.182	173|1160	446	2759.18	264|11999	801	955.091	801|1140	Mammalia	Rodentia	Cricetidae	Akodon	Akodon affinis
230186	11	577099ad-b555-497c-ae4f-f932c09ce8f8	MK419958.1	98.266	94.6939	90.765|98.266	1.42e-81	2.10364e-82	0|1.42e-81	173	486.182	173|1160	2663	2759.18	264|11999	801	955.091	801|1140	Mammalia	Rodentia	Cricetidae	Akodon	Akodon affinis
106112	15	61cea901-5a7c-44f1-a376-41a1e9797acf	KF769456.1	93.897	91.9987	90.08|96	1.98e-81	5.44667e-13	0|8.17e-12	213	713.933	50|5222	263	1810.73	213|7803	16378	16378	16378|16378	Mammalia	Rodentia	Cricetidae	Akodon	Akodon montensis
106112	15	b6d9b5c8-d88c-46dd-b45e-a4c178539b1a	KF769456.1	91.525	91.9987	90.08|96	3.2e-77	5.44667e-13	0|8.17e-12	236	713.933	50|5222	308	1810.73	213|7803	16378	16378	16378|16378	Mammalia	Rodentia	Cricetidae	Akodon	Akodon montensis
89098	2	f56e8f8b-81bd-4290-8b8a-daa0b2894bcd	OL685394.1	90.196	90.4315	90.196|90.667	1.73e-76	1.875e-14	1.73e-76|3.75e-14	255	165	75|255	1571	1210.5	850|1571	16358	16358	16358|16358	Mammalia	Rodentia	Cricetidae	Holochilus	Holochilus sciureus
106112	15	786a25dc-e0b8-4c09-894d-c23698f27696	KF769456.1	92.823	91.9987	90.08|96	1.21e-69	5.44667e-13	0|8.17e-12	209	713.933	50|5222	249	1810.73	213|7803	16378	16378	16378|16378	Mammalia	Rodentia	Cricetidae	Akodon	Akodon montensis
10075	11	82d475c7-3d1e-4f51-9f17-68d86337bce3	MF806212.1	93.103	92.781	90.705|95.146	2.28e-67	2.07273e-68	0|2.28e-67	203	445.364	203|669	2849	2298.09	269|4270	657	657	657|657	Mammalia	Rodentia	Cricetidae	Akodon	Akodon mollis
106112	15	e6861117-8131-4708-acd1-a68ed02af78f	KF769456.1	92.04	91.9987	90.08|96	2.53e-64	5.44667e-13	0|8.17e-12	201	713.933	50|5222	251	1810.73	213|7803	16378	16378	16378|16378	Mammalia	Rodentia	Cricetidae	Akodon	Akodon montensis
484371	2	f395f457-d303-4801-8ffa-c1e134803ced	MW009985.1	94.318	92.2285	90.139|94.318	5.11e-64	2.555e-64	0|5.11e-64	176	412.5	176|649	485	1464	485|2443	679	667	655|679	Mammalia	Rodentia	Cricetidae	Akodon	Akodon simulator
106112	15	7953ed81-ca8f-492f-adb9-f1a36d29b3fe	KF769456.1	90.821	91.9987	90.08|96	2.3e-61	5.44667e-13	0|8.17e-12	207	713.933	50|5222	254	1810.73	213|7803	16378	16378	16378|16378	Mammalia	Rodentia	Cricetidae	Akodon	Akodon montensis
140762	3	e7a86424-e154-410f-b73c-71bd93a3e35f	AF296278.1	93.642	91.419	90|93.642	5.58e-61	1.86e-61	0|5.58e-61	173	360.667	173|600	2221	1217.67	637|2221	1251	1251	1251|1251	Mammalia	Rodentia	Cricetidae	Akodon	Akodon varius
106112	15	9cd639f6-2735-4b0a-a855-761aca450392	KF769456.1	92.09	91.9987	90.08|96	1.28e-58	5.44667e-13	0|8.17e-12	177	713.933	50|5222	583	1810.73	213|7803	16378	16378	16378|16378	Mammalia	Rodentia	Cricetidae	Akodon	Akodon montensis
10076	1	50c32a99-a52c-49f5-8fd2-2296120f5a49	AF296273.1	90.244	90.244	90.244|90.244	3.06e-58	3.06e-58	3.06e-58|3.06e-58	205	205	205|205	366	366	366|366	1241	1241	1241|1241	Mammalia	Rodentia	Cricetidae	Akodon	Akodon lutescens
2048992	1	714dd252-3a2d-428d-a32b-88fd71954aa7	ON165296.1	90.64	90.64	90.64|90.64	9.14e-54	9.14e-54	9.14e-54|9.14e-54	203	203	203|203	777	777	777|777	16341	16341	16341|16341	Mammalia	Rodentia	Cricetidae	Eothenomys	Eothenomys shimianensis
907928	1	e785f9fa-96cf-4bc6-a940-e26236b7ce9d	KY117564.1	91.071	91.071	91.071|91.071	5.4e-51	5.4e-51	5.4e-51|5.4e-51	168	168	168|168	1958	1958	1958|1958	16200	16200	16200|16200	Mammalia	Rodentia	Muridae	Maxomys	Maxomys rajah
106112	15	b5f98f6f-9438-4c9d-83e0-c305027ebc94	KF769456.1	91.257	91.9987	90.08|96	8.11e-51	5.44667e-13	0|8.17e-12	183	713.933	50|5222	213	1810.73	213|7803	16378	16378	16378|16378	Mammalia	Rodentia	Cricetidae	Akodon	Akodon montensis
10078	3	2e4f1469-6b11-43cc-a719-4c6e2dc14b55	AF296276.1	91.503	91.8663	91.216|92.88	2.3e-46	7.66667e-47	0|2.3e-46	153	400.667	153|740	6089	2520	360|6089	1258	1258	1258|1258	Mammalia	Rodentia	Cricetidae	Akodon	Akodon torques
61159	1	d672d240-aae0-486b-8707-876ae7dff5b0	MN807583.1	92.969	92.969	92.969|92.969	2.31e-39	2.31e-39	2.31e-39|2.31e-39	128	128	128|128	348	348	348|348	16276	16276	16276|16276	Mammalia	Rodentia	Muridae	Lemniscomys	Lemniscomys bellieri
56217	2	63910f96-358b-4d15-84de-925e584850fe	U83813.1	92.537	91.357	90.177|92.537	2.09e-38	1.045e-38	6.26e-147|2.09e-38	134	321.5	134|509	781	943	781|1105	1326	1326	1326|1326	Mammalia	Rodentia	Cricetidae	Necromys	Necromys lactens
42408	1	b20886df-0fbd-46e0-abc3-8ba3f941ade6	OM963003.1	90.769	90.769	90.769|90.769	3.35e-33	3.35e-33	3.35e-33|3.35e-33	130	130	130|130	610	610	610|610	16301	16301	16301|16301	Mammalia	Rodentia	Cricetidae	Neotoma	Neotoma albigula
10072	2	6f573672-6fa8-4c42-ba7d-e9e41a42e4ca	AF296262.1	90.756	90.4885	90.221|90.756	4.82e-32	2.41e-32	1.7e-95|4.82e-32	119	218	119|317	580	905.5	580|1231	1242	1242	1242|1242	Mammalia	Rodentia	Cricetidae	Akodon	Akodon boliviensis
537921	1	eafd8efe-156b-4307-aa7c-5c0f4d017097	MT381940.1	91.453	91.453	91.453|91.453	1.36e-31	1.36e-31	1.36e-31|1.36e-31	117	117	117|117	425	425	425|425	16350	16350	16350|16350	Mammalia	Rodentia	Cricetidae	Myodes	Myodes centralis
979811	1	7678e8c7-82a1-4627-a892-6b6ce7cac08b	HQ907353.1	90.551	90.551	90.551|90.551	2.66e-29	2.66e-29	2.66e-29|2.66e-29	127	127	127|127	1356	1356	1356|1356	1165	1165	1165|1165	Lepidosauria	Squamata	Scincidae	Brachymeles	Brachymeles boulengeri
577681	2	5422ed9a-418e-47a0-8c99-055f38054dc8	ON165328.1	93.878	93.418	92.958|93.878	1.02e-28	2.865e-19	1.02e-28|5.73e-19	98	84.5	71|98	359	276.5	194|359	16415	16415	16415|16415	Mammalia	Rodentia	Cricetidae	Eothenomys	Eothenomys chinensis
10121	1	766e7151-6284-4717-acbe-2b506baac0cd	NC_014861.1	94.505	94.505	94.505|94.505	1.1e-28	1.1e-28	1.1e-28|1.1e-28	91	91	91|91	1437	1437	1437|1437	16292	16292	16292|16292	Mammalia	Rodentia	Muridae	Rattus	Rattus tunneyi
182669	1	9860497f-0c6c-478e-92b6-48532be3be6b	NC_031330.1	90.598	90.598	90.598|90.598	1.43e-27	1.43e-27	1.43e-27|1.43e-27	117	117	117|117	1233	1233	1233|1233	16536	16536	16536|16536	Mammalia	Eulipotyphla	Talpidae	Uropsilus	Uropsilus gracilis
492276	1	4c58373f-7315-4baf-97c0-fc2e21289143	EU192185.1	97.333	97.333	97.333|97.333	9.9e-27	9.9e-27	9.9e-27|9.9e-27	75	75	75|75	576	576	576|576	952	952	952|952	Mammalia	Rodentia	Cricetidae	Oligoryzomys	Oligoryzomys sp. B MUSA2625
269658	1	40bdd063-dec4-45ad-a359-084dec0094c9	MT381932.1	91.589	91.589	91.589|91.589	7.8e-26	7.8e-26	7.8e-26|7.8e-26	107	107	107|107	1141	1141	1141|1141	16339	16339	16339|16339	Mammalia	Rodentia	Cricetidae	Microtus	Microtus socialis
329629	1	eb8740a6-0273-4481-8318-0301b3a958f4	NC_053822.1	92.079	92.079	92.079|92.079	1.06e-25	1.06e-25	1.06e-25|1.06e-25	101	101	101|101	1544	1544	1544|1544	16282	16282	16282|16282	Mammalia	Rodentia	Cricetidae	Cricetulus	Cricetulus barabensis
2613867	1	0d4f7f50-a62e-41f6-b9e8-c51d2b6fda23	ON165308.1	95.89	95.89	95.89|95.89	1.67e-24	1.67e-24	1.67e-24|1.67e-24	73	73	73|73	427	427	427|427	16333	16333	16333|16333	Mammalia	Rodentia	Cricetidae	Neodon	Neodon medogensis
10077	1	c28827b0-65db-4c16-b6e9-efd9e1a4cf57	AF296275.1	93.333	93.333	93.333|93.333	4.34e-24	4.34e-24	4.34e-24|4.34e-24	90	90	90|90	1074	1074	1074|1074	1275	1275	1275|1275	Mammalia	Rodentia	Cricetidae	Akodon	Akodon subfuscus
209873	1	83f75e75-deec-4ee0-be8d-8010c311b465	MZ131570.1	97.015	97.015	97.015|97.015	3.22e-21	3.22e-21	3.22e-21|3.22e-21	67	67	67|67	3412	3412	3412|3412	16245	16245	16245|16245	Mammalia	Rodentia	Muridae	Zelotomys	Zelotomys hildegardeae
2749091	1	815eaf37-6c0e-4cb9-b08a-a531b041f76d	MT174523.1	92.135	92.135	92.135|92.135	3.94e-21	3.94e-21	3.94e-21|3.94e-21	89	89	89|89	295	295	295|295	16513	16513	16513|16513	Mammalia	Rodentia	Sciuridae	Guerlinguetus	Guerlinguetus brasiliensis
1344532	1	212138bd-df80-4dc4-8bb4-c1e51f1bc845	KC881568.1	98.361	98.361	98.361|98.361	6.58e-21	6.58e-21	6.58e-21|6.58e-21	61	61	61|61	1801	1801	1801|1801	736	736	736|736	Arachnida	Araneae	Theraphosidae	Haplopelma	Haplopelma longipes
1481751	1	f20f11d0-d550-404a-9c4e-4c15922c1032	OQ354976.1	96.825	96.825	96.825|96.825	1.07e-19	1.07e-19	1.07e-19|1.07e-19	63	63	63|63	7439	7439	7439|7439	15373	15373	15373|15373	Insecta	Lepidoptera	Notodontidae	Micromelalopha	Micromelalopha sieversi
1086267	1	0b5639f1-6254-40c2-bf95-1c2027a8d16c	MZ343807.1	92.958	92.958	92.958|92.958	5.59e-19	5.59e-19	5.59e-19|5.59e-19	71	71	71|71	2578	2578	2578|2578	15939	15939	15939|15939	Insecta	Lepidoptera	Sphingidae	Dahira	Dahira obliquifascia
577681	2	5b671c73-ee00-4356-80fe-cedd1ac58b3d	ON165328.1	92.958	93.418	92.958|93.878	5.73e-19	2.865e-19	1.02e-28|5.73e-19	71	84.5	71|98	194	276.5	194|359	16415	16415	16415|16415	Mammalia	Rodentia	Cricetidae	Eothenomys	Eothenomys chinensis
397749	1	a7b2b432-e235-4f6a-9b95-7d1a6f21075d	KY707304.1	96.61	96.61	96.61|96.61	9.96e-18	9.96e-18	9.96e-18|9.96e-18	59	59	59|59	219	219	219|219	16515	16515	16515|16515	Mammalia	Rodentia	Cricetidae	Habromys	Habromys ixtlani
140765	3	c4a6caae-b53a-4f8d-9890-647d758e551d	AF296261.1	98.148	94.2447	92.179|98.148	1.15e-17	3.83333e-18	0|1.15e-17	54	377	54|540	912	1616.33	912|2747	1323	1323	1323|1323	Mammalia	Rodentia	Cricetidae	Akodon	Akodon baliolus
269650	1	2dcd6e80-7a09-42de-b66f-5f2c513eba97	OK323270.1	92.683	92.683	92.683|92.683	1.16e-17	1.16e-17	1.16e-17|1.16e-17	82	82	82|82	13675	13675	13675|13675	16300	16300	16300|16300	Mammalia	Rodentia	Cricetidae	Chionomys	Chionomys roberti
112157	1	b2548eb6-6c9b-4a99-996f-8516eac89f09	AP009609.1	90.805	90.805	90.805|90.805	1.43e-17	1.43e-17	1.43e-17|1.43e-17	87	87	87|87	1125	1125	1125|1125	17124	17124	17124|17124	Actinopteri	Osteoglossiformes	Mormyridae	Petrocephalus	Petrocephalus microphthalmus
79684	1	c3a20617-ab7c-42a5-8d83-bd24ed1e54bd	KT166982.1	94.118	94.118	94.118|94.118	6.24e-17	6.24e-17	6.24e-17|6.24e-17	68	68	68|68	339	339	339|339	16292	16292	16292|16292	Mammalia	Rodentia	Cricetidae	Microtus	Microtus ochrogaster
129228	1	b8223cf0-a8cf-4ea0-8c8b-38eea5a93c6a	NC_020692.1	92.647	92.647	92.647|92.647	8.46e-16	8.46e-16	8.46e-16|8.46e-16	68	68	68|68	1127	1127	1127|1127	16426	16426	16426|16426	Mammalia	Artiodactyla	Bovidae	Cephalophorus	Cephalophorus ogilbyi
2107264	1	c9327e9f-57d5-44c7-8913-25f29e5466cc	MG701900.1	92.537	92.537	92.537|92.537	9.66e-16	9.66e-16	9.66e-16|9.66e-16	67	67	67|67	345	345	345|345	1177	1177	1177|1177	Mammalia	Rodentia	Muridae	Hybomys	Hybomys trivirgatus
89098	2	2a1747d5-4dcb-4312-8b14-e89efdc5b16f	OL685394.1	90.667	90.4315	90.196|90.667	3.75e-14	1.875e-14	1.73e-76|3.75e-14	75	165	75|255	850	1210.5	850|1571	16358	16358	16358|16358	Mammalia	Rodentia	Cricetidae	Holochilus	Holochilus sciureus
208481	1	e6118275-85ff-4e21-bcae-f3062767a040	EU871947.1	96.154	96.154	96.154|96.154	1.16e-13	1.16e-13	1.16e-13|1.16e-13	52	52	52|52	680	680	680|680	18728	18728	18728|18728	Insecta	Hymenoptera	Ichneumonidae	Diadegma	Diadegma semiclausum
64677	1	0f0aad86-e557-4ede-b6e8-539fefef617e	KM502568.1	94.643	94.643	94.643|94.643	1.51e-13	1.51e-13	1.51e-13|1.51e-13	56	56	56|56	878	878	878|878	16550	16550	16550|16550	Mammalia	Rodentia	Sciuridae	Callosciurus	Callosciurus erythraeus
79921	1	6b43d275-ebba-4fb4-a9c8-c547a5baac2f	AF079399.1	92.308	92.308	92.308|92.308	1.63e-13	1.63e-13	1.63e-13|1.63e-13	65	65	65|65	259	259	259|259	348	348	348|348	Mammalia	Rodentia	Cricetidae	Holochilus	Holochilus vulpinus
2494722	1	4b3d49a2-c612-4226-835a-3e7525c36dc3	MZ353589.1	92.063	92.063	92.063|92.063	1.92e-12	1.92e-12	1.92e-12|1.92e-12	63	63	63|63	2823	2823	2823|2823	16277	16277	16277|16277	Mammalia	Rodentia	Muridae	Lophuromys	Lophuromys simensis
1203283	1	5dc85c3e-de1a-47da-85f0-92c647fa5eeb	AF407524.1	94.118	94.118	94.118|94.118	2.64e-12	2.64e-12	2.64e-12|2.64e-12	51	51	51|51	274	274	274|274	2784	2784	2784|2784	Lepidosauria	Squamata	Varanidae	Varanus	Varanus togianus
106112	15	fba20707-e8d2-43b3-993f-fc538a3d25d2	KF769456.1	96	91.9987	90.08|96	8.17e-12	5.44667e-13	0|8.17e-12	50	713.933	50|5222	805	1810.73	213|7803	16378	16378	16378|16378	Mammalia	Rodentia	Cricetidae	Akodon	Akodon montensis
409885	2	7f4948da-c819-44d0-8e97-f3528e928154	DQ888652.1	94.545	94.545	94.545|94.545	1.04e-11	1.2e-11	1.04e-11|1.36e-11	55	55	55|55	1017	1171	1017|1325	957	957	957|957	Mammalia	Chiroptera	Hipposideridae	Aselliscus	Aselliscus tricuspidatus
409885	2	5d802fe7-7e63-4a8e-863a-087fd62fd3f8	DQ888652.1	94.545	94.545	94.545|94.545	1.36e-11	1.2e-11	1.04e-11|1.36e-11	55	55	55|55	1325	1171	1017|1325	957	957	957|957	Mammalia	Chiroptera	Hipposideridae	Aselliscus	Aselliscus tricuspidatus
32389	1	81325b0a-7c80-4b67-a919-da7de9872ddf	MG923513.1	90.278	90.278	90.278|90.278	3.53e-11	3.53e-11	3.53e-11|3.53e-11	72	72	72|72	13223	13223	13223|13223	15986	15986	15986|15986	Insecta	Hymenoptera	Pteromalidae	Pteromalus	Pteromalus puparum
1449541	1	1afce3a2-0b02-43e6-b593-1f1c3dc2b148	OM809882.1	91.935	91.935	91.935|91.935	1.32e-10	1.32e-10	1.32e-10|1.32e-10	62	62	62|62	236	236	236|236	16285	16285	16285|16285	Mammalia	Rodentia	Cricetidae	Lasiopodomys	Lasiopodomys gregalis
230187	1	a4b058d3-a2f5-460b-be84-a84bca1a4f09	MK560500.1	91.935	91.935	91.935|91.935	1.89e-10	1.89e-10	1.89e-10|1.89e-10	62	62	62|62	1212	1212	1212|1212	801	801	801|801	Mammalia	Rodentia	Cricetidae	Akodon	Akodon spegazzinii
1426894	1	cd56693c-737e-4bc6-bf04-fd626c8283b4	KY800518.1	90	90	90|90	1.24e-09	1.24e-09	1.24e-09|1.24e-09	60	60	60|60	7844	7844	7844|7844	15472	15472	15472|15472	Insecta	Lepidoptera	Erebidae	Aglaomorpha	Aglaomorpha histrio
938187	1	cf0ffc7a-b391-44a9-b19f-277abda801ce	MW751989.1	97.619	97.619	97.619|97.619	2.61e-09	2.61e-09	2.61e-09|2.61e-09	42	42	42|42	16492	16492	16492|16492	15624	15624	15624|15624	Insecta	Lepidoptera	Erebidae	Ercheia	Ercheia cyllaria
10116	1	d4ca5c48-8bc3-427c-b306-9721c3d81023	KP099715.1	92.857	92.857	92.857|92.857	4.23e-09	4.23e-09	4.23e-09|4.23e-09	56	56	56|56	1785	1785	1785|1785	16317	16317	16317|16317	Mammalia	Rodentia	Muridae	Rattus	Rattus norvegicus
932983	1	ba8ccf74-adf5-4d9d-9a84-03bff6f782d8	LC185277.1	97.222	97.222	97.222|97.222	2.96e-07	2.96e-07	2.96e-07|2.96e-07	36	36	36|36	556	556	556|556	442	442	442|442	Arachnida	Araneae	Linyphiidae	Fusciphantes	Fusciphantes hibanus
44522	1	14367ed7-ec2c-44b0-9a17-8cf621be491a	AF039066.1	100	100	100|100	5.67e-07	5.67e-07	5.67e-07|5.67e-07	34	34	34|34	15562	15562	15562|15562	16787	16787	16787|16787	NA	Testudines	Pelomedusidae	Pelomedusa	Pelomedusa subrufa
1658278	2	194d6494-f079-43f5-981c-292b04c79ca4	MW136652.1	97.059	98.5295	97.059|100	2.23e-06	2.325e-06	2.23e-06|2.42e-06	34	33	32|34	287	2335	287|4383	697	697	697|697	Amphibia	Anura	Bufonidae	Rhinella	Rhinella alata
1658278	2	9f81f70f-2551-454a-84af-ce1741841009	MW136652.1	100	98.5295	97.059|100	2.42e-06	2.325e-06	2.23e-06|2.42e-06	32	33	32|34	4383	2335	287|4383	697	697	697|697	Amphibia	Anura	Bufonidae	Rhinella	Rhinella alata
110191	1	6b75424a-bb57-4cbc-8706-b44ba2efddd7	GQ358739.1	100	100	100|100	3.75e-06	3.75e-06	3.75e-06|3.75e-06	30	30	30|30	467	467	467|467	1550	1550	1550|1550	Insecta	Coleoptera	Silphidae	Nicrophorus	Nicrophorus quadripunctatus
168631	1	213dde9e-46e7-42d8-b734-a8cefc732949	MK207057.1	94.872	94.872	94.872|94.872	3.96e-06	3.96e-06	3.96e-06|3.96e-06	39	39	39|39	492	492	492|492	15341	15341	15341|15341	Insecta	Lepidoptera	Crambidae	Chilo	Chilo suppressalis
625046	1	99611057-bd80-4ae1-9d24-f238afd4d2b2	BK012677.1	97.222	97.222	97.222|97.222	7.95e-06	7.95e-06	7.95e-06|7.95e-06	36	36	36|36	14393	14393	14393|14393	19758	19758	19758|19758	Insecta	Hymenoptera	Formicidae	Sericomyrmex	Sericomyrmex saussurei
JFD1640
subject.tax.id	Count	query.acc.ver	subject.acc.ver	X..identity	Average.X..identity	X..identity.range	evalue	Average.evalue	evalue.range	alignment.length	Average.alignment.length	alignment.length.range	query.length	Average.query.length	query.length.range	subject.length	Average.subject.length	subject.length.range	class	order	family	genus	species
867188	5	05008bca-924d-49de-b4f1-7198bcc5e84d	HM106364.1	93.013	92.7378	90.78|95.833	0	6.52e-38	0|3.26e-37	687	294.4	120|687	1716	3868.4	236|11888	1140	1058.4	721|1146	Mammalia	Didelphimorphia	Didelphidae	Marmosa	Marmosa robinsoni
91496	2	1d18d6c8-5258-4f96-8572-cecb98b90bde	AF128231.1	91.364	91.1365	90.909|91.364	0	0	0|0	579	702	579|825	2181	4163.5	2181|6146	817	817	817|817	Mammalia	Didelphimorphia	Didelphidae	Marmosa	Marmosa robinsoni
91496	2	77188e43-fe9a-4252-972d-6110a8825a68	AF128231.1	90.909	91.1365	90.909|91.364	0	0	0|0	825	702	579|825	6146	4163.5	2181|6146	817	817	817|817	Mammalia	Didelphimorphia	Didelphidae	Marmosa	Marmosa robinsoni
42719	5	67b240f0-bb59-4eba-9dd5-b9550183b020	KJ868124.1	91.726	91.2534	90.265|92.744	1.14e-143	7.08e-19	1.14e-143|3.54e-18	423	242.4	91|423	584	2549.8	484|5499	15381	12534.6	1149|15381	Mammalia	Didelphimorphia	Didelphidae	Marmosa	Marmosa demerarae
42719	5	7835ff3b-9ed1-401c-9933-2940883c4d1b	KJ868124.1	92.744	91.2534	90.265|92.744	3.5e-114	7.08e-19	1.14e-143|3.54e-18	317	242.4	91|423	2007	2549.8	484|5499	15381	12534.6	1149|15381	Mammalia	Didelphimorphia	Didelphidae	Marmosa	Marmosa demerarae
867188	5	2491f2d7-6ee3-4f16-961e-706e080bee04	HM106365.1	90.994	92.7378	90.78|95.833	2.52e-95	6.52e-38	0|3.26e-37	322	294.4	120|687	1820	3868.4	236|11888	1146	1058.4	721|1146	Mammalia	Didelphimorphia	Didelphidae	Marmosa	Marmosa robinsoni
13616	1	9a31ed06-7cde-4b9c-a59e-705ed94736e8	AF166346.1	90.592	90.592	90.592|90.592	1.54e-89	1.54e-89	1.54e-89|1.54e-89	287	287	287|287	1382	1382	1382|1382	2611	2611	2611|2611	Mammalia	Didelphimorphia	Didelphidae	Monodelphis	Monodelphis domestica
867188	5	2c7a40b9-fbd5-4806-a3a4-f498095ac03b	MT814778.1	93.069	92.7378	90.78|95.833	7.52e-71	6.52e-38	0|3.26e-37	202	294.4	120|687	236	3868.4	236|11888	721	1058.4	721|1146	Mammalia	Didelphimorphia	Didelphidae	Marmosa	Marmosa robinsoni
126295	8	f413e22a-c453-40d2-be59-2528312b4196	KJ868123.1	92.233	92.9555	90.265|97.143	2.22e-65	2.5e-07	2.22e-65|2e-06	206	120.75	35|206	1214	1991.88	385|6866	15393	13521.8	423|15393	Mammalia	Didelphimorphia	Didelphidae	Marmosa	Marmosa murina
225728	1	6814a935-1d88-4d29-8776-f618f57316ce	KT943517.1	90.043	90.043	90.043|90.043	5.73e-63	5.73e-63	5.73e-63|5.73e-63	231	231	231|231	364	364	364|364	16460	16460	16460|16460	Mammalia	Didelphimorphia	Didelphidae	Tlacuatzin	Tlacuatzin canescens
9327	1	e990ba8d-d4d8-46e8-9344-45614cb36bf1	KJ868162.1	91.748	91.748	91.748|91.748	1.96e-61	1.96e-61	1.96e-61|1.96e-61	206	206	206|206	3035	3035	3035|3035	16874	16874	16874|16874	Mammalia	Diprotodontia	Macropodidae	Thylogale	Thylogale billardierii
126295	8	ec64f2e7-326c-43a2-a640-b6dbf9b8f1ed	KJ868123.1	91.22	92.9555	90.265|97.143	2.63e-59	2.5e-07	2.22e-65|2e-06	205	120.75	35|206	6866	1991.88	385|6866	15393	13521.8	423|15393	Mammalia	Didelphimorphia	Didelphidae	Marmosa	Marmosa murina
42719	5	f82f01ee-03bf-4b9c-ac26-12912648aa4c	KJ868124.1	90.265	91.2534	90.265|92.744	8.22e-59	7.08e-19	1.14e-143|3.54e-18	226	242.4	91|423	5499	2549.8	484|5499	15381	12534.6	1149|15381	Mammalia	Didelphimorphia	Didelphidae	Marmosa	Marmosa demerarae
37698	1	77a12b49-36ba-4a20-af24-3ff0962ac827	AF358864.1	92.353	92.353	92.353|92.353	9.39e-54	9.39e-54	9.39e-54|9.39e-54	170	170	170|170	798	798	798|798	16852	16852	16852|16852	Mammalia	Peramelemorphia	Peramelidae	Isoodon	Isoodon macrourus
126299	1	ff3c013f-72a4-4d83-bc6b-ef9b1412bd37	HQ454276.1	91.813	91.813	91.813|91.813	1.16e-52	1.16e-52	1.16e-52|1.16e-52	171	171	171|171	2482	2482	2482|2482	402	402	402|402	Mammalia	Didelphimorphia	Didelphidae	Monodelphis	Monodelphis emiliae
225402	3	aa57489a-d9e6-4b00-9b38-fab98bf96a46	AJ628377.1	90.533	92.4	90.533|95.556	7.02e-45	3.05333e-10	7.02e-45|9.16e-10	169	116.333	45|169	3146	2229.33	402|3146	792	1028	792|1146	Mammalia	Didelphimorphia	Didelphidae	Marmosa	Marmosa mexicana
867188	5	b72d500e-ee91-4007-9da8-858510aa421b	HM106364.1	95.833	92.7378	90.78|95.833	8.23e-45	6.52e-38	0|3.26e-37	120	294.4	120|687	3682	3868.4	236|11888	1140	1058.4	721|1146	Mammalia	Didelphimorphia	Didelphidae	Marmosa	Marmosa robinsoni
42719	5	be6b0dd4-402d-4d68-8fe3-53046b36ea57	KJ868124.1	90.323	91.2534	90.265|92.744	3.27e-39	7.08e-19	1.14e-143|3.54e-18	155	242.4	91|423	484	2549.8	484|5499	15381	12534.6	1149|15381	Mammalia	Didelphimorphia	Didelphidae	Marmosa	Marmosa demerarae
9321	1	1b5b118a-6715-4144-a2f8-24db7c33f748	KY996501.1	90.323	90.323	90.323|90.323	8.65e-39	8.65e-39	8.65e-39|8.65e-39	155	155	155|155	1246	1246	1246|1246	17014	17014	17014|17014	Mammalia	Diprotodontia	Macropodidae	Osphranter	Osphranter rufus
47677	1	722af9e2-d5df-42d9-8269-4463590e8e36	OM022053.1	92.623	92.623	92.623|92.623	3.02e-37	3.02e-37	3.02e-37|3.02e-37	122	122	122|122	207	207	207|207	1539	1539	1539|1539	Insecta	Hymenoptera	Apidae	Inquilina	Inquilina excavata
867188	5	795b988d-f86b-407b-8855-a1fff0d921d1	HM106362.1	90.78	92.7378	90.78|95.833	3.26e-37	6.52e-38	0|3.26e-37	141	294.4	120|687	11888	3868.4	236|11888	1145	1058.4	721|1146	Mammalia	Didelphimorphia	Didelphidae	Marmosa	Marmosa robinsoni
225402	3	01d84698-e6a4-44ec-8e9d-a0be54c4e0fc	HM106355.1	91.111	92.4	90.533|95.556	7.7e-35	3.05333e-10	7.02e-45|9.16e-10	135	116.333	45|169	3140	2229.33	402|3146	1146	1028	792|1146	Mammalia	Didelphimorphia	Didelphidae	Marmosa	Marmosa mexicana
425033	1	fd874ca9-8803-4dbd-b83f-b53de3698f5a	MW193732.1	92.562	92.562	92.562|92.562	3.14e-34	3.14e-34	3.14e-34|3.14e-34	121	121	121|121	860	860	860|860	16301	16301	16301|16301	Mammalia	Rodentia	Muridae	Niviventer	Niviventer eha
85694	1	dc967806-c99b-47e9-955c-fffddf5e1b17	MT892662.1	91.339	91.339	91.339|91.339	1.3e-33	1.3e-33	1.3e-33|1.3e-33	127	127	127|127	3478	3478	3478|3478	17165	17165	17165|17165	Mammalia	Didelphimorphia	Didelphidae	Didelphis	Didelphis aurita
126295	8	410e37a6-dc15-4696-bb25-ecb6f351dffb	KJ868123.1	95.789	92.9555	90.265|97.143	2.07e-33	2.5e-07	2.22e-65|2e-06	95	120.75	35|206	385	1991.88	385|6866	15393	13521.8	423|15393	Mammalia	Didelphimorphia	Didelphidae	Marmosa	Marmosa murina
126295	8	4e28b438-5009-463f-84c8-6b8afc1af5ca	JQ478422.1	93.458	92.9555	90.265|97.143	1.41e-31	2.5e-07	2.22e-65|2e-06	107	120.75	35|206	1658	1991.88	385|6866	423	13521.8	423|15393	Mammalia	Didelphimorphia	Didelphidae	Marmosa	Marmosa murina
38629	1	0221cb4f-1007-4de9-be96-4fdde4b27d61	KJ868126.1	92.553	92.553	92.553|92.553	3.68e-27	3.68e-27	3.68e-27|3.68e-27	94	94	94|94	824	824	824|824	15380	15380	15380|15380	Mammalia	Peramelemorphia	Peroryctidae	Microperoryctes	Microperoryctes longicauda
126295	8	9f7377fb-ccf0-4fbc-b4ed-40bcc7cadfa7	KJ868123.1	91.228	92.9555	90.265|97.143	4.26e-27	2.5e-07	2.22e-65|2e-06	114	120.75	35|206	950	1991.88	385|6866	15393	13521.8	423|15393	Mammalia	Didelphimorphia	Didelphidae	Marmosa	Marmosa murina
38620	7	dbf18857-ffdb-4834-9176-e6d5bd972470	MT892667.1	91.919	93.2804	90.323|96.491	6.53e-26	4.30431e-07	6.53e-26|2.75e-06	99	69.1429	46|99	959	4653	849|10743	17265	17265	17265|17265	Mammalia	Didelphimorphia	Didelphidae	Lutreolina	Lutreolina crassicaudata
1914731	1	45bb8d60-cea4-4574-8da1-e9ca21798fcf	KY065942.1	92.157	92.157	92.157|92.157	9.33e-26	9.33e-26	9.33e-26|9.33e-26	102	102	102|102	365	365	365|365	979	979	979|979	Actinopteri	Syngnathiformes	Syngnathidae	Micrognathus	Micrognathus natans
38620	7	02c303fb-07db-4c7c-b063-d83e75ff98fb	MT892667.1	94.253	93.2804	90.323|96.491	1.03e-25	4.30431e-07	6.53e-26|2.75e-06	87	69.1429	46|99	5782	4653	849|10743	17265	17265	17265|17265	Mammalia	Didelphimorphia	Didelphidae	Lutreolina	Lutreolina crassicaudata
126295	8	89512033-233d-4e08-8bba-aa41591c0c7e	KJ868123.1	90.265	92.9555	90.265|97.143	4.37e-23	2.5e-07	2.22e-65|2e-06	113	120.75	35|206	2745	1991.88	385|6866	15393	13521.8	423|15393	Mammalia	Didelphimorphia	Didelphidae	Marmosa	Marmosa murina
126295	8	84289108-87ef-4809-8a57-377b40295b48	KJ868123.1	92.308	92.9555	90.265|97.143	4.24e-21	2.5e-07	2.22e-65|2e-06	91	120.75	35|206	1168	1991.88	385|6866	15393	13521.8	423|15393	Mammalia	Didelphimorphia	Didelphidae	Marmosa	Marmosa murina
1150459	1	02997544-6d8a-492f-a74d-8248daa379cf	HQ564280.1	93.827	93.827	93.827|93.827	1.82e-20	1.82e-20	1.82e-20|1.82e-20	81	81	81|81	4947	4947	4947|4947	652	652	652|652	Actinopteri	Clupeiformes	Engraulidae	Thryssa	Thryssa mystax
30195	1	5a1798fe-a88d-4f43-b95a-f63d6ed47aff	OU342939.1	100	100	100|100	2.59e-20	2.59e-20	2.59e-20|2.59e-20	56	56	56|56	7044	7044	7044|7044	24708	24708	24708|24708	Insecta	Hymenoptera	Apidae	Bombus	Bombus terrestris
29139	1	29947b62-c02e-4fd8-bb22-25b9fe130205	MK360903.1	100	100	100|100	5.92e-19	5.92e-19	5.92e-19|5.92e-19	52	52	52|52	717	717	717|717	16998	16998	16998|16998	Mammalia	Diprotodontia	Vombatidae	Vombatus	Vombatus ursinus
42719	5	173da34a-ee6b-4094-9ee9-9bd2a9aef163	MN978623.1	91.209	91.2534	90.265|92.744	3.54e-18	7.08e-19	1.14e-143|3.54e-18	91	242.4	91|423	4175	2549.8	484|5499	1149	12534.6	1149|15381	Mammalia	Didelphimorphia	Didelphidae	Marmosa	Marmosa demerarae
38620	7	84a34066-edc3-4cc4-811e-11f046eb6483	MT892667.1	93.056	93.2804	90.323|96.491	5.4e-16	4.30431e-07	6.53e-26|2.75e-06	72	69.1429	46|99	10743	4653	849|10743	17265	17265	17265|17265	Mammalia	Didelphimorphia	Didelphidae	Lutreolina	Lutreolina crassicaudata
38620	7	3c8b787a-229a-4c5c-8233-11c41449df64	MT892667.1	96.491	93.2804	90.323|96.491	6.33e-16	4.30431e-07	6.53e-26|2.75e-06	57	69.1429	46|99	849	4653	849|10743	17265	17265	17265|17265	Mammalia	Didelphimorphia	Didelphidae	Lutreolina	Lutreolina crassicaudata
190651	1	cb509109-0ed7-4b02-90b6-8df6deeca452	KJ868105.1	91.026	91.026	91.026|91.026	5.09e-14	5.09e-14	5.09e-14|5.09e-14	78	78	78|78	1146	1146	1146|1146	15372	15372	15372|15372	Mammalia	Diprotodontia	Burramyidae	Cercartetus	Cercartetus concinnus
65610	1	9ee314e8-071a-4b5b-9a87-0fb307ca398b	KJ868114.1	94.828	94.828	94.828|94.828	4.74e-13	4.74e-13	4.74e-13|4.74e-13	58	58	58|58	10505	10505	10505|10505	15386	15386	15386|15386	Mammalia	Peramelemorphia	Peroryctidae	Echymipera	Echymipera clara
208481	1	d7278369-0d4a-4909-a01f-eea8045940c1	EU871947.1	92.982	92.982	92.982|92.982	8.94e-12	8.94e-12	8.94e-12|8.94e-12	57	57	57|57	13044	13044	13044|13044	18728	18728	18728|18728	Insecta	Hymenoptera	Ichneumonidae	Diadegma	Diadegma semiclausum
38620	7	ff0549bc-c08e-46eb-8ea3-ba4af0d8ea0b	MT892667.1	93.443	93.2804	90.323|96.491	1.52e-11	4.30431e-07	6.53e-26|2.75e-06	61	69.1429	46|99	5701	4653	849|10743	17265	17265	17265|17265	Mammalia	Didelphimorphia	Didelphidae	Lutreolina	Lutreolina crassicaudata
225402	3	a99ed33d-70de-458d-a014-da6698ac1b90	MG029659.1	95.556	92.4	90.533|95.556	9.16e-10	3.05333e-10	7.02e-45|9.16e-10	45	116.333	45|169	402	2229.33	402|3146	1146	1028	792|1146	Mammalia	Didelphimorphia	Didelphidae	Marmosa	Marmosa mexicana
38620	7	a9442f70-e223-4e25-abef-f2cdcede9588	MT892667.1	90.323	93.2804	90.323|96.491	2.63e-07	4.30431e-07	6.53e-26|2.75e-06	62	69.1429	46|99	7240	4653	849|10743	17265	17265	17265|17265	Mammalia	Didelphimorphia	Didelphidae	Lutreolina	Lutreolina crassicaudata
126295	8	0ffa6413-d8aa-44a5-b83e-8b3d20bfaa72	KJ868123.1	97.143	92.9555	90.265|97.143	2e-06	2.5e-07	2.22e-65|2e-06	35	120.75	35|206	949	1991.88	385|6866	15393	13521.8	423|15393	Mammalia	Didelphimorphia	Didelphidae	Marmosa	Marmosa murina
38620	7	c3db03f4-b296-4409-84ae-3b88cd93edfa	MT892667.1	93.478	93.2804	90.323|96.491	2.75e-06	4.30431e-07	6.53e-26|2.75e-06	46	69.1429	46|99	1297	4653	849|10743	17265	17265	17265|17265	Mammalia	Didelphimorphia	Didelphidae	Lutreolina	Lutreolina crassicaudata
JFD1639
subject.tax.id	Count	query.acc.ver	subject.acc.ver	X..identity	Average.X..identity	X..identity.range	evalue	Average.evalue	evalue.range	alignment.length	Average.alignment.length	alignment.length.range	query.length	Average.query.length	query.length.range	subject.length	Average.subject.length	subject.length.range	class	order	family	genus	species
91496	5	9b3c4431-ecbe-4869-b1bd-8784a589ea85	AF128231.1	92.382	91.3116	90.617|92.382	0	1.24e-26	0|6.2e-26	827	497.2	112|831	5197	4990.8	250|12207	817	880.8	817|1136	Mammalia	Didelphimorphia	Didelphidae	Marmosa	Marmosa robinsoni
91496	5	a1b11309-884d-4d91-80a8-ab88d0ea35b3	AF128231.1	91.817	91.3116	90.617|92.382	0	1.24e-26	0|6.2e-26	831	497.2	112|831	12207	4990.8	250|12207	817	880.8	817|1136	Mammalia	Didelphimorphia	Didelphidae	Marmosa	Marmosa robinsoni
867188	3	312e936a-b939-431f-8bd6-34db749dd831	MT814778.1	90.909	91.2983	90.909|92	0	3.6e-65	0|1.08e-64	737	430.667	200|737	6063	2719.33	579|6063	721	1000.33	721|1140	Mammalia	Didelphimorphia	Didelphidae	Marmosa	Marmosa robinsoni
13616	2	925a8d64-5760-46e8-99d2-a7184586cfd2	AF166346.1	90.701	91.199	90.701|91.697	0	1.805e-88	0|3.61e-88	699	488	277|699	2305	2215.5	2126|2305	2611	2611	2611|2611	Mammalia	Didelphimorphia	Didelphidae	Monodelphis	Monodelphis domestica
225402	6	38b1a4ac-6185-4f15-abba-84f5797cba0e	JF457773.1	90.229	91.4055	90.229|93.162	0	5.53534e-31	0|3.31e-30	655	283.333	117|655	1819	4219	1635|9861	657	842.5	657|1146	Mammalia	Didelphimorphia	Didelphidae	Marmosa	Marmosa mexicana
225402	6	05e529bc-d8bd-4752-a7c9-9156ae312497	JF457789.1	90.617	91.4055	90.229|93.162	4.19e-117	5.53534e-31	0|3.31e-30	405	283.333	117|655	2153	4219	1635|9861	657	842.5	657|1146	Mammalia	Didelphimorphia	Didelphidae	Marmosa	Marmosa mexicana
91496	5	973110b8-d5d5-41df-918d-3b06f2a9eca5	AF128231.1	90.617	91.3116	90.617|92.382	2.02e-116	1.24e-26	0|6.2e-26	373	497.2	112|831	2662	4990.8	250|12207	817	880.8	817|1136	Mammalia	Didelphimorphia	Didelphidae	Marmosa	Marmosa robinsoni
867188	3	0019d1c9-0a0e-4633-8c67-e92f4ae4de24	HM106364.1	90.986	91.2983	90.909|92	3.44e-111	3.6e-65	0|1.08e-64	355	430.667	200|737	579	2719.33	579|6063	1140	1000.33	721|1140	Mammalia	Didelphimorphia	Didelphidae	Marmosa	Marmosa robinsoni
126295	14	6636ced5-02ea-49aa-a36e-fbd145d65d3b	KJ868123.1	91.218	92.4216	90|95.918	1.81e-110	1.11088e-08	1.81e-110|1.14e-07	353	146.286	41|353	772	4699.5	586|13198	15393	15393	15393|15393	Mammalia	Didelphimorphia	Didelphidae	Marmosa	Marmosa murina
91496	5	428ec5e7-77a5-424c-b518-d968389e915d	AF128231.1	90.671	91.3116	90.617|92.382	4.33e-109	1.24e-26	0|6.2e-26	343	497.2	112|831	4638	4990.8	250|12207	817	880.8	817|1136	Mammalia	Didelphimorphia	Didelphidae	Marmosa	Marmosa robinsoni
42719	13	88a94b6c-a469-453e-a365-c90124b6564c	KJ868124.1	90.27	92.8611	90|100	1.87e-105	1.92808e-07	1.87e-105|2.42e-06	370	149.231	31|370	397	5635.77	397|15679	15381	15381	15381|15381	Mammalia	Didelphimorphia	Didelphidae	Marmosa	Marmosa demerarae
13616	2	5651b1f6-d2c7-4e5e-8ccc-7f1c83e8d1b7	AF166346.1	91.697	91.199	90.701|91.697	3.61e-88	1.805e-88	0|3.61e-88	277	488	277|699	2126	2215.5	2126|2305	2611	2611	2611|2611	Mammalia	Didelphimorphia	Didelphidae	Monodelphis	Monodelphis domestica
225402	6	da3aaf32-071c-48e9-80bd-ecaf523d9dc0	AJ628377.1	91.255	91.4055	90.229|93.162	8.71e-82	5.53534e-31	0|3.31e-30	263	283.333	117|655	1635	4219	1635|9861	792	842.5	657|1146	Mammalia	Didelphimorphia	Didelphidae	Marmosa	Marmosa mexicana
191870	2	268e2673-5810-4a00-ab24-41799552d5b9	NC_054268.1	91.985	92.3845	91.985|92.784	2.28e-81	7.9e-24	2.28e-81|1.58e-23	262	179.5	97|262	16530	15743.5	14957|16530	16336	16336	16336|16336	Mammalia	Didelphimorphia	Didelphidae	Gracilinanus	Gracilinanus agilis
42719	13	c7868f07-a3ef-4c30-8110-4d10800ff4b5	KJ868124.1	91.667	92.8611	90|100	8.33e-68	1.92808e-07	1.87e-105|2.42e-06	228	149.231	31|370	15679	5635.77	397|15679	15381	15381	15381|15381	Mammalia	Didelphimorphia	Didelphidae	Marmosa	Marmosa demerarae
42719	13	d55a9523-c79c-4a6c-9269-63e553fd4361	KJ868124.1	90.351	92.8611	90|100	6.17e-65	1.92808e-07	1.87e-105|2.42e-06	228	149.231	31|370	3335	5635.77	397|15679	15381	15381	15381|15381	Mammalia	Didelphimorphia	Didelphidae	Marmosa	Marmosa demerarae
867188	3	ac54aef9-fc9e-443f-a63e-5b54408c90a9	HM106364.1	92	91.2983	90.909|92	1.08e-64	3.6e-65	0|1.08e-64	200	430.667	200|737	1516	2719.33	579|6063	1140	1000.33	721|1140	Mammalia	Didelphimorphia	Didelphidae	Marmosa	Marmosa robinsoni
42719	13	49e74d08-9acf-47c5-8591-c3c1c4463d26	KJ868124.1	91.071	92.8611	90|100	2.16e-64	1.92808e-07	1.87e-105|2.42e-06	224	149.231	31|370	785	5635.77	397|15679	15381	15381	15381|15381	Mammalia	Didelphimorphia	Didelphidae	Marmosa	Marmosa demerarae
42719	13	352a71cc-fee8-4f86-852a-a1f7c32caa22	KJ868124.1	90	92.8611	90|100	1.19e-62	1.92808e-07	1.87e-105|2.42e-06	230	149.231	31|370	10796	5635.77	397|15679	15381	15381	15381|15381	Mammalia	Didelphimorphia	Didelphidae	Marmosa	Marmosa demerarae
126295	14	7fd0fb9a-e1fd-4307-946e-bbc99c278746	KJ868123.1	92.233	92.4216	90|95.918	1.42e-62	1.11088e-08	1.81e-110|1.14e-07	206	146.286	41|353	12936	4699.5	586|13198	15393	15393	15393|15393	Mammalia	Didelphimorphia	Didelphidae	Marmosa	Marmosa murina
126295	14	ac4366a5-4d7f-4627-9fce-2def3dee0315	KJ868123.1	91.262	92.4216	90|95.918	5.65e-62	1.11088e-08	1.81e-110|1.14e-07	206	146.286	41|353	13198	4699.5	586|13198	15393	15393	15393|15393	Mammalia	Didelphimorphia	Didelphidae	Marmosa	Marmosa murina
42719	13	4a138856-24ce-4a02-a25e-11b511391b16	KJ868124.1	90.625	92.8611	90|100	2.66e-60	1.92808e-07	1.87e-105|2.42e-06	224	149.231	31|370	2708	5635.77	397|15679	15381	15381	15381|15381	Mammalia	Didelphimorphia	Didelphidae	Marmosa	Marmosa demerarae
126295	14	58201493-9532-4935-9fc3-8b658996c686	KJ868123.1	91.262	92.4216	90|95.918	9.7e-60	1.11088e-08	1.81e-110|1.14e-07	206	146.286	41|353	668	4699.5	586|13198	15393	15393	15393|15393	Mammalia	Didelphimorphia	Didelphidae	Marmosa	Marmosa murina
126295	14	3af9a4d5-68bb-4d13-b2a1-b8e3f0b433a7	KJ868123.1	91.22	92.4216	90|95.918	2.64e-58	1.11088e-08	1.81e-110|1.14e-07	205	146.286	41|353	1180	4699.5	586|13198	15393	15393	15393|15393	Mammalia	Didelphimorphia	Didelphidae	Marmosa	Marmosa murina
126295	14	12238301-791d-4523-bc02-5d51e546ad0e	KJ868123.1	90	92.4216	90|95.918	4.36e-55	1.11088e-08	1.81e-110|1.14e-07	210	146.286	41|353	2155	4699.5	586|13198	15393	15393	15393|15393	Mammalia	Didelphimorphia	Didelphidae	Marmosa	Marmosa murina
9305	1	b044ccc6-6db3-44a6-ac52-58f63db62a9a	MG957242.1	91.257	91.257	91.257|91.257	6.82e-51	6.82e-51	6.82e-51|6.82e-51	183	183	183|183	9556	9556	9556|9556	8954	8954	8954|8954	Mammalia	Dasyuromorphia	Dasyuridae	Sarcophilus	Sarcophilus harrisii
461399	2	60889c71-42d8-4935-90c7-4a4e1d2af7a1	MT892663.1	90.256	90.128	90|90.256	2e-50	8.1001e-46	2e-50|1.62e-45	195	187.5	180|195	1863	1303	743|1863	17161	17161	17161|17161	Mammalia	Didelphimorphia	Didelphidae	Didelphis	Didelphis imperfecta
126295	14	6018f23c-a197-437a-ad79-170c2171f132	KJ868123.1	90.104	92.4216	90|95.918	1.37e-48	1.11088e-08	1.81e-110|1.14e-07	192	146.286	41|353	2154	4699.5	586|13198	15393	15393	15393|15393	Mammalia	Didelphimorphia	Didelphidae	Marmosa	Marmosa murina
994805	1	6174f35e-407e-4c72-88b5-27d61f90d320	MT892665.1	90.395	90.395	90.395|90.395	1.93e-47	1.93e-47	1.93e-47|1.93e-47	177	177	177|177	2001	2001	2001|2001	17427	17427	17427|17427	Mammalia	Didelphimorphia	Didelphidae	Didelphis	Didelphis pernigra
38776	1	c43e84c3-dc4e-4e3e-a72a-ec6ed46c883c	KJ868143.1	92.258	92.258	92.258|92.258	1.03e-46	1.03e-46	1.03e-46|1.03e-46	155	155	155|155	10566	10566	10566|10566	15395	15395	15395|15395	Mammalia	Dasyuromorphia	Dasyuridae	Phascogale	Phascogale calura
461399	2	e1a1bbc4-9c9f-424a-89de-083383e768c4	MT892663.1	90	90.128	90|90.256	1.62e-45	8.1001e-46	2e-50|1.62e-45	180	187.5	180|195	743	1303	743|1863	17161	17161	17161|17161	Mammalia	Didelphimorphia	Didelphidae	Didelphis	Didelphis imperfecta
38620	23	a5210a9e-2fbe-4250-a351-e4a2ccab41ca	MT892667.1	90.566	92.905	90.11|97.826	1.91e-45	4.11018e-07	1.91e-45|4.15e-06	159	73.1739	40|159	239	5600.52	239|16610	17265	17265	17265|17265	Mammalia	Didelphimorphia	Didelphidae	Lutreolina	Lutreolina crassicaudata
225728	3	f827496b-c3bf-4ff9-9d74-cb6246ec4092	KT943517.1	91.25	91.5367	91.25|91.781	3.76e-44	3.63333e-14	3.76e-44|1.09e-13	160	109.333	73|160	304	6319	304|9405	16460	16460	16460|16460	Mammalia	Didelphimorphia	Didelphidae	Tlacuatzin	Tlacuatzin canescens
42716	2	d9bcd14c-cb56-4b2d-bdbc-404bb805a0fc	MT892661.1	90.323	92.9225	90.323|95.522	6.06e-39	7.9e-21	6.06e-39|1.58e-20	155	111	67|155	880	1000	880|1120	17341	17341	17341|17341	Mammalia	Didelphimorphia	Didelphidae	Didelphis	Didelphis albiventris
1875755	1	4596bf4a-1836-40a7-8c61-ee1522993316	MT483624.1	90.972	90.972	90.972|90.972	1.23e-37	1.23e-37	1.23e-37|1.23e-37	144	144	144|144	4482	4482	4482|4482	15340	15340	15340|15340	Insecta	Trichoptera	Limnephilidae	Nemotaulius	Nemotaulius punctatolineatus
225402	6	d7e49d0c-9425-4abe-839a-b981a75cbeb1	JF457766.1	92.8	91.4055	90.229|93.162	3.42e-36	5.53534e-31	0|3.31e-30	125	283.333	117|655	2124	4219	1635|9861	657	842.5	657|1146	Mammalia	Didelphimorphia	Didelphidae	Marmosa	Marmosa mexicana
926694	1	0f63d456-4dfb-49b8-bc3e-c0357ae75955	KJ868112.1	90.196	90.196	90.196|90.196	5e-36	5e-36	5e-36|5e-36	153	153	153|153	224	224	224|224	15378	15378	15378|15378	Mammalia	Diprotodontia	Macropodidae	Dorcopsis	Dorcopsis hageni
2954915	1	320b5a6e-167d-4312-b1a9-a12ce6e0ad83	MZ131562.1	90.78	90.78	90.78|90.78	6.71e-35	6.71e-35	6.71e-35|6.71e-35	141	141	141|141	719	719	719|719	16232	16232	16232|16232	Mammalia	Rodentia	Muridae	Praomys	Praomys daltoni complex sp. clade C1
2865256	1	9b4cb6f8-3bbd-4c75-a9a6-b9bdf462cb2e	OK244803.1	95.745	95.745	95.745|95.745	3.85e-34	3.85e-34	3.85e-34|3.85e-34	94	94	94|94	15602	15602	15602|15602	14576	14576	14576|14576	Gymnolaemata	Cheilostomatida	Chaperiidae	Chaperiopsis	Chaperiopsis cf. patula BLEED1889
65612	1	4409c980-e55c-48c7-8393-be9c1d4d11ec	KJ868116.1	90.345	90.345	90.345|90.345	1.79e-33	1.79e-33	1.79e-33|1.79e-33	145	145	145|145	1246	1246	1246|1246	15365	15365	15365|15365	Mammalia	Peramelemorphia	Peramelidae	Isoodon	Isoodon obesulus
32556	1	9f30a2a9-2c83-480f-8c38-4bc5f36c8b9c	KJ868147.1	93.694	93.694	93.694|93.694	1.83e-33	1.83e-33	1.83e-33|1.83e-33	111	111	111|111	4901	4901	4901|4901	15423	15423	15423|15423	Mammalia	Dasyuromorphia	Dasyuridae	Planigale	Planigale gilesi
225402	6	1b7811c7-1d35-4432-8e1e-07a693153238	MG029659.1	93.162	91.4055	90.229|93.162	1.12e-32	5.53534e-31	0|3.31e-30	117	283.333	117|655	7722	4219	1635|9861	1146	842.5	657|1146	Mammalia	Didelphimorphia	Didelphidae	Marmosa	Marmosa mexicana
717634	1	0356caad-dde8-43eb-8132-4ef07cb2cb45	FN666602.1	92.562	92.562	92.562|92.562	1.68e-32	1.68e-32	1.68e-32|1.68e-32	121	121	121|121	11517	11517	11517|11517	15434	15434	15434|15434	Mammalia	Dasyuromorphia	Dasyuridae	Planigale	Planigale sp. AJ-2010
38620	23	92a4bee1-a2ac-4fa3-b20d-a2c64765a243	MT892667.1	93.333	92.905	90.11|97.826	1.77e-32	4.11018e-07	1.91e-45|4.15e-06	105	73.1739	40|159	820	5600.52	239|16610	17265	17265	17265|17265	Mammalia	Didelphimorphia	Didelphidae	Lutreolina	Lutreolina crassicaudata
85694	1	4cec2ae4-f543-4ece-a02b-0a775fc0b298	MT892662.1	90.984	90.984	90.984|90.984	4.11e-32	4.11e-32	4.11e-32|4.11e-32	122	122	122|122	1878	1878	1878|1878	17165	17165	17165|17165	Mammalia	Didelphimorphia	Didelphidae	Didelphis	Didelphis aurita
1692439	1	49d602a5-e234-4942-bb81-da33b832dda9	MG079490.1	92.661	92.661	92.661|92.661	1.12e-31	1.12e-31	1.12e-31|1.12e-31	109	109	109|109	5061	5061	5061|5061	632	632	632|632	Insecta	Diptera	Heleomyzidae	Suillia	Suillia longipennis
126295	14	6676fe9c-96e8-44ec-a77a-a037fe67d358	KJ868123.1	93.396	92.4216	90|95.918	7.71e-31	1.11088e-08	1.81e-110|1.14e-07	106	146.286	41|353	8955	4699.5	586|13198	15393	15393	15393|15393	Mammalia	Didelphimorphia	Didelphidae	Marmosa	Marmosa murina
47677	1	6d2fbf9c-e0fe-43b0-9bad-489d6daeca01	OM022053.1	91.453	91.453	91.453|91.453	1.26e-30	1.26e-30	1.26e-30|1.26e-30	117	117	117|117	268	268	268|268	1539	1539	1539|1539	Insecta	Hymenoptera	Apidae	Inquilina	Inquilina excavata
297337	1	e3458773-eb63-4e52-9422-5587938dff28	OQ076901.1	93.939	93.939	93.939|93.939	3.13e-30	3.13e-30	3.13e-30|3.13e-30	99	99	99|99	2412	2412	2412|2412	16907	16907	16907|16907	Mammalia	Rodentia	Castoridae	Castor	Castor fiber
225402	6	b8759341-bd46-4c2c-9734-63858aaa53b6	HM106355.1	90.37	91.4055	90.229|93.162	3.31e-30	5.53534e-31	0|3.31e-30	135	283.333	117|655	9861	4219	1635|9861	1146	842.5	657|1146	Mammalia	Didelphimorphia	Didelphidae	Marmosa	Marmosa mexicana
164528	3	20f0c0c9-8302-49b4-aa72-4d8a85d57f8f	AY795975.1	92.661	92.6677	91.111|94.231	6.28e-29	1.84e-09	6.28e-29|5.52e-09	109	83.6667	52|109	12329	7893.33	2376|12329	16642	16642	16642|16642	Mammalia	Peramelemorphia	Peroryctidae	Echymipera	Echymipera rufescens
943244	1	b23b9f97-29bb-4da0-b389-7190f5880858	HQ454250.1	90.076	90.076	90.076|90.076	7.61e-28	7.61e-28	7.61e-28|7.61e-28	131	131	131|131	2539	2539	2539|2539	402	402	402|402	Mammalia	Didelphimorphia	Didelphidae	Monodelphis	Monodelphis glirina
60261	1	407c9602-3186-4a76-9293-a22eef11a1ee	MK784236.1	92.929	92.929	92.929|92.929	5.27e-27	5.27e-27	5.27e-27|5.27e-27	99	99	99|99	1169	1169	1169|1169	17554	17554	17554|17554	Actinopteri	Cyprinodontiformes	Nothobranchiidae	Fundulopanchax	Fundulopanchax filamentosus
425033	1	ce57e49d-9699-4991-9d65-d92d738a848e	MW193732.1	90	90	90|90	5.72e-27	5.72e-27	5.72e-27|5.72e-27	120	120	120|120	1268	1268	1268|1268	16301	16301	16301|16301	Mammalia	Rodentia	Muridae	Niviventer	Niviventer eha
38620	23	e59b498c-6b6c-4ed2-a09c-f815431c4ffc	MT892667.1	92.157	92.905	90.11|97.826	7.38e-27	4.11018e-07	1.91e-45|4.15e-06	102	73.1739	40|159	1630	5600.52	239|16610	17265	17265	17265|17265	Mammalia	Didelphimorphia	Didelphidae	Lutreolina	Lutreolina crassicaudata
91496	5	d12284c4-d591-4595-9c4a-c7c2fb988cd9	KM099932.1	91.071	91.3116	90.617|92.382	6.2e-26	1.24e-26	0|6.2e-26	112	497.2	112|831	250	4990.8	250|12207	1136	880.8	817|1136	Mammalia	Didelphimorphia	Didelphidae	Marmosa	Marmosa robinsoni
38620	23	ea81c6d8-f179-4b67-8077-e2252729c2d2	MT892667.1	93.333	92.905	90.11|97.826	9.32e-26	4.11018e-07	1.91e-45|4.15e-06	90	73.1739	40|159	5233	5600.52	239|16610	17265	17265	17265|17265	Mammalia	Didelphimorphia	Didelphidae	Lutreolina	Lutreolina crassicaudata
42719	13	6d603429-5579-4fac-b7c7-a73094246574	KJ868124.1	96.154	92.8611	90|100	5.05e-25	1.92808e-07	1.87e-105|2.42e-06	78	149.231	31|370	7274	5635.77	397|15679	15381	15381	15381|15381	Mammalia	Didelphimorphia	Didelphidae	Marmosa	Marmosa demerarae
191871	1	e118a2c7-6a78-4c91-88d7-2b4b6832b208	AJ508401.2	95.062	95.062	95.062|95.062	6.24e-25	6.24e-25	6.24e-25|6.24e-25	81	81	81|81	8995	8995	8995|8995	15452	15452	15452|15452	Mammalia	Didelphimorphia	Didelphidae	Thylamys	Thylamys elegans
126295	14	85659cca-e658-4cdf-895f-f27081a45f4c	KJ868123.1	95	92.4216	90|95.918	4.68e-24	1.11088e-08	1.81e-110|1.14e-07	80	146.286	41|353	1157	4699.5	586|13198	15393	15393	15393|15393	Mammalia	Didelphimorphia	Didelphidae	Marmosa	Marmosa murina
191870	2	fe5e0fe7-997d-4201-93d0-c0575d5e2bb4	NC_054268.1	92.784	92.3845	91.985|92.784	1.58e-23	7.9e-24	2.28e-81|1.58e-23	97	179.5	97|262	14957	15743.5	14957|16530	16336	16336	16336|16336	Mammalia	Didelphimorphia	Didelphidae	Gracilinanus	Gracilinanus agilis
38620	23	8dc9776b-fba9-4a0b-ba5b-29c69a81f0cb	MT892667.1	90.566	92.905	90.11|97.826	4.28e-22	4.11018e-07	1.91e-45|4.15e-06	106	73.1739	40|159	6874	5600.52	239|16610	17265	17265	17265|17265	Mammalia	Didelphimorphia	Didelphidae	Lutreolina	Lutreolina crassicaudata
38620	23	1b5447db-9fb7-41d9-958d-701f6cf106da	MT892667.1	91.579	92.905	90.11|97.826	1.17e-21	4.11018e-07	1.91e-45|4.15e-06	95	73.1739	40|159	4811	5600.52	239|16610	17265	17265	17265|17265	Mammalia	Didelphimorphia	Didelphidae	Lutreolina	Lutreolina crassicaudata
225728	3	692ae314-130b-42da-8bef-176f4095a466	KT943517.1	91.579	91.5367	91.25|91.781	8.75e-21	3.63333e-14	3.76e-44|1.09e-13	95	109.333	73|160	9248	6319	304|9405	16460	16460	16460|16460	Mammalia	Didelphimorphia	Didelphidae	Tlacuatzin	Tlacuatzin canescens
225729	1	12d53a09-7fc0-4227-91a8-42d950d48dfe	JQ478415.1	90.217	90.217	90.217|90.217	1.03e-20	1.03e-20	1.03e-20|1.03e-20	92	92	92|92	738	738	738|738	697	697	697|697	Mammalia	Didelphimorphia	Didelphidae	Marmosa	Marmosa paraguayana
42716	2	32ec5e32-118f-4fbf-8e99-d6011ba71b7a	MT892661.1	95.522	92.9225	90.323|95.522	1.58e-20	7.9e-21	6.06e-39|1.58e-20	67	111	67|155	1120	1000	880|1120	17341	17341	17341|17341	Mammalia	Didelphimorphia	Didelphidae	Didelphis	Didelphis albiventris
38620	23	179a168b-9f92-4c89-9522-78a893d35d0f	MT892667.1	91.954	92.905	90.11|97.826	2.39e-19	4.11018e-07	1.91e-45|4.15e-06	87	73.1739	40|159	16610	5600.52	239|16610	17265	17265	17265|17265	Mammalia	Didelphimorphia	Didelphidae	Lutreolina	Lutreolina crassicaudata
33562	1	1f7c843f-acf3-4581-b996-793f73e0d21d	AJ508402.2	90	90	90|90	2.96e-19	2.96e-19	2.96e-19|2.96e-19	100	100	100|100	1372	1372	1372|1372	15350	15350	15350|15350	Mammalia	Microbiotheria	Microbiotheriidae	Dromiciops	Dromiciops gliroides
164528	3	d23695cc-31ea-42c1-90d6-f74d5e7d66c7	AY795975.1	91.111	92.6677	91.111|94.231	5.15e-19	1.84e-09	6.28e-29|5.52e-09	90	83.6667	52|109	2376	7893.33	2376|12329	16642	16642	16642|16642	Mammalia	Peramelemorphia	Peroryctidae	Echymipera	Echymipera rufescens
112022	1	efab9695-af17-4357-af8d-10729becf6e3	KM362831.1	92.593	92.593	92.593|92.593	5.2e-19	5.2e-19	5.2e-19|5.2e-19	81	81	81|81	2402	2402	2402|2402	17438	17438	17438|17438	Mammalia	Lagomorpha	Leporidae	Lepus	Lepus sinensis
62282	2	b930c8eb-02f9-4981-9ad1-8bc8ec902fc2	MN122912.1	91.304	91.277	91.25|91.304	1.03e-18	1.21515e-16	1.03e-18|2.42e-16	92	86	80|92	1227	782.5	338|1227	16188	16188	16188|16188	Mammalia	Eulipotyphla	Soricidae	Neomys	Neomys fodiens
38620	23	625bbd41-62d7-413f-aa38-4f8e2c625e83	MT892667.1	90.11	92.905	90.11|97.826	4.14e-18	4.11018e-07	1.91e-45|4.15e-06	91	73.1739	40|159	1267	5600.52	239|16610	17265	17265	17265|17265	Mammalia	Didelphimorphia	Didelphidae	Lutreolina	Lutreolina crassicaudata
2932462	2	3a020538-3a24-4256-b16e-7cc24cbb2121	MT663340.1	93.151	93.545	93.151|93.939	4.85e-18	6.2425e-17	4.85e-18|1.2e-16	73	69.5	66|73	5710	7497.5	5710|9285	15463	15463	15463|15463	Mammalia	Peramelemorphia	Peroryctidae	Microperoryctes	Microperoryctes murina
38629	1	cd4512d6-cfeb-4382-bd0c-ee66e5dd49a9	KJ868126.1	96.61	96.61	96.61|96.61	7.57e-18	7.57e-18	7.57e-18|7.57e-18	59	59	59|59	607	607	607|607	15380	15380	15380|15380	Mammalia	Peramelemorphia	Peroryctidae	Microperoryctes	Microperoryctes longicauda
42719	13	b6d966b5-5f90-4b00-87c1-3a9ddb445906	KJ868124.1	91.304	92.8611	90|100	1.32e-17	1.92808e-07	1.87e-105|2.42e-06	92	149.231	31|370	15544	5635.77	397|15679	15381	15381	15381|15381	Mammalia	Didelphimorphia	Didelphidae	Marmosa	Marmosa demerarae
38620	23	f8fdb9d6-e612-4cb0-bb37-40894420a27f	MT892667.1	93.151	92.905	90.11|97.826	2.44e-17	4.11018e-07	1.91e-45|4.15e-06	73	73.1739	40|159	1909	5600.52	239|16610	17265	17265	17265|17265	Mammalia	Didelphimorphia	Didelphidae	Lutreolina	Lutreolina crassicaudata
2022013	1	28f0fa21-7dd2-4229-b6e6-2f7b9f477380	KX529108.1	96.721	96.721	96.721|96.721	4.72e-17	4.72e-17	4.72e-17|4.72e-17	61	61	61|61	14231	14231	14231|14231	16773	16773	16773|16773	Mammalia	Rodentia	Anomaluridae	Anomalurus	Anomalurus pusillus
2932462	2	4d910f5f-9dcc-4fd6-9759-46ff8d0a8cac	MT663340.1	93.939	93.545	93.151|93.939	1.2e-16	6.2425e-17	4.85e-18|1.2e-16	66	69.5	66|73	9285	7497.5	5710|9285	15463	15463	15463|15463	Mammalia	Peramelemorphia	Peroryctidae	Microperoryctes	Microperoryctes murina
62282	2	1a3bd2d3-ac5b-4958-8c72-765ac141083a	MN122912.1	91.25	91.277	91.25|91.304	2.42e-16	1.21515e-16	1.03e-18|2.42e-16	80	86	80|92	338	782.5	338|1227	16188	16188	16188|16188	Mammalia	Eulipotyphla	Soricidae	Neomys	Neomys fodiens
38620	23	af25f287-93be-447b-b915-2300605bf0c9	MT892667.1	93.056	92.905	90.11|97.826	6.95e-16	4.11018e-07	1.91e-45|4.15e-06	72	73.1739	40|159	13826	5600.52	239|16610	17265	17265	17265|17265	Mammalia	Didelphimorphia	Didelphidae	Lutreolina	Lutreolina crassicaudata
111428	1	1ce00482-414e-49bc-9e7c-014a152e81f6	MK431828.1	96.491	96.491	96.491|96.491	1.25e-15	1.25e-15	1.25e-15|1.25e-15	57	57	57|57	1652	1652	1652|1652	16890	16890	16890|16890	Mammalia	Eulipotyphla	Talpidae	Mogera	Mogera robusta
42719	13	ac84188b-de8d-4b20-97ec-56b2c984a12f	KJ868124.1	92.105	92.8611	90|100	1.31e-15	1.92808e-07	1.87e-105|2.42e-06	76	149.231	31|370	1731	5635.77	397|15679	15381	15381	15381|15381	Mammalia	Didelphimorphia	Didelphidae	Marmosa	Marmosa demerarae
175813	1	89ebce30-d52e-409c-a270-4bf5ccee1ac4	KJ868165.1	92.754	92.754	92.754|92.754	3.64e-15	3.64e-15	3.64e-15|3.64e-15	69	69	69|69	1242	1242	1242|1242	15360	15360	15360|15360	Mammalia	Diprotodontia	Phalangeridae	Wyulda	Wyulda squamicaudata
126295	14	d6c8b652-0306-497c-82ef-3788108532d0	KJ868123.1	93.651	92.4216	90|95.918	6.55e-15	1.11088e-08	1.81e-110|1.14e-07	63	146.286	41|353	586	4699.5	586|13198	15393	15393	15393|15393	Mammalia	Didelphimorphia	Didelphidae	Marmosa	Marmosa murina
42719	13	3fa40b4d-641a-4619-8b6b-935d38080c32	KJ868124.1	90.909	92.8611	90|100	1.36e-14	1.92808e-07	1.87e-105|2.42e-06	77	149.231	31|370	4593	5635.77	397|15679	15381	15381	15381|15381	Mammalia	Didelphimorphia	Didelphidae	Marmosa	Marmosa demerarae
38620	23	e98f8e59-bd24-490a-a87b-2cc3342b9638	MT892667.1	91.549	92.905	90.11|97.826	3.98e-14	4.11018e-07	1.91e-45|4.15e-06	71	73.1739	40|159	13369	5600.52	239|16610	17265	17265	17265|17265	Mammalia	Didelphimorphia	Didelphidae	Lutreolina	Lutreolina crassicaudata
225728	3	f69494f1-7ac8-4467-ab42-2317b062606f	KT943517.1	91.781	91.5367	91.25|91.781	1.09e-13	3.63333e-14	3.76e-44|1.09e-13	73	109.333	73|160	9405	6319	304|9405	16460	16460	16460|16460	Mammalia	Didelphimorphia	Didelphidae	Tlacuatzin	Tlacuatzin canescens
114229	1	ae443505-a1e1-4f9b-be2b-593185f6bc57	AF108221.1	93.651	93.651	93.651|93.651	1.36e-13	1.36e-13	1.36e-13|1.36e-13	63	63	63|63	11729	11729	11729|11729	1163	1163	1163|1163	Mammalia	Diprotodontia	Phalangeridae	Spilocuscus	Spilocuscus rufoniger
862791	1	20376562-b78e-4c98-bbd5-f4d9852641e6	AP011927.1	94.737	94.737	94.737|94.737	1.66e-13	1.66e-13	1.66e-13|1.66e-13	57	57	57|57	961	961	961|961	16404	16404	16404|16404	Actinopteri	Tetraodontiformes	Tetraodontidae	Torquigener	Torquigener hypselogeneion
38620	23	0acd09e0-784d-4d6e-be29-73a1f8cf9d57	MT892667.1	90.789	92.905	90.11|97.826	2.21e-13	4.11018e-07	1.91e-45|4.15e-06	76	73.1739	40|159	1272	5600.52	239|16610	17265	17265	17265|17265	Mammalia	Didelphimorphia	Didelphidae	Lutreolina	Lutreolina crassicaudata
9606	4	3ce99d47-6fee-4bc8-9e2a-2e3cf3b2ce79	FJ854353.1	94.828	93.4435	91.525|94.828	3.9e-13	1.20603e-08	3.9e-13|3.83e-08	58	57.25	54|59	8649	14135.2	8649|16154	701	701	701|701	Mammalia	Primates	Hominidae	Homo	Homo sapiens
94196	1	a132aeb9-f7c3-44fc-b0b3-c9fe5ee9a49d	KX891745.1	90.541	90.541	90.541|90.541	4.1e-13	4.1e-13	4.1e-13|4.1e-13	74	74	74|74	2349	2349	2349|2349	16586	16586	16586|16586	Mammalia	Carnivora	Viverridae	Viverricula	Viverricula indica
1418811	1	e344e2a8-5348-4111-b56b-7ae74906af31	MF100141.1	93.22	93.22	93.22|93.22	5.06e-13	5.06e-13	5.06e-13|5.06e-13	59	59	59|59	2892	2892	2892|2892	15745	15745	15745|15745	Insecta	Lepidoptera	Endromidae	Mustilizans	Mustilizans hepatica
9606	4	daeb771c-4bd9-4f07-ae10-015ce68af69c	FJ854353.1	94.828	93.4435	91.525|94.828	7.12e-13	1.20603e-08	3.9e-13|3.83e-08	58	57.25	54|59	15767	14135.2	8649|16154	701	701	701|701	Mammalia	Primates	Hominidae	Homo	Homo sapiens
38620	23	7b5fe5d2-d824-48b7-a50a-10674c30fc34	MT892667.1	92.424	92.905	90.11|97.826	7.58e-13	4.11018e-07	1.91e-45|4.15e-06	66	73.1739	40|159	1124	5600.52	239|16610	17265	17265	17265|17265	Mammalia	Didelphimorphia	Didelphidae	Lutreolina	Lutreolina crassicaudata
126295	14	4346dff2-b56d-4b31-a050-79cc533f6371	KJ868123.1	90.789	92.4216	90|95.918	1.84e-12	1.11088e-08	1.81e-110|1.14e-07	76	146.286	41|353	2694	4699.5	586|13198	15393	15393	15393|15393	Mammalia	Didelphimorphia	Didelphidae	Marmosa	Marmosa murina
9316	1	3987b41e-f1db-4d7b-a8d7-be24e4baf9b4	MH717106.1	90.541	90.541	90.541|90.541	4.52e-12	4.52e-12	4.52e-12|4.52e-12	74	74	74|74	1708	1708	1708|1708	16881	16881	16881|16881	Mammalia	Diprotodontia	Macropodidae	Macropus	Macropus fuliginosus
38620	23	d8e0b1c0-a506-435c-95c0-597e236a7113	MT892667.1	97.826	92.905	90.11|97.826	6.65e-12	4.11018e-07	1.91e-45|4.15e-06	46	73.1739	40|159	9710	5600.52	239|16610	17265	17265	17265|17265	Mammalia	Didelphimorphia	Didelphidae	Lutreolina	Lutreolina crassicaudata
69259	2	9fa3ac7d-5308-4a4f-a846-a87500539020	KJ868102.1	94.643	94.3215	94|94.643	1.39e-11	2.08695e-09	1.39e-11|4.16e-09	56	53	50|56	5231	3490.5	1750|5231	16850	16850	16850|16850	Mammalia	Diprotodontia	Potoroidae	Bettongia	Bettongia penicillata
38616	1	9e08a55e-a29b-43f1-8392-b6f481d00f45	AB241054.1	94.444	94.444	94.444|94.444	3.26e-11	3.26e-11	3.26e-11|3.26e-11	54	54	54|54	3145	3145	3145|3145	16058	16058	16058|16058	Mammalia	Diprotodontia	Petauridae	Dactylopsila	Dactylopsila trivirgata
126295	14	8d7ec21a-296d-4ec1-9996-c22e35c6bcb8	KJ868123.1	95.918	92.4216	90|95.918	1.22e-10	1.11088e-08	1.81e-110|1.14e-07	49	146.286	41|353	11745	4699.5	586|13198	15393	15393	15393|15393	Mammalia	Didelphimorphia	Didelphidae	Marmosa	Marmosa murina
38620	23	22d8ce17-be8a-4063-8816-201aa573dfd3	MT892667.1	95.745	92.905	90.11|97.826	9.19e-10	4.11018e-07	1.91e-45|4.15e-06	47	73.1739	40|159	5825	5600.52	239|16610	17265	17265	17265|17265	Mammalia	Didelphimorphia	Didelphidae	Lutreolina	Lutreolina crassicaudata
92651	1	1de88d24-aa0f-442d-a214-b951dcdd7de0	AJ639871.1	92.982	92.982	92.982|92.982	1.26e-09	1.26e-09	1.26e-09|1.26e-09	57	57	57|57	2059	2059	2059|2059	15289	15289	15289|15289	Mammalia	Peramelemorphia	Peramelidae	Macrotis	Macrotis lagotis
391189	1	b3e0f7e6-2885-4c17-8727-d53ec2080aff	AP010862.1	92.593	92.593	92.593|92.593	1.83e-09	1.83e-09	1.83e-09|1.83e-09	54	54	54|54	782	782	782|782	17859	17859	17859|17859	Actinopteri	Anguilliformes	Ophichthidae	Myrichthys	Myrichthys maculosus
38620	23	6fb1dfbd-b390-4651-83da-223bddde8055	MT892667.1	91.525	92.905	90.11|97.826	2.34e-09	4.11018e-07	1.91e-45|4.15e-06	59	73.1739	40|159	14801	5600.52	239|16610	17265	17265	17265|17265	Mammalia	Didelphimorphia	Didelphidae	Lutreolina	Lutreolina crassicaudata
190504	1	6e5d1623-f03f-4181-ad7b-9a4b0bed05fc	JX312693.1	92.593	92.593	92.593|92.593	2.66e-09	2.66e-09	2.66e-09|2.66e-09	54	54	54|54	1127	1127	1127|1127	16571	16571	16571|16571	Mammalia	Rodentia	Erethizontidae	Coendou	Coendou insidiosus
69259	2	e83552aa-6a6a-41cd-b3bc-53d0ae325eed	KJ868102.1	94	94.3215	94|94.643	4.16e-09	2.08695e-09	1.39e-11|4.16e-09	50	53	50|56	1750	3490.5	1750|5231	16850	16850	16850|16850	Mammalia	Diprotodontia	Potoroidae	Bettongia	Bettongia penicillata
38620	23	84e59af0-73fe-4bef-8d75-f9dc75ffaf4b	MT892667.1	97.5	92.905	90.11|97.826	5.14e-09	4.11018e-07	1.91e-45|4.15e-06	40	73.1739	40|159	2162	5600.52	239|16610	17265	17265	17265|17265	Mammalia	Didelphimorphia	Didelphidae	Lutreolina	Lutreolina crassicaudata
164528	3	f0ed1b50-0a05-484d-a23c-6669cecb14f9	AY795975.1	94.231	92.6677	91.111|94.231	5.52e-09	1.84e-09	6.28e-29|5.52e-09	52	83.6667	52|109	8975	7893.33	2376|12329	16642	16642	16642|16642	Mammalia	Peramelemorphia	Peroryctidae	Echymipera	Echymipera rufescens
9606	4	2aab30ba-8d90-4ec5-9e13-83ee64d55592	FJ854353.1	91.525	93.4435	91.525|94.828	9.94e-09	1.20603e-08	3.9e-13|3.83e-08	59	57.25	54|59	16154	14135.2	8649|16154	701	701	701|701	Mammalia	Primates	Hominidae	Homo	Homo sapiens
9267	1	fd4b0b9f-1ee5-4e5d-bdda-87b059a5faf6	Z29573.1	94.118	94.118	94.118|94.118	1.03e-08	1.03e-08	1.03e-08|1.03e-08	51	51	51|51	4308	4308	4308|4308	17084	17084	17084|17084	Mammalia	Didelphimorphia	Didelphidae	Didelphis	Didelphis virginiana
2030326	1	ce73c523-d3bf-4eab-8629-82e86623cf7a	MF410970.1	93.75	93.75	93.75|93.75	2.44e-08	2.44e-08	2.44e-08|2.44e-08	48	48	48|48	10165	10165	10165|10165	17505	17505	17505|17505	Insecta	Diptera	NA	NA	Diptera sp. 4 LC-2017
42719	13	6f9bb321-401d-4aba-a46f-0d94fee1d253	KJ868124.1	97.5	92.8611	90|100	3.11e-08	1.92808e-07	1.87e-105|2.42e-06	40	149.231	31|370	3344	5635.77	397|15679	15381	15381	15381|15381	Mammalia	Didelphimorphia	Didelphidae	Marmosa	Marmosa demerarae
2868981	1	7425ab71-d819-4573-8df4-2c7d6a085a75	MZ265345.1	92.157	92.157	92.157|92.157	3.62e-08	3.62e-08	3.62e-08|3.62e-08	51	51	51|51	3889	3889	3889|3889	15289	15289	15289|15289	Insecta	Hymenoptera	Tenthredinidae	Megatomostethus	Megatomostethus crassicornis
9606	4	271a64c2-af05-4051-82fa-fab8990dd9ba	FJ854353.1	92.593	93.4435	91.525|94.828	3.83e-08	1.20603e-08	3.9e-13|3.83e-08	54	57.25	54|59	15971	14135.2	8649|16154	701	701	701|701	Mammalia	Primates	Hominidae	Homo	Homo sapiens
126295	14	90b60acb-aba7-4acb-ad31-002e8b6dc762	KJ868123.1	92.727	92.4216	90|95.918	4.14e-08	1.11088e-08	1.81e-110|1.14e-07	55	146.286	41|353	4442	4699.5	586|13198	15393	15393	15393|15393	Mammalia	Didelphimorphia	Didelphidae	Marmosa	Marmosa murina
42719	13	0ef01ac9-73ca-4d5e-8ed6-054cd12012a2	KJ868124.1	95.238	92.8611	90|100	5.54e-08	1.92808e-07	1.87e-105|2.42e-06	42	149.231	31|370	5937	5635.77	397|15679	15381	15381	15381|15381	Mammalia	Didelphimorphia	Didelphidae	Marmosa	Marmosa demerarae
126295	14	24e75c8c-8f47-43b6-81c9-ab3866b0eb47	KJ868123.1	95.122	92.4216	90|95.918	1.14e-07	1.11088e-08	1.81e-110|1.14e-07	41	146.286	41|353	3151	4699.5	586|13198	15393	15393	15393|15393	Mammalia	Didelphimorphia	Didelphidae	Marmosa	Marmosa murina
1426860	1	51308cf9-bdd7-4bed-bf75-8c2606d28b49	MZ927092.1	94	94	94|94	1.37e-07	1.37e-07	1.37e-07|1.37e-07	50	50	50|50	14703	14703	14703|14703	15503	15503	15503|15503	Insecta	Lepidoptera	Erebidae	Amerila	Amerila alberti
38620	23	bfd8ff87-c677-4f20-abdd-a3860f0b0c3e	MT892667.1	92.453	92.905	90.11|97.826	2.21e-07	4.11018e-07	1.91e-45|4.15e-06	53	73.1739	40|159	1572	5600.52	239|16610	17265	17265	17265|17265	Mammalia	Didelphimorphia	Didelphidae	Lutreolina	Lutreolina crassicaudata
38620	23	ba9ac760-d7f4-4a21-9240-758833479447	MT892667.1	95.455	92.905	90.11|97.826	2.63e-07	4.11018e-07	1.91e-45|4.15e-06	44	73.1739	40|159	7236	5600.52	239|16610	17265	17265	17265|17265	Mammalia	Didelphimorphia	Didelphidae	Lutreolina	Lutreolina crassicaudata
38620	23	c8225c19-8dcf-43e9-bb13-009cf1045aaa	MT892667.1	90.476	92.905	90.11|97.826	4.31e-07	4.11018e-07	1.91e-45|4.15e-06	63	73.1739	40|159	3057	5600.52	239|16610	17265	17265	17265|17265	Mammalia	Didelphimorphia	Didelphidae	Lutreolina	Lutreolina crassicaudata
38620	23	e2148d67-635b-4cf4-a63f-32450ffb3c57	MT892667.1	90.909	92.905	90.11|97.826	1.23e-06	4.11018e-07	1.91e-45|4.15e-06	55	73.1739	40|159	2236	5600.52	239|16610	17265	17265	17265|17265	Mammalia	Didelphimorphia	Didelphidae	Lutreolina	Lutreolina crassicaudata
42719	13	d10b2d51-5c4a-4e5b-a597-260eb5c0e866	KJ868124.1	100	92.8611	90|100	2.42e-06	1.92808e-07	1.87e-105|2.42e-06	31	149.231	31|370	1142	5635.77	397|15679	15381	15381	15381|15381	Mammalia	Didelphimorphia	Didelphidae	Marmosa	Marmosa demerarae
38620	23	21b7727c-3674-4a85-8549-41d5494f8ade	MT892667.1	95.238	92.905	90.11|97.826	3.15e-06	4.11018e-07	1.91e-45|4.15e-06	42	73.1739	40|159	5716	5600.52	239|16610	17265	17265	17265|17265	Mammalia	Didelphimorphia	Didelphidae	Lutreolina	Lutreolina crassicaudata
2939475	1	fd9bd6a9-ee9e-406b-bcf8-47ec5e8f937d	ON323501.1	93.333	93.333	93.333|93.333	3.35e-06	3.35e-06	3.35e-06|3.35e-06	45	45	45|45	6072	6072	6072|6072	15234	15234	15234|15234	Insecta	Lepidoptera	Lecithoceridae	Issikiopteryx	Issikiopteryx taipingensis
38620	23	6fef19d1-11f1-4f1f-9b49-42f5ff7c662c	MT892667.1	95.122	92.905	90.11|97.826	4.15e-06	4.11018e-07	1.91e-45|4.15e-06	41	73.1739	40|159	7513	5600.52	239|16610	17265	17265	17265|17265	Mammalia	Didelphimorphia	Didelphidae	Lutreolina	Lutreolina crassicaudata
JFD1646
subject.tax.id	Count	query.acc.ver	subject.acc.ver	X..identity	Average.X..identity	X..identity.range	evalue	Average.evalue	evalue.range	alignment.length	Average.alignment.length	alignment.length.range	query.length	Average.query.length	query.length.range	subject.length	Average.subject.length	subject.length.range	class	order	family	genus	species
1734923	7	23c4b03f-d6cc-4d04-8cfc-39267b9616f2	KP778515.1	92.284	92.1144	90.354|94.656	5.77e-118	8.54286e-49	5.77e-118|5.98e-48	324	290.429	131|334	1165	870.286	635|1165	613	613	613|613	Mammalia	Rodentia	Cricetidae	Handleyomys	Handleyomys rhabdops
1734923	7	0d231514-8afd-454f-af2f-e4e872c9d2d3	KP778515.1	91.867	92.1144	90.354|94.656	1.87e-116	8.54286e-49	5.77e-118|5.98e-48	332	290.429	131|334	649	870.286	635|1165	613	613	613|613	Mammalia	Rodentia	Cricetidae	Handleyomys	Handleyomys rhabdops
1734923	7	60839e3e-3343-47cc-ba92-ac8ed2ac2c1d	KP778515.1	91.617	92.1144	90.354|94.656	1.12e-112	8.54286e-49	5.77e-118|5.98e-48	334	290.429	131|334	1096	870.286	635|1165	613	613	613|613	Mammalia	Rodentia	Cricetidae	Handleyomys	Handleyomys rhabdops
1734923	7	c0c02cc2-6cf9-4487-ab1c-1c7fbe2170a7	KP778515.1	92.131	92.1144	90.354|94.656	2.74e-109	8.54286e-49	5.77e-118|5.98e-48	305	290.429	131|334	771	870.286	635|1165	613	613	613|613	Mammalia	Rodentia	Cricetidae	Handleyomys	Handleyomys rhabdops
1734923	7	4880a9e9-7f90-4d57-9e7e-920f449f7617	KP778515.1	91.892	92.1144	90.354|94.656	1.8e-104	8.54286e-49	5.77e-118|5.98e-48	296	290.429	131|334	948	870.286	635|1165	613	613	613|613	Mammalia	Rodentia	Cricetidae	Handleyomys	Handleyomys rhabdops
1734923	7	830d23cd-5c81-47b1-9b6b-848ef7a307b6	KP778515.1	90.354	92.1144	90.354|94.656	1.91e-97	8.54286e-49	5.77e-118|5.98e-48	311	290.429	131|334	828	870.286	635|1165	613	613	613|613	Mammalia	Rodentia	Cricetidae	Handleyomys	Handleyomys rhabdops
56323	1	cfde687d-8891-4e04-a50f-6f7e7cb18ee4	ON528118.1	90.476	90.476	90.476|90.476	1.57e-65	1.57e-65	1.57e-65|1.57e-65	210	210	210|210	238	238	238|238	16441	16441	16441|16441	Mammalia	Rodentia	Cricetidae	Podomys	Podomys floridanus
1734923	7	5e708ef9-33d7-4068-8fd4-264a5c106113	KP778495.1	94.656	92.1144	90.354|94.656	5.98e-48	8.54286e-49	5.77e-118|5.98e-48	131	290.429	131|334	635	870.286	635|1165	613	613	613|613	Mammalia	Rodentia	Cricetidae	Handleyomys	Handleyomys rhabdops
29095	1	b9756881-9e85-4359-8e02-520bb01045be	GU938911.1	91.018	91.018	91.018|91.018	3.31e-44	3.31e-44	3.31e-44|3.31e-44	167	167	167|167	3806	3806	3806|3806	664	664	664|664	Mammalia	Rodentia	Cricetidae	Akodon	Akodon azarae
530171	1	e607d0a3-eefd-4540-80ff-d57da62ce51d	KP778471.1	94.69	94.69	94.69|94.69	4.16e-39	4.16e-39	4.16e-39|4.16e-39	113	113	113|113	2317	2317	2317|2317	611	611	611|611	Mammalia	Rodentia	Cricetidae	Handleyomys	Handleyomys alfaroi
89098	1	40c75681-0d57-43b6-a30b-689c783258ac	OL685394.1	90.58	90.58	90.58|90.58	5.4e-36	5.4e-36	5.4e-36|5.4e-36	138	138	138|138	3340	3340	3340|3340	16358	16358	16358|16358	Mammalia	Rodentia	Cricetidae	Holochilus	Holochilus sciureus
218793	2	25c56045-9b8c-4e5e-9e49-e71d48074fca	MH939287.1	93.519	93.056	92.593|93.519	1.38e-31	2.72e-08	1.38e-31|5.44e-08	108	81	54|108	1621	3728	1621|5835	16309	16309	16309|16309	Mammalia	Rodentia	Cricetidae	Melanomys	Melanomys caliginosus
2820807	1	90a6032d-7eb1-47ff-bb74-8c2819408f53	MW401673.1	91.071	91.071	91.071|91.071	1.82e-26	1.82e-26	1.82e-26|1.82e-26	112	112	112|112	282	282	282|282	16341	16341	16341|16341	Mammalia	Rodentia	Cricetidae	Dicrostonyx	Dicrostonyx torquatus
10105	1	4ccb4073-efb5-4ab5-a7d9-e7ebe431fd51	OP764673.1	95.062	95.062	95.062|95.062	1.49e-24	1.49e-24	1.49e-24|1.49e-24	81	81	81|81	383	383	383|383	16303	16303	16303|16303	Mammalia	Rodentia	Muridae	Mus	Mus minutoides
225399	1	6bc8600d-7cd8-4763-8b26-100b4a373d18	AB106567.1	93.182	93.182	93.182|93.182	2.68e-22	2.68e-22	2.68e-22|2.68e-22	88	88	88|88	1122	1122	1122|1122	957	957	957|957	Mammalia	Chiroptera	Vespertilionidae	Myotis	Myotis chinensis
907928	1	c4f54603-b16f-4013-84aa-540796a54651	KY117562.1	92.771	92.771	92.771|92.771	1.36e-21	1.36e-21	1.36e-21|1.36e-21	83	83	83|83	1450	1450	1450|1450	16296	16296	16296|16296	Mammalia	Rodentia	Muridae	Maxomys	Maxomys rajah
530173	1	cb43bd0f-a305-41a4-86aa-b960afde13fd	KP778468.1	91.011	91.011	91.011|91.011	3.1e-18	3.1e-18	3.1e-18|3.1e-18	89	89	89|89	3659	3659	3659|3659	614	614	614|614	Mammalia	Rodentia	Cricetidae	Handleyomys	Handleyomys saturatior
145637	1	4b5045fc-bfa3-44b2-84fe-1b8c7be78b46	OQ161206.1	95.238	95.238	95.238|95.238	5.72e-18	5.72e-18	5.72e-18|5.72e-18	63	63	63|63	1744	1744	1744|1744	16846	16846	16846|16846	Gastropoda	Littorinimorpha	Tateidae	Potamopyrgus	Potamopyrgus antipodarum
121561	1	3b5548ed-5923-41a2-b3c0-54dc461aeb81	MN807612.1	90	90	90|90	2.3e-17	2.3e-17	2.3e-17|2.3e-17	100	100	100|100	6966	6966	6966|6966	16259	16259	16259|16259	Mammalia	Rodentia	Muridae	Aethomys	Aethomys chrysophilus
1936103	1	ed96188d-31e7-4a0e-b22c-3649c36988a0	KY464175.1	90.476	90.476	90.476|90.476	2.4e-15	2.4e-15	2.4e-15|2.4e-15	84	84	84|84	12270	12270	12270|12270	16295	16295	16295|16295	Mammalia	Rodentia	Muridae	Sundamys	Sundamys infraluteus
209873	1	b30b78c5-29a0-46e8-88bf-9adc27c963ef	MZ131570.1	90.667	90.667	90.667|90.667	6.19e-13	6.19e-13	6.19e-13|6.19e-13	75	75	75|75	13702	13702	13702|13702	16245	16245	16245|16245	Mammalia	Rodentia	Muridae	Zelotomys	Zelotomys hildegardeae
80807	1	44748502-1fc4-42da-874e-c09719cda473	JQ714034.1	92.063	92.063	92.063|92.063	1.6e-11	1.6e-11	1.6e-11|1.6e-11	63	63	63|63	1555	1555	1555|1555	16566	16566	16566|16566	Actinopteri	Cypriniformes	Acheilognathidae	Acheilognathus	Acheilognathus signifer
2776654	1	14668b24-9525-48ff-8bb0-b7e0b02c50a4	MT408169.1	97.727	97.727	97.727|97.727	4.5e-10	4.5e-10	4.5e-10|4.5e-10	44	44	44|44	11094	11094	11094|11094	16245	16245	16245|16245	Mammalia	Rodentia	Muridae	Stenocephalemys	Stenocephalemys ruppi
1126389	1	9c339e89-f514-4424-83d6-9c6e9134934e	OU342870.1	90	90	90|90	9.09e-09	9.09e-09	9.09e-09|9.09e-09	60	60	60|60	14767	14767	14767|14767	27053	27053	27053|27053	Insecta	Hymenoptera	Crabronidae	Ectemnius	Ectemnius continuus
2915463	1	200ea135-da64-4f02-b020-d5ca06f065c1	OM460714.1	95.349	95.349	95.349|95.349	1.05e-08	1.05e-08	1.05e-08|1.05e-08	43	43	43|43	1142	1142	1142|1142	15245	15245	15245|15245	Insecta	Lepidoptera	Nymphalidae	Junonia	Junonia adulatrix
1515608	1	79b66efa-53b1-400d-911d-a0de2dc0f479	ON165293.1	90	90	90|90	1.68e-08	1.68e-08	1.68e-08|1.68e-08	70	70	70|70	1812	1812	1812|1812	16277	16277	16277|16277	Mammalia	Rodentia	Cricetidae	Cricetulus	Cricetulus kamensis
218793	2	a3442d2c-f744-4849-bc47-e1d68a15419f	MH939287.1	92.593	93.056	92.593|93.519	5.44e-08	2.72e-08	1.38e-31|5.44e-08	54	81	54|108	5835	3728	1621|5835	16309	16309	16309|16309	Mammalia	Rodentia	Cricetidae	Melanomys	Melanomys caliginosus
3026534	1	1dc485c6-2e00-40e6-9976-b481b299c3cd	OP574194.1	97.297	97.297	97.297|97.297	8.86e-08	8.86e-08	8.86e-08|8.86e-08	37	37	37|37	645	645	645|645	16903	16903	16903|16903	Insecta	Hymenoptera	Diprionidae	Diprion	Diprion sp.
570426	1	0094aea2-01f6-4e6a-9842-c037cc9a654b	MW574352.1	90.909	90.909	90.909|90.909	1.41e-07	1.41e-07	1.41e-07|1.41e-07	55	55	55|55	1011	1011	1011|1011	16753	16753	16753|16753	Aves	Galliformes	Numididae	Agelastes	Agelastes niger
1309530	1	eb7ec88c-cba8-45c5-8e0e-19802a65cda7	MT872679.1	97.436	97.436	97.436|97.436	4.25e-07	4.25e-07	4.25e-07|4.25e-07	39	39	39|39	11692	11692	11692|11692	20117	20117	20117|20117	Insecta	Coleoptera	Dytiscidae	Oreodytes	Oreodytes sanmarkii
987918	1	00194b6f-95bb-46d8-8cd3-b7edd45de6f7	OX276419.1	93.182	93.182	93.182|93.182	8.01e-07	8.01e-07	8.01e-07|8.01e-07	44	44	44|44	1467	1467	1467|1467	15385	15385	15385|15385	Insecta	Lepidoptera	Erebidae	Cybosia	Cybosia mesomella
1085627	1	a1aceff1-6b10-4872-8457-be38a200822f	JN100019.1	100	100	100|100	1.99e-06	1.99e-06	1.99e-06|1.99e-06	32	32	32|32	3610	3610	3610|3610	15384	15384	15384|15384	Insecta	Hemiptera	Enicocephalidae	Stenopirates	Stenopirates sp. HL-2011
13151	1	f3f4adda-fad0-465d-811c-03c22ba9b32e	MT410898.1	91.837	91.837	91.837|91.837	3.02e-06	3.02e-06	3.02e-06|3.02e-06	49	49	49|49	1421	1421	1421|1421	16241	16241	16241|16241	Mammalia	Rodentia	Muridae	Micromys	Micromys minutus
2599921	1	f5498e0a-697e-4572-a1e5-16a18f1479fc	OL998464.1	93.182	93.182	93.182|93.182	9.39e-06	9.39e-06	9.39e-06|9.39e-06	44	44	44|44	16982	16982	16982|16982	16363	16363	16363|16363	Insecta	Coleoptera	Lampyridae	Abscondita	Abscondita chinensis

## Sheet: Order-level Rodentia
DC-BLAST results for rodents (Rodentia) order-level analyses.
JFD1615
subject.tax.id	Count	query.acc.ver	subject.acc.ver	X..identity	Average.X..identity	X..identity.range	evalue	Average.evalue	evalue.range	alignment.length	Average.alignment.length	alignment.length.range	query.length	Average.query.length	query.length.range	subject.length	Average.subject.length	subject.length.range	class	order	family	genus	species
530178	6	3ee73814-a47a-473e-884b-b5d83ff1d1f9	MZ364418.1	96.39	94.2007	91.501|96.39	0	1.27333e-13	0|7.64e-13	554	387.5	48|655	773	3075.5	773|11313	658	712.167	384|1325	Mammalia	Rodentia	Cricetidae	Nephelomys	Nephelomys albigularis
1734924	21	f72885e0-ad3c-482c-bf11-f4b1e1dcfa20	MN547688.1	95.152	92.845	90.126|95.152	0	2.79048e-77	0|5.86e-76	1155	687.238	216|1167	6928	3471.38	387|16151	1149	830.714	592|1149	Mammalia	Rodentia	Cricetidae	Nephelomys	Nephelomys devius
1734924	21	924db275-3e96-4408-98f9-154af20af670	MN547688.1	95.142	92.845	90.126|95.152	0	2.79048e-77	0|5.86e-76	988	687.238	216|1167	4287	3471.38	387|16151	1149	830.714	592|1149	Mammalia	Rodentia	Cricetidae	Nephelomys	Nephelomys devius
1734924	21	e00ce4c9-2a53-4059-be4d-4d66f2882655	MN547688.1	94.212	92.845	90.126|95.152	0	2.79048e-77	0|5.86e-76	812	687.238	216|1167	7151	3471.38	387|16151	1149	830.714	592|1149	Mammalia	Rodentia	Cricetidae	Nephelomys	Nephelomys devius
1734924	21	f6bf4db3-57c8-4b1d-9eda-8a5141c62382	MN547688.1	94.041	92.845	90.126|95.152	0	2.79048e-77	0|5.86e-76	537	687.238	216|1167	3461	3471.38	387|16151	1149	830.714	592|1149	Mammalia	Rodentia	Cricetidae	Nephelomys	Nephelomys devius
1734924	21	84ef6bba-2d2e-4c03-bb96-f952924466c3	MN547688.1	93.809	92.845	90.126|95.152	0	2.79048e-77	0|5.86e-76	1163	687.238	216|1167	16151	3471.38	387|16151	1149	830.714	592|1149	Mammalia	Rodentia	Cricetidae	Nephelomys	Nephelomys devius
1734924	21	24767208-0c7d-4884-bbc7-e7c8fb5147dd	MN547688.1	93.46	92.845	90.126|95.152	0	2.79048e-77	0|5.86e-76	1162	687.238	216|1167	3946	3471.38	387|16151	1149	830.714	592|1149	Mammalia	Rodentia	Cricetidae	Nephelomys	Nephelomys devius
2964401	1	63fb5581-6bd8-4453-a682-24fd21bc755d	MZ364464.1	93.455	93.455	93.455|93.455	0	0	0|0	550	550	550|550	2892	2892	2892|2892	544	544	544|544	Mammalia	Rodentia	Cricetidae	Nephelomys	Nephelomys childi
1734924	21	511eed02-7f29-4032-b3c7-50015f495861	MN547700.1	93.402	92.845	90.126|95.152	0	2.79048e-77	0|5.86e-76	1167	687.238	216|1167	13987	3471.38	387|16151	1149	830.714	592|1149	Mammalia	Rodentia	Cricetidae	Nephelomys	Nephelomys devius
530178	6	47ed31de-20db-4117-bbfd-ce36d1e1e15b	MZ364418.1	92.977	94.2007	91.501|96.39	0	1.27333e-13	0|7.64e-13	655	387.5	48|655	2527	3075.5	773|11313	658	712.167	384|1325	Mammalia	Rodentia	Cricetidae	Nephelomys	Nephelomys albigularis
1734924	21	865ab8f7-e911-4e21-be61-8cc5a43818a7	KP778620.1	92.842	92.845	90.126|95.152	0	2.79048e-77	0|5.86e-76	475	687.238	216|1167	1104	3471.38	387|16151	592	830.714	592|1149	Mammalia	Rodentia	Cricetidae	Nephelomys	Nephelomys devius
1734924	21	5fb1558b-0ffc-47d6-9a5d-8422a65217d1	MN547688.1	92.564	92.845	90.126|95.152	0	2.79048e-77	0|5.86e-76	659	687.238	216|1167	685	3471.38	387|16151	1149	830.714	592|1149	Mammalia	Rodentia	Cricetidae	Nephelomys	Nephelomys devius
1734924	21	0af9f6ac-bbc9-4dd5-9b53-47c2e4b0dbd8	KP778620.1	92.549	92.845	90.126|95.152	0	2.79048e-77	0|5.86e-76	510	687.238	216|1167	1138	3471.38	387|16151	592	830.714	592|1149	Mammalia	Rodentia	Cricetidae	Nephelomys	Nephelomys devius
1734924	21	5ce073ec-8d8b-4cfa-811a-5bb2cb9d2c03	KP778620.1	92.545	92.845	90.126|95.152	0	2.79048e-77	0|5.86e-76	550	687.238	216|1167	1194	3471.38	387|16151	592	830.714	592|1149	Mammalia	Rodentia	Cricetidae	Nephelomys	Nephelomys devius
1734924	21	688aaddb-8e1e-41c5-992c-78d6a13fb6ad	KP778620.1	92.224	92.845	90.126|95.152	0	2.79048e-77	0|5.86e-76	553	687.238	216|1167	1063	3471.38	387|16151	592	830.714	592|1149	Mammalia	Rodentia	Cricetidae	Nephelomys	Nephelomys devius
1734924	21	06217830-5a99-4ce4-8950-96ed901e7c76	KP778654.1	92.157	92.845	90.126|95.152	0	2.79048e-77	0|5.86e-76	510	687.238	216|1167	1046	3471.38	387|16151	592	830.714	592|1149	Mammalia	Rodentia	Cricetidae	Nephelomys	Nephelomys devius
1734924	21	3e57e243-6dc3-4a5d-baf9-be3331de440d	KP778620.1	92.058	92.845	90.126|95.152	0	2.79048e-77	0|5.86e-76	554	687.238	216|1167	1221	3471.38	387|16151	592	830.714	592|1149	Mammalia	Rodentia	Cricetidae	Nephelomys	Nephelomys devius
1734924	21	9d8159c9-c6d3-403b-ac29-fd8512894561	MN547688.1	91.701	92.845	90.126|95.152	0	2.79048e-77	0|5.86e-76	976	687.238	216|1167	4225	3471.38	387|16151	1149	830.714	592|1149	Mammalia	Rodentia	Cricetidae	Nephelomys	Nephelomys devius
1734924	21	9b2d595a-c9b8-4d6f-83be-817e49f30596	KP778620.1	90.96	92.845	90.126|95.152	0	2.79048e-77	0|5.86e-76	531	687.238	216|1167	927	3471.38	387|16151	592	830.714	592|1149	Mammalia	Rodentia	Cricetidae	Nephelomys	Nephelomys devius
1734924	21	44f53a99-a41d-4bc2-9a5b-a5cdc44661c3	KP778620.1	90.126	92.845	90.126|95.152	5.11e-180	2.79048e-77	0|5.86e-76	557	687.238	216|1167	1142	3471.38	387|16151	592	830.714	592|1149	Mammalia	Rodentia	Cricetidae	Nephelomys	Nephelomys devius
1734924	21	dbdb1cb4-8c65-4ea6-b307-83e5a9c7b20a	KP778654.1	94.377	92.845	90.126|95.152	2e-172	2.79048e-77	0|5.86e-76	409	687.238	216|1167	940	3471.38	387|16151	592	830.714	592|1149	Mammalia	Rodentia	Cricetidae	Nephelomys	Nephelomys devius
1734924	21	dfa32d51-c20e-442a-be47-b2aead04572a	KP778620.1	90.149	92.845	90.126|95.152	2.24e-172	2.79048e-77	0|5.86e-76	538	687.238	216|1167	1054	3471.38	387|16151	592	830.714	592|1149	Mammalia	Rodentia	Cricetidae	Nephelomys	Nephelomys devius
1734924	21	152c7bd8-52d9-4aef-8889-1b0dc0d28554	KP778481.1	94.146	92.845	90.126|95.152	7.12e-172	2.79048e-77	0|5.86e-76	410	687.238	216|1167	862	3471.38	387|16151	592	830.714	592|1149	Mammalia	Rodentia	Cricetidae	Nephelomys	Nephelomys devius
530178	6	33cf6bd1-ec64-4508-9278-4c7fb5a8719e	JF693848.1	92.784	94.2007	91.501|96.39	1.15e-150	1.27333e-13	0|7.64e-13	388	387.5	48|655	11313	3075.5	773|11313	384	712.167	384|1325	Mammalia	Rodentia	Cricetidae	Nephelomys	Nephelomys albigularis
530178	6	e75cc1ad-cccf-4d7e-8904-71416b7c5baa	MZ364418.1	95.719	94.2007	91.501|96.39	8.66e-147	1.27333e-13	0|7.64e-13	327	387.5	48|655	1618	3075.5	773|11313	658	712.167	384|1325	Mammalia	Rodentia	Cricetidae	Nephelomys	Nephelomys albigularis
2904038	1	e1c7ab94-7b80-4374-96b1-ad15d03f4a01	MZ736555.1	91.033	91.033	91.033|91.033	2.02e-117	0	2.02e-117|2.02e-117	368	368	368|368	16670	16670	16670|16670	801	801	801|801	Mammalia	Rodentia	Cricetidae	Nephelomys	Nephelomys ricardopalmai
530178	6	cff063ec-3ae2-4f2d-9c82-bded2f55de75	U83820.1	91.501	94.2007	91.501|96.39	1.48e-111	1.27333e-13	0|7.64e-13	353	387.5	48|655	1017	3075.5	773|11313	1325	712.167	384|1325	Mammalia	Rodentia	Cricetidae	Nephelomys	Nephelomys albigularis
530172	1	75b4cc56-9a7c-4f62-8abf-b6d6140e73a6	KP778473.1	91.9	91.9	91.9|91.9	2.43e-107	0	2.43e-107|2.43e-107	321	321	321|321	1221	1221	1221|1221	610	610	610|610	Mammalia	Rodentia	Cricetidae	Handleyomys	Handleyomys rostratus
1734924	21	c84c5c96-7916-4521-a243-2cd4ef98c2e6	KP778481.1	92.13	92.845	90.126|95.152	5.86e-76	2.79048e-77	0|5.86e-76	216	687.238	216|1167	387	3471.38	387|16151	592	830.714	592|1149	Mammalia	Rodentia	Cricetidae	Nephelomys	Nephelomys devius
530184	1	881b3b01-48f3-46f2-9fe7-c33c3910d144	MZ364477.1	98.113	98.113	98.113|98.113	8.65e-47	8.65e-47	8.65e-47|8.65e-47	106	106	106|106	641	641	641|641	546	546	546|546	Mammalia	Rodentia	Cricetidae	Transandinomys	Transandinomys talamancae
89098	3	02af005a-5838-4eeb-b710-334f8a509540	OL685394.1	91.304	91.916	90|94.444	5.05e-40	3.83334e-09	5.05e-40|1.15e-08	138	84	54|138	316	834.667	316|1325	16358	16358	16358|16358	Mammalia	Rodentia	Cricetidae	Holochilus	Holochilus sciureus
322708	1	fea2d9d7-7550-4bd0-aa8e-0e4073e4aa6f	DQ138954.1	93.162	93.162	93.162|93.162	2.42e-36	2.42e-36	2.42e-36|2.42e-36	117	117	117|117	426	426	426|426	1494	1494	1494|1494	Mammalia	Rodentia	Cricetidae	Peromyscus	Peromyscus perfulvus
685891	1	cb10d364-8d87-41a8-a5c6-9c8fdfbf4329	MT492448.1	91.129	91.129	91.129|91.129	6.68e-31	6.68e-31	6.68e-31|6.68e-31	124	124	124|124	8266	8266	8266|8266	16354	16354	16354|16354	Mammalia	Rodentia	Cricetidae	Eolagurus	Eolagurus luteus
105199	1	47c9f2ab-7ba0-4a0a-b48d-75a8d14878e8	NC_033356.1	94.048	94.048	94.048|94.048	5.19e-26	5.19e-26	5.19e-26|5.19e-26	84	84	84|84	814	814	814|814	16294	16294	16294|16294	Mammalia	Rodentia	Cricetidae	Neotoma	Neotoma fuscipes
870527	1	bc10a46d-8a5e-49ec-a136-b32264d07505	ON165359.1	96.667	96.667	96.667|96.667	3.56e-21	3.56e-21	3.56e-21|3.56e-21	60	60	60|60	282	282	282|282	15902	15902	15902|15902	Mammalia	Rodentia	Cricetidae	Eothenomys	Eothenomys eva
89150	1	9a94a1da-c789-42bc-bdac-7243ba910978	KY707307.1	92.683	92.683	92.683|92.683	3.69e-21	3.69e-21	3.69e-21|3.69e-21	82	82	82|82	1082	1082	1082|1082	16606	16606	16606|16606	Mammalia	Rodentia	Cricetidae	Reithrodontomys	Reithrodontomys mexicanus
89098	3	e5876464-bf25-4e31-8774-cbd79a411720	OL685394.1	94.444	91.916	90|94.444	9.19e-15	3.83334e-09	5.05e-40|1.15e-08	54	84	54|138	863	834.667	316|1325	16358	16358	16358|16358	Mammalia	Rodentia	Cricetidae	Holochilus	Holochilus sciureus
2136035	1	50249fa2-9b3b-4bdb-b745-c76f8adcdbc5	MG450794.1	94.444	94.444	94.444|94.444	1.16e-13	1.16e-13	1.16e-13|1.16e-13	54	54	54|54	720	720	720|720	16461	16461	16461|16461	Mammalia	Rodentia	Sciuridae	Cynomys	Cynomys gunnisoni
530178	6	8080b5bb-56a6-4401-9cd6-648e5e9199ef	KP778483.1	95.833	94.2007	91.501|96.39	7.64e-13	1.27333e-13	0|7.64e-13	48	387.5	48|655	1205	3075.5	773|11313	590	712.167	384|1325	Mammalia	Rodentia	Cricetidae	Nephelomys	Nephelomys albigularis
61157	1	19f4a35c-b16c-424a-bce9-a5240558c9b3	NC_053801.1	97.674	97.674	97.674|97.674	6.68e-12	6.68e-12	6.68e-12|6.68e-12	43	43	43|43	10409	10409	10409|10409	16272	16272	16272|16272	Mammalia	Rodentia	Muridae	Arvicanthis	Arvicanthis somalicus
89098	3	31bd9381-b75b-48ea-b7e2-0f31adf8f5aa	OL685394.1	90	91.916	90|94.444	1.15e-08	3.83334e-09	5.05e-40|1.15e-08	60	84	54|138	1325	834.667	316|1325	16358	16358	16358|16358	Mammalia	Rodentia	Cricetidae	Holochilus	Holochilus sciureus
JFD1588
subject.tax.id	Count	query.acc.ver	subject.acc.ver	X..identity	Average.X..identity	X..identity.range	evalue	Average.evalue	evalue.range	alignment.length	Average.alignment.length	alignment.length.range	query.length	Average.query.length	query.length.range	subject.length	Average.subject.length	subject.length.range	class	order	family	genus	species
530171	10	c383aa32-f54c-4d06-b9d8-2e1206133a8f	KP778263.1	96.197	92.7066	90.442|96.197	0	5.43e-77	0|5.43e-76	1157	553.3	185|1157	16376	3566.7	360|16376	1143	865.9	549|1143	Mammalia	Rodentia	Cricetidae	Handleyomys	Handleyomys alfaroi
530171	10	88741345-ab7d-4a04-9318-392c057fc06a	MZ364443.1	92.487	92.7066	90.442|96.197	0	5.43e-77	0|5.43e-76	559	553.3	185|1157	5385	3566.7	360|16376	549	865.9	549|1143	Mammalia	Rodentia	Cricetidae	Handleyomys	Handleyomys alfaroi
530171	10	b3a76666-66d2-462b-866b-5f8971d19313	KP778263.1	91.766	92.7066	90.442|96.197	0	5.43e-77	0|5.43e-76	668	553.3	185|1157	701	3566.7	360|16376	1143	865.9	549|1143	Mammalia	Rodentia	Cricetidae	Handleyomys	Handleyomys alfaroi
530171	10	ef8859ca-3813-4a12-a54e-03b449f3fb14	KP778632.1	91.418	92.7066	90.442|96.197	0	5.43e-77	0|5.43e-76	536	553.3	185|1157	664	3566.7	360|16376	620	865.9	549|1143	Mammalia	Rodentia	Cricetidae	Handleyomys	Handleyomys alfaroi
530171	10	9aba3bea-426b-43f7-83ea-342386ce044e	MZ364443.1	91.327	92.7066	90.442|96.197	0	5.43e-77	0|5.43e-76	565	553.3	185|1157	4836	3566.7	360|16376	549	865.9	549|1143	Mammalia	Rodentia	Cricetidae	Handleyomys	Handleyomys alfaroi
530171	10	f860532a-2656-4a82-94a0-5986ecb151b4	KP778590.1	91.29	92.7066	90.442|96.197	0	5.43e-77	0|5.43e-76	597	553.3	185|1157	1391	3566.7	360|16376	613	865.9	549|1143	Mammalia	Rodentia	Cricetidae	Handleyomys	Handleyomys alfaroi
530171	10	6c76430d-b170-4ca9-b240-c4e1a7859040	KP778590.1	90.442	92.7066	90.442|96.197	0	5.43e-77	0|5.43e-76	565	553.3	185|1157	1838	3566.7	360|16376	613	865.9	549|1143	Mammalia	Rodentia	Cricetidae	Handleyomys	Handleyomys alfaroi
530171	10	05eee468-a778-4391-9ef2-6fd7b1546dae	KP778263.1	92.031	92.7066	90.442|96.197	8.58e-147	5.43e-77	0|5.43e-76	389	553.3	185|1157	425	3566.7	360|16376	1143	865.9	549|1143	Mammalia	Rodentia	Cricetidae	Handleyomys	Handleyomys alfaroi
530171	10	2c629c6d-9d76-433b-822c-34817e57df39	KP778238.1	95.513	92.7066	90.442|96.197	1.29e-134	5.43e-77	0|5.43e-76	312	553.3	185|1157	3691	3566.7	360|16376	1143	865.9	549|1143	Mammalia	Rodentia	Cricetidae	Handleyomys	Handleyomys alfaroi
70284	1	a53c9372-9693-4c1f-9ecd-17b67673f954	MN058077.1	94.071	94.071	94.071|94.071	6.69e-102	0	6.69e-102|6.69e-102	253	253	253|253	1616	1616	1616|1616	16331	16331	16331|16331	Mammalia	Rodentia	Cricetidae	Microtus	Microtus cabrerae
530171	10	6b8782ec-8be3-40c4-8a13-1a3ee25cc00d	KP778263.1	94.595	92.7066	90.442|96.197	5.43e-76	5.43e-77	0|5.43e-76	185	553.3	185|1157	360	3566.7	360|16376	1143	865.9	549|1143	Mammalia	Rodentia	Cricetidae	Handleyomys	Handleyomys alfaroi
218834	1	57fa2c60-1a00-4225-8de7-c9304958f8ca	AY863422.1	92.958	92.958	92.958|92.958	8.13e-76	8.13e-76	8.13e-76|8.13e-76	213	213	213|213	530	530	530|530	1182	1182	1182|1182	Mammalia	Rodentia	Cricetidae	Pseudoryzomys	Pseudoryzomys simplex
10120	1	d9a61d07-6f9d-4ba3-9d86-b5ed763e00b6	NC_014871.1	91.457	91.457	91.457|91.457	1.06e-59	1.06e-59	1.06e-59|1.06e-59	199	199	199|199	770	770	770|770	16309	16309	16309|16309	Mammalia	Rodentia	Muridae	Rattus	Rattus sordidus
175522	1	d75bf3a9-bc80-4d95-bd2d-1682640c1113	ON165286.1	93.464	93.464	93.464|93.464	1.2e-50	1.2e-50	1.2e-50|1.2e-50	153	153	153|153	1197	1197	1197|1197	16362	16362	16362|16362	Mammalia	Rodentia	Cricetidae	Lagurus	Lagurus lagurus
146133	1	1dd990d9-50d8-47b8-87fe-dafb48ddebc8	OM330030.1	91.579	91.579	91.579|91.579	1.82e-21	1.82e-21	1.82e-21|1.82e-21	95	95	95|95	7997	7997	7997|7997	16363	16363	16363|16363	Mammalia	Rodentia	Spalacidae	Eospalax	Eospalax fontanierii
218826	1	d889d06b-4721-46b5-92e9-8fa7342769f0	MF696155.1	91.463	91.463	91.463|91.463	2.44e-21	2.44e-21	2.44e-21|2.44e-21	82	82	82|82	198	198	198|198	16314	16314	16314|16314	Mammalia	Rodentia	Cricetidae	Oligoryzomys	Oligoryzomys stramineus
89133	1	cf5a1270-2bf6-45ec-ab0c-e2406a933ea9	GU938909.1	91.176	91.176	91.176|91.176	5.74e-13	5.74e-13	5.74e-13|5.74e-13	68	68	68|68	3495	3495	3495|3495	666	666	666|666	Mammalia	Rodentia	Cricetidae	Thaptomys	Thaptomys nigrita
303926	1	4b2fcfbb-e40f-4393-bf6f-b8ce3ab34be6	MZ353591.1	92.857	92.857	92.857|92.857	5.5e-11	5.5e-11	5.5e-11|5.5e-11	56	56	56|56	5650	5650	5650|5650	16273	16273	16273|16273	Mammalia	Rodentia	Muridae	Lophuromys	Lophuromys melanonyx
218793	1	c4b2b6c1-7ae1-4029-bf9d-3575a28a61fc	MH939287.1	90.566	90.566	90.566|90.566	7.29e-08	7.29e-08	7.29e-08|7.29e-08	53	53	53|53	2149	2149	2149|2149	16309	16309	16309|16309	Mammalia	Rodentia	Cricetidae	Melanomys	Melanomys caliginosus
JFD1634
subject.tax.id	Count	query.acc.ver	subject.acc.ver	X..identity	Average.X..identity	X..identity.range	evalue	Average.evalue	evalue.range	alignment.length	Average.alignment.length	alignment.length.range	query.length	Average.query.length	query.length.range	subject.length	Average.subject.length	subject.length.range	class	order	family	genus	species
2964401	6	e36038a2-a924-4258-bf86-5d6f9cde0789	MZ364419.1	92.664	91.815	91.336|92.664	0	3.63333e-72	0|2.18e-71	518	491	212|661	544	4094	277|15934	658	601	544|658	Mammalia	Rodentia	Cricetidae	Nephelomys	Nephelomys childi
1734924	9	16418988-d640-47d4-8d6a-5e1c9178670e	MN547686.1	92.176	91.6398	90.303|93.258	0	3.81497e-92	0|3.43e-91	1112	629.667	267|1155	3087	4930.67	1069|15166	1149	924	592|1149	Mammalia	Rodentia	Cricetidae	Nephelomys	Nephelomys devius
2964401	6	1af7dd2e-c93f-46d1-9a73-5f8cbd0c247e	MZ364464.1	91.863	91.815	91.336|92.664	0	3.63333e-72	0|2.18e-71	553	491	212|661	5045	4094	277|15934	544	601	544|658	Mammalia	Rodentia	Cricetidae	Nephelomys	Nephelomys childi
2964401	6	b448c388-fa1b-4509-97d7-e46cec422502	MZ364421.1	91.528	91.815	91.336|92.664	0	3.63333e-72	0|2.18e-71	661	491	212|661	2179	4094	277|15934	658	601	544|658	Mammalia	Rodentia	Cricetidae	Nephelomys	Nephelomys childi
2964401	6	5794bbd4-1c53-47cf-b784-0ba0d6ac1b39	MZ364464.1	91.336	91.815	91.336|92.664	0	3.63333e-72	0|2.18e-71	554	491	212|661	15934	4094	277|15934	544	601	544|658	Mammalia	Rodentia	Cricetidae	Nephelomys	Nephelomys childi
1734924	9	9b069e0e-bc80-4bfd-91a3-4e3e9776813a	MN547686.1	91.332	91.6398	90.303|93.258	0	3.81497e-92	0|3.43e-91	1119	629.667	267|1155	12373	4930.67	1069|15166	1149	924	592|1149	Mammalia	Rodentia	Cricetidae	Nephelomys	Nephelomys devius
1734924	9	56efaac7-bed6-46ad-b3a0-76c63a62b3a9	KP778209.1	90.698	91.6398	90.303|93.258	0	3.81497e-92	0|3.43e-91	688	629.667	267|1155	15166	4930.67	1069|15166	1143	924	592|1149	Mammalia	Rodentia	Cricetidae	Nephelomys	Nephelomys devius
1734924	9	4c522598-77cb-463f-9dce-6ba68dd4fe66	MN547686.1	90.303	91.6398	90.303|93.258	0	3.81497e-92	0|3.43e-91	1155	629.667	267|1155	6261	4930.67	1069|15166	1149	924	592|1149	Mammalia	Rodentia	Cricetidae	Nephelomys	Nephelomys devius
269650	1	035560df-6125-4c35-926e-b33fec4627e9	OK323269.1	90.476	90.476	90.476|90.476	4.51e-163	0	4.51e-163|4.51e-163	504	504	504|504	755	755	755|755	16300	16300	16300|16300	Mammalia	Rodentia	Cricetidae	Chionomys	Chionomys roberti
530178	4	e58c3022-1e40-4758-a08b-e5aaa609513f	JF693848.1	94.041	92.7625	91.367|94.041	1.42e-158	4.425e-49	1.42e-158|1.77e-48	386	303	155|393	456	2070.25	456|6000	384	488.25	384|801	Mammalia	Rodentia	Cricetidae	Nephelomys	Nephelomys albigularis
530178	4	861db115-3c95-4f4c-97c8-8ea825203c36	JF693848.1	93.384	92.7625	91.367|94.041	4.47e-155	4.425e-49	1.42e-158|1.77e-48	393	303	155|393	6000	2070.25	456|6000	384	488.25	384|801	Mammalia	Rodentia	Cricetidae	Nephelomys	Nephelomys albigularis
2964401	6	5c39931a-dc3a-4719-8f99-f7fe4df44272	MZ364420.1	91.518	91.815	91.336|92.664	8.78e-151	3.63333e-72	0|2.18e-71	448	491	212|661	585	4094	277|15934	658	601	544|658	Mammalia	Rodentia	Cricetidae	Nephelomys	Nephelomys childi
1734924	9	f5f76eb0-3660-44df-b44c-14b281e36e3d	KP778654.1	91.563	91.6398	90.303|93.258	6.96e-140	3.81497e-92	0|3.43e-91	403	629.667	267|1155	1069	4930.67	1069|15166	592	924	592|1149	Mammalia	Rodentia	Cricetidae	Nephelomys	Nephelomys devius
530172	2	e01dc34e-e02e-47e3-bb1b-a5608e4c2772	KP778473.1	95.088	92.9035	90.719|95.088	4.56e-119	0	4.56e-119|2.95e-103	285	309.5	285|334	394	741.5	394|1089	610	610	610|610	Mammalia	Rodentia	Cricetidae	Handleyomys	Handleyomys rostratus
2904038	3	5bf0e139-a76e-4898-be1e-435c0f1a15ec	MZ736551.1	91.765	92.2333	91.406|93.529	3.76e-116	8.63333e-59	3.76e-116|2.59e-58	340	255.333	170|340	363	1931.33	363|4745	801	801	801|801	Mammalia	Rodentia	Cricetidae	Nephelomys	Nephelomys ricardopalmai
1734924	9	ed235b68-3a35-4a94-a34d-fbd21c856007	KP778481.1	92.429	91.6398	90.303|93.258	1.75e-115	3.81497e-92	0|3.43e-91	317	629.667	267|1155	1628	4930.67	1069|15166	592	924	592|1149	Mammalia	Rodentia	Cricetidae	Nephelomys	Nephelomys devius
1734924	9	65c39930-6f82-4ee5-a89f-7557f96dd090	KP778654.1	90.691	91.6398	90.303|93.258	1.3e-105	3.81497e-92	0|3.43e-91	333	629.667	267|1155	1107	4930.67	1069|15166	592	924	592|1149	Mammalia	Rodentia	Cricetidae	Nephelomys	Nephelomys devius
530171	1	1c8d1d54-ddae-440f-9285-e127527c8450	KP778470.1	93.056	93.056	93.056|93.056	4.66e-105	0	4.66e-105|4.66e-105	288	288	288|288	1017	1017	1017|1017	613	613	613|613	Mammalia	Rodentia	Cricetidae	Handleyomys	Handleyomys alfaroi
530172	2	9ae473e1-5244-41dc-a485-25ad51787860	KP778473.1	90.719	92.9035	90.719|95.088	2.95e-103	0	4.56e-119|2.95e-103	334	309.5	285|334	1089	741.5	394|1089	610	610	610|610	Mammalia	Rodentia	Cricetidae	Handleyomys	Handleyomys rostratus
89099	1	e17af3c0-e1e3-4d36-9d14-0bc9cbf6b6c3	KP027790.1	92.027	92.027	92.027|92.027	1.24e-102	0	1.24e-102|1.24e-102	301	301	301|301	1168	1168	1168|1168	860	860	860|860	Mammalia	Rodentia	Cricetidae	Hylaeamys	Hylaeamys megacephalus
106112	3	1380afc7-e5f7-4404-a6a6-5569bcd51001	KF769456.1	90.657	91.8403	90.476|94.388	2.85e-95	3.33333e-56	2.85e-95|1e-55	289	224.667	189|289	574	1761	574|2657	16378	16378	16378|16378	Mammalia	Rodentia	Cricetidae	Akodon	Akodon montensis
1734924	9	98f4f848-8e65-4478-b635-99add2ab2acc	MN547684.1	93.258	91.6398	90.303|93.258	3.47e-94	3.81497e-92	0|3.43e-91	267	629.667	267|1155	1756	4930.67	1069|15166	1149	924	592|1149	Mammalia	Rodentia	Cricetidae	Nephelomys	Nephelomys devius
1734924	9	18314f3b-8eb8-4440-9d83-14a7eb14410f	KP778272.1	92.308	91.6398	90.303|93.258	3.43e-91	3.81497e-92	0|3.43e-91	273	629.667	267|1155	1929	4930.67	1069|15166	801	924	592|1149	Mammalia	Rodentia	Cricetidae	Nephelomys	Nephelomys devius
530178	4	385573aa-6aa4-4248-87b3-b396de8d66b3	JF693848.1	91.367	92.7625	91.367|94.041	7.22e-91	4.425e-49	1.42e-158|1.77e-48	278	303	155|393	1052	2070.25	456|6000	384	488.25	384|801	Mammalia	Rodentia	Cricetidae	Nephelomys	Nephelomys albigularis
1890048	1	b06d0836-cfc1-4b5e-b0f8-6e0595614161	MN807609.1	90.657	90.657	90.657|90.657	2.64e-86	2.64e-86	2.64e-86|2.64e-86	289	289	289|289	2795	2795	2795|2795	16259	16259	16259|16259	Mammalia	Rodentia	Muridae	Aethomys	Aethomys nyikae
2964402	1	7435ab05-d0a7-4b97-b53b-2a4f854b4b2c	MZ364468.1	92.4	92.4	92.4|92.4	1.39e-85	1.39e-85	1.39e-85|1.39e-85	250	250	250|250	3762	3762	3762|3762	542	542	542|542	Mammalia	Rodentia	Cricetidae	Nephelomys	Nephelomys meridensis
1499496	1	9d19f7b5-3453-4ba5-98cd-0888604ca52d	KP778591.1	90.706	90.706	90.706|90.706	8.27e-82	8.27e-82	8.27e-82|8.27e-82	269	269	269|269	1654	1654	1654|1654	615	615	615|615	Mammalia	Rodentia	Cricetidae	Handleyomys	Handleyomys chapmani
2904038	3	d404d7cb-da85-4a06-b0b0-ab1bb5814902	MZ736551.1	91.406	92.2333	91.406|93.529	5.13e-81	8.63333e-59	3.76e-116|2.59e-58	256	255.333	170|340	686	1931.33	363|4745	801	801	801|801	Mammalia	Rodentia	Cricetidae	Nephelomys	Nephelomys ricardopalmai
89458	1	aeb8a8c8-1049-4baf-92b3-f6dcace64aeb	MT408180.1	92.609	92.609	92.609|92.609	1.64e-75	1.64e-75	1.64e-75|1.64e-75	230	230	230|230	15747	15747	15747|15747	16245	16245	16245|16245	Mammalia	Rodentia	Muridae	Stenocephalemys	Stenocephalemys albocaudata
106112	3	9f95337e-b7d7-4bc6-bcf6-1e12dd0e6af0	KF769456.1	94.388	91.8403	90.476|94.388	4.19e-75	3.33333e-56	2.85e-95|1e-55	196	224.667	189|289	2657	1761	574|2657	16378	16378	16378|16378	Mammalia	Rodentia	Cricetidae	Akodon	Akodon montensis
2964401	6	a8224a9b-d030-4c5c-b130-9c3597292ce0	MZ364463.1	91.981	91.815	91.336|92.664	2.18e-71	3.63333e-72	0|2.18e-71	212	491	212|661	277	4094	277|15934	544	601	544|658	Mammalia	Rodentia	Cricetidae	Nephelomys	Nephelomys childi
218826	2	1717524f-5f92-49f7-8696-289e6582cb8e	MF696155.1	90.079	90.6175	90.079|91.156	2.44e-68	2.725e-42	2.44e-68|5.45e-42	252	199.5	147|252	4916	2836.5	757|4916	16314	16314	16314|16314	Mammalia	Rodentia	Cricetidae	Oligoryzomys	Oligoryzomys stramineus
2904038	3	753d14a8-b716-418d-ba5a-0ec587fb8fb1	MZ736551.1	93.529	92.2333	91.406|93.529	2.59e-58	8.63333e-59	3.76e-116|2.59e-58	170	255.333	170|340	4745	1931.33	363|4745	801	801	801|801	Mammalia	Rodentia	Cricetidae	Nephelomys	Nephelomys ricardopalmai
29102	1	e4c801f5-12db-4c7e-bfbe-8a9dabc5adb3	AF296277.1	93.96	93.96	93.96|93.96	8.84e-56	8.84e-56	8.84e-56|8.84e-56	149	149	149|149	479	479	479|479	1287	1287	1287|1287	Mammalia	Rodentia	Cricetidae	Akodon	Akodon urichi
106112	3	1dc1f807-2f10-4cdb-baa2-34ea277cbbf5	KF769456.1	90.476	91.8403	90.476|94.388	1e-55	3.33333e-56	2.85e-95|1e-55	189	224.667	189|289	2052	1761	574|2657	16378	16378	16378|16378	Mammalia	Rodentia	Cricetidae	Akodon	Akodon montensis
3029580	2	e3a1fec5-38af-409c-b858-7f6b15aeb76c	OM810001.1	91.099	93.2055	91.099|95.312	1.29e-52	1.35e-18	1.29e-52|2.7e-18	191	127.5	64|191	767	6987	767|13207	16113	16080.5	16048|16113	Mammalia	Rodentia	Cricetidae	Lasiopodomys	Lasiopodomys anglicus
89150	2	47976207-50e2-4a4f-8eb8-3fd8d5eb1602	ON528119.1	94.286	93.143	92|94.286	2.46e-52	1.33e-08	2.46e-52|2.66e-08	140	95	50|140	1447	2251	1447|3055	16542	16574	16542|16606	Mammalia	Rodentia	Cricetidae	Reithrodontomys	Reithrodontomys mexicanus
530178	4	598599fc-e2a9-4415-9a5e-255d819e67cf	MZ736541.1	92.258	92.7625	91.367|94.041	1.77e-48	4.425e-49	1.42e-158|1.77e-48	155	303	155|393	773	2070.25	456|6000	801	488.25	384|801	Mammalia	Rodentia	Cricetidae	Nephelomys	Nephelomys albigularis
200942	1	1b1c41a6-c316-4815-aa41-8fea4d2d779b	AJ496312.1	90.503	90.503	90.503|90.503	1.88e-48	1.88e-48	1.88e-48|1.88e-48	179	179	179|179	12168	12168	12168|12168	941	941	941|941	Mammalia	Rodentia	Cricetidae	Oecomys	Oecomys rutilus
491861	1	ba216c98-d2b9-4f9d-8ff1-4b5466472765	NC_053796.1	90.303	90.303	90.303|90.303	1.14e-42	1.14e-42	1.14e-42|1.14e-42	165	165	165|165	621	621	621|621	16313	16313	16313|16313	Mammalia	Rodentia	Muridae	Grammomys	Grammomys surdaster
218826	2	88766f68-a954-4b6d-b14e-e3f184e7ec15	MF696155.1	91.156	90.6175	90.079|91.156	5.45e-42	2.725e-42	2.44e-68|5.45e-42	147	199.5	147|252	757	2836.5	757|4916	16314	16314	16314|16314	Mammalia	Rodentia	Cricetidae	Oligoryzomys	Oligoryzomys stramineus
218793	1	1878e84f-5d30-476d-8148-d95cebd4da09	MH939287.1	90.909	90.909	90.909|90.909	1.59e-39	1.59e-39	1.59e-39|1.59e-39	132	132	132|132	953	953	953|953	16309	16309	16309|16309	Mammalia	Rodentia	Cricetidae	Melanomys	Melanomys caliginosus
2494721	1	d0744777-5db1-4fc7-8505-a0389f1a7436	MZ353592.1	91.045	91.045	91.045|91.045	1.19e-37	1.19e-37	1.19e-37|1.19e-37	134	134	134|134	1202	1202	1202|1202	16274	16274	16274|16274	Mammalia	Rodentia	Muridae	Lophuromys	Lophuromys menageshae
2613866	1	fc10e26d-c7ed-4cb4-8240-e3f681794d7a	ON165313.1	91.667	91.667	91.667|91.667	5.47e-37	5.47e-37	5.47e-37|5.47e-37	132	132	132|132	377	377	377|377	16333	16333	16333|16333	Mammalia	Rodentia	Cricetidae	Neodon	Neodon sp. l BGI-2019
1433299	2	932ed10c-4266-465f-a73b-b42fa7a02efe	MT078818.1	92.373	91.7615	91.15|92.373	9.11e-37	1.525e-28	9.11e-37|3.05e-28	118	115.5	113|118	2344	3277.5	2344|4211	15975	15975	15975|15975	Mammalia	Rodentia	Cricetidae	Peromyscus	Peromyscus mekisturus
577681	1	d5f3b085-bdb7-4688-b9c2-174e82674a54	ON165314.1	90.625	90.625	90.625|90.625	1.39e-34	1.39e-34	1.39e-34|1.39e-34	128	128	128|128	415	415	415|415	16357	16357	16357|16357	Mammalia	Rodentia	Cricetidae	Eothenomys	Eothenomys chinensis
1047088	1	d159776c-0f20-48cb-9a00-d7d3d13e29af	ON165390.1	90.511	90.511	90.511|90.511	1.31e-33	1.31e-33	1.31e-33|1.31e-33	137	137	137|137	978	978	978|978	6666	6666	6666|6666	Mammalia	Rodentia	Cricetidae	Arvicola	Arvicola amphibius
322708	1	49982c83-1483-4584-8b02-ce64e70625d4	DQ138954.1	90.476	90.476	90.476|90.476	2.8e-33	2.8e-33	2.8e-33|2.8e-33	126	126	126|126	2065	2065	2065|2065	1494	1494	1494|1494	Mammalia	Rodentia	Cricetidae	Peromyscus	Peromyscus perfulvus
322709	1	1a6f98d6-b830-49eb-867f-b5f68154556f	ON528115.1	93.396	93.396	93.396|93.396	7.19e-32	7.19e-32	7.19e-32|7.19e-32	106	106	106|106	907	907	907|907	16340	16340	16340|16340	Mammalia	Rodentia	Cricetidae	Peromyscus	Peromyscus megalops
85953	1	9d54726e-041c-4e98-8b82-8d56f6b2a69c	MN792984.1	93.878	93.878	93.878|93.878	7.12e-31	7.12e-31	7.12e-31|7.12e-31	98	98	98|98	2275	2275	2275|2275	16340	16340	16340|16340	Mammalia	Rodentia	Cricetidae	Dicrostonyx	Dicrostonyx groenlandicus
492276	1	73293acd-1e66-4db9-ada0-742654d8cadc	EU192185.1	90.741	90.741	90.741|90.741	2.81e-28	2.81e-28	2.81e-28|2.81e-28	108	108	108|108	273	273	273|273	952	952	952|952	Mammalia	Rodentia	Cricetidae	Oligoryzomys	Oligoryzomys sp. B MUSA2625
1433299	2	c07cff7b-b191-4b12-b103-d73e3b11b8f1	MT078818.1	91.15	91.7615	91.15|92.373	3.05e-28	1.525e-28	9.11e-37|3.05e-28	113	115.5	113|118	4211	3277.5	2344|4211	15975	15975	15975|15975	Mammalia	Rodentia	Cricetidae	Peromyscus	Peromyscus mekisturus
209855	1	e5ffc1d7-62a1-4236-a288-19dd0942c045	MZ131550.1	93.478	93.478	93.478|93.478	1.06e-26	1.06e-26	1.06e-26|1.06e-26	92	92	92|92	648	648	648|648	16254	16254	16254|16254	Mammalia	Rodentia	Muridae	Hylomyscus	Hylomyscus parvus
10094	1	776f1035-d345-4c8a-b659-3b3eaae57342	MN964116.1	92.473	92.473	92.473|92.473	1.72e-26	1.72e-26	1.72e-26|1.72e-26	93	93	93|93	282	282	282|282	11448	11448	11448|11448	Mammalia	Rodentia	Muridae	Mus	Mus saxicola
218824	1	e14aef2c-3dab-415a-951d-b5dc4b3decd7	JQ627262.1	93.258	93.258	93.258|93.258	1.74e-26	1.74e-26	1.74e-26|1.74e-26	89	89	89|89	15761	15761	15761|15761	576	576	576|576	Mammalia	Rodentia	Cricetidae	Oligoryzomys	Oligoryzomys flavescens
186193	2	ee382eeb-3d64-4d96-809c-944cbb1434ee	KJ530563.1	90.909	90.616	90.323|90.909	4.65e-26	7.15002e-21	4.65e-26|1.43e-20	110	101.5	93|110	2795	9470.5	2795|16146	16312	16312	16312|16312	Mammalia	Rodentia	Muridae	Mus	Mus fragilicauda
128105	2	c92a3cc5-2d05-4c4a-8ebf-360b44e6ef7c	KX755310.1	94.805	92.7635	90.722|94.805	1.16e-25	3.6458e-23	1.16e-25|7.28e-23	77	87	77|97	476	868.5	476|1261	16929	16869.5	16810|16929	Mammalia	Rodentia	Echimyidae	Proechimys	Proechimys guyannensis
537921	1	f818182a-24ce-40c2-b0b3-5acd290608f9	MT381940.1	94.872	94.872	94.872|94.872	8.86e-25	8.86e-25	8.86e-25|8.86e-25	78	78	78|78	3504	3504	3504|3504	16350	16350	16350|16350	Mammalia	Rodentia	Cricetidae	Myodes	Myodes centralis
1477902	1	812d9148-2b83-40fe-9126-493c81723a65	MT381924.1	93.976	93.976	93.976|93.976	1.15e-24	1.15e-24	1.15e-24|1.15e-24	83	83	83|83	317	317	317|317	16403	16403	16403|16403	Mammalia	Rodentia	Cricetidae	Alticola	Alticola olchonensis
303926	1	756151c0-d1a0-4370-b08e-ddf36f719fed	MZ353591.1	93.75	93.75	93.75|93.75	2.59e-24	2.59e-24	2.59e-24|2.59e-24	80	80	80|80	2629	2629	2629|2629	16273	16273	16273|16273	Mammalia	Rodentia	Muridae	Lophuromys	Lophuromys melanonyx
398451	1	3e18d68e-6365-473f-a15c-b51a6e81e3fa	MN019571.1	90.265	90.265	90.265|90.265	2.85e-24	2.85e-24	2.85e-24|2.85e-24	113	113	113|113	756	756	756|756	1542	1542	1542|1542	Mammalia	Rodentia	Cricetidae	Oligoryzomys	Oligoryzomys moojeni
128105	2	fdac6a5d-6794-4be9-be23-f2bef55211ae	KX755305.1	90.722	92.7635	90.722|94.805	7.28e-23	3.6458e-23	1.16e-25|7.28e-23	97	87	77|97	1261	868.5	476|1261	16810	16869.5	16810|16929	Mammalia	Rodentia	Echimyidae	Proechimys	Proechimys guyannensis
186193	2	f7e3ddfc-e90c-4dab-96a4-d59759656f94	KJ530563.1	90.323	90.616	90.323|90.909	1.43e-20	7.15002e-21	4.65e-26|1.43e-20	93	101.5	93|110	16146	9470.5	2795|16146	16312	16312	16312|16312	Mammalia	Rodentia	Muridae	Mus	Mus fragilicauda
303928	1	31d0b32a-26e1-49e1-b7dc-6080a9f0d065	MZ353590.1	93.421	93.421	93.421|93.421	4.89e-20	4.89e-20	4.89e-20|4.89e-20	76	76	76|76	3640	3640	3640|3640	16276	16276	16276|16276	Mammalia	Rodentia	Muridae	Lophuromys	Lophuromys chrysopus
10112	1	52114e54-e7dd-4a43-9bbc-06942a0be991	MG017593.1	90.217	90.217	90.217|90.217	8.88e-20	8.88e-20	8.88e-20|8.88e-20	92	92	92|92	1705	1705	1705|1705	16215	16215	16215|16215	Mammalia	Rodentia	Muridae	Mastomys	Mastomys natalensis
337583	1	be046813-8acd-4d7e-acf8-30b2cac05939	MN845675.1	91.566	91.566	91.566|91.566	4.84e-19	4.84e-19	4.84e-19|4.84e-19	83	83	83|83	2380	2380	2380|2380	9050	9050	9050|9050	Mammalia	Rodentia	Muridae	Hylomyscus	Hylomyscus baeri
121566	1	a4950aba-1bac-4ecd-888c-3fcb73cf71aa	NC_053799.1	94.118	94.118	94.118|94.118	2.25e-18	2.25e-18	2.25e-18|2.25e-18	68	68	68|68	742	742	742|742	16254	16254	16254|16254	Mammalia	Rodentia	Muridae	Lemniscomys	Lemniscomys rosalia
3029580	2	1c4a1996-f08c-446f-b331-c59e2008b105	OM809908.1	95.312	93.2055	91.099|95.312	2.7e-18	1.35e-18	1.29e-52|2.7e-18	64	127.5	64|191	13207	6987	767|13207	16048	16080.5	16048|16113	Mammalia	Rodentia	Cricetidae	Lasiopodomys	Lasiopodomys anglicus
42412	1	483c5eb0-209b-4480-91a0-161ded9225b1	U40247.1	97.872	97.872	97.872|97.872	3.14e-15	3.14e-15	3.14e-15|3.14e-15	47	47	47|47	307	307	307|307	1437	1437	1437|1437	Mammalia	Rodentia	Cricetidae	Peromyscus	Peromyscus melanotis
798169	1	52f975b0-b325-4fa1-9c90-aa46bfc61fa3	ON165360.1	90.123	90.123	90.123|90.123	2.67e-14	2.67e-14	2.67e-14|2.67e-14	81	81	81|81	2466	2466	2466|2466	16336	16336	16336|16336	Mammalia	Rodentia	Cricetidae	Neodon	Neodon sikimensis
13151	1	f097d002-5597-405e-afaa-5bad61ab0ecf	MT410898.1	90.541	90.541	90.541|90.541	9.06e-14	9.06e-14	9.06e-14|9.06e-14	74	74	74|74	2154	2154	2154|2154	16241	16241	16241|16241	Mammalia	Rodentia	Muridae	Micromys	Micromys minutus
476587	1	475a8391-5af6-4407-96db-927f88cc50e9	MZ131569.1	95.745	95.745	95.745|95.745	2.85e-12	2.85e-12	2.85e-12|2.85e-12	47	47	47|47	310	310	310|310	16244	16244	16244|16244	Mammalia	Rodentia	Muridae	Praomys	Praomys rostratus
1936103	1	4df4417d-becf-4b38-b0b5-789b53ac9008	KY464174.1	90.278	90.278	90.278|90.278	2.96e-12	2.96e-12	2.96e-12|2.96e-12	72	72	72|72	4624	4624	4624|4624	16298	16298	16298|16298	Mammalia	Rodentia	Muridae	Sundamys	Sundamys infraluteus
407171	1	8457c79d-73cc-4780-898d-34cc3185e292	MT614214.1	100	100	100|100	1.21e-11	1.21e-11	1.21e-11|1.21e-11	37	37	37|37	1257	1257	1257|1257	16557	16557	16557|16557	Mammalia	Rodentia	Cricetidae	Lasiopodomys	Lasiopodomys brandtii
85047	1	dc1af0bb-e832-4abc-8966-3314166970eb	MG182016.1	90.625	90.625	90.625|90.625	2.94e-11	2.94e-11	2.94e-11|2.94e-11	64	64	64|64	789	789	789|789	16310	16310	16310|16310	Mammalia	Rodentia	Cricetidae	Neotoma	Neotoma magister
447135	2	313bfae3-45b3-4d77-9359-96bc5734376b	KM892834.1	91.228	90.8065	90.385|91.228	5.55e-09	3.2475e-08	5.55e-09|5.94e-08	57	54.5	52|57	2480	2117	1754|2480	16354	16320.5	16287|16354	Mammalia	Rodentia	Cricetidae	Myodes	Myodes glareolus
10096	1	6600fdee-7f59-4647-8fae-ed8e9c4a45c4	MW209725.1	93.617	93.617	93.617|93.617	6.27e-09	6.27e-09	6.27e-09|6.27e-09	47	47	47|47	10882	10882	10882|10882	16302	16302	16302|16302	Mammalia	Rodentia	Muridae	Mus	Mus spretus
89150	2	da53a106-898a-420c-9e93-61e37c159dce	KY707307.1	92	93.143	92|94.286	2.66e-08	1.33e-08	2.46e-52|2.66e-08	50	95	50|140	3055	2251	1447|3055	16606	16574	16542|16606	Mammalia	Rodentia	Cricetidae	Reithrodontomys	Reithrodontomys mexicanus
447135	2	cff865ef-6be4-44c6-97b5-5adf0e92e03b	MN103018.1	90.385	90.8065	90.385|91.228	5.94e-08	3.2475e-08	5.55e-09|5.94e-08	52	54.5	52|57	1754	2117	1754|2480	16287	16320.5	16287|16354	Mammalia	Rodentia	Cricetidae	Myodes	Myodes glareolus
907928	1	5a3daaf9-87fb-4479-9a6c-9659f80d3d75	KY117562.1	91.489	91.489	91.489|91.489	6.83e-08	6.83e-08	6.83e-08|6.83e-08	47	47	47|47	2015	2015	2015|2015	16296	16296	16296|16296	Mammalia	Rodentia	Muridae	Maxomys	Maxomys rajah
2048992	1	c2658c3d-23d2-4f02-88d4-ea9181aa8207	ON165296.1	96.97	96.97	96.97|96.97	2.86e-06	2.86e-06	2.86e-06|2.86e-06	33	33	33|33	1431	1431	1431|1431	16341	16341	16341|16341	Mammalia	Rodentia	Cricetidae	Eothenomys	Eothenomys shimianensis
JFD1633
subject.tax.id	Count	query.acc.ver	subject.acc.ver	X..identity	Average.X..identity	X..identity.range	evalue	Average.evalue	evalue.range	alignment.length	Average.alignment.length	alignment.length.range	query.length	Average.query.length	query.length.range	subject.length	Average.subject.length	subject.length.range	class	order	family	genus	species
2964401	14	9242a56a-241e-4db4-af98-2d4846e11a13	MZ364464.1	93.697	92.1644	90.123|94.49	0	1.07143e-70	0|1.5e-69	476	508.5	243|667	2510	5012.64	584|13484	544	584.714	544|658	Mammalia	Rodentia	Cricetidae	Nephelomys	Nephelomys childi
2964401	14	7ad07522-38a3-4ddd-90be-87d9b2d95e8e	MZ364464.1	93.478	92.1644	90.123|94.49	0	1.07143e-70	0|1.5e-69	552	508.5	243|667	1578	5012.64	584|13484	544	584.714	544|658	Mammalia	Rodentia	Cricetidae	Nephelomys	Nephelomys childi
2964401	14	9329f288-f23c-4b4b-afe7-01b9412adf61	MZ364464.1	93.345	92.1644	90.123|94.49	0	1.07143e-70	0|1.5e-69	556	508.5	243|667	5945	5012.64	584|13484	544	584.714	544|658	Mammalia	Rodentia	Cricetidae	Nephelomys	Nephelomys childi
2964401	14	28d00c34-2650-42ab-bbab-a0928785fdfb	MZ364464.1	93.345	92.1644	90.123|94.49	0	1.07143e-70	0|1.5e-69	556	508.5	243|667	5938	5012.64	584|13484	544	584.714	544|658	Mammalia	Rodentia	Cricetidae	Nephelomys	Nephelomys childi
2964401	14	1bac835c-3da6-46d5-b662-3a33ad94808d	MZ364463.1	92.701	92.1644	90.123|94.49	0	1.07143e-70	0|1.5e-69	548	508.5	243|667	1831	5012.64	584|13484	544	584.714	544|658	Mammalia	Rodentia	Cricetidae	Nephelomys	Nephelomys childi
2964401	14	a4fa5508-77a1-4f1c-998d-9c5d040da6ad	MZ364420.1	92	92.1644	90.123|94.49	0	1.07143e-70	0|1.5e-69	650	508.5	243|667	7013	5012.64	584|13484	658	584.714	544|658	Mammalia	Rodentia	Cricetidae	Nephelomys	Nephelomys childi
2964401	14	67c66081-b4c7-49c7-bd77-d31817632a20	MZ364464.1	91.786	92.1644	90.123|94.49	0	1.07143e-70	0|1.5e-69	560	508.5	243|667	9808	5012.64	584|13484	544	584.714	544|658	Mammalia	Rodentia	Cricetidae	Nephelomys	Nephelomys childi
2964401	14	19612c80-5c4f-40dd-82c7-3301182fc45b	MZ364464.1	91.741	92.1644	90.123|94.49	0	1.07143e-70	0|1.5e-69	557	508.5	243|667	6863	5012.64	584|13484	544	584.714	544|658	Mammalia	Rodentia	Cricetidae	Nephelomys	Nephelomys childi
1734924	3	09b944c3-94d5-4b82-a09c-939ec30e8651	MN547686.1	91.652	92.158	91.396|93.426	0	0	0|1.84e-111	1102	638	289|1102	8929	3276.33	337|8929	1149	963.333	592|1149	Mammalia	Rodentia	Cricetidae	Nephelomys	Nephelomys devius
2964401	14	9ae3892c-970e-49a2-b1c4-ba519c4ae4cc	MZ364421.1	90.405	92.1644	90.123|94.49	0	1.07143e-70	0|1.5e-69	667	508.5	243|667	6577	5012.64	584|13484	658	584.714	544|658	Mammalia	Rodentia	Cricetidae	Nephelomys	Nephelomys childi
2964401	14	796aa078-bab6-4d62-b176-ab54534d67ac	MZ364420.1	90.318	92.1644	90.123|94.49	0	1.07143e-70	0|1.5e-69	661	508.5	243|667	2534	5012.64	584|13484	658	584.714	544|658	Mammalia	Rodentia	Cricetidae	Nephelomys	Nephelomys childi
1734924	3	2ea1b01d-a411-415b-8a03-2191d25d1337	MN547700.1	91.396	92.158	91.396|93.426	4.6e-172	0	0|1.84e-111	523	638	289|1102	563	3276.33	337|8929	1149	963.333	592|1149	Mammalia	Rodentia	Cricetidae	Nephelomys	Nephelomys devius
2904038	1	6b5fc274-2c46-4c92-a7a2-81ff9cf7cf14	MZ736558.1	90.075	90.075	90.075|90.075	6.98e-162	0	6.98e-162|6.98e-162	534	534	534|534	770	770	770|770	801	801	801|801	Mammalia	Rodentia	Cricetidae	Nephelomys	Nephelomys ricardopalmai
2964401	14	bb7a46bc-2c64-4738-8b17-f90baed517f4	MZ364464.1	94.49	92.1644	90.123|94.49	3.55e-151	1.07143e-70	0|1.5e-69	363	508.5	243|667	913	5012.64	584|13484	544	584.714	544|658	Mammalia	Rodentia	Cricetidae	Nephelomys	Nephelomys childi
2964401	14	75562283-bbce-44c3-bbd9-a9e624c26fd2	MZ364421.1	92.727	92.1644	90.123|94.49	2.75e-144	1.07143e-70	0|1.5e-69	385	508.5	243|667	584	5012.64	584|13484	658	584.714	544|658	Mammalia	Rodentia	Cricetidae	Nephelomys	Nephelomys childi
530178	2	4b90e655-5ed3-4cbe-babc-8ad31637101a	JF693848.1	92.092	91.676	91.26|92.092	5.79e-143	0	5.79e-143|3.19e-133	392	390.5	389|392	11953	8977.5	6002|11953	384	384	384|384	Mammalia	Rodentia	Cricetidae	Nephelomys	Nephelomys albigularis
530178	2	a9517249-296e-4854-863b-faf15dd36b81	JF693848.1	91.26	91.676	91.26|92.092	3.19e-133	0	5.79e-143|3.19e-133	389	390.5	389|392	6002	8977.5	6002|11953	384	384	384|384	Mammalia	Rodentia	Cricetidae	Nephelomys	Nephelomys albigularis
1734924	3	3a9fcac1-315b-45e9-8ef9-f611c2682e50	KP778654.1	93.426	92.158	91.396|93.426	1.84e-111	0	0|1.84e-111	289	638	289|1102	337	3276.33	337|8929	592	963.333	592|1149	Mammalia	Rodentia	Cricetidae	Nephelomys	Nephelomys devius
2964401	14	57a38bb1-06db-4d1d-8796-6d5a31a544c5	MZ364420.1	90.145	92.1644	90.123|94.49	3.71e-102	1.07143e-70	0|1.5e-69	345	508.5	243|667	13484	5012.64	584|13484	658	584.714	544|658	Mammalia	Rodentia	Cricetidae	Nephelomys	Nephelomys childi
200942	1	5a878b83-4d5b-4be5-8297-1f5f0ae9392a	KX381536.1	90.365	90.365	90.365|90.365	2.03e-91	2.03e-91	2.03e-91|2.03e-91	301	301	301|301	1151	1151	1151|1151	336	336	336|336	Mammalia	Rodentia	Cricetidae	Oecomys	Oecomys rutilus
89098	2	31169322-aea0-4024-b128-d4f3808288c3	OL685394.1	90.31	90.2445	90.179|90.31	2.3e-78	2.105e-64	2.3e-78|4.21e-64	258	241	224|258	352	389	352|426	16358	16358	16358|16358	Mammalia	Rodentia	Cricetidae	Holochilus	Holochilus sciureus
2964401	14	796c40a9-4b63-4bba-bd86-bb48f056b8cf	MZ364463.1	90.123	92.1644	90.123|94.49	1.5e-69	1.07143e-70	0|1.5e-69	243	508.5	243|667	4599	5012.64	584|13484	544	584.714	544|658	Mammalia	Rodentia	Cricetidae	Nephelomys	Nephelomys childi
89098	2	99217aa3-8357-4bdd-9156-9526c87a2b9a	OL685394.1	90.179	90.2445	90.179|90.31	4.21e-64	2.105e-64	2.3e-78|4.21e-64	224	241	224|258	426	389	352|426	16358	16358	16358|16358	Mammalia	Rodentia	Cricetidae	Holochilus	Holochilus sciureus
218826	3	f8396590-19ac-4554-9b2a-782d82448d7d	MF696155.1	90.955	90.78	90.476|90.955	1.87e-59	1.95667e-38	1.87e-59|5.87e-38	199	170	143|199	360	5871.67	360|14962	16314	16314	16314|16314	Mammalia	Rodentia	Cricetidae	Oligoryzomys	Oligoryzomys stramineus
106112	2	f440db07-d70b-473d-976d-cc81bdac6620	KF769456.1	92.655	94.919	92.655|97.183	1.46e-58	5.2e-25	1.46e-58|1.04e-24	177	124	71|177	702	8307	702|15912	16378	16378	16378|16378	Mammalia	Rodentia	Cricetidae	Akodon	Akodon montensis
218826	3	89bc835a-f692-47d7-9d81-9f435e3f6083	MF696155.1	90.476	90.78	90.476|90.955	2.07e-45	1.95667e-38	1.87e-59|5.87e-38	168	170	143|199	14962	5871.67	360|14962	16314	16314	16314|16314	Mammalia	Rodentia	Cricetidae	Oligoryzomys	Oligoryzomys stramineus
1433299	3	ade40db1-be42-42df-af63-2397c1ae9e2d	MT078818.1	94.118	92.1133	90|94.118	4.33e-41	5.36667e-24	4.33e-41|1.61e-23	119	109.667	90|120	5895	7695.33	948|16243	15975	15975	15975|15975	Mammalia	Rodentia	Cricetidae	Peromyscus	Peromyscus mekisturus
146133	1	8b27dc0e-895c-47f0-8d38-9f0cee0575d9	KC514112.1	92.086	92.086	92.086|92.086	2.6e-40	2.6e-40	2.6e-40|2.6e-40	139	139	139|139	2343	2343	2343|2343	16354	16354	16354|16354	Mammalia	Rodentia	Spalacidae	Eospalax	Eospalax fontanierii
97206	1	2fa8e940-afab-48c8-9c36-23b4e7633c7d	ON528112.1	90.78	90.78	90.78|90.78	3.21e-40	3.21e-40	3.21e-40|3.21e-40	141	141	141|141	753	753	753|753	16433	16433	16433|16433	Mammalia	Rodentia	Cricetidae	Peromyscus	Peromyscus attwateri
218826	3	5729e30a-5d63-45ff-a1c1-dab7d16205dd	MF696155.1	90.909	90.78	90.476|90.955	5.87e-38	1.95667e-38	1.87e-59|5.87e-38	143	170	143|199	2293	5871.67	360|14962	16314	16314	16314|16314	Mammalia	Rodentia	Cricetidae	Oligoryzomys	Oligoryzomys stramineus
92538	1	6ab0a11c-7363-4ae0-8404-38e749957325	OL752780.1	90.071	90.071	90.071|90.071	4.14e-37	4.14e-37	4.14e-37|4.14e-37	141	141	141|141	290	290	290|290	16341	16341	16341|16341	Mammalia	Rodentia	Cricetidae	Dicrostonyx	Dicrostonyx hudsonius
1433299	3	428b2ad7-5652-40f3-8c19-3185f94e0a3f	MT078818.1	90	92.1133	90|94.118	4.96e-33	5.36667e-24	4.33e-41|1.61e-23	120	109.667	90|120	948	7695.33	948|16243	15975	15975	15975|15975	Mammalia	Rodentia	Cricetidae	Peromyscus	Peromyscus mekisturus
1330375	1	f806eadc-35e3-4453-8b5c-8f77000990de	KY464167.1	94.118	94.118	94.118|94.118	1.34e-32	1.34e-32	1.34e-32|1.34e-32	102	102	102|102	2525	2525	2525|2525	16308	16308	16308|16308	Mammalia	Rodentia	Muridae	Bunomys	Bunomys penitus
48011	1	eb337c8d-5f25-45c9-ab74-19d84479a1db	KX381448.1	91.2	91.2	91.2|91.2	4.25e-32	4.25e-32	4.25e-32|4.25e-32	125	125	125|125	2061	2061	2061|2061	336	336	336|336	Mammalia	Rodentia	Cricetidae	Oecomys	Oecomys bicolor
530184	1	00fb5075-6fce-4698-bc9d-4a59080f19d5	MZ364477.1	91.27	91.27	91.27|91.27	5.11e-32	5.11e-32	5.11e-32|5.11e-32	126	126	126|126	9602	9602	9602|9602	546	546	546|546	Mammalia	Rodentia	Cricetidae	Transandinomys	Transandinomys talamancae
83761	2	b615e27b-9fbc-4aba-90c8-b1a71a37f6ac	MW209719.1	98.701	97.4985	96.296|98.701	5.48e-32	1.02774e-29	5.48e-32|2.05e-29	77	79	77|81	10300	5708.5	1117|10300	16300	16300	16300|16300	Mammalia	Rodentia	Muridae	Sundamys	Sundamys muelleri
83761	2	063337eb-1dfa-42a9-bc38-a8ddc2dbf50c	MW209719.1	96.296	97.4985	96.296|98.701	2.05e-29	1.02774e-29	5.48e-32|2.05e-29	81	79	77|81	1117	5708.5	1117|10300	16300	16300	16300|16300	Mammalia	Rodentia	Muridae	Sundamys	Sundamys muelleri
128105	3	708c25bb-3105-4e38-b507-84160d733e7b	KX755310.1	96.154	93.3763	91.667|96.154	6.42e-29	3.73342e-15	6.42e-29|1.12e-14	78	75.6667	65|84	244	2173.33	244|5230	16929	16851.3	16802|16929	Mammalia	Rodentia	Echimyidae	Proechimys	Proechimys guyannensis
34858	1	e7af917b-2482-45b6-890c-b669bb943f35	MN845648.1	92.784	92.784	92.784|92.784	2.02e-26	2.02e-26	2.02e-26|2.02e-26	97	97	97|97	4716	4716	4716|4716	16253	16253	16253|16253	Mammalia	Rodentia	Muridae	Hylomyscus	Hylomyscus alleni
106112	2	89d3ee65-2824-4650-a9e9-bb8b17c464c3	KF769456.1	97.183	94.919	92.655|97.183	1.04e-24	5.2e-25	1.46e-58|1.04e-24	71	124	71|177	15912	8307	702|15912	16378	16378	16378|16378	Mammalia	Rodentia	Cricetidae	Akodon	Akodon montensis
83755	1	4b802c64-a70a-40bb-9671-d29085965a07	OP251025.1	92.473	92.473	92.473|92.473	6.76e-24	6.76e-24	6.76e-24|6.76e-24	93	93	93|93	6844	6844	6844|6844	16449	16449	16449|16449	Mammalia	Rodentia	Muridae	Rattus	Rattus tiomanicus
1433299	3	18e16897-1fe0-4518-b212-abcbf70a0d31	MT078818.1	92.222	92.1133	90|94.118	1.61e-23	5.36667e-24	4.33e-41|1.61e-23	90	109.667	90|120	16243	7695.33	948|16243	15975	15975	15975|15975	Mammalia	Rodentia	Cricetidae	Peromyscus	Peromyscus mekisturus
340180	1	b4d26c36-d87e-400a-b290-4e48ffbdee8e	KU940256.1	96.923	96.923	96.923|96.923	1.86e-22	1.86e-22	1.86e-22|1.86e-22	65	65	65|65	834	834	834|834	16373	16373	16373|16373	Mammalia	Rodentia	Laonastidae	Laonastes	Laonastes aenigmamus
128105	3	6881d824-ef13-410d-a242-a918c95e40a3	KX688181.1	91.667	93.3763	91.667|96.154	2.74e-19	3.73342e-15	6.42e-29|1.12e-14	84	75.6667	65|84	5230	2173.33	244|5230	16823	16851.3	16802|16929	Mammalia	Rodentia	Echimyidae	Proechimys	Proechimys guyannensis
491754	1	cd31050c-66bb-41f6-904f-5c2b6d303dd4	NC_053797.1	96.61	96.61	96.61|96.61	1.56e-18	1.56e-18	1.56e-18|1.56e-18	59	59	59|59	7609	7609	7609|7609	16333	16333	16333|16333	Mammalia	Rodentia	Muridae	Grammomys	Grammomys dolichurus
42412	1	59c1ab97-76b4-4b28-a6d2-a39b9d07e851	U40247.1	93.056	93.056	93.056|93.056	5.07e-18	5.07e-18	5.07e-18|5.07e-18	72	72	72|72	1647	1647	1647|1647	1437	1437	1437|1437	Mammalia	Rodentia	Cricetidae	Peromyscus	Peromyscus melanotis
1353928	1	675f7078-f006-4387-afc0-cb8c31ae13bc	KF769457.1	96.429	96.429	96.429|96.429	2.06e-16	2.06e-16	2.06e-16|2.06e-16	56	56	56|56	4383	4383	4383|4383	16346	16346	16346|16346	Mammalia	Rodentia	Cricetidae	Wiedomys	Wiedomys cerradensis
51338	1	4947e2d3-68bc-45e8-8e0a-5547fb823f28	KY311838.1	96.364	96.364	96.364|96.364	7.16e-16	7.16e-16	7.16e-16|7.16e-16	55	55	55|55	3911	3911	3911|3911	16767	16767	16767|16767	Mammalia	Rodentia	Castoridae	Castor	Castor canadensis
491861	1	e5cfc8ee-46ed-4de7-af08-4b938c61deb8	OP764676.1	92.537	92.537	92.537|92.537	1.46e-15	1.46e-15	1.46e-15|1.46e-15	67	67	67|67	7968	7968	7968|7968	16227	16227	16227|16227	Mammalia	Rodentia	Muridae	Grammomys	Grammomys surdaster
209871	1	76073a00-979c-47c3-a8b8-bfbf96664737	MN964123.1	90.789	90.789	90.789|90.789	5.44e-15	5.44e-15	5.44e-15|5.44e-15	76	76	76|76	1966	1966	1966|1966	16246	16246	16246|16246	Mammalia	Rodentia	Muridae	Heimyscus	Heimyscus fumosus
2033319	1	0c646b1a-fe34-49be-bb7f-51b38354f746	KX768720.1	90.667	90.667	90.667|90.667	1.1e-14	1.1e-14	1.1e-14|1.1e-14	75	75	75|75	3974	3974	3974|3974	16814	16814	16814|16814	Mammalia	Rodentia	Echimyidae	Proechimys	Proechimys pattoni
128105	3	b7c2a85f-570e-40e9-a1a9-2e9852352117	KX755306.1	92.308	93.3763	91.667|96.154	1.12e-14	3.73342e-15	6.42e-29|1.12e-14	65	75.6667	65|84	1046	2173.33	244|5230	16802	16851.3	16802|16929	Mammalia	Rodentia	Echimyidae	Proechimys	Proechimys guyannensis
218793	1	d9a38f93-cb73-4825-9533-f6ead93db558	MH939287.1	93.22	93.22	93.22|93.22	3.49e-13	3.49e-13	3.49e-13|3.49e-13	59	59	59|59	8248	8248	8248|8248	16309	16309	16309|16309	Mammalia	Rodentia	Cricetidae	Melanomys	Melanomys caliginosus
108582	1	b16891d9-5013-4d6e-9231-72db2af82edd	MZ030792.1	94	94	94|94	1.69e-12	1.69e-12	1.69e-12|1.69e-12	50	50	50|50	2640	2640	2640|2640	16561	16561	16561|16561	Mammalia	Rodentia	Geomyidae	Geomys	Geomys arenarius
399230	1	88633ee6-9064-488b-89b1-ef444cba1e82	ON165297.1	100	100	100|100	5.01e-11	5.01e-11	5.01e-11|5.01e-11	37	37	37|37	5143	5143	5143|5143	16245	16245	16245|16245	Mammalia	Rodentia	Cricetidae	Neodon	Neodon leucurus
322709	1	3a5d8c5d-0523-43a1-a012-fc5b94c7fb12	KY707305.1	93.617	93.617	93.617|93.617	4.91e-10	4.91e-10	4.91e-10|4.91e-10	47	47	47|47	869	869	869|869	16821	16821	16821|16821	Mammalia	Rodentia	Cricetidae	Peromyscus	Peromyscus megalops
504099	1	eb11519a-b1a2-43b9-b356-1123f2b4bd8a	KT834971.1	91.228	91.228	91.228|91.228	5.93e-09	5.93e-09	5.93e-09|5.93e-09	57	57	57|57	2650	2650	2650|2650	16393	16393	16393|16393	Mammalia	Rodentia	Muridae	Meriones	Meriones tamariscinus
907928	1	4c51894d-a8ba-495b-aa8f-bc45b1927dd6	KY117564.1	94.872	94.872	94.872|94.872	2.76e-07	2.76e-07	2.76e-07|2.76e-07	39	39	39|39	2089	2089	2089|2089	16200	16200	16200|16200	Mammalia	Rodentia	Muridae	Maxomys	Maxomys rajah
771787	1	48bec55a-20fb-48b2-993f-f0679797e174	MG833880.1	100	100	100|100	1.08e-06	1.08e-06	1.08e-06|1.08e-06	28	28	28|28	550	550	550|550	16328	16328	16328|16328	Mammalia	Rodentia	Cricetidae	Neodon	Neodon fuscus
2042645	1	91abb315-1a4f-413f-bf48-b9ff9048d0fd	MZ131558.1	91.667	91.667	91.667|91.667	2.14e-06	2.14e-06	2.14e-06|2.14e-06	48	48	48|48	16058	16058	16058|16058	16235	16235	16235|16235	Mammalia	Rodentia	Muridae	Myomyscus	Myomyscus sp. ETH0898
56242	1	b4af4567-2c07-44dc-a47f-4c0149c29e94	MT381941.1	91.837	91.837	91.837|91.837	3e-06	3e-06	3e-06|3e-06	49	49	49|49	5804	5804	5804|5804	16336	16336	16336|16336	Mammalia	Rodentia	Cricetidae	Phenacomys	Phenacomys intermedius
JFD1645
subject.tax.id	Count	query.acc.ver	subject.acc.ver	X..identity	Average.X..identity	X..identity.range	evalue	Average.evalue	evalue.range	alignment.length	Average.alignment.length	alignment.length.range	query.length	Average.query.length	query.length.range	subject.length	Average.subject.length	subject.length.range	class	order	family	genus	species
2964413	12	cafb5926-2f6b-438f-979e-815192a071ea	MZ364435.1	97.091	94.6354	90.433|97.98	0	2.63e-97	0|3.15e-96	550	474.25	198|564	3033	4968.08	951|16611	549	549	549|549	Mammalia	Rodentia	Cricetidae	Akodon	Akodon sp. IAvH-CT-06096
2964413	12	c27181ec-271f-4cc2-b945-17181e74f059	MZ364435.1	96.926	94.6354	90.433|97.98	0	2.63e-97	0|3.15e-96	553	474.25	198|564	9496	4968.08	951|16611	549	549	549|549	Mammalia	Rodentia	Cricetidae	Akodon	Akodon sp. IAvH-CT-06096
2964413	12	dec952e4-1d36-4c00-8e67-2929a0426f35	MZ364435.1	96.89	94.6354	90.433|97.98	0	2.63e-97	0|3.15e-96	418	474.25	198|564	6318	4968.08	951|16611	549	549	549|549	Mammalia	Rodentia	Cricetidae	Akodon	Akodon sp. IAvH-CT-06096
2964413	12	c77b931b-a786-43c6-bfa9-838eb2f2e7df	MZ364435.1	96.383	94.6354	90.433|97.98	0	2.63e-97	0|3.15e-96	553	474.25	198|564	3982	4968.08	951|16611	549	549	549|549	Mammalia	Rodentia	Cricetidae	Akodon	Akodon sp. IAvH-CT-06096
230186	11	eb509d62-43e9-47c0-a16d-8aa150808874	MK419958.1	95.841	94.6939	90.765|98.266	0	3.35e-84	0|2.26e-83	529	486.182	173|1160	1210	2759.18	264|11999	801	955.091	801|1140	Mammalia	Rodentia	Cricetidae	Akodon	Akodon affinis
230186	11	4437a05f-fc3b-45f9-b66b-68f0cef77084	AY196164.1	95.222	94.6939	90.765|98.266	0	3.35e-84	0|2.26e-83	1151	486.182	173|1160	4832	2759.18	264|11999	1140	955.091	801|1140	Mammalia	Rodentia	Cricetidae	Akodon	Akodon affinis
2964413	12	f5496980-c3e3-4ce9-9bb5-8a4ea9ddd216	MZ364435.1	94.698	94.6354	90.433|97.98	0	2.63e-97	0|3.15e-96	547	474.25	198|564	16611	4968.08	951|16611	549	549	549|549	Mammalia	Rodentia	Cricetidae	Akodon	Akodon sp. IAvH-CT-06096
2964413	12	34cd01cd-e388-453e-ab42-4dbafc249522	MZ364435.1	93.794	94.6354	90.433|97.98	0	2.63e-97	0|3.15e-96	564	474.25	198|564	5477	4968.08	951|16611	549	549	549|549	Mammalia	Rodentia	Cricetidae	Akodon	Akodon sp. IAvH-CT-06096
484371	7	09d04d73-e44b-4155-a913-ae15abcab5df	MW009983.1	93.25	92.2741	90.029|94.318	0	6.07e-15	0|4.25e-14	637	472.429	62|692	1973	1961.43	485|3923	655	672.143	655|679	Mammalia	Rodentia	Cricetidae	Akodon	Akodon simulator
230186	11	167b7f7d-1f63-46f6-b4ca-b6ef6ed32724	AY196164.1	92.759	94.6939	90.765|98.266	0	3.35e-84	0|2.26e-83	1160	486.182	173|1160	11999	2759.18	264|11999	1140	955.091	801|1140	Mammalia	Rodentia	Cricetidae	Akodon	Akodon affinis
484371	7	023fc1ee-8908-4d14-b848-72bad37440af	MW009985.1	92.625	92.2741	90.029|94.318	0	6.07e-15	0|4.25e-14	678	472.429	62|692	1124	1961.43	485|3923	679	672.143	655|679	Mammalia	Rodentia	Cricetidae	Akodon	Akodon simulator
140765	3	9b211f7f-c4cc-4b5c-9b3d-10e56e8c7de5	AF296261.1	92.407	94.2447	92.179|98.148	0	6.1e-20	0|1.83e-19	540	377	54|540	2747	1616.33	912|2747	1323	1323	1323|1323	Mammalia	Rodentia	Cricetidae	Akodon	Akodon baliolus
106112	15	f2f3fe07-c976-4d20-8b00-925e4c3ae293	KF769456.1	92.401	91.7453	90.08|93.897	0	8.73e-54	0|1.31e-52	908	767	177|5222	1645	1872.47	213|7803	16378	16378	16378|16378	Mammalia	Rodentia	Cricetidae	Akodon	Akodon montensis
106112	15	525f0ec1-33cc-4f71-aa0a-9842511c12f9	KF769456.1	92.397	91.7453	90.08|93.897	0	8.73e-54	0|1.31e-52	776	767	177|5222	5381	1872.47	213|7803	16378	16378	16378|16378	Mammalia	Rodentia	Cricetidae	Akodon	Akodon montensis
106112	15	96aca927-c3b6-4af5-8bdf-baa17d855eeb	KF769456.1	92.199	91.7453	90.08|93.897	0	8.73e-54	0|1.31e-52	846	767	177|5222	1731	1872.47	213|7803	16378	16378	16378|16378	Mammalia	Rodentia	Cricetidae	Akodon	Akodon montensis
140765	3	ea86e88d-dc64-4c6a-8f47-e11e1a219c6d	AF296261.1	92.179	94.2447	92.179|98.148	0	6.1e-20	0|1.83e-19	537	377	54|540	1190	1616.33	912|2747	1323	1323	1323|1323	Mammalia	Rodentia	Cricetidae	Akodon	Akodon baliolus
2964413	12	3cab6675-1372-45fa-9e38-4f542f0aaadb	MZ364435.1	91.771	94.6354	90.433|97.98	0	2.63e-97	0|3.15e-96	559	474.25	198|564	8506	4968.08	951|16611	549	549	549|549	Mammalia	Rodentia	Cricetidae	Akodon	Akodon sp. IAvH-CT-06096
10078	3	9b1862f0-861a-43e2-9297-3ac24058507e	AF296276.1	91.216	91.8663	91.216|92.88	0	1.22e-48	0|3.66e-48	740	400.667	153|740	1111	2520	360|6089	1258	1258	1258|1258	Mammalia	Rodentia	Cricetidae	Akodon	Akodon torques
106112	15	3a27e695-dce7-4c91-8196-3887e1cd1bb2	KF769456.1	91.196	91.7453	90.08|93.897	0	8.73e-54	0|1.31e-52	1045	767	177|5222	1432	1872.47	213|7803	16378	16378	16378|16378	Mammalia	Rodentia	Cricetidae	Akodon	Akodon montensis
2964413	12	42a6dd10-8225-4b32-81e3-cffc9384a4ec	MZ364435.1	91.103	94.6354	90.433|97.98	0	2.63e-97	0|3.15e-96	562	474.25	198|564	1682	4968.08	951|16611	549	549	549|549	Mammalia	Rodentia	Cricetidae	Akodon	Akodon sp. IAvH-CT-06096
10070	4	9f666712-f414-461d-a7fa-0228e29d1594	KC841346.1	91.086	92.814	90.337|95.833	0	1.02e-24	0|4.07e-24	1133	670.75	72|1133	5278	3181.25	1074|5278	1140	1215.5	1140|1291	Mammalia	Rodentia	Cricetidae	Akodon	Akodon aerosus
230186	11	4d141d6c-7104-485c-a342-a3a220f2e32a	AY196164.1	90.765	94.6939	90.765|98.266	0	3.35e-84	0|2.26e-83	758	486.182	173|1160	6560	2759.18	264|11999	1140	955.091	801|1140	Mammalia	Rodentia	Cricetidae	Akodon	Akodon affinis
2964413	12	5fabf6b7-e78b-4e75-bfa8-c762e1eb8180	MZ364435.1	90.433	94.6354	90.433|97.98	0	2.63e-97	0|3.15e-96	554	474.25	198|564	1106	4968.08	951|16611	549	549	549|549	Mammalia	Rodentia	Cricetidae	Akodon	Akodon sp. IAvH-CT-06096
10070	4	455b2de9-3eb8-44c2-9d40-2c002f35f106	KC841346.1	90.337	92.814	90.337|95.833	0	1.02e-24	0|4.07e-24	1128	670.75	72|1133	4373	3181.25	1074|5278	1140	1215.5	1140|1291	Mammalia	Rodentia	Cricetidae	Akodon	Akodon aerosus
484371	7	56bb0c0a-caa0-4be0-9655-a3488a26dc5e	MW009983.1	90.139	92.2741	90.029|94.318	0	6.07e-15	0|4.25e-14	649	472.429	62|692	2443	1961.43	485|3923	655	672.143	655|679	Mammalia	Rodentia	Cricetidae	Akodon	Akodon simulator
106112	15	f1d90cc8-7191-427b-bc55-b57de56eca1c	KF769456.1	90.08	91.7453	90.08|93.897	0	8.73e-54	0|1.31e-52	5222	767	177|5222	7056	1872.47	213|7803	16378	16378	16378|16378	Mammalia	Rodentia	Cricetidae	Akodon	Akodon montensis
484371	7	3771c28e-807c-45db-8a39-6d987d2edc00	MW009985.1	90.029	92.2741	90.029|94.318	0	6.07e-15	0|4.25e-14	692	472.429	62|692	2494	1961.43	485|3923	679	672.143	655|679	Mammalia	Rodentia	Cricetidae	Akodon	Akodon simulator
140762	3	6ff62eb7-c923-4b78-abca-c2233d0f2bb1	AF296278.1	90	91.419	90|93.642	0	2.95e-63	0|8.86e-63	600	360.667	173|600	795	1217.67	637|2221	1251	1251	1251|1251	Mammalia	Rodentia	Cricetidae	Akodon	Akodon varius
106112	15	1f4e40b7-624b-44a3-97d2-e72abebd4306	KF769456.1	93.197	91.7453	90.08|93.897	1.51e-168	8.73e-54	0|1.31e-52	441	767	177|5222	7803	1872.47	213|7803	16378	16378	16378|16378	Mammalia	Rodentia	Cricetidae	Akodon	Akodon montensis
106112	15	b55b8bb2-8860-4944-ae78-2158df627383	KF769456.1	90.144	91.7453	90.08|93.897	2.3e-154	8.73e-54	0|1.31e-52	487	767	177|5222	537	1872.47	213|7803	16378	16378	16378|16378	Mammalia	Rodentia	Cricetidae	Akodon	Akodon montensis
2964413	12	29dbc163-cf74-4845-90f7-75bcf96e864c	MZ364435.1	96.273	94.6354	90.433|97.98	6.36e-150	2.63e-97	0|3.15e-96	322	474.25	198|564	1073	4968.08	951|16611	549	549	549|549	Mammalia	Rodentia	Cricetidae	Akodon	Akodon sp. IAvH-CT-06096
56217	3	0e04f7bb-f4d4-48fd-8f5e-00a54597ab5b	U83813.1	90.177	91.4603	90.177|92.537	9.94e-149	1.11e-40	9.94e-149|3.33e-40	509	266.333	134|509	1105	915.667	781|1105	1326	1326	1326|1326	Mammalia	Rodentia	Cricetidae	Necromys	Necromys lactens
484371	7	374e3ecd-4bcf-49e1-8fb6-e873aa677c47	MW009985.1	92.01	92.2741	90.029|94.318	2.4e-143	6.07e-15	0|4.25e-14	413	472.429	62|692	1288	1961.43	485|3923	679	672.143	655|679	Mammalia	Rodentia	Cricetidae	Akodon	Akodon simulator
230186	11	3e38ba7c-0b8a-4756-b781-4fbdf8238c7f	AY196164.1	98.168	94.6939	90.765|98.266	1.51e-137	3.35e-84	0|2.26e-83	273	486.182	173|1160	272	2759.18	264|11999	1140	955.091	801|1140	Mammalia	Rodentia	Cricetidae	Akodon	Akodon affinis
230186	11	be7d9786-1bfb-45f9-868e-53ba1fb62f32	MK419958.1	92.978	94.6939	90.765|98.266	3.26e-136	3.35e-84	0|2.26e-83	356	486.182	173|1160	379	2759.18	264|11999	801	955.091	801|1140	Mammalia	Rodentia	Cricetidae	Akodon	Akodon affinis
10070	4	c2c0f2dc-bab5-4fa0-ae2b-edc5dad36667	AF296258.1	94	92.814	90.337|95.833	4.59e-136	1.02e-24	0|4.07e-24	350	670.75	72|1133	2000	3181.25	1074|5278	1291	1215.5	1140|1291	Mammalia	Rodentia	Cricetidae	Akodon	Akodon aerosus
2964413	12	7489ac1f-3816-4a95-bd6f-57799c617028	MZ364435.1	92.283	94.6354	90.433|97.98	2.26e-114	2.63e-97	0|3.15e-96	311	474.25	198|564	1382	4968.08	951|16611	549	549	549|549	Mammalia	Rodentia	Cricetidae	Akodon	Akodon sp. IAvH-CT-06096
251311	3	7691d4ba-c751-4913-9f01-0db4f5e14e7c	MW009981.1	93.75	92.9717	92.308|93.75	1.61e-113	1.25e-80	1.61e-113|2.92e-80	304	258.333	224|304	2519	2352.67	269|4270	679	679	679|679	Mammalia	Rodentia	Cricetidae	Akodon	Akodon albiventer
10078	3	907b62ae-a994-47b0-b40a-98dead6fbb51	AF296276.1	92.88	91.8663	91.216|92.88	3e-110	1.22e-48	0|3.66e-48	309	400.667	153|740	360	2520	360|6089	1258	1258	1258|1258	Mammalia	Rodentia	Cricetidae	Akodon	Akodon torques
230186	11	23791cb0-e7bf-4841-945d-265074c37ea6	MK419958.1	95.635	94.6939	90.765|98.266	9.23e-110	3.35e-84	0|2.26e-83	252	486.182	173|1160	288	2759.18	264|11999	801	955.091	801|1140	Mammalia	Rodentia	Cricetidae	Akodon	Akodon affinis
106112	15	cde8f25f-9ec6-47ef-8978-bde75fcde3dc	KF769456.1	90.113	91.7453	90.08|93.897	6.59e-105	8.73e-54	0|1.31e-52	354	767	177|5222	381	1872.47	213|7803	16378	16378	16378|16378	Mammalia	Rodentia	Cricetidae	Akodon	Akodon montensis
230186	11	42baa8f1-8769-4063-bf71-11070069c1d4	AY196164.1	94	94.6939	90.765|98.266	2.08e-98	3.35e-84	0|2.26e-83	250	486.182	173|1160	1438	2759.18	264|11999	1140	955.091	801|1140	Mammalia	Rodentia	Cricetidae	Akodon	Akodon affinis
10072	2	9dc98c30-c7ed-421e-aa39-4fc8de52ab28	AF296262.1	90.221	90.4885	90.221|90.756	2.7e-97	3.85e-34	2.7e-97|7.7e-34	317	218	119|317	1231	905.5	580|1231	1242	1242	1242|1242	Mammalia	Rodentia	Cricetidae	Akodon	Akodon boliviensis
2964413	12	b3afdd8c-3ff2-42e8-a10a-036e69e9c045	MZ364435.1	97.98	94.6354	90.433|97.98	3.15e-96	2.63e-97	0|3.15e-96	198	474.25	198|564	951	4968.08	951|16611	549	549	549|549	Mammalia	Rodentia	Cricetidae	Akodon	Akodon sp. IAvH-CT-06096
140762	3	943f3db5-a30e-4189-89f4-5b9f0f7cf5ed	AF296278.1	90.615	91.419	90|93.642	8.15e-96	2.95e-63	0|8.86e-63	309	360.667	173|600	637	1217.67	637|2221	1251	1251	1251|1251	Mammalia	Rodentia	Cricetidae	Akodon	Akodon varius
364155	1	ea61169a-c010-4411-b79d-faa16366681e	MT492450.1	92.607	92.607	92.607|92.607	1.18e-92	1.18e-92	1.18e-92|1.18e-92	257	257	257|257	1017	1017	1017|1017	16346	16346	16346|16346	Mammalia	Rodentia	Cricetidae	Synaptomys	Synaptomys cooperi
230186	11	381ec2af-9f91-4769-82d1-727ec2894f66	MK419958.1	95.327	94.6939	90.765|98.266	2.6e-90	3.35e-84	0|2.26e-83	214	486.182	173|1160	264	2759.18	264|11999	801	955.091	801|1140	Mammalia	Rodentia	Cricetidae	Akodon	Akodon affinis
230186	11	83671a79-fa1d-491b-89a8-e3a2f11937d9	MK419958.1	92.672	94.6939	90.765|98.266	1.43e-83	3.35e-84	0|2.26e-83	232	486.182	173|1160	446	2759.18	264|11999	801	955.091	801|1140	Mammalia	Rodentia	Cricetidae	Akodon	Akodon affinis
230186	11	577099ad-b555-497c-ae4f-f932c09ce8f8	MK419958.1	98.266	94.6939	90.765|98.266	2.26e-83	3.35e-84	0|2.26e-83	173	486.182	173|1160	2663	2759.18	264|11999	801	955.091	801|1140	Mammalia	Rodentia	Cricetidae	Akodon	Akodon affinis
106112	15	61cea901-5a7c-44f1-a376-41a1e9797acf	KF769456.1	93.897	91.7453	90.08|93.897	3.17e-83	8.73e-54	0|1.31e-52	213	767	177|5222	263	1872.47	213|7803	16378	16378	16378|16378	Mammalia	Rodentia	Cricetidae	Akodon	Akodon montensis
251311	3	21e86e94-ceda-4809-b4e7-7eb8f4c9bed8	MW009981.1	92.308	92.9717	92.308|93.75	8.37e-81	1.25e-80	1.61e-113|2.92e-80	247	258.333	224|304	4270	2352.67	269|4270	679	679	679|679	Mammalia	Rodentia	Cricetidae	Akodon	Akodon albiventer
251311	3	96ff38cf-ad36-4ced-abad-ddca3ef880a3	MW009981.1	92.857	92.9717	92.308|93.75	2.92e-80	1.25e-80	1.61e-113|2.92e-80	224	258.333	224|304	269	2352.67	269|4270	679	679	679|679	Mammalia	Rodentia	Cricetidae	Akodon	Akodon albiventer
106112	15	b6d9b5c8-d88c-46dd-b45e-a4c178539b1a	KF769456.1	91.525	91.7453	90.08|93.897	5.12e-79	8.73e-54	0|1.31e-52	236	767	177|5222	308	1872.47	213|7803	16378	16378	16378|16378	Mammalia	Rodentia	Cricetidae	Akodon	Akodon montensis
89098	2	f56e8f8b-81bd-4290-8b8a-daa0b2894bcd	OL685394.1	90.196	90.4315	90.196|90.667	2.75e-78	2.98e-16	2.75e-78|5.96e-16	255	165	75|255	1571	1210.5	850|1571	16358	16358	16358|16358	Mammalia	Rodentia	Cricetidae	Holochilus	Holochilus sciureus
106112	15	786a25dc-e0b8-4c09-894d-c23698f27696	KF769456.1	92.823	91.7453	90.08|93.897	1.94e-71	8.73e-54	0|1.31e-52	209	767	177|5222	249	1872.47	213|7803	16378	16378	16378|16378	Mammalia	Rodentia	Cricetidae	Akodon	Akodon montensis
106112	15	e6861117-8131-4708-acd1-a68ed02af78f	KF769456.1	92.04	91.7453	90.08|93.897	4.06e-66	8.73e-54	0|1.31e-52	201	767	177|5222	251	1872.47	213|7803	16378	16378	16378|16378	Mammalia	Rodentia	Cricetidae	Akodon	Akodon montensis
484371	7	f395f457-d303-4801-8ffa-c1e134803ced	MW009985.1	94.318	92.2741	90.029|94.318	8.15e-66	6.07e-15	0|4.25e-14	176	472.429	62|692	485	1961.43	485|3923	679	672.143	655|679	Mammalia	Rodentia	Cricetidae	Akodon	Akodon simulator
106112	15	7953ed81-ca8f-492f-adb9-f1a36d29b3fe	KF769456.1	90.821	91.7453	90.08|93.897	3.69e-63	8.73e-54	0|1.31e-52	207	767	177|5222	254	1872.47	213|7803	16378	16378	16378|16378	Mammalia	Rodentia	Cricetidae	Akodon	Akodon montensis
140762	3	e7a86424-e154-410f-b73c-71bd93a3e35f	AF296278.1	93.642	91.419	90|93.642	8.86e-63	2.95e-63	0|8.86e-63	173	360.667	173|600	2221	1217.67	637|2221	1251	1251	1251|1251	Mammalia	Rodentia	Cricetidae	Akodon	Akodon varius
106112	15	9cd639f6-2735-4b0a-a855-761aca450392	KF769456.1	92.09	91.7453	90.08|93.897	2.04e-60	8.73e-54	0|1.31e-52	177	767	177|5222	583	1872.47	213|7803	16378	16378	16378|16378	Mammalia	Rodentia	Cricetidae	Akodon	Akodon montensis
10076	1	50c32a99-a52c-49f5-8fd2-2296120f5a49	AF296273.1	90.244	90.244	90.244|90.244	4.89e-60	4.89e-60	4.89e-60|4.89e-60	205	205	205|205	366	366	366|366	1241	1241	1241|1241	Mammalia	Rodentia	Cricetidae	Akodon	Akodon lutescens
2048992	1	714dd252-3a2d-428d-a32b-88fd71954aa7	ON165296.1	90.64	90.64	90.64|90.64	1.46e-55	1.46e-55	1.46e-55|1.46e-55	203	203	203|203	777	777	777|777	16341	16341	16341|16341	Mammalia	Rodentia	Cricetidae	Eothenomys	Eothenomys shimianensis
907928	1	e785f9fa-96cf-4bc6-a940-e26236b7ce9d	KY117564.1	91.071	91.071	91.071|91.071	8.57e-53	8.57e-53	8.57e-53|8.57e-53	168	168	168|168	1958	1958	1958|1958	16200	16200	16200|16200	Mammalia	Rodentia	Muridae	Maxomys	Maxomys rajah
106112	15	b5f98f6f-9438-4c9d-83e0-c305027ebc94	KF769456.1	91.257	91.7453	90.08|93.897	1.31e-52	8.73e-54	0|1.31e-52	183	767	177|5222	213	1872.47	213|7803	16378	16378	16378|16378	Mammalia	Rodentia	Cricetidae	Akodon	Akodon montensis
10078	3	2e4f1469-6b11-43cc-a719-4c6e2dc14b55	AF296276.1	91.503	91.8663	91.216|92.88	3.66e-48	1.22e-48	0|3.66e-48	153	400.667	153|740	6089	2520	360|6089	1258	1258	1258|1258	Mammalia	Rodentia	Cricetidae	Akodon	Akodon torques
56217	3	78234ad7-057d-41ac-894a-9bca21b0cd4a	U83813.1	91.667	91.4603	90.177|92.537	1.05e-43	1.11e-40	9.94e-149|3.33e-40	156	266.333	134|509	861	915.667	781|1105	1326	1326	1326|1326	Mammalia	Rodentia	Cricetidae	Necromys	Necromys lactens
61159	1	d672d240-aae0-486b-8707-876ae7dff5b0	MN807583.1	92.969	92.969	92.969|92.969	3.69e-41	3.69e-41	3.69e-41|3.69e-41	128	128	128|128	348	348	348|348	16276	16276	16276|16276	Mammalia	Rodentia	Muridae	Lemniscomys	Lemniscomys bellieri
56217	3	63910f96-358b-4d15-84de-925e584850fe	U83813.1	92.537	91.4603	90.177|92.537	3.33e-40	1.11e-40	9.94e-149|3.33e-40	134	266.333	134|509	781	915.667	781|1105	1326	1326	1326|1326	Mammalia	Rodentia	Cricetidae	Necromys	Necromys lactens
10072	2	6f573672-6fa8-4c42-ba7d-e9e41a42e4ca	AF296262.1	90.756	90.4885	90.221|90.756	7.7e-34	3.85e-34	2.7e-97|7.7e-34	119	218	119|317	580	905.5	580|1231	1242	1242	1242|1242	Mammalia	Rodentia	Cricetidae	Akodon	Akodon boliviensis
105199	2	b20886df-0fbd-46e0-abc3-8ba3f941ade6	NC_033356.1	90.226	92.5705	90.226|94.915	8.11e-34	4.81e-17	8.11e-34|9.62e-17	133	96	59|133	610	1332.5	610|2055	16294	16294	16294|16294	Mammalia	Rodentia	Cricetidae	Neotoma	Neotoma fuscipes
537921	1	eafd8efe-156b-4307-aa7c-5c0f4d017097	MT381940.1	91.453	91.453	91.453|91.453	2.17e-33	2.17e-33	2.17e-33|2.17e-33	117	117	117|117	425	425	425|425	16350	16350	16350|16350	Mammalia	Rodentia	Cricetidae	Myodes	Myodes centralis
577681	2	5422ed9a-418e-47a0-8c99-055f38054dc8	ON165328.1	93.878	93.418	92.958|93.878	1.63e-30	4.65e-21	1.63e-30|9.29e-21	98	84.5	71|98	359	276.5	194|359	16415	16415	16415|16415	Mammalia	Rodentia	Cricetidae	Eothenomys	Eothenomys chinensis
10122	1	766e7151-6284-4717-acbe-2b506baac0cd	NC_014864.1	94.505	94.505	94.505|94.505	1.74e-30	1.74e-30	1.74e-30|1.74e-30	91	91	91|91	1437	1437	1437|1437	16303	16303	16303|16303	Mammalia	Rodentia	Muridae	Rattus	Rattus villosissimus
492276	1	4c58373f-7315-4baf-97c0-fc2e21289143	EU192185.1	97.333	97.333	97.333|97.333	1.58e-28	1.58e-28	1.58e-28|1.58e-28	75	75	75|75	576	576	576|576	952	952	952|952	Mammalia	Rodentia	Cricetidae	Oligoryzomys	Oligoryzomys sp. B MUSA2625
269658	1	40bdd063-dec4-45ad-a359-084dec0094c9	MT381932.1	91.589	91.589	91.589|91.589	1.24e-27	1.24e-27	1.24e-27|1.24e-27	107	107	107|107	1141	1141	1141|1141	16339	16339	16339|16339	Mammalia	Rodentia	Cricetidae	Microtus	Microtus socialis
10029	1	eb8740a6-0273-4481-8318-0301b3a958f4	KX576660.1	92.079	92.079	92.079|92.079	1.68e-27	1.68e-27	1.68e-27|1.68e-27	101	101	101|101	1544	1544	1544|1544	16283	16283	16283|16283	Mammalia	Rodentia	Cricetidae	Cricetulus	Cricetulus griseus
442578	1	0deef24c-0558-486a-875c-4a54100b9bf8	EU349714.1	91.919	91.919	91.919|91.919	3.07e-27	3.07e-27	3.07e-27|3.07e-27	99	99	99|99	732	732	732|732	1328	1328	1328|1328	Mammalia	Rodentia	Muridae	Macruromys	Macruromys major
329620	1	9860497f-0c6c-478e-92b6-48532be3be6b	NC_054160.1	91.262	91.262	91.262|91.262	2.03e-26	2.03e-26	2.03e-26|2.03e-26	103	103	103|103	1233	1233	1233|1233	16367	16367	16367|16367	Mammalia	Rodentia	Cricetidae	Ellobius	Ellobius talpinus
2613867	1	0d4f7f50-a62e-41f6-b9e8-c51d2b6fda23	ON165308.1	95.89	95.89	95.89|95.89	2.67e-26	2.67e-26	2.67e-26|2.67e-26	73	73	73|73	427	427	427|427	16333	16333	16333|16333	Mammalia	Rodentia	Cricetidae	Neodon	Neodon medogensis
109678	1	7678e8c7-82a1-4627-a892-6b6ce7cac08b	KU885975.1	90.09	90.09	90.09|90.09	1.33e-24	1.33e-24	1.33e-24|1.33e-24	111	111	111|111	1356	1356	1356|1356	16273	16273	16273|16273	Mammalia	Rodentia	Cricetidae	Phodopus	Phodopus roborovskii
10070	4	c28827b0-65db-4c16-b6e9-efd9e1a4cf57	AF296258.1	95.833	92.814	90.337|95.833	4.07e-24	1.02e-24	0|4.07e-24	72	670.75	72|1133	1074	3181.25	1074|5278	1291	1215.5	1140|1291	Mammalia	Rodentia	Cricetidae	Akodon	Akodon aerosus
397749	2	44c9220d-cc8e-4581-a3b3-fd53736204b7	KY707304.1	90.805	93.7075	90.805|96.61	4.42e-23	8.05e-20	4.42e-23|1.61e-19	87	73	59|87	771	495	219|771	16515	16515	16515|16515	Mammalia	Rodentia	Cricetidae	Habromys	Habromys ixtlani
209873	1	83f75e75-deec-4ee0-be8d-8010c311b465	MZ131570.1	97.015	97.015	97.015|97.015	5.1e-23	5.1e-23	5.1e-23|5.1e-23	67	67	67|67	3412	3412	3412|3412	16245	16245	16245|16245	Mammalia	Rodentia	Muridae	Zelotomys	Zelotomys hildegardeae
2749091	1	815eaf37-6c0e-4cb9-b08a-a531b041f76d	MT174523.1	92.135	92.135	92.135|92.135	6.31e-23	6.31e-23	6.31e-23|6.31e-23	89	89	89|89	295	295	295|295	16513	16513	16513|16513	Mammalia	Rodentia	Sciuridae	Guerlinguetus	Guerlinguetus brasiliensis
1477902	1	cf244c78-dc58-4cfb-84f2-c10617e03176	MT381924.1	92.135	92.135	92.135|92.135	1.11e-21	1.11e-21	1.11e-21|1.11e-21	89	89	89|89	1271	1271	1271|1271	16403	16403	16403|16403	Mammalia	Rodentia	Cricetidae	Alticola	Alticola olchonensis
577681	2	5b671c73-ee00-4356-80fe-cedd1ac58b3d	ON165328.1	92.958	93.418	92.958|93.878	9.29e-21	4.65e-21	1.63e-30|9.29e-21	71	84.5	71|98	194	276.5	194|359	16415	16415	16415|16415	Mammalia	Rodentia	Cricetidae	Eothenomys	Eothenomys chinensis
397749	2	a7b2b432-e235-4f6a-9b95-7d1a6f21075d	KY707304.1	96.61	93.7075	90.805|96.61	1.61e-19	8.05e-20	4.42e-23|1.61e-19	59	73	59|87	219	495	219|771	16515	16515	16515|16515	Mammalia	Rodentia	Cricetidae	Habromys	Habromys ixtlani
140765	3	c4a6caae-b53a-4f8d-9890-647d758e551d	AF296261.1	98.148	94.2447	92.179|98.148	1.83e-19	6.1e-20	0|1.83e-19	54	377	54|540	912	1616.33	912|2747	1323	1323	1323|1323	Mammalia	Rodentia	Cricetidae	Akodon	Akodon baliolus
269650	1	2dcd6e80-7a09-42de-b66f-5f2c513eba97	OK323270.1	92.683	92.683	92.683|92.683	1.84e-19	1.84e-19	1.84e-19|1.84e-19	82	82	82|82	13675	13675	13675|13675	16300	16300	16300|16300	Mammalia	Rodentia	Cricetidae	Chionomys	Chionomys roberti
79684	1	c3a20617-ab7c-42a5-8d83-bd24ed1e54bd	KT166982.1	94.118	94.118	94.118|94.118	9.98e-19	9.98e-19	9.98e-19|9.98e-19	68	68	68|68	339	339	339|339	16292	16292	16292|16292	Mammalia	Rodentia	Cricetidae	Microtus	Microtus ochrogaster
2107264	1	c9327e9f-57d5-44c7-8913-25f29e5466cc	MG701900.1	92.537	92.537	92.537|92.537	1.54e-17	1.54e-17	1.54e-17|1.54e-17	67	67	67|67	345	345	345|345	1177	1177	1177|1177	Mammalia	Rodentia	Muridae	Hybomys	Hybomys trivirgatus
105199	2	a50cbef5-50a2-4f69-bdc8-4671dd509e7f	NC_033356.1	94.915	92.5705	90.226|94.915	9.62e-17	4.81e-17	8.11e-34|9.62e-17	59	96	59|133	2055	1332.5	610|2055	16294	16294	16294|16294	Mammalia	Rodentia	Cricetidae	Neotoma	Neotoma fuscipes
946209	1	fba20707-e8d2-43b3-993f-fc538a3d25d2	MW193735.1	93.548	93.548	93.548|93.548	5.64e-16	5.64e-16	5.64e-16|5.64e-16	62	62	62|62	805	805	805|805	16334	16334	16334|16334	Mammalia	Rodentia	Muridae	Niviventer	Niviventer tenaster
89098	2	2a1747d5-4dcb-4312-8b14-e89efdc5b16f	OL685394.1	90.667	90.4315	90.196|90.667	5.96e-16	2.98e-16	2.75e-78|5.96e-16	75	165	75|255	850	1210.5	850|1571	16358	16358	16358|16358	Mammalia	Rodentia	Cricetidae	Holochilus	Holochilus sciureus
79921	1	6b43d275-ebba-4fb4-a9c8-c547a5baac2f	AF079399.1	92.308	92.308	92.308|92.308	2.62e-15	2.62e-15	2.62e-15|2.62e-15	65	65	65|65	259	259	259|259	348	348	348|348	Mammalia	Rodentia	Cricetidae	Holochilus	Holochilus vulpinus
2494722	1	4b3d49a2-c612-4226-835a-3e7525c36dc3	MZ353589.1	92.063	92.063	92.063|92.063	3.05e-14	3.05e-14	3.05e-14|3.05e-14	63	63	63|63	2823	2823	2823|2823	16277	16277	16277|16277	Mammalia	Rodentia	Muridae	Lophuromys	Lophuromys simensis
484371	7	89dbe4f6-0208-4a6b-ac44-d461e710b122	MW009984.1	93.548	92.2741	90.029|94.318	4.25e-14	6.07e-15	0|4.25e-14	62	472.429	62|692	3923	1961.43	485|3923	679	672.143	655|679	Mammalia	Rodentia	Cricetidae	Akodon	Akodon simulator
2749094	1	0f0aad86-e557-4ede-b6e8-539fefef617e	MT259123.1	94.34	94.34	94.34|94.34	1.42e-13	1.42e-13	1.42e-13|1.42e-13	53	53	53|53	878	878	878|878	16524	16524	16524|16524	Mammalia	Rodentia	Sciuridae	Microsciurus	Microsciurus sabanillae
485437	1	d4ca5c48-8bc3-427c-b306-9721c3d81023	MZ131557.1	93.333	93.333	93.333|93.333	2.92e-13	2.92e-13	2.92e-13|2.92e-13	60	60	60|60	1785	1785	1785|1785	16227	16227	16227|16227	Mammalia	Rodentia	Muridae	Ochromyscus	Ochromyscus brockmani
121587	1	87180a51-a2f4-4509-a3cc-2a415dfeaa20	NC_053805.1	95.833	95.833	95.833|95.833	8.24e-13	8.24e-13	8.24e-13|8.24e-13	48	48	48|48	1299	1299	1299|1299	16264	16264	16264|16264	Mammalia	Rodentia	Muridae	Desmomys	Desmomys harringtoni
1449541	1	1afce3a2-0b02-43e6-b593-1f1c3dc2b148	OM809882.1	91.935	91.935	91.935|91.935	2.14e-12	2.14e-12	2.14e-12|2.14e-12	62	62	62|62	236	236	236|236	16285	16285	16285|16285	Mammalia	Rodentia	Cricetidae	Lasiopodomys	Lasiopodomys gregalis
230112	1	a4b058d3-a2f5-460b-be84-a84bca1a4f09	EF621305.1	91.935	91.935	91.935|91.935	2.99e-12	2.99e-12	2.99e-12|2.99e-12	62	62	62|62	1212	1212	1212|1212	801	801	801|801	Mammalia	Rodentia	Cricetidae	Akodon	Akodon reigi
259052	1	6f4f2915-86bd-4f42-ac74-d541ac71d4fd	ON165343.1	91.489	91.489	91.489|91.489	8.44e-06	8.44e-06	8.44e-06|8.44e-06	47	47	47|47	1090	1090	1090|1090	16352	16352	16352|16352	Mammalia	Rodentia	Cricetidae	Eothenomys	Eothenomys proditor
JFD1646
subject.tax.id	Count	query.acc.ver	subject.acc.ver	X..identity	Average.X..identity	X..identity.range	evalue	Average.evalue	evalue.range	alignment.length	Average.alignment.length	alignment.length.range	query.length	Average.query.length	query.length.range	subject.length	Average.subject.length	subject.length.range	class	order	family	genus	species
1734923	7	23c4b03f-d6cc-4d04-8cfc-39267b9616f2	KP778515.1	92.284	92.1144	90.354|94.656	9.17e-120	1.36286e-50	9.17e-120|9.54e-50	324	290.429	131|334	1165	870.286	635|1165	613	613	613|613	Mammalia	Rodentia	Cricetidae	Handleyomys	Handleyomys rhabdops
1734923	7	0d231514-8afd-454f-af2f-e4e872c9d2d3	KP778515.1	91.867	92.1144	90.354|94.656	2.99e-118	1.36286e-50	9.17e-120|9.54e-50	332	290.429	131|334	649	870.286	635|1165	613	613	613|613	Mammalia	Rodentia	Cricetidae	Handleyomys	Handleyomys rhabdops
1734923	7	60839e3e-3343-47cc-ba92-ac8ed2ac2c1d	KP778515.1	91.617	92.1144	90.354|94.656	1.78e-114	1.36286e-50	9.17e-120|9.54e-50	334	290.429	131|334	1096	870.286	635|1165	613	613	613|613	Mammalia	Rodentia	Cricetidae	Handleyomys	Handleyomys rhabdops
1734923	7	c0c02cc2-6cf9-4487-ab1c-1c7fbe2170a7	KP778515.1	92.131	92.1144	90.354|94.656	4.36e-111	1.36286e-50	9.17e-120|9.54e-50	305	290.429	131|334	771	870.286	635|1165	613	613	613|613	Mammalia	Rodentia	Cricetidae	Handleyomys	Handleyomys rhabdops
1734923	7	4880a9e9-7f90-4d57-9e7e-920f449f7617	KP778515.1	91.892	92.1144	90.354|94.656	2.86e-106	1.36286e-50	9.17e-120|9.54e-50	296	290.429	131|334	948	870.286	635|1165	613	613	613|613	Mammalia	Rodentia	Cricetidae	Handleyomys	Handleyomys rhabdops
1734923	7	830d23cd-5c81-47b1-9b6b-848ef7a307b6	KP778515.1	90.354	92.1144	90.354|94.656	3.04e-99	1.36286e-50	9.17e-120|9.54e-50	311	290.429	131|334	828	870.286	635|1165	613	613	613|613	Mammalia	Rodentia	Cricetidae	Handleyomys	Handleyomys rhabdops
56323	1	cfde687d-8891-4e04-a50f-6f7e7cb18ee4	ON528118.1	90.476	90.476	90.476|90.476	2.54e-67	2.54e-67	2.54e-67|2.54e-67	210	210	210|210	238	238	238|238	16441	16441	16441|16441	Mammalia	Rodentia	Cricetidae	Podomys	Podomys floridanus
1734923	7	5e708ef9-33d7-4068-8fd4-264a5c106113	KP778495.1	94.656	92.1144	90.354|94.656	9.54e-50	1.36286e-50	9.17e-120|9.54e-50	131	290.429	131|334	635	870.286	635|1165	613	613	613|613	Mammalia	Rodentia	Cricetidae	Handleyomys	Handleyomys rhabdops
530171	1	e607d0a3-eefd-4540-80ff-d57da62ce51d	KP778471.1	94.69	94.69	94.69|94.69	6.6e-41	6.6e-41	6.6e-41|6.6e-41	113	113	113|113	2317	2317	2317|2317	611	611	611|611	Mammalia	Rodentia	Cricetidae	Handleyomys	Handleyomys alfaroi
89098	1	40c75681-0d57-43b6-a30b-689c783258ac	OL685394.1	90.58	90.58	90.58|90.58	8.56e-38	8.56e-38	8.56e-38|8.56e-38	138	138	138|138	3340	3340	3340|3340	16358	16358	16358|16358	Mammalia	Rodentia	Cricetidae	Holochilus	Holochilus sciureus
218793	2	25c56045-9b8c-4e5e-9e49-e71d48074fca	MH939287.1	93.519	93.056	92.593|93.519	2.19e-33	4.315e-10	2.19e-33|8.63e-10	108	81	54|108	1621	3728	1621|5835	16309	16309	16309|16309	Mammalia	Rodentia	Cricetidae	Melanomys	Melanomys caliginosus
2820807	1	90a6032d-7eb1-47ff-bb74-8c2819408f53	MW401673.1	91.071	91.071	91.071|91.071	2.91e-28	2.91e-28	2.91e-28|2.91e-28	112	112	112|112	282	282	282|282	16341	16341	16341|16341	Mammalia	Rodentia	Cricetidae	Dicrostonyx	Dicrostonyx torquatus
10105	1	4ccb4073-efb5-4ab5-a7d9-e7ebe431fd51	OP764673.1	95.062	95.062	95.062|95.062	2.38e-26	2.38e-26	2.38e-26|2.38e-26	81	81	81|81	383	383	383|383	16303	16303	16303|16303	Mammalia	Rodentia	Muridae	Mus	Mus minutoides
907928	1	c4f54603-b16f-4013-84aa-540796a54651	KY117562.1	92.771	92.771	92.771|92.771	2.15e-23	2.15e-23	2.15e-23|2.15e-23	83	83	83|83	1450	1450	1450|1450	16296	16296	16296|16296	Mammalia	Rodentia	Muridae	Maxomys	Maxomys rajah
530173	1	cb43bd0f-a305-41a4-86aa-b960afde13fd	KP778468.1	91.011	91.011	91.011|91.011	4.91e-20	4.91e-20	4.91e-20|4.91e-20	89	89	89|89	3659	3659	3659|3659	614	614	614|614	Mammalia	Rodentia	Cricetidae	Handleyomys	Handleyomys saturatior
121561	1	3b5548ed-5923-41a2-b3c0-54dc461aeb81	MN807612.1	90	90	90|90	3.66e-19	3.66e-19	3.66e-19|3.66e-19	100	100	100|100	6966	6966	6966|6966	16259	16259	16259|16259	Mammalia	Rodentia	Muridae	Aethomys	Aethomys chrysophilus
69083	1	6bc8600d-7cd8-4763-8b26-100b4a373d18	KY117572.1	91.011	91.011	91.011|91.011	8.81e-19	8.81e-19	8.81e-19|8.81e-19	89	89	89|89	1122	1122	1122|1122	16234	16234	16234|16234	Mammalia	Rodentia	Muridae	Niviventer	Niviventer cremoriventer
1936103	1	ed96188d-31e7-4a0e-b22c-3649c36988a0	KY464175.1	90.476	90.476	90.476|90.476	3.81e-17	3.81e-17	3.81e-17|3.81e-17	84	84	84|84	12270	12270	12270|12270	16295	16295	16295|16295	Mammalia	Rodentia	Muridae	Sundamys	Sundamys infraluteus
209873	1	b30b78c5-29a0-46e8-88bf-9adc27c963ef	MZ131570.1	90.667	90.667	90.667|90.667	9.8e-15	9.8e-15	9.8e-15|9.8e-15	75	75	75|75	13702	13702	13702|13702	16245	16245	16245|16245	Mammalia	Rodentia	Muridae	Zelotomys	Zelotomys hildegardeae
10036	1	44748502-1fc4-42da-874e-c09719cda473	DQ334843.1	100	100	100|100	2.54e-13	2.54e-13	2.54e-13|2.54e-13	40	40	40|40	1555	1555	1555|1555	1036	1036	1036|1036	Mammalia	Rodentia	Cricetidae	Mesocricetus	Mesocricetus auratus
2776654	1	14668b24-9525-48ff-8bb0-b7e0b02c50a4	MT408169.1	97.727	97.727	97.727|97.727	7.12e-12	7.12e-12	7.12e-12|7.12e-12	44	44	44|44	11094	11094	11094|11094	16245	16245	16245|16245	Mammalia	Rodentia	Muridae	Stenocephalemys	Stenocephalemys ruppi
218793	2	a3442d2c-f744-4849-bc47-e1d68a15419f	MH939287.1	92.593	93.056	92.593|93.519	8.63e-10	4.315e-10	2.19e-33|8.63e-10	54	81	54|108	5835	3728	1621|5835	16309	16309	16309|16309	Mammalia	Rodentia	Cricetidae	Melanomys	Melanomys caliginosus
13151	1	f3f4adda-fad0-465d-811c-03c22ba9b32e	MT410898.1	91.837	91.837	91.837|91.837	4.8e-08	4.8e-08	4.8e-08|4.8e-08	49	49	49|49	1421	1421	1421|1421	16241	16241	16241|16241	Mammalia	Rodentia	Muridae	Micromys	Micromys minutus
10096	1	aee6a07e-edd4-4df7-b835-2ff2049d5da8	MW209725.1	92	92	92|92	1.34e-07	1.34e-07	1.34e-07|1.34e-07	50	50	50|50	1026	1026	1026|1026	16302	16302	16302|16302	Mammalia	Rodentia	Muridae	Mus	Mus spretus
83761	1	b603661e-9b21-4dc1-a3e1-bf74704264de	MW209719.1	90.385	90.385	90.385|90.385	3.53e-06	3.53e-06	3.53e-06|3.53e-06	52	52	52|52	1763	1763	1763|1763	16300	16300	16300|16300	Mammalia	Rodentia	Muridae	Sundamys	Sundamys muelleri

## Sheet: Order-level Chiroptera
DC-BLAST results for bats (Chiroptera) order-level analyses.
JFD1578
subject.tax.id	Count	query.acc.ver	subject.acc.ver	X..identity	Average.X..identity	X..identity.range	evalue	Average.evalue	evalue.range	alignment.length	Average.alignment.length	alignment.length.range	query.length	Average.query.length	query.length.range	subject.length	Average.subject.length	subject.length.range	class	order	family	genus	species
124752	8	5a67cf7c-3059-45c0-8938-f34e19f80bdb	MF143480.1	93.286	93.4213	91.741|99.065	0	4.2875e-52	0|3.43e-51	1534	2301.88	107|5906	1538	4623.88	199|9860	17074	13036.2	706|17074	Mammalia	Chiroptera	Vespertilionidae	Myotis	Myotis riparius
124752	8	e83e1a5b-e499-4ae7-947d-df19c563c9f5	JX130515.1	93.201	93.4213	91.741|99.065	0	4.2875e-52	0|3.43e-51	1162	2301.88	107|5906	9007	4623.88	199|9860	1140	13036.2	706|17074	Mammalia	Chiroptera	Vespertilionidae	Myotis	Myotis riparius
124752	8	afe2cf8d-aa7c-4c70-afe4-ee113239fd14	MF143480.1	92.431	93.4213	91.741|99.065	0	4.2875e-52	0|3.43e-51	5906	2301.88	107|5906	8836	4623.88	199|9860	17074	13036.2	706|17074	Mammalia	Chiroptera	Vespertilionidae	Myotis	Myotis riparius
124752	8	b360a7a5-3ee6-4934-823f-530b0e5204ba	MF143480.1	92.249	93.4213	91.741|99.065	0	4.2875e-52	0|3.43e-51	5341	2301.88	107|5906	9860	4623.88	199|9860	17074	13036.2	706|17074	Mammalia	Chiroptera	Vespertilionidae	Myotis	Myotis riparius
159322	3	b2ca98ca-8ebd-4a7b-9233-3198765fc5b9	MF143475.1	92.075	90.785	90.098|92.075	0	2.63667e-80	0|7.91e-80	795	595.667	275|795	1959	1549.33	1246|1959	16810	16810	16810|16810	Mammalia	Chiroptera	Vespertilionidae	Myotis	Myotis albescens
124752	8	f9202bb7-5353-42eb-bd27-9648d1cdce2b	MF143480.1	91.876	93.4213	91.741|99.065	0	4.2875e-52	0|3.43e-51	874	2301.88	107|5906	1487	4623.88	199|9860	17074	13036.2	706|17074	Mammalia	Chiroptera	Vespertilionidae	Myotis	Myotis riparius
124752	8	c6783c02-2ca5-47db-a1a9-d5e937e08ce1	MF143480.1	91.741	93.4213	91.741|99.065	0	4.2875e-52	0|3.43e-51	3136	2301.88	107|5906	5670	4623.88	199|9860	17074	13036.2	706|17074	Mammalia	Chiroptera	Vespertilionidae	Myotis	Myotis riparius
159322	3	40ce3caf-9cbd-4116-a77c-6ec3f0cb2f77	MF143475.1	90.098	90.785	90.098|92.075	0	2.63667e-80	0|7.91e-80	717	595.667	275|795	1246	1549.33	1246|1959	16810	16810	16810|16810	Mammalia	Chiroptera	Vespertilionidae	Myotis	Myotis albescens
124752	8	ed704ee9-04bc-4e91-8ba1-c4b384c260a7	MF143480.1	93.521	93.4213	91.741|99.065	3.05e-141	4.2875e-52	0|3.43e-51	355	2301.88	107|5906	394	4623.88	199|9860	17074	13036.2	706|17074	Mammalia	Chiroptera	Vespertilionidae	Myotis	Myotis riparius
159322	3	c8c154e4-3894-426e-937a-1063040a9356	MF143475.1	90.182	90.785	90.098|92.075	7.91e-80	2.63667e-80	0|7.91e-80	275	595.667	275|795	1443	1549.33	1246|1959	16810	16810	16810|16810	Mammalia	Chiroptera	Vespertilionidae	Myotis	Myotis albescens
124752	8	21212359-ce9a-4b6b-91e9-373ad89a5e42	MW089486.1	99.065	93.4213	91.741|99.065	3.43e-51	4.2875e-52	0|3.43e-51	107	2301.88	107|5906	199	4623.88	199|9860	706	13036.2	706|17074	Mammalia	Chiroptera	Vespertilionidae	Myotis	Myotis riparius
169756	1	9c64b8ef-de57-4103-b1f6-229f1ea08c82	AF406806.1	92.063	92.063	92.063|92.063	2.64e-12	2.64e-12	2.64e-12|2.64e-12	63	63	63|63	8657	8657	8657|8657	16851	16851	16851|16851	Mammalia	Chiroptera	Rhinolophidae	Rhinolophus	Rhinolophus monoceros
JFD1579
subject.tax.id	Count	query.acc.ver	subject.acc.ver	X..identity	Average.X..identity	X..identity.range	evalue	Average.evalue	evalue.range	alignment.length	Average.alignment.length	alignment.length.range	query.length	Average.query.length	query.length.range	subject.length	Average.subject.length	subject.length.range	class	order	family	genus	species
258919	8	db317b25-53f2-4d4a-9eef-c2b914c011f7	OP345311.1	91.812	91.674	90.022|95.482	0	1.4e-17	0|1.12e-16	6778	2235.5	75|6778	6705	3371.75	315|7340	16799	15022.1	2587|16800	Mammalia	Chiroptera	Vespertilionidae	Histiotus	Histiotus macrotus
258919	8	b27f693f-8cc2-44b0-91ff-ed5feba8ce71	OP345336.1	91.535	91.674	90.022|95.482	0	1.4e-17	0|1.12e-16	4111	2235.5	75|6778	4539	3371.75	315|7340	16800	15022.1	2587|16800	Mammalia	Chiroptera	Vespertilionidae	Histiotus	Histiotus macrotus
258919	8	3834b819-195d-4f55-a230-e9b05a207a59	OP345298.1	90.691	91.674	90.022|95.482	0	1.4e-17	0|1.12e-16	666	2235.5	75|6778	688	3371.75	315|7340	16798	15022.1	2587|16800	Mammalia	Chiroptera	Vespertilionidae	Histiotus	Histiotus macrotus
258919	8	417dbeab-0cfd-40da-8d1f-a2ebe07951b6	OP345311.1	90.022	91.674	90.022|95.482	0	1.4e-17	0|1.12e-16	5382	2235.5	75|6778	7340	3371.75	315|7340	16799	15022.1	2587|16800	Mammalia	Chiroptera	Vespertilionidae	Histiotus	Histiotus macrotus
258919	8	dfe0c2ef-a60b-45b3-a213-61d94942b4e7	AY495472.1	95.482	91.674	90.022|95.482	9.93e-151	1.4e-17	0|1.12e-16	332	2235.5	75|6778	363	3371.75	315|7340	2587	15022.1	2587|16800	Mammalia	Chiroptera	Vespertilionidae	Histiotus	Histiotus macrotus
2764696	1	daeb63bb-17ee-438d-8862-d85f3bbe702f	MT113462.1	94.464	94.464	94.464|94.464	1.12e-120	0	1.12e-120|1.12e-120	289	289	289|289	312	312	312|312	980	980	980|980	Mammalia	Chiroptera	Vespertilionidae	Histiotus	Histiotus humboldti
1161940	4	5a2e4e7c-ebcb-4bc6-9269-1d6b4c20a498	OP345313.1	92.982	92.2567	90.625|94.694	1.16e-107	3e-34	1.16e-107|1.2e-33	285	226.5	128|285	326	2054	293|7220	16814	16814	16814|16814	Mammalia	Chiroptera	Vespertilionidae	Histiotus	Histiotus montanus
1161940	4	12bb3124-d63b-4137-9c4d-0533b7be732c	OP345313.1	94.694	92.2567	90.625|94.694	9.78e-99	3e-34	1.16e-107|1.2e-33	245	226.5	128|285	377	2054	293|7220	16814	16814	16814|16814	Mammalia	Chiroptera	Vespertilionidae	Histiotus	Histiotus montanus
258919	8	eea76667-7cc2-4572-8bb9-1c7c641196c4	OP345298.1	90.975	91.674	90.022|95.482	7.98e-86	1.4e-17	0|1.12e-16	277	2235.5	75|6778	315	3371.75	315|7340	16798	15022.1	2587|16800	Mammalia	Chiroptera	Vespertilionidae	Histiotus	Histiotus macrotus
258919	8	ad3d9f56-292d-492c-a743-a1129677b608	OP345335.1	90.875	91.674	90.022|95.482	3.92e-85	1.4e-17	0|1.12e-16	263	2235.5	75|6778	5729	3371.75	315|7340	16798	15022.1	2587|16800	Mammalia	Chiroptera	Vespertilionidae	Histiotus	Histiotus macrotus
1161940	4	ace50fae-2d83-48c0-8af6-552f0463ae51	OP345313.1	90.726	92.2567	90.625|94.694	1.87e-73	3e-34	1.16e-107|1.2e-33	248	226.5	128|285	293	2054	293|7220	16814	16814	16814|16814	Mammalia	Chiroptera	Vespertilionidae	Histiotus	Histiotus montanus
1161940	4	02865be2-c32a-4841-afcb-d7fa3254b4d9	OP345313.1	90.625	92.2567	90.625|94.694	1.2e-33	3e-34	1.16e-107|1.2e-33	128	226.5	128|285	7220	2054	293|7220	16814	16814	16814|16814	Mammalia	Chiroptera	Vespertilionidae	Histiotus	Histiotus montanus
258919	8	f6b2750e-c11e-4a46-8508-63895ba9b5e0	OP345298.1	92	91.674	90.022|95.482	1.12e-16	1.4e-17	0|1.12e-16	75	2235.5	75|6778	1295	3371.75	315|7340	16798	15022.1	2587|16800	Mammalia	Chiroptera	Vespertilionidae	Histiotus	Histiotus macrotus
JFD1644
subject.tax.id	Count	query.acc.ver	subject.acc.ver	X..identity	Average.X..identity	X..identity.range	evalue	Average.evalue	evalue.range	alignment.length	Average.alignment.length	alignment.length.range	query.length	Average.query.length	query.length.range	subject.length	Average.subject.length	subject.length.range	class	order	family	genus	species
192403	1	6e9a3140-0ec1-47fe-af86-c38ee8440b79	JN659613.1	96.358	96.358	96.358|96.358	0	0	0|0	659	659	659|659	1348	1348	1348|1348	654	654	654|654	Mammalia	Chiroptera	Phyllostomidae	Sturnira	Sturnira erythromos
192402	5	08b71c27-82cf-4052-898b-181c151633af	KC753783.1	95.462	95.087	91.684|97.238	0	0	0|2.13e-115	1146	724.8	249|1146	7167	5225.2	288|9515	1140	1120.8	1044|1140	Mammalia	Chiroptera	Phyllostomidae	Sturnira	Sturnira bogotensis
192407	4	ab71427b-6c9c-4edf-b46c-f83c33406bca	AY395845.1	94.682	92.6347	90.019|94.682	0	1.2725e-43	0|5.09e-43	1523	802	130|1523	2822	1664.75	564|2822	2604	2604	2604|2604	Mammalia	Chiroptera	Phyllostomidae	Sturnira	Sturnira magna
192402	5	690a4306-d4c6-4520-831c-1c850cfd4fc3	KC753901.1	94.665	95.087	91.684|97.238	0	0	0|2.13e-115	881	724.8	249|1146	6061	5225.2	288|9515	1044	1120.8	1044|1140	Mammalia	Chiroptera	Phyllostomidae	Sturnira	Sturnira bogotensis
192407	4	8aca45a8-06cc-4895-af89-afa50b9aeb3b	AY395845.1	91.992	92.6347	90.019|94.682	0	1.2725e-43	0|5.09e-43	1024	802	130|1523	1048	1664.75	564|2822	2604	2604	2604|2604	Mammalia	Chiroptera	Phyllostomidae	Sturnira	Sturnira magna
192405	2	c06583c0-f769-4c44-872d-6166ef569f36	NC_065691.1	91.761	92.309	91.761|92.857	0	2.83e-98	0|5.66e-98	886	576	266|886	909	731	553|909	16641	16641	16641|16641	Mammalia	Chiroptera	Phyllostomidae	Sturnira	Sturnira ludovici
192402	5	ca379210-02c1-451c-b978-a12e42c1f66e	KC753783.1	91.684	95.087	91.684|97.238	0	0	0|2.13e-115	986	724.8	249|1146	3095	5225.2	288|9515	1140	1120.8	1044|1140	Mammalia	Chiroptera	Phyllostomidae	Sturnira	Sturnira bogotensis
27661	5	3a83d326-8a68-4b26-aa31-d9d58584678c	HG003314.1	90.78	91.1734	90.347|92.754	0	1.352e-15	0|6.76e-15	3525	899.8	75|3525	16587	3787.6	244|16587	16637	16637	16637|16637	Mammalia	Chiroptera	Phyllostomidae	Sturnira	Sturnira tildae
192402	5	fc1d8e3c-2aed-48fe-93fe-22a2935d2efd	KC753783.1	97.238	95.087	91.684|97.238	7.17e-176	0	0|2.13e-115	362	724.8	249|1146	9515	5225.2	288|9515	1140	1120.8	1044|1140	Mammalia	Chiroptera	Phyllostomidae	Sturnira	Sturnira bogotensis
192407	4	c1951d99-adf7-4023-bdd5-0a20fe0d64c9	AY395845.1	90.019	92.6347	90.019|94.682	5.05e-170	1.2725e-43	0|5.09e-43	531	802	130|1523	564	1664.75	564|2822	2604	2604	2604|2604	Mammalia	Chiroptera	Phyllostomidae	Sturnira	Sturnira magna
27661	5	8e5ed253-04c5-45be-bf59-b6c97114b88d	HG003314.1	90.347	91.1734	90.347|92.754	5.01e-127	1.352e-15	0|6.76e-15	404	899.8	75|3525	430	3787.6	244|16587	16637	16637	16637|16637	Mammalia	Chiroptera	Phyllostomidae	Sturnira	Sturnira tildae
192402	5	6e8c6f71-dc26-4a94-853f-c24b94648d16	KC753783.1	96.386	95.087	91.684|97.238	2.13e-115	0	0|2.13e-115	249	724.8	249|1146	288	5225.2	288|9515	1140	1120.8	1044|1140	Mammalia	Chiroptera	Phyllostomidae	Sturnira	Sturnira bogotensis
192405	2	5e596048-c04a-4296-bac1-ae0c624897ac	NC_065691.1	92.857	92.309	91.761|92.857	5.66e-98	2.83e-98	0|5.66e-98	266	576	266|886	553	731	553|909	16641	16641	16641|16641	Mammalia	Chiroptera	Phyllostomidae	Sturnira	Sturnira ludovici
27661	5	ff476f60-97a6-4cdb-9162-a8034c2620e2	HG003314.1	91.319	91.1734	90.347|92.754	1.12e-91	1.352e-15	0|6.76e-15	288	899.8	75|3525	355	3787.6	244|16587	16637	16637	16637|16637	Mammalia	Chiroptera	Phyllostomidae	Sturnira	Sturnira tildae
94961	1	aac1573f-96a4-4e4b-92c0-2868407d0135	AF263222.1	90.647	90.647	90.647|90.647	1.29e-78	1.29e-78	1.29e-78|1.29e-78	278	278	278|278	6023	6023	6023|6023	2609	2609	2609|2609	Mammalia	Chiroptera	Mystacinidae	Mystacina	Mystacina tuberculata
27661	5	997ae820-476f-4631-96ed-f92986ec8f0a	HG003314.1	92.754	91.1734	90.347|92.754	2.33e-72	1.352e-15	0|6.76e-15	207	899.8	75|3525	244	3787.6	244|16587	16637	16637	16637|16637	Mammalia	Chiroptera	Phyllostomidae	Sturnira	Sturnira tildae
192407	4	4141e23f-99fc-4969-8b21-68fc1e5d466c	AY395845.1	93.846	92.6347	90.019|94.682	5.09e-43	1.2725e-43	0|5.09e-43	130	802	130|1523	2225	1664.75	564|2822	2604	2604	2604|2604	Mammalia	Chiroptera	Phyllostomidae	Sturnira	Sturnira magna
27634	1	03c206ba-8652-42e4-ab18-10740c834854	JN209840.1	95.062	95.062	95.062|95.062	8.55e-27	8.55e-27	8.55e-27|8.55e-27	81	81	81|81	4199	4199	4199|4199	16709	16709	16709|16709	Mammalia	Chiroptera	Phyllostomidae	Artibeus	Artibeus lituratus
27646	1	70365680-0a96-4ff8-ae1f-81d1af0e4346	NC_065679.1	91.304	91.304	91.304|91.304	2.22e-21	2.22e-21	2.22e-21|2.22e-21	92	92	92|92	1365	1365	1365|1365	16690	16690	16690|16690	Mammalia	Chiroptera	Phyllostomidae	Chiroderma	Chiroderma salvini
27661	5	45c1f3e5-19c2-43fa-bb86-7c0170022469	HG003314.1	90.667	91.1734	90.347|92.754	6.76e-15	1.352e-15	0|6.76e-15	75	899.8	75|3525	1322	3787.6	244|16587	16637	16637	16637|16637	Mammalia	Chiroptera	Phyllostomidae	Sturnira	Sturnira tildae
JFD1641
subject.tax.id	Count	query.acc.ver	subject.acc.ver	X..identity	Average.X..identity	X..identity.range	evalue	Average.evalue	evalue.range	alignment.length	Average.alignment.length	alignment.length.range	query.length	Average.query.length	query.length.range	subject.length	Average.subject.length	subject.length.range	class	order	family	genus	species
40233	2	1814101e-0de6-45d0-b291-97683ca9d350	AY395836.1	96.526	93.382	90.238|96.526	0	0	0|5.03e-137	806	613	420|806	1462	967.5	473|1462	2601	9656	2601|16711	Mammalia	Chiroptera	Phyllostomidae	Carollia	Carollia perspicillata
138695	10	0e334800-8274-4046-b67b-18252d1b72a6	ON527785.1	94.971	93.9695	90.531|97.348	0	8e-100	0|7.55e-99	696	1396	259|5635	1173	3547.7	295|16602	16708	16707.2	16706|16708	Mammalia	Chiroptera	Phyllostomidae	Carollia	Carollia brevicauda
138695	10	be05ea68-23a6-4478-b4e9-d5a10a196136	ON527784.1	94.737	93.9695	90.531|97.348	0	8e-100	0|7.55e-99	703	1396	259|5635	742	3547.7	295|16602	16706	16707.2	16706|16708	Mammalia	Chiroptera	Phyllostomidae	Carollia	Carollia brevicauda
138695	10	d5b04dfd-0dda-4532-bbba-831cf0f15132	ON527785.1	94.129	93.9695	90.531|97.348	0	8e-100	0|7.55e-99	1499	1396	259|5635	2433	3547.7	295|16602	16708	16707.2	16706|16708	Mammalia	Chiroptera	Phyllostomidae	Carollia	Carollia brevicauda
138695	10	357c35ea-9ed7-4a67-86da-c8ab6273f73c	ON527784.1	93.725	93.9695	90.531|97.348	0	8e-100	0|7.55e-99	749	1396	259|5635	766	3547.7	295|16602	16706	16707.2	16706|16708	Mammalia	Chiroptera	Phyllostomidae	Carollia	Carollia brevicauda
138695	10	37f9b0fb-4787-4e3d-b287-e4409079023f	ON527784.1	92.209	93.9695	90.531|97.348	0	8e-100	0|7.55e-99	5635	1396	259|5635	12254	3547.7	295|16602	16706	16707.2	16706|16708	Mammalia	Chiroptera	Phyllostomidae	Carollia	Carollia brevicauda
138695	10	2635d054-c38c-4a5c-a10b-cf84661a39e9	ON527785.1	90.531	93.9695	90.531|97.348	0	8e-100	0|7.55e-99	3369	1396	259|5635	16602	3547.7	295|16602	16708	16707.2	16706|16708	Mammalia	Chiroptera	Phyllostomidae	Carollia	Carollia brevicauda
138695	10	a1119333-9c82-480c-9176-8398d78d8771	ON527785.1	93.689	93.9695	90.531|97.348	2.19e-175	8e-100	0|7.55e-99	412	1396	259|5635	508	3547.7	295|16602	16708	16707.2	16706|16708	Mammalia	Chiroptera	Phyllostomidae	Carollia	Carollia brevicauda
138695	10	6d7448ef-f02e-4f17-b008-5922d22efa30	ON527785.1	94.92	93.9695	90.531|97.348	7.43e-165	8e-100	0|7.55e-99	374	1396	259|5635	405	3547.7	295|16602	16708	16707.2	16706|16708	Mammalia	Chiroptera	Phyllostomidae	Carollia	Carollia brevicauda
40233	2	da2ce7b2-6c4d-42bf-b974-5cd47905ae6d	HG003309.1	90.238	93.382	90.238|96.526	5.03e-137	0	0|5.03e-137	420	613	420|806	473	967.5	473|1462	16711	9656	2601|16711	Mammalia	Chiroptera	Phyllostomidae	Carollia	Carollia perspicillata
138695	10	aaa8f610-2e82-402e-9232-8d99c1cea2ae	ON527785.1	97.348	93.9695	90.531|97.348	2.25e-128	8e-100	0|7.55e-99	264	1396	259|5635	299	3547.7	295|16602	16708	16707.2	16706|16708	Mammalia	Chiroptera	Phyllostomidae	Carollia	Carollia brevicauda
138695	10	bc93c9bc-2095-4d2c-b96d-2d823800bb11	ON527784.1	93.436	93.9695	90.531|97.348	7.55e-99	8e-100	0|7.55e-99	259	1396	259|5635	295	3547.7	295|16602	16706	16707.2	16706|16708	Mammalia	Chiroptera	Phyllostomidae	Carollia	Carollia brevicauda
58060	1	3f88f1e2-22c2-4d1d-8510-dc4c61f12176	MN816304.1	100	100	100|100	2.96e-17	2.96e-17	2.96e-17|2.96e-17	45	45	45|45	355	355	355|355	16750	16750	16750|16750	Mammalia	Chiroptera	Pteropodidae	Cynopterus	Cynopterus brachyotis
JFD1648
subject.tax.id	Count	query.acc.ver	subject.acc.ver	X..identity	Average.X..identity	X..identity.range	evalue	Average.evalue	evalue.range	alignment.length	Average.alignment.length	alignment.length.range	query.length	Average.query.length	query.length.range	subject.length	Average.subject.length	subject.length.range	class	order	family	genus	species
27642	8	0c64082f-1aa8-42fe-af7e-9e5df2e568ca	JF448522.1	93.485	91.9704	90.099|93.485	0	2.9875e-07	0|2.39e-06	660	283.375	44|660	9229	6822	389|13354	657	10830.4	657|16546	Mammalia	Chiroptera	Phyllostomidae	Anoura	Anoura caudifer
27642	8	38e60950-7f81-4be2-9863-2e007ec192a2	HG003307.1	91.915	91.9704	90.099|93.485	1.16e-166	2.9875e-07	0|2.39e-06	470	283.375	44|660	5475	6822	389|13354	16546	10830.4	657|16546	Mammalia	Chiroptera	Phyllostomidae	Anoura	Anoura caudifer
148021	5	4099bb12-6706-42cb-b58d-2eb4d097c3df	NC_065676.1	92.128	91.777	90.404|94	2.11e-162	9.46e-45	2.11e-162|4.73e-44	470	277.2	149|470	494	678.6	222|1828	16470	16470	16470|16470	Mammalia	Chiroptera	Phyllostomidae	Anoura	Anoura geoffroyi
148021	5	30cdd984-d982-46ec-b9ed-861a7c5209ce	NC_065676.1	94	91.777	90.404|94	4.38e-121	9.46e-45	2.11e-162|4.73e-44	300	277.2	149|470	465	678.6	222|1828	16470	16470	16470|16470	Mammalia	Chiroptera	Phyllostomidae	Anoura	Anoura geoffroyi
27642	8	9a0e37ef-da2d-4825-ac93-3c7e9025efcf	HG003307.1	93.06	91.9704	90.099|93.485	3.37e-116	2.9875e-07	0|2.39e-06	317	283.375	44|660	9913	6822	389|13354	16546	10830.4	657|16546	Mammalia	Chiroptera	Phyllostomidae	Anoura	Anoura caudifer
999941	5	8b30a324-091c-41f7-b0fd-5b141bda796f	NC_065675.1	92.652	92.4866	91.475|94.667	3.07e-109	3.2e-24	3.07e-109|1.6e-23	313	230.6	75|313	7385	5785.4	1202|8728	16507	16507	16507|16507	Mammalia	Chiroptera	Phyllostomidae	Anoura	Anoura cultrata
27642	8	86570fb7-b198-4b56-a091-72f78eaaa6cc	AY395835.1	91.589	91.9704	90.099|93.485	1.4e-107	2.9875e-07	0|2.39e-06	321	283.375	44|660	389	6822	389|13354	2599	10830.4	657|16546	Mammalia	Chiroptera	Phyllostomidae	Anoura	Anoura caudifer
999941	5	0b772bf9-6e0a-4a8e-85e0-a63b47c8f15a	NC_065675.1	91.586	92.4866	91.475|94.667	1.16e-103	3.2e-24	3.07e-109|1.6e-23	309	230.6	75|313	3471	5785.4	1202|8728	16507	16507	16507|16507	Mammalia	Chiroptera	Phyllostomidae	Anoura	Anoura cultrata
999941	5	37377aac-3ed8-46c1-9a58-59875251dfd5	NC_065675.1	91.475	92.4866	91.475|94.667	5.44e-100	3.2e-24	3.07e-109|1.6e-23	305	230.6	75|313	1202	5785.4	1202|8728	16507	16507	16507|16507	Mammalia	Chiroptera	Phyllostomidae	Anoura	Anoura cultrata
148021	5	124f4f2c-bd99-48dc-bc87-9589a5504d1a	NC_065676.1	91.078	91.777	90.404|94	4.35e-82	9.46e-45	2.11e-162|4.73e-44	269	277.2	149|470	1828	678.6	222|1828	16470	16470	16470|16470	Mammalia	Chiroptera	Phyllostomidae	Anoura	Anoura geoffroyi
148092	1	b81eb427-59a8-477b-9d49-d9c65611decb	AY395839.1	92.07	92.07	92.07|92.07	9.05e-76	9.05e-76	9.05e-76|9.05e-76	227	227	227|227	4683	4683	4683|4683	2603	2603	2603|2603	Mammalia	Chiroptera	Phyllostomidae	Erophylla	Erophylla sezekorni
27642	8	a8c8debe-9329-4d24-a66e-f9def106c29c	HG003307.1	91.304	91.9704	90.099|93.485	1.23e-67	2.9875e-07	0|2.39e-06	230	283.375	44|660	13354	6822	389|13354	16546	10830.4	657|16546	Mammalia	Chiroptera	Phyllostomidae	Anoura	Anoura caudifer
27647	1	34373cad-8965-4a61-930f-0994048ceaab	AY395807.1	90.213	90.213	90.213|90.213	1.53e-63	1.53e-63	1.53e-63|1.53e-63	235	235	235|235	12200	12200	12200|12200	2600	2600	2600|2600	Mammalia	Chiroptera	Phyllostomidae	Chiroderma	Chiroderma trinitatum
148021	5	a74a167e-7cac-483f-a621-c8b23f899224	NC_065676.1	90.404	91.777	90.404|94	7.72e-54	9.46e-45	2.11e-162|4.73e-44	198	277.2	149|470	384	678.6	222|1828	16470	16470	16470|16470	Mammalia	Chiroptera	Phyllostomidae	Anoura	Anoura geoffroyi
9421	2	70fe2f3b-2d72-4558-8734-ddda0aa56c00	HG003308.1	96.875	95.3365	93.798|96.875	2.24e-53	1.33e-44	2.24e-53|2.66e-44	128	128.5	128|129	16232	9000.5	1769|16232	16785	16785	16785|16785	Mammalia	Chiroptera	Phyllostomidae	Brachyphylla	Brachyphylla cavernarum
9421	2	20ff6463-8f60-4767-98be-a5df5895fe45	HG003308.1	93.798	95.3365	93.798|96.875	2.66e-44	1.33e-44	2.24e-53|2.66e-44	129	128.5	128|129	1769	9000.5	1769|16232	16785	16785	16785|16785	Mammalia	Chiroptera	Phyllostomidae	Brachyphylla	Brachyphylla cavernarum
999941	5	9ebaa633-ec3d-4d97-83fa-4eb69abfb7dc	NC_065675.1	92.053	92.4866	91.475|94.667	3.17e-44	3.2e-24	3.07e-109|1.6e-23	151	230.6	75|313	8141	5785.4	1202|8728	16507	16507	16507|16507	Mammalia	Chiroptera	Phyllostomidae	Anoura	Anoura cultrata
148021	5	324b58fa-0587-41a4-b195-5e024681cf92	NC_065676.1	91.275	91.777	90.404|94	4.73e-44	9.46e-45	2.11e-162|4.73e-44	149	277.2	149|470	222	678.6	222|1828	16470	16470	16470|16470	Mammalia	Chiroptera	Phyllostomidae	Anoura	Anoura geoffroyi
27642	8	e9dbb2d6-d997-4c24-9b34-521c1f09a5a6	HG003307.1	91.129	91.9704	90.099|93.485	1.91e-35	2.9875e-07	0|2.39e-06	124	283.375	44|660	1750	6822	389|13354	16546	10830.4	657|16546	Mammalia	Chiroptera	Phyllostomidae	Anoura	Anoura caudifer
94961	1	8bec1b82-5a88-452d-bf00-f1629586a501	AY197012.1	90.511	90.511	90.511|90.511	9.47e-33	9.47e-33	9.47e-33|9.47e-33	137	137	137|137	3751	3751	3751|3751	1204	1204	1204|1204	Mammalia	Chiroptera	Mystacinidae	Mystacina	Mystacina tuberculata
148041	1	a68620ed-6654-4b14-b02c-fc57fc791344	DQ312379.1	92.593	92.593	92.593|92.593	6.37e-31	6.37e-31	6.37e-31|6.37e-31	108	108	108|108	1107	1107	1107|1107	2086	2086	2086|2086	Mammalia	Chiroptera	Phyllostomidae	Vampyrodes	Vampyrodes caraccioli
9426	1	c013d2f4-5c15-4763-9309-4848d0125b87	MZ391834.1	92	92	92|92	1.7e-27	1.7e-27	1.7e-27|1.7e-27	100	100	100|100	3262	3262	3262|3262	16717	16717	16717|16717	Mammalia	Chiroptera	Phyllostomidae	Tonatia	Tonatia bidens
2019462	2	03e130c4-682f-421b-91d0-b76efb3a108a	NC_065687.1	91.837	92.585	91.837|93.333	5.93e-26	1.835e-19	5.93e-26|3.67e-19	98	86.5	75|98	508	7602	508|14696	16563	16563	16563|16563	Mammalia	Chiroptera	Phyllostomidae	Sturnira	Sturnira bakeri
999941	5	07cd5a61-ce5e-4ea4-908f-6a83680bb99b	NC_065675.1	94.667	92.4866	91.475|94.667	1.6e-23	3.2e-24	3.07e-109|1.6e-23	75	230.6	75|313	8728	5785.4	1202|8728	16507	16507	16507|16507	Mammalia	Chiroptera	Phyllostomidae	Anoura	Anoura cultrata
27642	8	fae01ac2-95bb-4a28-b1d5-4e46169b3f9f	JF447870.1	90.099	91.9704	90.099|93.485	7.79e-21	2.9875e-07	0|2.39e-06	101	283.375	44|660	4741	6822	389|13354	657	10830.4	657|16546	Mammalia	Chiroptera	Phyllostomidae	Anoura	Anoura caudifer
196700	1	aa803fdb-77ac-4eca-ab9a-7b8d1df4d42e	MW554922.1	93.333	93.333	93.333|93.333	1.23e-19	1.23e-19	1.23e-19|1.23e-19	75	75	75|75	4938	4938	4938|4938	16612	16612	16612|16612	Mammalia	Chiroptera	Phyllostomidae	Sturnira	Sturnira parvidens
2019462	2	a72603d5-83a5-4751-933f-3c1d9b5b73af	NC_065687.1	93.333	92.585	91.837|93.333	3.67e-19	1.835e-19	5.93e-26|3.67e-19	75	86.5	75|98	14696	7602	508|14696	16563	16563	16563|16563	Mammalia	Chiroptera	Phyllostomidae	Sturnira	Sturnira bakeri
412089	1	c9b12fab-7e47-4919-ba90-20644a706d3c	JX276316.1	95.918	95.918	95.918|95.918	5.84e-14	5.84e-14	5.84e-14|5.84e-14	49	49	49|49	208	208	208|208	1190	1190	1190|1190	Mammalia	Chiroptera	Vespertilionidae	Vansonia	Vansonia rueppellii
685729	1	83b25670-0f83-45e3-bea5-1c9ab25d19cc	OK274260.1	90.123	90.123	90.123|90.123	7.04e-14	7.04e-14	7.04e-14|7.04e-14	81	81	81|81	3509	3509	3509|3509	16699	16699	16699|16699	Mammalia	Chiroptera	Vespertilionidae	Kerivoula	Kerivoula minuta
138696	1	525603e5-235c-4f7a-a646-50222abd27c6	NC_065677.1	91.304	91.304	91.304|91.304	3.64e-13	3.64e-13	3.64e-13|3.64e-13	69	69	69|69	4652	4652	4652|4652	16686	16686	16686|16686	Mammalia	Chiroptera	Phyllostomidae	Carollia	Carollia castanea
225401	1	889379de-47bd-4259-81c0-965dc9593642	HQ184048.1	95	95	95|95	4.76e-09	4.76e-09	4.76e-09|4.76e-09	40	40	40|40	1157	1157	1157|1157	17159	17159	17159|17159	Mammalia	Chiroptera	Vespertilionidae	Myotis	Myotis formosus
27642	8	7b148cec-62b9-4e6f-b4ed-92e393481556	HG003307.1	93.182	91.9704	90.099|93.485	2.39e-06	2.9875e-07	0|2.39e-06	44	283.375	44|660	9725	6822	389|13354	16546	10830.4	657|16546	Mammalia	Chiroptera	Phyllostomidae	Anoura	Anoura caudifer
JFD1642
subject.tax.id	Count	query.acc.ver	subject.acc.ver	X..identity	Average.X..identity	X..identity.range	evalue	Average.evalue	evalue.range	alignment.length	Average.alignment.length	alignment.length.range	query.length	Average.query.length	query.length.range	subject.length	Average.subject.length	subject.length.range	class	order	family	genus	species
27634	11	a420ed77-c979-41b0-b1b9-285f4f1bcc59	JN209840.1	97.539	95.2815	90.559|98.773	0	0	0|2.82e-121	772	1938.82	256|15700	939	2154.82	306|16797	16709	16709	16709|16709	Mammalia	Chiroptera	Phyllostomidae	Artibeus	Artibeus lituratus
27634	11	afcf5cf5-195a-4fb3-8393-d784cfacaef9	JN209840.1	96.436	95.2815	90.559|98.773	0	0	0|2.82e-121	1010	1938.82	256|15700	1046	2154.82	306|16797	16709	16709	16709|16709	Mammalia	Chiroptera	Phyllostomidae	Artibeus	Artibeus lituratus
27634	11	d04acc22-d2b4-4ea8-88c6-1a876d2f4730	JN209840.1	95.626	95.2815	90.559|98.773	0	0	0|2.82e-121	503	1938.82	256|15700	999	2154.82	306|16797	16709	16709	16709|16709	Mammalia	Chiroptera	Phyllostomidae	Artibeus	Artibeus lituratus
27634	11	6d8eba67-e249-4e2d-a93d-6bb62ced2257	JN209840.1	95.108	95.2815	90.559|98.773	0	0	0|2.82e-121	15700	1938.82	256|15700	16797	2154.82	306|16797	16709	16709	16709|16709	Mammalia	Chiroptera	Phyllostomidae	Artibeus	Artibeus lituratus
27634	11	49bb78b6-23c0-4be4-acaa-5168f595aaf7	JN209840.1	94.489	95.2815	90.559|98.773	0	0	0|2.82e-121	617	1938.82	256|15700	1026	2154.82	306|16797	16709	16709	16709|16709	Mammalia	Chiroptera	Phyllostomidae	Artibeus	Artibeus lituratus
27634	11	d152128f-fd1f-4af4-9b41-0b037f268cc9	JN209840.1	91.322	95.2815	90.559|98.773	0	0	0|2.82e-121	749	1938.82	256|15700	764	2154.82	306|16797	16709	16709	16709|16709	Mammalia	Chiroptera	Phyllostomidae	Artibeus	Artibeus lituratus
27634	11	6309bcf1-fa6e-4b92-8cb8-e2c68d44887e	JN209840.1	90.559	95.2815	90.559|98.773	0	0	0|2.82e-121	752	1938.82	256|15700	749	2154.82	306|16797	16709	16709	16709|16709	Mammalia	Chiroptera	Phyllostomidae	Artibeus	Artibeus lituratus
27634	11	abf92670-b9ca-4c98-8c53-24399370d921	JN209840.1	98.209	95.2815	90.559|98.773	1.45e-172	0	0|2.82e-121	335	1938.82	256|15700	379	2154.82	306|16797	16709	16709	16709|16709	Mammalia	Chiroptera	Phyllostomidae	Artibeus	Artibeus lituratus
27634	11	a01bea21-9138-4a59-86fb-4cbfc9cba8e8	JN209840.1	98.773	95.2815	90.559|98.773	2.18e-171	0	0|2.82e-121	326	1938.82	256|15700	374	2154.82	306|16797	16709	16709	16709|16709	Mammalia	Chiroptera	Phyllostomidae	Artibeus	Artibeus lituratus
27634	11	a8a8529a-b932-404a-84a7-ca57cee2700f	JN209840.1	93.16	95.2815	90.559|98.773	2.2e-125	0	0|2.82e-121	307	1938.82	256|15700	324	2154.82	306|16797	16709	16709	16709|16709	Mammalia	Chiroptera	Phyllostomidae	Artibeus	Artibeus lituratus
27634	11	c3f47194-b787-4ae9-a919-b24861c73f0b	JN209840.1	96.875	95.2815	90.559|98.773	2.82e-121	0	0|2.82e-121	256	1938.82	256|15700	306	2154.82	306|16797	16709	16709	16709|16709	Mammalia	Chiroptera	Phyllostomidae	Artibeus	Artibeus lituratus
JFD1651
subject.tax.id	Count	query.acc.ver	subject.acc.ver	X..identity	Average.X..identity	X..identity.range	evalue	Average.evalue	evalue.range	alignment.length	Average.alignment.length	alignment.length.range	query.length	Average.query.length	query.length.range	subject.length	Average.subject.length	subject.length.range	class	order	family	genus	species
27638	1	9ea29aa0-74f5-4bdf-8edd-46852b8f1d7b	MK749502.1	99.248	99.248	99.248|99.248	2.54e-142	0	2.54e-142|2.54e-142	266	266	266|266	493	493	493|493	666	666	666|666	Mammalia	Chiroptera	Phyllostomidae	Glossophaga	Glossophaga soricina
JFD1650
subject.tax.id	Count	query.acc.ver	subject.acc.ver	X..identity	Average.X..identity	X..identity.range	evalue	Average.evalue	evalue.range	alignment.length	Average.alignment.length	alignment.length.range	query.length	Average.query.length	query.length.range	subject.length	Average.subject.length	subject.length.range	class	order	family	genus	species
27634	14	202f2e07-e1ea-4ecb-8ea1-4e2674d807f3	JN209840.1	95.208	93.3645	90.922|95.608	0	6.986e-97	0|9.78e-96	1252	1525.36	233|9002	6656	2068.93	327|8913	16709	16709	16709|16709	Mammalia	Chiroptera	Phyllostomidae	Artibeus	Artibeus lituratus
51014	1	132cc3af-c714-4347-8d47-7cccbd383d09	HQ702540.1	94.99	94.99	94.99|94.99	0	0	0|0	519	519	519|519	540	540	540|540	1140	1140	1140|1140	Mammalia	Chiroptera	Phyllostomidae	Artibeus	Artibeus intermedius
27634	14	1754fd3b-3ee7-434e-ad99-a9e825f7f4d0	JN209840.1	94.695	93.3645	90.922|95.608	0	6.986e-97	0|9.78e-96	622	1525.36	233|9002	995	2068.93	327|8913	16709	16709	16709|16709	Mammalia	Chiroptera	Phyllostomidae	Artibeus	Artibeus lituratus
27634	14	b7895ed9-762e-4664-8fde-fb842d27b040	JN209840.1	94.623	93.3645	90.922|95.608	0	6.986e-97	0|9.78e-96	9002	1525.36	233|9002	8913	2068.93	327|8913	16709	16709	16709|16709	Mammalia	Chiroptera	Phyllostomidae	Artibeus	Artibeus lituratus
27634	14	fce79c3d-1647-4ca7-9337-ae8ba2c3f566	JN209840.1	94.258	93.3645	90.922|95.608	0	6.986e-97	0|9.78e-96	1045	1525.36	233|9002	1073	2068.93	327|8913	16709	16709	16709|16709	Mammalia	Chiroptera	Phyllostomidae	Artibeus	Artibeus lituratus
27634	14	57b0af45-ffe5-41f5-b8f4-2c452632e361	JN209840.1	92.872	93.3645	90.922|95.608	0	6.986e-97	0|9.78e-96	477	1525.36	233|9002	499	2068.93	327|8913	16709	16709	16709|16709	Mammalia	Chiroptera	Phyllostomidae	Artibeus	Artibeus lituratus
27634	14	01379481-9f35-462a-a5f4-2db429498670	JN209840.1	92.843	93.3645	90.922|95.608	0	6.986e-97	0|9.78e-96	503	1525.36	233|9002	533	2068.93	327|8913	16709	16709	16709|16709	Mammalia	Chiroptera	Phyllostomidae	Artibeus	Artibeus lituratus
27634	14	fe838ee8-adb7-460f-883c-3a33002a3567	JN209840.1	92.466	93.3645	90.922|95.608	0	6.986e-97	0|9.78e-96	876	1525.36	233|9002	1726	2068.93	327|8913	16709	16709	16709|16709	Mammalia	Chiroptera	Phyllostomidae	Artibeus	Artibeus lituratus
27634	14	129d870c-2055-44b5-ab7b-8ce2b767184e	JN209840.1	92.367	93.3645	90.922|95.608	0	6.986e-97	0|9.78e-96	3000	1525.36	233|9002	3748	2068.93	327|8913	16709	16709	16709|16709	Mammalia	Chiroptera	Phyllostomidae	Artibeus	Artibeus lituratus
27634	14	e9ad8cee-422d-49b3-8d21-724794dd1787	JN209840.1	91.744	93.3645	90.922|95.608	0	6.986e-97	0|9.78e-96	1187	1525.36	233|9002	1186	2068.93	327|8913	16709	16709	16709|16709	Mammalia	Chiroptera	Phyllostomidae	Artibeus	Artibeus lituratus
27634	14	5f7b6fc1-2113-46bb-aa22-8aeeab002476	JN209840.1	91.414	93.3645	90.922|95.608	0	6.986e-97	0|9.78e-96	1747	1525.36	233|9002	1744	2068.93	327|8913	16709	16709	16709|16709	Mammalia	Chiroptera	Phyllostomidae	Artibeus	Artibeus lituratus
27634	14	3dd31514-a3aa-466b-a216-803c7d850d87	JN209840.1	90.922	93.3645	90.922|95.608	0	6.986e-97	0|9.78e-96	716	1525.36	233|9002	714	2068.93	327|8913	16709	16709	16709|16709	Mammalia	Chiroptera	Phyllostomidae	Artibeus	Artibeus lituratus
27634	14	bb7bbf63-c651-4b8a-8574-1f191be66a56	JN209840.1	93.233	93.3645	90.922|95.608	4.23e-160	6.986e-97	0|9.78e-96	399	1525.36	233|9002	433	2068.93	327|8913	16709	16709	16709|16709	Mammalia	Chiroptera	Phyllostomidae	Artibeus	Artibeus lituratus
27634	14	82cc9974-2d34-4014-824f-58c3da8eb71e	JN209840.1	95.608	93.3645	90.922|95.608	1.63e-129	6.986e-97	0|9.78e-96	296	1525.36	233|9002	327	2068.93	327|8913	16709	16709	16709|16709	Mammalia	Chiroptera	Phyllostomidae	Artibeus	Artibeus lituratus
27634	14	537d1ca7-2d40-472d-866e-bd3afbb8590a	JN209840.1	94.85	93.3645	90.922|95.608	9.78e-96	6.986e-97	0|9.78e-96	233	1525.36	233|9002	418	2068.93	327|8913	16709	16709	16709|16709	Mammalia	Chiroptera	Phyllostomidae	Artibeus	Artibeus lituratus
148053	1	94c646dc-5230-4568-9d10-0aba57567910	ON260904.1	92	92	92|92	7.12e-08	7.12e-08	7.12e-08|7.12e-08	50	50	50|50	4395	4395	4395|4395	16668	16668	16668|16668	Mammalia	Chiroptera	Phyllostomidae	Musonycteris	Musonycteris harrisoni
148061	1	6e1870de-360b-483c-ade7-31e011b40a96	KU743908.1	97.059	97.059	97.059|97.059	2.25e-07	2.25e-07	2.25e-07|2.25e-07	34	34	34|34	3562	3562	3562|3562	16661	16661	16661|16661	Mammalia	Chiroptera	Phyllostomidae	Lonchorhina	Lonchorhina aurita
JFD1649
subject.tax.id	Count	query.acc.ver	subject.acc.ver	X..identity	Average.X..identity	X..identity.range	evalue	Average.evalue	evalue.range	alignment.length	Average.alignment.length	alignment.length.range	query.length	Average.query.length	query.length.range	subject.length	Average.subject.length	subject.length.range	class	order	family	genus	species
192402	1	f95b8c67-46ea-470e-9020-e7084e0ee082	KC753783.1	95.656	95.656	95.656|95.656	0	0	0|0	1151	1151	1151|1151	6801	6801	6801|6801	1140	1140	1140|1140	Mammalia	Chiroptera	Phyllostomidae	Sturnira	Sturnira bogotensis
27661	1	791248e3-3564-489e-8e31-3c8f5a3fde30	HG003314.1	92.966	92.966	92.966|92.966	0	0	0|0	981	981	981|981	994	994	994|994	16637	16637	16637|16637	Mammalia	Chiroptera	Phyllostomidae	Sturnira	Sturnira tildae
192405	1	b2cc66b5-63b4-4adc-ad9d-261aecdc27be	NC_065691.1	90.909	90.909	90.909|90.909	4.7e-11	4.7e-11	4.7e-11|4.7e-11	55	55	55|55	684	684	684|684	16641	16641	16641|16641	Mammalia	Chiroptera	Phyllostomidae	Sturnira	Sturnira ludovici
JFD1652
subject.tax.id	Count	query.acc.ver	subject.acc.ver	X..identity	Average.X..identity	X..identity.range	evalue	Average.evalue	evalue.range	alignment.length	Average.alignment.length	alignment.length.range	query.length	Average.query.length	query.length.range	subject.length	Average.subject.length	subject.length.range	class	order	family	genus	species
40233	4	f59175c7-43f3-4539-b4c4-1ef2981d6478	HG003309.1	97.599	94.8662	93.044|97.599	0	0	0|0	583	1039.25	583|1567	622	1174.5	622|1563	16711	13183.5	2601|16711	Mammalia	Chiroptera	Phyllostomidae	Carollia	Carollia perspicillata
138695	9	cd0923fc-1161-4c64-93d6-8f9f00376daf	ON527784.1	96.875	93.2431	90.196|96.875	0	0	0|0	448	1790.44	448|4826	488	2079.67	488|5255	16706	16707.1	16706|16708	Mammalia	Chiroptera	Phyllostomidae	Carollia	Carollia brevicauda
40233	4	260fca13-9da0-4f51-b455-092a14d30d10	HG003309.1	94.56	94.8662	93.044|97.599	0	0	0|0	1397	1039.25	583|1567	1435	1174.5	622|1563	16711	13183.5	2601|16711	Mammalia	Chiroptera	Phyllostomidae	Carollia	Carollia perspicillata
138695	9	2904c8ed-3ed9-4fb3-87f1-c72d0e6a24e8	ON527784.1	94.385	93.2431	90.196|96.875	0	0	0|0	4826	1790.44	448|4826	5255	2079.67	488|5255	16706	16707.1	16706|16708	Mammalia	Chiroptera	Phyllostomidae	Carollia	Carollia brevicauda
40233	4	6d473e85-6555-4c35-83be-38e98df7ff74	HG003309.1	94.262	94.8662	93.044|97.599	0	0	0|0	610	1039.25	583|1567	1078	1174.5	622|1563	16711	13183.5	2601|16711	Mammalia	Chiroptera	Phyllostomidae	Carollia	Carollia perspicillata
138695	9	14dc4f9f-cba0-47ce-983a-82b4abc34dc7	ON527784.1	94.012	93.2431	90.196|96.875	0	0	0|0	1169	1790.44	448|4826	1185	2079.67	488|5255	16706	16707.1	16706|16708	Mammalia	Chiroptera	Phyllostomidae	Carollia	Carollia brevicauda
138695	9	1ac046cf-7890-4baf-abd4-6782ba932272	ON527785.1	93.816	93.2431	90.196|96.875	0	0	0|0	663	1790.44	448|4826	1201	2079.67	488|5255	16708	16707.1	16706|16708	Mammalia	Chiroptera	Phyllostomidae	Carollia	Carollia brevicauda
138695	9	8265779f-6d31-4981-9103-3abd35a4cae8	ON527785.1	93.102	93.2431	90.196|96.875	0	0	0|0	2798	1790.44	448|4826	3444	2079.67	488|5255	16708	16707.1	16706|16708	Mammalia	Chiroptera	Phyllostomidae	Carollia	Carollia brevicauda
40233	4	a33efc9f-7a02-4f4c-a06a-c04efa4e21d3	AY395836.1	93.044	94.8662	93.044|97.599	0	0	0|0	1567	1039.25	583|1567	1563	1174.5	622|1563	2601	13183.5	2601|16711	Mammalia	Chiroptera	Phyllostomidae	Carollia	Carollia perspicillata
138695	9	46d63f2f-19d3-4834-a2d1-58c30604afd9	ON527784.1	92.672	93.2431	90.196|96.875	0	0	0|0	655	1790.44	448|4826	681	2079.67	488|5255	16706	16707.1	16706|16708	Mammalia	Chiroptera	Phyllostomidae	Carollia	Carollia brevicauda
138695	9	6f4655e0-68d1-4059-99bd-ea806759af91	ON527785.1	92.489	93.2431	90.196|96.875	0	0	0|0	4234	1790.44	448|4826	4166	2079.67	488|5255	16708	16707.1	16706|16708	Mammalia	Chiroptera	Phyllostomidae	Carollia	Carollia brevicauda
138695	9	07303254-b3de-4eb8-a1a1-f701b9e0d065	ON527785.1	91.641	93.2431	90.196|96.875	0	0	0|0	658	1790.44	448|4826	1181	2079.67	488|5255	16708	16707.1	16706|16708	Mammalia	Chiroptera	Phyllostomidae	Carollia	Carollia brevicauda
138695	9	c2f6d0a3-0ef8-46b9-b331-da2ed5521cfe	ON527785.1	90.196	93.2431	90.196|96.875	0	0	0|0	663	1790.44	448|4826	1116	2079.67	488|5255	16708	16707.1	16706|16708	Mammalia	Chiroptera	Phyllostomidae	Carollia	Carollia brevicauda
JFD1643
subject.tax.id	Count	query.acc.ver	subject.acc.ver	X..identity	Average.X..identity	X..identity.range	evalue	Average.evalue	evalue.range	alignment.length	Average.alignment.length	alignment.length.range	query.length	Average.query.length	query.length.range	subject.length	Average.subject.length	subject.length.range	class	order	family	genus	species
153286	6	894cdecf-b0ae-488d-b9ad-77efaeb02c6a	MF143495.1	93.323	92.9567	91.837|95.11	0	0	0|1.93e-143	4703	2419.5	392|6849	5811	2858.33	444|8153	17047	14313.7	647|17047	Mammalia	Chiroptera	Vespertilionidae	Myotis	Myotis nigricans
153286	6	b914de36-529b-44da-bcca-9357a7564651	MF143495.1	92.992	92.9567	91.837|95.11	0	0	0|1.93e-143	6849	2419.5	392|6849	8153	2858.33	444|8153	17047	14313.7	647|17047	Mammalia	Chiroptera	Vespertilionidae	Myotis	Myotis nigricans
153286	6	9d2d4fa4-d102-402b-a3f5-356d32d270f1	MF143495.1	92.391	92.9567	91.837|95.11	0	0	0|1.93e-143	736	2419.5	392|6849	768	2858.33	444|8153	17047	14313.7	647|17047	Mammalia	Chiroptera	Vespertilionidae	Myotis	Myotis nigricans
153286	6	0bac2810-dbd6-4ba7-9872-7288faa5e9c1	MF143495.1	92.087	92.9567	91.837|95.11	0	0	0|1.93e-143	1428	2419.5	392|6849	1407	2858.33	444|8153	17047	14313.7	647|17047	Mammalia	Chiroptera	Vespertilionidae	Myotis	Myotis nigricans
153286	6	4dbb6253-c83b-4f8d-809e-5b77a8ebea14	MF143495.1	95.11	92.9567	91.837|95.11	3.24e-177	0	0|1.93e-143	409	2419.5	392|6849	444	2858.33	444|8153	17047	14313.7	647|17047	Mammalia	Chiroptera	Vespertilionidae	Myotis	Myotis nigricans
225400	1	334087c7-3718-4bcf-9bff-da6a9eacbdfb	KM233172.1	92.01	92.01	92.01|92.01	5.3e-146	0	5.3e-146|5.3e-146	388	388	388|388	1368	1368	1368|1368	17531	17531	17531|17531	Mammalia	Chiroptera	Vespertilionidae	Myotis	Myotis davidii
153286	6	e31904f7-2f94-452f-9be9-d063a3c18550	MG191862.1	91.837	92.9567	91.837|95.11	1.93e-143	0	0|1.93e-143	392	2419.5	392|6849	567	2858.33	444|8153	647	14313.7	647|17047	Mammalia	Chiroptera	Vespertilionidae	Myotis	Myotis nigricans
258938	1	365a1a20-c4e2-45e0-ad8a-4f4eab33a12b	MF143483.1	91.083	91.083	91.083|91.083	8.74e-48	8.74e-48	8.74e-48|8.74e-48	157	157	157|157	2024	2024	2024|2024	17384	17384	17384|17384	Mammalia	Chiroptera	Vespertilionidae	Myotis	Myotis fortidens
JFD1636
subject.tax.id	Count	query.acc.ver	subject.acc.ver	X..identity	Average.X..identity	X..identity.range	evalue	Average.evalue	evalue.range	alignment.length	Average.alignment.length	alignment.length.range	query.length	Average.query.length	query.length.range	subject.length	Average.subject.length	subject.length.range	class	order	family	genus	species
124751	6	271d35c9-2c49-4a71-abd0-eca4afde8094	AF263216.1	94.665	93.6112	90.984|94.706	0	4.41667e-32	0|2.65e-31	2624	989.333	122|2624	4975	5906.83	1711|14732	2613	1550.5	657|2613	Mammalia	Chiroptera	Molossidae	Molossus	Molossus rufus
124751	6	3d0ad7de-f524-43b3-8602-a23ffb4b442c	MH058086.1	94.372	93.6112	90.984|94.706	0	4.41667e-32	0|2.65e-31	693	989.333	122|2624	2319	5906.83	1711|14732	1140	1550.5	657|2613	Mammalia	Chiroptera	Molossidae	Molossus	Molossus rufus
124751	6	ba242233-3699-4d81-b116-b90c0437f037	MH058086.1	93.869	93.6112	90.984|94.706	0	4.41667e-32	0|2.65e-31	1158	989.333	122|2624	14732	5906.83	1711|14732	1140	1550.5	657|2613	Mammalia	Chiroptera	Molossidae	Molossus	Molossus rufus
2801928	1	902dcf38-c9c3-435e-8f88-76c2515cfa5f	MT262835.1	93.396	93.396	93.396|93.396	0	0	0|0	636	636	636|636	3657	3657	3657|3657	1114	1114	1114|1114	Mammalia	Chiroptera	Molossidae	Molossus	Molossus sp. Santa Fe177
124751	6	0b31e3bb-69b3-4701-8f67-c8a604c4403f	MH058086.1	93.071	93.6112	90.984|94.706	0	4.41667e-32	0|2.65e-31	1169	989.333	122|2624	4808	5906.83	1711|14732	1140	1550.5	657|2613	Mammalia	Chiroptera	Molossidae	Molossus	Molossus rufus
999942	1	889ae9e1-88b3-4639-a2c3-2ecebf93606c	KT721460.1	91.71	91.71	91.71|91.71	0	0	0|0	579	579	579|579	6875	6875	6875|6875	615	615	615|615	Mammalia	Chiroptera	Molossidae	Molossus	Molossus coibensis
124759	1	a7212461-cd2a-4a5c-a917-f9b404ca5052	JF444948.1	97.119	97.119	97.119|97.119	2.64e-115	0	2.64e-115|2.64e-115	243	243	243|243	352	352	352|352	657	657	657|657	Mammalia	Chiroptera	Thyropteridae	Thyroptera	Thyroptera tricolor
124751	6	546c7016-3ec3-4cdd-b822-08fd546d9df1	MH185178.1	94.706	93.6112	90.984|94.706	9.25e-67	4.41667e-32	0|2.65e-31	170	989.333	122|2624	1711	5906.83	1711|14732	657	1550.5	657|2613	Mammalia	Chiroptera	Molossidae	Molossus	Molossus rufus
124751	6	c3c49c33-9da1-4270-97eb-44e1a7702f34	AF263216.1	90.984	93.6112	90.984|94.706	2.65e-31	4.41667e-32	0|2.65e-31	122	989.333	122|2624	6896	5906.83	1711|14732	2613	1550.5	657|2613	Mammalia	Chiroptera	Molossidae	Molossus	Molossus rufus
59483	4	8b335267-32a7-4a4f-ac69-3984cae9ff45	KY581661.1	92.391	92.8835	90.566|96.774	5e-25	1.57002e-06	5e-25|6.28e-06	92	67	53|92	16155	13223	6556|16155	16869	16869	16869|16869	Mammalia	Chiroptera	Molossidae	Tadarida	Tadarida teniotis
59483	4	d9a5aa54-6c6f-44f1-860b-096859370900	KY581661.1	96.774	92.8835	90.566|96.774	2.33e-20	1.57002e-06	5e-25|6.28e-06	62	67	53|92	14181	13223	6556|16155	16869	16869	16869|16869	Mammalia	Chiroptera	Molossidae	Tadarida	Tadarida teniotis
77229	1	72e4903a-d379-42d1-b0fe-3e7931aa99c5	OK274257.1	92	92	92|92	8.78e-19	8.78e-19	8.78e-19|8.78e-19	75	75	75|75	611	611	611|611	16687	16687	16687|16687	Mammalia	Chiroptera	Pteropodidae	Balionycteris	Balionycteris maculata
124750	1	1336c270-a123-425c-9059-190a6da38603	OP205373.1	93.151	93.151	93.151|93.151	2.76e-18	2.76e-18	2.76e-18|2.76e-18	73	73	73|73	7293	7293	7293|7293	16792	16792	16792|16792	Mammalia	Chiroptera	Phyllostomidae	Macrotus	Macrotus waterhousii
2049285	1	4042eb2c-98bf-417d-bb13-151fce1cc618	MK177282.1	92.647	92.647	92.647|92.647	7.66e-16	7.66e-16	7.66e-16|7.66e-16	68	68	68|68	2265	2265	2265|2265	16622	16622	16622|16622	Mammalia	Chiroptera	Molossidae	Tadarida	Tadarida latouchei
478698	2	26bd594c-9a11-4de8-bc31-2262bd078295	KY581660.1	90.476	92.408	90.476|94.34	1.02e-15	2.306e-14	1.02e-15|4.51e-14	84	68.5	53|84	11737	6996	2255|11737	16216	16216	16216|16216	Mammalia	Chiroptera	Molossidae	Chaerephon	Chaerephon plicatus
478698	2	0de71b02-2a7c-444b-9aa3-6000ea1878af	KY581660.1	94.34	92.408	90.476|94.34	4.51e-14	2.306e-14	1.02e-15|4.51e-14	53	68.5	53|84	2255	6996	2255|11737	16216	16216	16216|16216	Mammalia	Chiroptera	Molossidae	Chaerephon	Chaerephon plicatus
59483	4	15dc1e20-0dc9-483c-9892-6637bbd7e617	KY581661.1	91.803	92.8835	90.566|96.774	7.42e-11	1.57002e-06	5e-25|6.28e-06	61	67	53|92	16000	13223	6556|16155	16869	16869	16869|16869	Mammalia	Chiroptera	Molossidae	Tadarida	Tadarida teniotis
1609901	1	4e7497e0-63aa-4902-80aa-1760fe916cc7	MN816360.1	100	100	100|100	2.52e-10	2.52e-10	2.52e-10|2.52e-10	36	36	36|36	13957	13957	13957|13957	16727	16727	16727|16727	Mammalia	Chiroptera	Pteropodidae	Scotonycteris	Scotonycteris bergmansi
999964	1	d023a7fe-cddc-4b5b-a34d-ebf10dcbc27e	KR606332.1	90	90	90|90	4.56e-09	4.56e-09	4.56e-09|4.56e-09	60	60	60|60	1110	1110	1110|1110	1124	1124	1124|1124	Mammalia	Chiroptera	Molossidae	Mormopterus	Mormopterus jugularis
867883	1	dcc762fe-21a1-4d61-8cfb-5b8a7a2e30c7	HM561629.1	97.297	97.297	97.297|97.297	1.12e-08	1.12e-08	1.12e-08|1.12e-08	37	37	37|37	2708	2708	2708|2708	2675	2675	2675|2675	Mammalia	Chiroptera	Vespertilionidae	Pipistrellus	Pipistrellus paterculus
105295	1	259541a1-0663-4aee-8323-fa3771f4ea5c	KX355640.1	95	95	95|95	6.83e-07	6.83e-07	6.83e-07|6.83e-07	40	40	40|40	10817	10817	10817|10817	17236	17236	17236|17236	Mammalia	Chiroptera	Vespertilionidae	Pipistrellus	Pipistrellus abramus
59483	4	ce10eebf-f204-4e7d-9697-31f72bd9d162	KY581661.1	90.566	92.8835	90.566|96.774	6.28e-06	1.57002e-06	5e-25|6.28e-06	53	67	53|92	6556	13223	6556|16155	16869	16869	16869|16869	Mammalia	Chiroptera	Molossidae	Tadarida	Tadarida teniotis

## Sheet: Order-level Didelphimorphia 
DC-BLAST results for opposums (Didelphimorphia) order-level analyses.
JFD1640
subject.tax.id	Count	query.acc.ver	subject.acc.ver	X..identity	Average.X..identity	X..identity.range	evalue	Average.evalue	evalue.range	alignment.length	Average.alignment.length	alignment.length.range	query.length	Average.query.length	query.length.range	subject.length	Average.subject.length	subject.length.range	class	order	family	genus	species
867188	7	05008bca-924d-49de-b4f1-7198bcc5e84d	HM106364.1	93.013	91.9556	90|95.833	0	5.69e-11	0|3.98e-10	687	238.857	60|687	1716	3437.71	236|11888	1140	1021.86	721|1146	Mammalia	Didelphimorphia	Didelphidae	Marmosa	Marmosa robinsoni
42719	7	67b240f0-bb59-4eba-9dd5-b9550183b020	KJ868124.1	91.726	91.8223	90.265|93.878	5.27e-147	3.01e-14	5.27e-147|2.11e-13	423	209.143	49|423	584	2024.14	206|5499	15381	13347.9	1149|15381	Mammalia	Didelphimorphia	Didelphidae	Marmosa	Marmosa demerarae
42719	7	7835ff3b-9ed1-401c-9933-2940883c4d1b	KJ868124.1	92.744	91.8223	90.265|93.878	1.61e-117	3.01e-14	5.27e-147|2.11e-13	317	209.143	49|423	2007	2024.14	206|5499	15381	13347.9	1149|15381	Mammalia	Didelphimorphia	Didelphidae	Marmosa	Marmosa demerarae
867188	7	2491f2d7-6ee3-4f16-961e-706e080bee04	HM106365.1	90.994	91.9556	90|95.833	1.16e-98	5.69e-11	0|3.98e-10	322	238.857	60|687	1820	3437.71	236|11888	1146	1021.86	721|1146	Mammalia	Didelphimorphia	Didelphidae	Marmosa	Marmosa robinsoni
13616	1	9a31ed06-7cde-4b9c-a59e-705ed94736e8	AF166346.1	90.592	90.592	90.592|90.592	7.08e-93	7.08e-93	7.08e-93|7.08e-93	287	287	287|287	1382	1382	1382|1382	2611	2611	2611|2611	Mammalia	Didelphimorphia	Didelphidae	Monodelphis	Monodelphis domestica
867188	7	2c7a40b9-fbd5-4806-a3a4-f498095ac03b	MT814778.1	93.069	91.9556	90|95.833	3.54e-74	5.69e-11	0|3.98e-10	202	238.857	60|687	236	3437.71	236|11888	721	1021.86	721|1146	Mammalia	Didelphimorphia	Didelphidae	Marmosa	Marmosa robinsoni
42719	7	f413e22a-c453-40d2-be59-2528312b4196	KJ868124.1	92.611	91.8223	90.265|93.878	3.98e-68	3.01e-14	5.27e-147|2.11e-13	203	209.143	49|423	1214	2024.14	206|5499	15381	13347.9	1149|15381	Mammalia	Didelphimorphia	Didelphidae	Marmosa	Marmosa demerarae
225728	4	6814a935-1d88-4d29-8776-f618f57316ce	KT943517.1	90.043	92.0457	90.043|94.643	2.67e-66	1.51e-09	2.67e-66|5.48e-09	231	98.25	45|231	364	647.5	207|1437	16460	16460	16460|16460	Mammalia	Didelphimorphia	Didelphidae	Tlacuatzin	Tlacuatzin canescens
191870	3	e990ba8d-d4d8-46e8-9344-45614cb36bf1	NC_054268.1	91.262	92.664	91.262|94.949	5.32e-63	1.76e-18	5.32e-63|5.28e-18	206	126	73|206	3035	1230	270|3035	16336	16336	16336|16336	Mammalia	Didelphimorphia	Didelphidae	Gracilinanus	Gracilinanus agilis
42719	7	f82f01ee-03bf-4b9c-ac26-12912648aa4c	KJ868124.1	90.265	91.8223	90.265|93.878	3.77e-62	3.01e-14	5.27e-147|2.11e-13	226	209.143	49|423	5499	2024.14	206|5499	15381	13347.9	1149|15381	Mammalia	Didelphimorphia	Didelphidae	Marmosa	Marmosa demerarae
126299	1	ff3c013f-72a4-4d83-bc6b-ef9b1412bd37	HQ454276.1	91.813	91.813	91.813|91.813	5.32e-56	5.32e-56	5.32e-56|5.32e-56	171	171	171|171	2482	2482	2482|2482	402	402	402|402	Mammalia	Didelphimorphia	Didelphidae	Monodelphis	Monodelphis emiliae
42713	3	77a12b49-36ba-4a20-af24-3ff0962ac827	KJ868104.1	91.558	93.0487	90.291|97.297	5.3e-50	8.87e-10	5.3e-50|2.66e-09	154	98	37|154	798	4042.33	798|10505	15438	15438	15438|15438	Mammalia	Didelphimorphia	Didelphidae	Caluromys	Caluromys lanatus
867188	7	b72d500e-ee91-4007-9da8-858510aa421b	HM106364.1	95.833	91.9556	90|95.833	3.77e-48	5.69e-11	0|3.98e-10	120	238.857	60|687	3682	3437.71	236|11888	1140	1021.86	721|1146	Mammalia	Didelphimorphia	Didelphidae	Marmosa	Marmosa robinsoni
42719	7	be6b0dd4-402d-4d68-8fe3-53046b36ea57	KJ868124.1	90.323	91.8223	90.265|93.878	1.52e-42	3.01e-14	5.27e-147|2.11e-13	155	209.143	49|423	484	2024.14	206|5499	15381	13347.9	1149|15381	Mammalia	Didelphimorphia	Didelphidae	Marmosa	Marmosa demerarae
38620	11	89fa4ffc-34d0-40fe-9cc7-66a6607499fa	MT892667.1	90.345	92.9362	90.278|96.875	1.43e-40	3.56e-07	1.43e-40|3.84e-06	145	71.0909	32|145	2939	5444.91	849|16885	17265	17265	17265|17265	Mammalia	Didelphimorphia	Didelphidae	Lutreolina	Lutreolina crassicaudata
867188	7	795b988d-f86b-407b-8855-a1fff0d921d1	HM106362.1	90.78	91.9556	90|95.833	1.49e-40	5.69e-11	0|3.98e-10	141	238.857	60|687	11888	3437.71	236|11888	1145	1021.86	721|1146	Mammalia	Didelphimorphia	Didelphidae	Marmosa	Marmosa robinsoni
867188	7	01d84698-e6a4-44ec-8e9d-a0be54c4e0fc	HM106364.1	90	91.9556	90|95.833	1.38e-37	5.69e-11	0|3.98e-10	140	238.857	60|687	3140	3437.71	236|11888	1140	1021.86	721|1146	Mammalia	Didelphimorphia	Didelphidae	Marmosa	Marmosa robinsoni
85694	2	dc967806-c99b-47e9-955c-fffddf5e1b17	MT892662.1	91.339	94.7605	91.339|98.182	5.94e-37	2.08e-21	5.94e-37|4.15e-21	127	91	55|127	3478	2097.5	717|3478	17165	17165	17165|17165	Mammalia	Didelphimorphia	Didelphidae	Didelphis	Didelphis aurita
191870	3	410e37a6-dc15-4696-bb25-ecb6f351dffb	NC_054268.1	94.949	92.664	91.262|94.949	3.76e-36	1.76e-18	5.32e-63|5.28e-18	99	126	73|206	385	1230	270|3035	16336	16336	16336|16336	Mammalia	Didelphimorphia	Didelphidae	Gracilinanus	Gracilinanus agilis
461399	2	1b5b118a-6715-4144-a2f8-24db7c33f748	MT892663.1	90.21	93.5425	90.21|96.875	1.25e-35	7e-07	1.25e-35|1.4e-06	143	87.5	32|143	1246	3696	1246|6146	17161	17161	17161|17161	Mammalia	Didelphimorphia	Didelphidae	Didelphis	Didelphis imperfecta
42716	3	58467147-069c-41ae-8bdd-c5e4f44eb229	MT892661.1	93.269	92.1073	90.196|93.269	1.26e-32	2.47e-22	1.26e-32|7.38e-22	104	96.6667	84|104	5379	4571	950|7384	17341	17341	17341|17341	Mammalia	Didelphimorphia	Didelphidae	Didelphis	Didelphis albiventris
191871	1	d3f17506-6b85-4f47-b049-847d8cfe5354	AJ508401.2	92.593	92.593	92.593|92.593	5.69e-32	5.69e-32	5.69e-32|5.69e-32	108	108	108|108	6256	6256	6256|6256	15452	15452	15452|15452	Mammalia	Didelphimorphia	Didelphidae	Thylamys	Thylamys elegans
38620	11	dbf18857-ffdb-4834-9176-e6d5bd972470	MT892667.1	91.919	92.9362	90.278|96.875	3.01e-29	3.56e-07	1.43e-40|3.84e-06	99	71.0909	32|145	959	5444.91	849|16885	17265	17265	17265|17265	Mammalia	Didelphimorphia	Didelphidae	Lutreolina	Lutreolina crassicaudata
38620	11	02c303fb-07db-4c7c-b063-d83e75ff98fb	MT892667.1	94.253	92.9362	90.278|96.875	4.72e-29	3.56e-07	1.43e-40|3.84e-06	87	71.0909	32|145	5782	5444.91	849|16885	17265	17265	17265|17265	Mammalia	Didelphimorphia	Didelphidae	Lutreolina	Lutreolina crassicaudata
42713	3	0221cb4f-1007-4de9-be96-4fdde4b27d61	KJ868104.1	90.291	93.0487	90.291|97.297	1.52e-27	8.87e-10	5.3e-50|2.66e-09	103	98	37|154	824	4042.33	798|10505	15438	15438	15438|15438	Mammalia	Didelphimorphia	Didelphidae	Caluromys	Caluromys lanatus
42716	3	9f7377fb-ccf0-4fbc-b4ed-40bcc7cadfa7	MT892661.1	92.857	92.1073	90.196|93.269	1.58e-24	2.47e-22	1.26e-32|7.38e-22	84	96.6667	84|104	950	4571	950|7384	17341	17341	17341|17341	Mammalia	Didelphimorphia	Didelphidae	Didelphis	Didelphis albiventris
42716	3	8864cbcb-ca99-4cdd-bfcc-e1431fb240e1	MT892661.1	90.196	92.1073	90.196|93.269	7.38e-22	2.47e-22	1.26e-32|7.38e-22	102	96.6667	84|104	7384	4571	950|7384	17341	17341	17341|17341	Mammalia	Didelphimorphia	Didelphidae	Didelphis	Didelphis albiventris
42719	7	173da34a-ee6b-4094-9ee9-9bd2a9aef163	MN978623.1	91.209	91.8223	90.265|93.878	1.62e-21	3.01e-14	5.27e-147|2.11e-13	91	209.143	49|423	4175	2024.14	206|5499	1149	13347.9	1149|15381	Mammalia	Didelphimorphia	Didelphidae	Marmosa	Marmosa demerarae
85694	2	29947b62-c02e-4fd8-bb22-25b9fe130205	MT892662.1	98.182	94.7605	91.339|98.182	4.15e-21	2.08e-21	5.94e-37|4.15e-21	55	91	55|127	717	2097.5	717|3478	17165	17165	17165|17165	Mammalia	Didelphimorphia	Didelphidae	Didelphis	Didelphis aurita
38620	11	84a34066-edc3-4cc4-811e-11f046eb6483	MT892667.1	93.056	92.9362	90.278|96.875	2.47e-19	3.56e-07	1.43e-40|3.84e-06	72	71.0909	32|145	10743	5444.91	849|16885	17265	17265	17265|17265	Mammalia	Didelphimorphia	Didelphidae	Lutreolina	Lutreolina crassicaudata
38620	11	3c8b787a-229a-4c5c-8233-11c41449df64	MT892667.1	96.491	92.9362	90.278|96.875	2.92e-19	3.56e-07	1.43e-40|3.84e-06	57	71.0909	32|145	849	5444.91	849|16885	17265	17265	17265|17265	Mammalia	Didelphimorphia	Didelphidae	Lutreolina	Lutreolina crassicaudata
191870	3	35fca7cf-421d-4853-96fe-949d267a0c8b	NC_054268.1	91.781	92.664	91.262|94.949	5.28e-18	1.76e-18	5.32e-63|5.28e-18	73	126	73|206	270	1230	270|3035	16336	16336	16336|16336	Mammalia	Didelphimorphia	Didelphidae	Gracilinanus	Gracilinanus agilis
225728	4	722af9e2-d5df-42d9-8269-4463590e8e36	KT943517.1	94.643	92.0457	90.043|94.643	2.36e-16	1.51e-09	2.67e-66|5.48e-09	56	98.25	45|231	207	647.5	207|1437	16460	16460	16460|16460	Mammalia	Didelphimorphia	Didelphidae	Tlacuatzin	Tlacuatzin canescens
9267	2	fd874ca9-8803-4dbd-b83f-b53de3698f5a	Z29573.1	90.789	90.917	90.789|91.045	1.03e-15	2.75e-15	1.03e-15|4.46e-15	76	71.5	67|76	860	904.5	860|949	17084	17084	17084|17084	Mammalia	Didelphimorphia	Didelphidae	Didelphis	Didelphis virginiana
9267	2	0ffa6413-d8aa-44a5-b83e-8b3d20bfaa72	Z29573.1	91.045	90.917	90.789|91.045	4.46e-15	2.75e-15	1.03e-15|4.46e-15	67	71.5	67|76	949	904.5	860|949	17084	17084	17084|17084	Mammalia	Didelphimorphia	Didelphidae	Didelphis	Didelphis virginiana
38620	11	ff0549bc-c08e-46eb-8ea3-ba4af0d8ea0b	MT892667.1	93.443	92.9362	90.278|96.875	6.97e-15	3.56e-07	1.43e-40|3.84e-06	61	71.0909	32|145	5701	5444.91	849|16885	17265	17265	17265|17265	Mammalia	Didelphimorphia	Didelphidae	Lutreolina	Lutreolina crassicaudata
38620	11	89512033-233d-4e08-8bba-aa41591c0c7e	MT892667.1	90.278	92.9362	90.278|96.875	5.08e-14	3.56e-07	1.43e-40|3.84e-06	72	71.0909	32|145	2745	5444.91	849|16885	17265	17265	17265|17265	Mammalia	Didelphimorphia	Didelphidae	Lutreolina	Lutreolina crassicaudata
42719	7	239a5eee-2a7b-430f-a159-dc9c65c98314	KJ868124.1	93.878	91.8223	90.265|93.878	2.11e-13	3.01e-14	5.27e-147|2.11e-13	49	209.143	49|423	206	2024.14	206|5499	15381	13347.9	1149|15381	Mammalia	Didelphimorphia	Didelphidae	Marmosa	Marmosa demerarae
2588668	1	a99ed33d-70de-458d-a014-da6698ac1b90	MK817293.1	93.75	93.75	93.75|93.75	6.47e-12	6.47e-12	6.47e-12|6.47e-12	48	48	48|48	402	402	402|402	1149	1149	1149|1149	Mammalia	Didelphimorphia	Didelphidae	Metachirus	Metachirus nudicaudatus
38620	11	a9442f70-e223-4e25-abef-f2cdcede9588	MT892667.1	90.323	92.9362	90.278|96.875	1.21e-10	3.56e-07	1.43e-40|3.84e-06	62	71.0909	32|145	7240	5444.91	849|16885	17265	17265	17265|17265	Mammalia	Didelphimorphia	Didelphidae	Lutreolina	Lutreolina crassicaudata
867188	7	0a742d99-67d3-4a58-98f7-13ba076a971c	MT814778.1	90	91.9556	90|95.833	3.98e-10	5.69e-11	0|3.98e-10	60	238.857	60|687	1582	3437.71	236|11888	721	1021.86	721|1146	Mammalia	Didelphimorphia	Didelphidae	Marmosa	Marmosa robinsoni
225728	4	4ba52aba-93ca-4109-b510-1bc6884f5461	KT943517.1	90.164	92.0457	90.043|94.643	5.61e-10	1.51e-09	2.67e-66|5.48e-09	61	98.25	45|231	582	647.5	207|1437	16460	16460	16460|16460	Mammalia	Didelphimorphia	Didelphidae	Tlacuatzin	Tlacuatzin canescens
38620	11	c3db03f4-b296-4409-84ae-3b88cd93edfa	MT892667.1	93.478	92.9362	90.278|96.875	1.27e-09	3.56e-07	1.43e-40|3.84e-06	46	71.0909	32|145	1297	5444.91	849|16885	17265	17265	17265|17265	Mammalia	Didelphimorphia	Didelphidae	Lutreolina	Lutreolina crassicaudata
42713	3	9ee314e8-071a-4b5b-9a87-0fb307ca398b	KJ868104.1	97.297	93.0487	90.291|97.297	2.66e-09	8.87e-10	5.3e-50|2.66e-09	37	98	37|154	10505	4042.33	798|10505	15438	15438	15438|15438	Mammalia	Didelphimorphia	Didelphidae	Caluromys	Caluromys lanatus
225728	4	fdae2dd1-e6ff-4c69-acbd-16e1126974f8	KT943517.1	93.333	92.0457	90.043|94.643	5.48e-09	1.51e-09	2.67e-66|5.48e-09	45	98.25	45|231	1437	647.5	207|1437	16460	16460	16460|16460	Mammalia	Didelphimorphia	Didelphidae	Tlacuatzin	Tlacuatzin canescens
38620	11	515123c4-c0c7-4817-8c70-6db6a05a85fb	MT892667.1	91.837	92.9362	90.278|96.875	7.11e-08	3.56e-07	1.43e-40|3.84e-06	49	71.0909	32|145	4754	5444.91	849|16885	17265	17265	17265|17265	Mammalia	Didelphimorphia	Didelphidae	Lutreolina	Lutreolina crassicaudata
91500	1	aa57489a-d9e6-4b00-9b38-fab98bf96a46	AF128229.1	100	100	100|100	7.13e-07	7.13e-07	7.13e-07|7.13e-07	27	27	27|27	3146	3146	3146|3146	817	817	817|817	Mammalia	Didelphimorphia	Didelphidae	Chironectes	Chironectes minimus
461399	2	77188e43-fe9a-4252-972d-6110a8825a68	MT892663.1	96.875	93.5425	90.21|96.875	1.4e-06	7e-07	1.25e-35|1.4e-06	32	87.5	32|143	6146	3696	1246|6146	17161	17161	17161|17161	Mammalia	Didelphimorphia	Didelphidae	Didelphis	Didelphis imperfecta
38620	11	2f87da4d-7ece-4dd2-910e-adac98f18370	MT892667.1	96.875	92.9362	90.278|96.875	3.84e-06	3.56e-07	1.43e-40|3.84e-06	32	71.0909	32|145	16885	5444.91	849|16885	17265	17265	17265|17265	Mammalia	Didelphimorphia	Didelphidae	Lutreolina	Lutreolina crassicaudata
JFD1639
subject.tax.id	Count	query.acc.ver	subject.acc.ver	X..identity	Average.X..identity	X..identity.range	evalue	Average.evalue	evalue.range	alignment.length	Average.alignment.length	alignment.length.range	query.length	Average.query.length	query.length.range	subject.length	Average.subject.length	subject.length.range	class	order	family	genus	species
867188	6	a1b11309-884d-4d91-80a8-ab88d0ea35b3	MT814778.1	92.213	91.9135	90.909|94.355	0	5.98e-45	0|3.54e-44	732	385.833	124|737	12207	6324.67	579|12207	721	930.5	721|1140	Mammalia	Didelphimorphia	Didelphidae	Marmosa	Marmosa robinsoni
867188	6	312e936a-b939-431f-8bd6-34db749dd831	MT814778.1	90.909	91.9135	90.909|94.355	0	5.98e-45	0|3.54e-44	737	385.833	124|737	6063	6324.67	579|12207	721	930.5	721|1140	Mammalia	Didelphimorphia	Didelphidae	Marmosa	Marmosa robinsoni
13616	16	925a8d64-5760-46e8-99d2-a7184586cfd2	AF166346.1	90.701	92.2661	90.701|94.595	0	3.82e-08	0|3.56e-07	699	166.25	37|699	2305	5247.12	448|14231	2611	14366.2	2611|17079	Mammalia	Didelphimorphia	Didelphidae	Monodelphis	Monodelphis domestica
13616	16	9b3c4431-ecbe-4869-b1bd-8784a589ea85	AF166346.1	90.959	92.2661	90.701|94.595	1.08e-117	3.82e-08	0|3.56e-07	365	166.25	37|699	5197	5247.12	448|14231	2611	14366.2	2611|17079	Mammalia	Didelphimorphia	Didelphidae	Monodelphis	Monodelphis domestica
867188	6	0019d1c9-0a0e-4633-8c67-e92f4ae4de24	HM106364.1	90.986	91.9135	90.909|94.355	1.6e-114	5.98e-45	0|3.54e-44	355	385.833	124|737	579	6324.67	579|12207	1140	930.5	721|1140	Mammalia	Didelphimorphia	Didelphidae	Marmosa	Marmosa robinsoni
42719	23	88a94b6c-a469-453e-a365-c90124b6564c	KJ868124.1	90.27	91.9109	90|97.5	8.71e-109	6.05e-07	8.71e-109|7.29e-06	370	159.435	39|370	397	6836.61	397|15679	15381	14746.7	792|15381	Mammalia	Didelphimorphia	Didelphidae	Marmosa	Marmosa demerarae
42719	23	973110b8-d5d5-41df-918d-3b06f2a9eca5	AJ628384.1	91.93	91.9109	90|97.5	1.89e-101	6.05e-07	8.71e-109|7.29e-06	285	159.435	39|370	2662	6836.61	397|15679	792	14746.7	792|15381	Mammalia	Didelphimorphia	Didelphidae	Marmosa	Marmosa demerarae
225728	12	6636ced5-02ea-49aa-a36e-fbd145d65d3b	KT943517.1	92.171	92.8912	90|97.436	4.36e-96	3.37e-07	4.36e-96|2.69e-06	281	86.9167	37|281	772	4430.83	304|13863	16460	16460	16460|16460	Mammalia	Didelphimorphia	Didelphidae	Tlacuatzin	Tlacuatzin canescens
13616	16	16b7cc95-ec4f-48d7-96f1-43bdde9feabe	AJ508398.1	93.902	92.2661	90.701|94.595	9.74e-96	3.82e-08	0|3.56e-07	246	166.25	37|699	448	5247.12	448|14231	17079	14366.2	2611|17079	Mammalia	Didelphimorphia	Didelphidae	Monodelphis	Monodelphis domestica
13616	16	485fb231-619d-45f9-ac77-352d7d3f9931	AJ508398.1	93.333	92.2661	90.701|94.595	2.09e-93	3.82e-08	0|3.56e-07	255	166.25	37|699	6144	5247.12	448|14231	17079	14366.2	2611|17079	Mammalia	Didelphimorphia	Didelphidae	Monodelphis	Monodelphis domestica
13616	16	5651b1f6-d2c7-4e5e-8ccc-7f1c83e8d1b7	AF166346.1	91.697	92.2661	90.701|94.595	1.66e-91	3.82e-08	0|3.56e-07	277	166.25	37|699	2126	5247.12	448|14231	2611	14366.2	2611|17079	Mammalia	Didelphimorphia	Didelphidae	Monodelphis	Monodelphis domestica
191870	8	268e2673-5810-4a00-ab24-41799552d5b9	NC_054268.1	91.985	92.9389	90.323|96.364	1.05e-84	3.01e-08	1.05e-84|1.74e-07	262	97.25	37|262	16530	5571.38	716|16530	16336	16336	16336|16336	Mammalia	Didelphimorphia	Didelphidae	Gracilinanus	Gracilinanus agilis
126294	1	da3aaf32-071c-48e9-80bd-ecaf523d9dc0	AJ628376.1	90.262	90.262	90.262|90.262	3.59e-82	3.59e-82	3.59e-82|3.59e-82	267	267	267|267	1635	1635	1635|1635	792	792	792|792	Mammalia	Didelphimorphia	Didelphidae	Marmosa	Marmosa lepida
42719	23	c7868f07-a3ef-4c30-8110-4d10800ff4b5	KJ868124.1	91.667	91.9109	90|97.5	3.81e-71	6.05e-07	8.71e-109|7.29e-06	228	159.435	39|370	15679	6836.61	397|15679	15381	14746.7	792|15381	Mammalia	Didelphimorphia	Didelphidae	Marmosa	Marmosa demerarae
42719	23	f5b7d418-7d07-4a9c-8579-37388a6c4305	KJ868124.1	91.593	91.9109	90|97.5	1.19e-69	6.05e-07	8.71e-109|7.29e-06	226	159.435	39|370	8312	6836.61	397|15679	15381	14746.7	792|15381	Mammalia	Didelphimorphia	Didelphidae	Marmosa	Marmosa demerarae
42719	23	d55a9523-c79c-4a6c-9269-63e553fd4361	KJ868124.1	90.351	91.9109	90|97.5	2.83e-68	6.05e-07	8.71e-109|7.29e-06	228	159.435	39|370	3335	6836.61	397|15679	15381	14746.7	792|15381	Mammalia	Didelphimorphia	Didelphidae	Marmosa	Marmosa demerarae
867188	6	ac54aef9-fc9e-443f-a63e-5b54408c90a9	HM106364.1	92	91.9135	90.909|94.355	4.99e-68	5.98e-45	0|3.54e-44	200	385.833	124|737	1516	6324.67	579|12207	1140	930.5	721|1140	Mammalia	Didelphimorphia	Didelphidae	Marmosa	Marmosa robinsoni
42719	23	49e74d08-9acf-47c5-8591-c3c1c4463d26	KJ868124.1	91.071	91.9109	90|97.5	9.96e-68	6.05e-07	8.71e-109|7.29e-06	224	159.435	39|370	785	6836.61	397|15679	15381	14746.7	792|15381	Mammalia	Didelphimorphia	Didelphidae	Marmosa	Marmosa demerarae
42719	23	352a71cc-fee8-4f86-852a-a1f7c32caa22	KJ868124.1	90	91.9109	90|97.5	5.43e-66	6.05e-07	8.71e-109|7.29e-06	230	159.435	39|370	10796	6836.61	397|15679	15381	14746.7	792|15381	Mammalia	Didelphimorphia	Didelphidae	Marmosa	Marmosa demerarae
9267	12	6d603429-5579-4fac-b7c7-a73094246574	MT892666.1	90.868	91.7438	90|95	8.44e-64	3.37e-09	8.44e-64|3.73e-08	219	113.917	40|219	7274	5310.5	268|13198	17080	17081.3	17080|17084	Mammalia	Didelphimorphia	Didelphidae	Didelphis	Didelphis virginiana
42719	23	4a138856-24ce-4a02-a25e-11b511391b16	KJ868124.1	90.625	91.9109	90|97.5	1.22e-63	6.05e-07	8.71e-109|7.29e-06	224	159.435	39|370	2708	6836.61	397|15679	15381	14746.7	792|15381	Mammalia	Didelphimorphia	Didelphidae	Marmosa	Marmosa demerarae
42719	23	58201493-9532-4935-9fc3-8b658996c686	KJ868124.1	90.826	91.9109	90|97.5	1.75e-62	6.05e-07	8.71e-109|7.29e-06	218	159.435	39|370	668	6836.61	397|15679	15381	14746.7	792|15381	Mammalia	Didelphimorphia	Didelphidae	Marmosa	Marmosa demerarae
9267	12	6ec78a46-292f-4933-9939-4b770645f49f	MT892666.1	90.367	91.7438	90|95	3.27e-62	3.37e-09	8.44e-64|3.73e-08	218	113.917	40|219	4771	5310.5	268|13198	17080	17081.3	17080|17084	Mammalia	Didelphimorphia	Didelphidae	Didelphis	Didelphis virginiana
42719	23	7fd0fb9a-e1fd-4307-946e-bbc99c278746	KJ868124.1	90.222	91.9109	90|97.5	5.25e-60	6.05e-07	8.71e-109|7.29e-06	225	159.435	39|370	12936	6836.61	397|15679	15381	14746.7	792|15381	Mammalia	Didelphimorphia	Didelphidae	Marmosa	Marmosa demerarae
42719	23	d239c64e-4245-49e7-b753-f672e09497d2	KJ868124.1	90.222	91.9109	90|97.5	5.98e-60	6.05e-07	8.71e-109|7.29e-06	225	159.435	39|370	14746	6836.61	397|15679	15381	14746.7	792|15381	Mammalia	Didelphimorphia	Didelphidae	Marmosa	Marmosa demerarae
9267	12	ac4366a5-4d7f-4627-9fce-2def3dee0315	MT892666.1	90.244	91.7438	90|95	3.17e-58	3.37e-09	8.44e-64|3.73e-08	205	113.917	40|219	13198	5310.5	268|13198	17080	17081.3	17080|17084	Mammalia	Didelphimorphia	Didelphidae	Didelphis	Didelphis virginiana
461399	6	60889c71-42d8-4935-90c7-4a4e1d2af7a1	MT892663.1	90.256	91.5038	90|94.737	9.2e-54	6.98e-08	9.2e-54|2.79e-07	195	97.3333	38|195	1863	1572.5	743|2315	17161	17161	17161|17161	Mammalia	Didelphimorphia	Didelphidae	Didelphis	Didelphis imperfecta
42719	23	6018f23c-a197-437a-ad79-170c2171f132	KJ868124.1	90.526	91.9109	90|97.5	6.3e-52	6.05e-07	8.71e-109|7.29e-06	190	159.435	39|370	2154	6836.61	397|15679	15381	14746.7	792|15381	Mammalia	Didelphimorphia	Didelphidae	Marmosa	Marmosa demerarae
994805	4	6174f35e-407e-4c72-88b5-27d61f90d320	MT892665.1	90.395	90.6945	90.196|91.489	8.88e-51	2.81e-06	8.88e-51|5.61e-06	177	79.5	43|177	2001	3751.5	1638|6255	17427	17427	17427|17427	Mammalia	Didelphimorphia	Didelphidae	Didelphis	Didelphis pernigra
461399	6	e1a1bbc4-9c9f-424a-89de-083383e768c4	MT892663.1	90	91.5038	90|94.737	7.48e-49	6.98e-08	9.2e-54|2.79e-07	180	97.3333	38|195	743	1572.5	743|2315	17161	17161	17161|17161	Mammalia	Didelphimorphia	Didelphidae	Didelphis	Didelphis imperfecta
38620	34	a5210a9e-2fbe-4250-a351-e4a2ccab41ca	MT892667.1	90.566	93.2957	90.11|97.826	8.97e-49	2.28e-07	8.97e-49|2.54e-06	159	66.3824	32|159	239	5537.38	239|16610	17265	17265	17265|17265	Mammalia	Didelphimorphia	Didelphidae	Lutreolina	Lutreolina crassicaudata
225728	12	f827496b-c3bf-4ff9-9d74-cb6246ec4092	KT943517.1	91.25	92.8912	90|97.436	1.76e-47	3.37e-07	4.36e-96|2.69e-06	160	86.9167	37|281	304	4430.83	304|13863	16460	16460	16460|16460	Mammalia	Didelphimorphia	Didelphidae	Tlacuatzin	Tlacuatzin canescens
867188	6	1b7811c7-1d35-4432-8e1e-07a693153238	MT814778.1	91.018	91.9135	90.909|94.355	4.69e-46	5.98e-45	0|3.54e-44	167	385.833	124|737	7722	6324.67	579|12207	721	930.5	721|1140	Mammalia	Didelphimorphia	Didelphidae	Marmosa	Marmosa robinsoni
38620	34	c43e84c3-dc4e-4e3e-a72a-ec6ed46c883c	MT892667.1	91.139	93.2957	90.11|97.826	6.42e-46	2.28e-07	8.97e-49|2.54e-06	158	66.3824	32|159	10566	5537.38	239|16610	17265	17265	17265|17265	Mammalia	Didelphimorphia	Didelphidae	Lutreolina	Lutreolina crassicaudata
867188	6	b8759341-bd46-4c2c-9734-63858aaa53b6	HM106364.1	94.355	91.9135	90.909|94.355	3.54e-44	5.98e-45	0|3.54e-44	124	385.833	124|737	9861	6324.67	579|12207	1140	930.5	721|1140	Mammalia	Didelphimorphia	Didelphidae	Marmosa	Marmosa robinsoni
42716	11	d9bcd14c-cb56-4b2d-bdbc-404bb805a0fc	MT892661.1	90.323	93.8461	90.323|100	2.79e-42	4.22e-07	2.79e-42|3.3e-06	155	74.5455	26|155	880	3500.45	880|9405	17341	17341	17341|17341	Mammalia	Didelphimorphia	Didelphidae	Didelphis	Didelphis albiventris
191870	8	836a469b-0d37-44bb-aff1-5ddb9800cb76	NC_054268.1	91.096	92.9389	90.323|96.364	3.44e-41	3.01e-08	1.05e-84|1.74e-07	146	97.25	37|262	716	5571.38	716|16530	16336	16336	16336|16336	Mammalia	Didelphimorphia	Didelphidae	Gracilinanus	Gracilinanus agilis
867174	1	d10b2d51-5c4a-4e5b-a597-260eb5c0e866	HM106361.1	90.511	90.511	90.511|90.511	2.94e-36	2.94e-36	2.94e-36|2.94e-36	137	137	137|137	1142	1142	1142|1142	402	402	402|402	Mammalia	Didelphimorphia	Didelphidae	Marmosa	Marmosa mexicana
42716	11	95ddecb2-b6d7-4f3d-bb51-c7f5105ae96b	MT892661.1	94.949	93.8461	90.323|100	4.42e-36	4.22e-07	2.79e-42|3.3e-06	99	74.5455	26|155	6629	3500.45	880|9405	17341	17341	17341|17341	Mammalia	Didelphimorphia	Didelphidae	Didelphis	Didelphis albiventris
38620	34	92a4bee1-a2ac-4fa3-b20d-a2c64765a243	MT892667.1	93.333	93.2957	90.11|97.826	8.17e-36	2.28e-07	8.97e-49|2.54e-06	105	66.3824	32|159	820	5537.38	239|16610	17265	17265	17265|17265	Mammalia	Didelphimorphia	Didelphidae	Lutreolina	Lutreolina crassicaudata
85694	6	151a1283-50b8-484a-bbe4-3fcbaf0187ed	MT892662.1	98.75	92.9952	90.323|98.75	1.22e-35	1.37e-09	1.22e-35|6.28e-09	80	76.1667	45|122	1215	2947.17	1215|9285	17165	17165	17165|17165	Mammalia	Didelphimorphia	Didelphidae	Didelphis	Didelphis aurita
85694	6	4cec2ae4-f543-4ece-a02b-0a775fc0b298	MT892662.1	90.984	92.9952	90.323|98.75	1.89e-35	1.37e-09	1.22e-35|6.28e-09	122	76.1667	45|122	1878	2947.17	1215|9285	17165	17165	17165|17165	Mammalia	Didelphimorphia	Didelphidae	Didelphis	Didelphis aurita
13616	16	d4b41fe3-fa3b-4149-bdfa-bb05d09dc25e	AJ508398.1	91.736	92.2661	90.701|94.595	1.24e-34	3.82e-08	0|3.56e-07	121	166.25	37|699	12234	5247.12	448|14231	17079	14366.2	2611|17079	Mammalia	Didelphimorphia	Didelphidae	Monodelphis	Monodelphis domestica
42719	23	0356caad-dde8-43eb-8132-4ef07cb2cb45	KJ868124.1	94.175	91.9109	90|97.5	4.55e-34	6.05e-07	8.71e-109|7.29e-06	103	159.435	39|370	11517	6836.61	397|15679	15381	14746.7	792|15381	Mammalia	Didelphimorphia	Didelphidae	Marmosa	Marmosa demerarae
13616	16	fc43d74f-17c2-4907-850a-011a061182c3	AJ508398.1	92.523	92.2661	90.701|94.595	4.84e-32	3.82e-08	0|3.56e-07	107	166.25	37|699	5328	5247.12	448|14231	17079	14366.2	2611|17079	Mammalia	Didelphimorphia	Didelphidae	Monodelphis	Monodelphis domestica
42716	11	6676fe9c-96e8-44ec-a77a-a037fe67d358	MT892661.1	93.069	93.8461	90.323|100	3.17e-31	4.22e-07	2.79e-42|3.3e-06	101	74.5455	26|155	8955	3500.45	880|9405	17341	17341	17341|17341	Mammalia	Didelphimorphia	Didelphidae	Didelphis	Didelphis albiventris
943244	1	b23b9f97-29bb-4da0-b389-7190f5880858	HQ454250.1	90.076	90.076	90.076|90.076	3.49e-31	3.49e-31	3.49e-31|3.49e-31	131	131	131|131	2539	2539	2539|2539	402	402	402|402	Mammalia	Didelphimorphia	Didelphidae	Monodelphis	Monodelphis glirina
9267	12	3fa40b4d-641a-4619-8b6b-935d38080c32	MT892666.1	90.678	91.7438	90|95	6.33e-31	3.37e-09	8.44e-64|3.73e-08	118	113.917	40|219	4593	5310.5	268|13198	17080	17081.3	17080|17084	Mammalia	Didelphimorphia	Didelphidae	Didelphis	Didelphis virginiana
42719	23	a762640a-7e9f-48d2-8697-bd69a8c96500	KJ868124.1	94.382	91.9109	90|97.5	1.64e-30	6.05e-07	8.71e-109|7.29e-06	89	159.435	39|370	11862	6836.61	397|15679	15381	14746.7	792|15381	Mammalia	Didelphimorphia	Didelphidae	Marmosa	Marmosa demerarae
38620	34	e59b498c-6b6c-4ed2-a09c-f815431c4ffc	MT892667.1	92.157	93.2957	90.11|97.826	3.39e-30	2.28e-07	8.97e-49|2.54e-06	102	66.3824	32|159	1630	5537.38	239|16610	17265	17265	17265|17265	Mammalia	Didelphimorphia	Didelphidae	Lutreolina	Lutreolina crassicaudata
13616	16	eb116ff5-af88-4170-9215-695718981fb1	AJ508398.1	92.784	92.2661	90.701|94.595	3.87e-30	3.82e-08	0|3.56e-07	97	166.25	37|699	7199	5247.12	448|14231	17079	14366.2	2611|17079	Mammalia	Didelphimorphia	Didelphidae	Monodelphis	Monodelphis domestica
13616	16	a3b85e76-85dd-4e15-b626-e0e8872de397	AJ508398.1	92.784	92.2661	90.701|94.595	4.93e-30	3.82e-08	0|3.56e-07	97	166.25	37|699	9161	5247.12	448|14231	17079	14366.2	2611|17079	Mammalia	Didelphimorphia	Didelphidae	Monodelphis	Monodelphis domestica
9267	12	e35d9523-eae1-4cdb-8655-546fada2a27a	MT892666.1	90	91.7438	90|95	5.15e-30	3.37e-09	8.44e-64|3.73e-08	120	113.917	40|219	9570	5310.5	268|13198	17080	17081.3	17080|17084	Mammalia	Didelphimorphia	Didelphidae	Didelphis	Didelphis virginiana
9267	12	90b60acb-aba7-4acb-ad31-002e8b6dc762	Z29573.1	93.478	91.7438	90|95	3.62e-29	3.37e-09	8.44e-64|3.73e-08	92	113.917	40|219	4442	5310.5	268|13198	17084	17081.3	17080|17084	Mammalia	Didelphimorphia	Didelphidae	Didelphis	Didelphis virginiana
38620	34	ea81c6d8-f179-4b67-8077-e2252729c2d2	MT892667.1	93.333	93.2957	90.11|97.826	4.27e-29	2.28e-07	8.97e-49|2.54e-06	90	66.3824	32|159	5233	5537.38	239|16610	17265	17265	17265|17265	Mammalia	Didelphimorphia	Didelphidae	Lutreolina	Lutreolina crassicaudata
191871	2	e118a2c7-6a78-4c91-88d7-2b4b6832b208	AJ508401.2	95.062	92.5925	90.123|95.062	2.86e-28	1.55e-17	2.86e-28|3.1e-17	81	81	81|81	8995	5252	1509|8995	15452	15452	15452|15452	Mammalia	Didelphimorphia	Didelphidae	Thylamys	Thylamys elegans
225405	5	b044ccc6-6db3-44a6-ac52-58f63db62a9a	KJ868146.1	91.509	92.2086	91.228|94.186	3.04e-28	5.4e-08	3.04e-28|2.7e-07	106	70	48|106	9556	5507	607|11936	15375	15375	15375|15375	Mammalia	Didelphimorphia	Didelphidae	Philander	Philander frenatus
225405	5	d61689c7-0edc-4fa2-8f74-6cf939f7e4e0	KJ868146.1	94.186	92.2086	91.228|94.186	3.8e-28	5.4e-08	3.04e-28|2.7e-07	86	70	48|106	11936	5507	607|11936	15375	15375	15375|15375	Mammalia	Didelphimorphia	Didelphidae	Philander	Philander frenatus
867190	1	d12284c4-d591-4595-9c4a-c7c2fb988cd9	MN978608.1	91.919	91.919	91.919|91.919	1.72e-27	1.72e-27	1.72e-27|1.72e-27	99	99	99|99	250	250	250|250	1149	1149	1149|1149	Mammalia	Didelphimorphia	Didelphidae	Marmosa	Marmosa constantiae
320550	2	9f30a2a9-2c83-480f-8c38-4bc5f36c8b9c	HM583501.1	91.429	90.764	90.099|91.429	2.37e-27	6.15e-22	2.37e-27|1.23e-21	105	103	101|105	4901	8615	4901|12329	684	684	684|684	Mammalia	Didelphimorphia	Didelphidae	Gracilinanus	Gracilinanus emiliae
9267	12	550a8e1d-a4c2-4c54-90b2-c69a57f20f19	MT892666.1	90.476	91.7438	90|95	4.54e-27	3.37e-09	8.44e-64|3.73e-08	105	113.917	40|219	2426	5310.5	268|13198	17080	17081.3	17080|17084	Mammalia	Didelphimorphia	Didelphidae	Didelphis	Didelphis virginiana
191870	8	fe5e0fe7-997d-4201-93d0-c0575d5e2bb4	NC_054268.1	92.784	92.9389	90.323|96.364	7.23e-27	3.01e-08	1.05e-84|1.74e-07	97	97.25	37|262	14957	5571.38	716|16530	16336	16336	16336|16336	Mammalia	Didelphimorphia	Didelphidae	Gracilinanus	Gracilinanus agilis
38620	34	8dc9776b-fba9-4a0b-ba5b-29c69a81f0cb	MT892667.1	90.566	93.2957	90.11|97.826	1.96e-25	2.28e-07	8.97e-49|2.54e-06	106	66.3824	32|159	6874	5537.38	239|16610	17265	17265	17265|17265	Mammalia	Didelphimorphia	Didelphidae	Lutreolina	Lutreolina crassicaudata
38620	34	1b5447db-9fb7-41d9-958d-701f6cf106da	MT892667.1	91.579	93.2957	90.11|97.826	5.35e-25	2.28e-07	8.97e-49|2.54e-06	95	66.3824	32|159	4811	5537.38	239|16610	17265	17265	17265|17265	Mammalia	Didelphimorphia	Didelphidae	Lutreolina	Lutreolina crassicaudata
42719	23	b0152d1f-1e3a-4d48-bc5f-6e313fa3215e	KJ868124.1	93.902	91.9109	90|97.5	5.55e-25	6.05e-07	8.71e-109|7.29e-06	82	159.435	39|370	4989	6836.61	397|15679	15381	14746.7	792|15381	Mammalia	Didelphimorphia	Didelphidae	Marmosa	Marmosa demerarae
225728	12	692ae314-130b-42da-8bef-176f4095a466	KT943517.1	91.579	92.8912	90|97.436	4.01e-24	3.37e-07	4.36e-96|2.69e-06	95	86.9167	37|281	9248	4430.83	304|13863	16460	16460	16460|16460	Mammalia	Didelphimorphia	Didelphidae	Tlacuatzin	Tlacuatzin canescens
225729	1	12d53a09-7fc0-4227-91a8-42d950d48dfe	JQ478415.1	90.217	90.217	90.217|90.217	4.76e-24	4.76e-24	4.76e-24|4.76e-24	92	92	92|92	738	738	738|738	697	697	697|697	Mammalia	Didelphimorphia	Didelphidae	Marmosa	Marmosa paraguayana
42716	11	32ec5e32-118f-4fbf-8e99-d6011ba71b7a	MT892661.1	95.522	93.8461	90.323|100	7.29e-24	4.22e-07	2.79e-42|3.3e-06	67	74.5455	26|155	1120	3500.45	880|9405	17341	17341	17341|17341	Mammalia	Didelphimorphia	Didelphidae	Didelphis	Didelphis albiventris
225728	12	85659cca-e658-4cdf-895f-f27081a45f4c	KT943517.1	92.683	92.8912	90|97.436	7.53e-24	3.37e-07	4.36e-96|2.69e-06	82	86.9167	37|281	1157	4430.83	304|13863	16460	16460	16460|16460	Mammalia	Didelphimorphia	Didelphidae	Tlacuatzin	Tlacuatzin canescens
42716	11	4409c980-e55c-48c7-8393-be9c1d4d11ec	MT892661.1	92.941	93.8461	90.323|100	8.12e-24	4.22e-07	2.79e-42|3.3e-06	85	74.5455	26|155	1246	3500.45	880|9405	17341	17341	17341|17341	Mammalia	Didelphimorphia	Didelphidae	Didelphis	Didelphis albiventris
42719	23	4596bf4a-1836-40a7-8c61-ee1522993316	KJ868124.1	90.426	91.9109	90|97.5	2.95e-23	6.05e-07	8.71e-109|7.29e-06	94	159.435	39|370	4482	6836.61	397|15679	15381	14746.7	792|15381	Mammalia	Didelphimorphia	Didelphidae	Marmosa	Marmosa demerarae
38620	34	179a168b-9f92-4c89-9522-78a893d35d0f	MT892667.1	91.954	93.2957	90.11|97.826	1.09e-22	2.28e-07	8.97e-49|2.54e-06	87	66.3824	32|159	16610	5537.38	239|16610	17265	17265	17265|17265	Mammalia	Didelphimorphia	Didelphidae	Lutreolina	Lutreolina crassicaudata
42716	11	e3458773-eb63-4e52-9422-5587938dff28	MT892661.1	91.011	93.8461	90.323|100	9.35e-22	4.22e-07	2.79e-42|3.3e-06	89	74.5455	26|155	2412	3500.45	880|9405	17341	17341	17341|17341	Mammalia	Didelphimorphia	Didelphidae	Didelphis	Didelphis albiventris
320550	2	20f0c0c9-8302-49b4-aa72-4d8a85d57f8f	HM583501.1	90.099	90.764	90.099|91.429	1.23e-21	6.15e-22	2.37e-27|1.23e-21	101	103	101|105	12329	8615	4901|12329	684	684	684|684	Mammalia	Didelphimorphia	Didelphidae	Gracilinanus	Gracilinanus emiliae
38620	34	625bbd41-62d7-413f-aa38-4f8e2c625e83	MT892667.1	90.11	93.2957	90.11|97.826	1.9e-21	2.28e-07	8.97e-49|2.54e-06	91	66.3824	32|159	1267	5537.38	239|16610	17265	17265	17265|17265	Mammalia	Didelphimorphia	Didelphidae	Lutreolina	Lutreolina crassicaudata
191870	8	1f7c843f-acf3-4581-b996-793f73e0d21d	NC_054268.1	90.323	92.9389	90.323|96.364	2.06e-21	3.01e-08	1.05e-84|1.74e-07	93	97.25	37|262	1372	5571.38	716|16530	16336	16336	16336|16336	Mammalia	Didelphimorphia	Didelphidae	Gracilinanus	Gracilinanus agilis
85694	6	c804224c-92a8-47f2-a4bb-1a6ffcde9698	MT892662.1	90.323	92.9952	90.323|98.75	2.55e-21	1.37e-09	1.22e-35|6.28e-09	93	76.1667	45|122	1694	2947.17	1215|9285	17165	17165	17165|17165	Mammalia	Didelphimorphia	Didelphidae	Didelphis	Didelphis aurita
42719	23	b199b668-44e1-401f-95a7-0f2f494c980c	KJ868124.1	90.625	91.9109	90|97.5	5.09e-21	6.05e-07	8.71e-109|7.29e-06	96	159.435	39|370	13063	6836.61	397|15679	15381	14746.7	792|15381	Mammalia	Didelphimorphia	Didelphidae	Marmosa	Marmosa demerarae
42719	23	b6d966b5-5f90-4b00-87c1-3a9ddb445906	KJ868124.1	91.304	91.9109	90|97.5	6.06e-21	6.05e-07	8.71e-109|7.29e-06	92	159.435	39|370	15544	6836.61	397|15679	15381	14746.7	792|15381	Mammalia	Didelphimorphia	Didelphidae	Marmosa	Marmosa demerarae
225728	12	407c9602-3186-4a76-9293-a22eef11a1ee	KT943517.1	92.5	92.8912	90|97.436	6.84e-21	3.37e-07	4.36e-96|2.69e-06	80	86.9167	37|281	1169	4430.83	304|13863	16460	16460	16460|16460	Mammalia	Didelphimorphia	Didelphidae	Tlacuatzin	Tlacuatzin canescens
38620	34	f8fdb9d6-e612-4cb0-bb37-40894420a27f	MT892667.1	93.151	93.2957	90.11|97.826	1.12e-20	2.28e-07	8.97e-49|2.54e-06	73	66.3824	32|159	1909	5537.38	239|16610	17265	17265	17265|17265	Mammalia	Didelphimorphia	Didelphidae	Lutreolina	Lutreolina crassicaudata
42716	11	f69494f1-7ac8-4467-ab42-2317b062606f	MT892661.1	93.151	93.8461	90.323|100	5.56e-20	4.22e-07	2.79e-42|3.3e-06	73	74.5455	26|155	9405	3500.45	880|9405	17341	17341	17341|17341	Mammalia	Didelphimorphia	Didelphidae	Didelphis	Didelphis albiventris
9267	12	f0ed1b50-0a05-484d-a23c-6669cecb14f9	MT892666.1	92.208	91.7438	90|95	2.07e-19	3.37e-09	8.44e-64|3.73e-08	77	113.917	40|219	8975	5310.5	268|13198	17080	17081.3	17080|17084	Mammalia	Didelphimorphia	Didelphidae	Didelphis	Didelphis virginiana
38620	34	af25f287-93be-447b-b915-2300605bf0c9	MT892667.1	93.056	93.2957	90.11|97.826	3.19e-19	2.28e-07	8.97e-49|2.54e-06	72	66.3824	32|159	13826	5537.38	239|16610	17265	17265	17265|17265	Mammalia	Didelphimorphia	Didelphidae	Lutreolina	Lutreolina crassicaudata
42719	23	ac84188b-de8d-4b20-97ec-56b2c984a12f	KJ868124.1	92.105	91.9109	90|97.5	6.02e-19	6.05e-07	8.71e-109|7.29e-06	76	159.435	39|370	1731	6836.61	397|15679	15381	14746.7	792|15381	Mammalia	Didelphimorphia	Didelphidae	Marmosa	Marmosa demerarae
13616	16	1de88d24-aa0f-442d-a214-b951dcdd7de0	AJ508398.1	90.805	92.2661	90.701|94.595	7.17e-19	3.82e-08	0|3.56e-07	87	166.25	37|699	2059	5247.12	448|14231	17079	14366.2	2611|17079	Mammalia	Didelphimorphia	Didelphidae	Monodelphis	Monodelphis domestica
9267	12	6d2fbf9c-e0fe-43b0-9bad-489d6daeca01	Z29573.1	92	91.7438	90|95	1.34e-18	3.37e-09	8.44e-64|3.73e-08	75	113.917	40|219	268	5310.5	268|13198	17084	17081.3	17080|17084	Mammalia	Didelphimorphia	Didelphidae	Didelphis	Didelphis virginiana
191870	8	3a020538-3a24-4256-b16e-7cc24cbb2121	NC_054268.1	96.364	92.9389	90.323|96.364	7.77e-18	3.01e-08	1.05e-84|1.74e-07	55	97.25	37|262	5710	5571.38	716|16530	16336	16336	16336|16336	Mammalia	Didelphimorphia	Didelphidae	Gracilinanus	Gracilinanus agilis
225728	12	93742c28-79eb-4ce9-ab4c-0c5f9d3f9454	KT943517.1	90	92.8912	90|97.436	1.35e-17	3.37e-07	4.36e-96|2.69e-06	90	86.9167	37|281	2556	4430.83	304|13863	16460	16460	16460|16460	Mammalia	Didelphimorphia	Didelphidae	Tlacuatzin	Tlacuatzin canescens
38620	34	e98f8e59-bd24-490a-a87b-2cc3342b9638	MT892667.1	91.549	93.2957	90.11|97.826	1.82e-17	2.28e-07	8.97e-49|2.54e-06	71	66.3824	32|159	13369	5537.38	239|16610	17265	17265	17265|17265	Mammalia	Didelphimorphia	Didelphidae	Lutreolina	Lutreolina crassicaudata
191871	2	438bd41b-f554-4a5f-8866-da772ae6051b	AJ508401.2	90.123	92.5925	90.123|95.062	3.1e-17	1.55e-17	2.86e-28|3.1e-17	81	81	81|81	1509	5252	1509|8995	15452	15452	15452|15452	Mammalia	Didelphimorphia	Didelphidae	Thylamys	Thylamys elegans
85694	6	4d910f5f-9dcc-4fd6-9759-46ff8d0a8cac	MT892662.1	92.424	92.9952	90.323|98.75	4.93e-17	1.37e-09	1.22e-35|6.28e-09	66	76.1667	45|122	9285	2947.17	1215|9285	17165	17165	17165|17165	Mammalia	Didelphimorphia	Didelphidae	Didelphis	Didelphis aurita
38620	34	0acd09e0-784d-4d6e-be29-73a1f8cf9d57	MT892667.1	90.789	93.2957	90.11|97.826	1.01e-16	2.28e-07	8.97e-49|2.54e-06	76	66.3824	32|159	1272	5537.38	239|16610	17265	17265	17265|17265	Mammalia	Didelphimorphia	Didelphidae	Lutreolina	Lutreolina crassicaudata
38620	34	7b5fe5d2-d824-48b7-a50a-10674c30fc34	MT892667.1	92.424	93.2957	90.11|97.826	3.49e-16	2.28e-07	8.97e-49|2.54e-06	66	66.3824	32|159	1124	5537.38	239|16610	17265	17265	17265|17265	Mammalia	Didelphimorphia	Didelphidae	Lutreolina	Lutreolina crassicaudata
461399	6	3987b41e-f1db-4d7b-a8d7-be24e4baf9b4	MT892663.1	90.541	91.5038	90|94.737	2.08e-15	6.98e-08	9.2e-54|2.79e-07	74	97.3333	38|195	1708	1572.5	743|2315	17161	17161	17161|17161	Mammalia	Didelphimorphia	Didelphidae	Didelphis	Didelphis imperfecta
38620	34	d8e0b1c0-a506-435c-95c0-597e236a7113	MT892667.1	97.826	93.2957	90.11|97.826	3.05e-15	2.28e-07	8.97e-49|2.54e-06	46	66.3824	32|159	9710	5537.38	239|16610	17265	17265	17265|17265	Mammalia	Didelphimorphia	Didelphidae	Lutreolina	Lutreolina crassicaudata
38620	34	9e08a55e-a29b-43f1-8392-b6f481d00f45	MT892667.1	93.333	93.2957	90.11|97.826	3.83e-15	2.28e-07	8.97e-49|2.54e-06	60	66.3824	32|159	3145	5537.38	239|16610	17265	17265	17265|17265	Mammalia	Didelphimorphia	Didelphidae	Lutreolina	Lutreolina crassicaudata
42713	1	f47e9c5f-07da-45f8-b6ca-a41e2c4f2ef3	KJ868104.1	90	90	90|90	4.54e-15	4.54e-15	4.54e-15|4.54e-15	80	80	80|80	3719	3719	3719|3719	15438	15438	15438|15438	Mammalia	Didelphimorphia	Didelphidae	Caluromys	Caluromys lanatus
70610	1	38e4666d-7f75-4273-9dae-e2531c748c8c	AF166345.1	94.34	94.34	94.34|94.34	2.59e-14	2.59e-14	2.59e-14|2.59e-14	53	53	53|53	372	372	372|372	1586	1586	1586|1586	Mammalia	Didelphimorphia	Didelphidae	Caluromys	Caluromys philander
13616	16	28f0fa21-7dd2-4229-b6e6-2f7b9f477380	AJ508398.1	91.176	92.2661	90.701|94.595	6.78e-14	3.82e-08	0|3.56e-07	68	166.25	37|699	14231	5247.12	448|14231	17079	14366.2	2611|17079	Mammalia	Didelphimorphia	Didelphidae	Monodelphis	Monodelphis domestica
38620	34	22d8ce17-be8a-4063-8816-201aa573dfd3	MT892667.1	95.745	93.2957	90.11|97.826	4.21e-13	2.28e-07	8.97e-49|2.54e-06	47	66.3824	32|159	5825	5537.38	239|16610	17265	17265	17265|17265	Mammalia	Didelphimorphia	Didelphidae	Lutreolina	Lutreolina crassicaudata
38620	34	6fb1dfbd-b390-4651-83da-223bddde8055	MT892667.1	91.525	93.2957	90.11|97.826	1.07e-12	2.28e-07	8.97e-49|2.54e-06	59	66.3824	32|159	14801	5537.38	239|16610	17265	17265	17265|17265	Mammalia	Didelphimorphia	Didelphidae	Lutreolina	Lutreolina crassicaudata
38620	34	84e59af0-73fe-4bef-8d75-f9dc75ffaf4b	MT892667.1	97.5	93.2957	90.11|97.826	2.36e-12	2.28e-07	8.97e-49|2.54e-06	40	66.3824	32|159	2162	5537.38	239|16610	17265	17265	17265|17265	Mammalia	Didelphimorphia	Didelphidae	Lutreolina	Lutreolina crassicaudata
13616	16	74b8959e-4d54-434d-a06e-3bd5d5221b7b	AJ508398.1	90.909	92.2661	90.701|94.595	3.47e-12	3.82e-08	0|3.56e-07	66	166.25	37|699	3173	5247.12	448|14231	17079	14366.2	2611|17079	Mammalia	Didelphimorphia	Didelphidae	Monodelphis	Monodelphis domestica
9267	12	fd4b0b9f-1ee5-4e5d-bdda-87b059a5faf6	Z29573.1	94.118	91.7438	90|95	4.72e-12	3.37e-09	8.44e-64|3.73e-08	51	113.917	40|219	4308	5310.5	268|13198	17084	17081.3	17080|17084	Mammalia	Didelphimorphia	Didelphidae	Didelphis	Didelphis virginiana
9268	1	ae443505-a1e1-4f9b-be2b-593185f6bc57	MT892664.1	94	94	94|94	1.29e-11	1.29e-11	1.29e-11|1.29e-11	50	50	50|50	11729	11729	11729|11729	17157	17157	17157|17157	Mammalia	Didelphimorphia	Didelphidae	Didelphis	Didelphis marsupialis
42719	23	6f9bb321-401d-4aba-a46f-0d94fee1d253	KJ868124.1	97.5	91.9109	90|97.5	1.43e-11	6.05e-07	8.71e-109|7.29e-06	40	159.435	39|370	3344	6836.61	397|15679	15381	14746.7	792|15381	Mammalia	Didelphimorphia	Didelphidae	Marmosa	Marmosa demerarae
42716	11	20376562-b78e-4c98-bbd5-f4d9852641e6	MT892661.1	92.453	93.8461	90.323|100	1.58e-11	4.22e-07	2.79e-42|3.3e-06	53	74.5455	26|155	961	3500.45	880|9405	17341	17341	17341|17341	Mammalia	Didelphimorphia	Didelphidae	Didelphis	Didelphis albiventris
225728	12	460024ce-c7b5-41b2-9d8a-47d2d2b7ab8a	KT943517.1	97.436	92.8912	90|97.436	2.33e-11	3.37e-07	4.36e-96|2.69e-06	39	86.9167	37|281	5447	4430.83	304|13863	16460	16460	16460|16460	Mammalia	Didelphimorphia	Didelphidae	Tlacuatzin	Tlacuatzin canescens
42719	23	0ef01ac9-73ca-4d5e-8ed6-054cd12012a2	KJ868124.1	95.238	91.9109	90|97.5	2.54e-11	6.05e-07	8.71e-109|7.29e-06	42	159.435	39|370	5937	6836.61	397|15679	15381	14746.7	792|15381	Mammalia	Didelphimorphia	Didelphidae	Marmosa	Marmosa demerarae
225405	5	cd4512d6-cfeb-4382-bd0c-ee66e5dd49a9	KJ868146.1	91.228	92.2086	91.228|94.186	3.86e-11	5.4e-08	3.04e-28|2.7e-07	57	70	48|106	607	5507	607|11936	15375	15375	15375|15375	Mammalia	Didelphimorphia	Didelphidae	Philander	Philander frenatus
225405	5	dbe01b6e-0faf-4185-89e0-ff92f0028839	KJ868146.1	92.453	92.2086	91.228|94.186	5.09e-11	5.4e-08	3.04e-28|2.7e-07	53	70	48|106	798	5507	607|11936	15375	15375	15375|15375	Mammalia	Didelphimorphia	Didelphidae	Philander	Philander frenatus
38620	34	bfd8ff87-c677-4f20-abdd-a3860f0b0c3e	MT892667.1	92.453	93.2957	90.11|97.826	1.01e-10	2.28e-07	8.97e-49|2.54e-06	53	66.3824	32|159	1572	5537.38	239|16610	17265	17265	17265|17265	Mammalia	Didelphimorphia	Didelphidae	Lutreolina	Lutreolina crassicaudata
38620	34	ba9ac760-d7f4-4a21-9240-758833479447	MT892667.1	95.455	93.2957	90.11|97.826	1.21e-10	2.28e-07	8.97e-49|2.54e-06	44	66.3824	32|159	7236	5537.38	239|16610	17265	17265	17265|17265	Mammalia	Didelphimorphia	Didelphidae	Lutreolina	Lutreolina crassicaudata
225728	12	7fa3c0c3-b6aa-45e8-8419-dce58b11b498	KT943517.1	90.323	92.8912	90|97.436	1.6e-10	3.37e-07	4.36e-96|2.69e-06	62	86.9167	37|281	2476	4430.83	304|13863	16460	16460	16460|16460	Mammalia	Didelphimorphia	Didelphidae	Tlacuatzin	Tlacuatzin canescens
38620	34	c8225c19-8dcf-43e9-bb13-009cf1045aaa	MT892667.1	90.476	93.2957	90.11|97.826	1.98e-10	2.28e-07	8.97e-49|2.54e-06	63	66.3824	32|159	3057	5537.38	239|16610	17265	17265	17265|17265	Mammalia	Didelphimorphia	Didelphidae	Lutreolina	Lutreolina crassicaudata
38620	34	e2148d67-635b-4cf4-a63f-32450ffb3c57	MT892667.1	90.909	93.2957	90.11|97.826	5.64e-10	2.28e-07	8.97e-49|2.54e-06	55	66.3824	32|159	2236	5537.38	239|16610	17265	17265	17265|17265	Mammalia	Didelphimorphia	Didelphidae	Lutreolina	Lutreolina crassicaudata
38620	34	efab9695-af17-4357-af8d-10729becf6e3	MT892667.1	97.297	93.2957	90.11|97.826	6.05e-10	2.28e-07	8.97e-49|2.54e-06	37	66.3824	32|159	2402	5537.38	239|16610	17265	17265	17265|17265	Mammalia	Didelphimorphia	Didelphidae	Lutreolina	Lutreolina crassicaudata
38620	34	4346dff2-b56d-4b31-a050-79cc533f6371	MT892667.1	97.297	93.2957	90.11|97.826	6.79e-10	2.28e-07	8.97e-49|2.54e-06	37	66.3824	32|159	2694	5537.38	239|16610	17265	17265	17265|17265	Mammalia	Didelphimorphia	Didelphidae	Lutreolina	Lutreolina crassicaudata
13616	16	aeb1c51e-df34-4499-8995-c282c0e9710d	AJ508398.1	92.308	92.2661	90.701|94.595	9.74e-10	3.82e-08	0|3.56e-07	52	166.25	37|699	3856	5247.12	448|14231	17079	14366.2	2611|17079	Mammalia	Didelphimorphia	Didelphidae	Monodelphis	Monodelphis domestica
38620	34	21b7727c-3674-4a85-8549-41d5494f8ade	MT892667.1	95.238	93.2957	90.11|97.826	1.45e-09	2.28e-07	8.97e-49|2.54e-06	42	66.3824	32|159	5716	5537.38	239|16610	17265	17265	17265|17265	Mammalia	Didelphimorphia	Didelphidae	Lutreolina	Lutreolina crassicaudata
38620	34	6fef19d1-11f1-4f1f-9b49-42f5ff7c662c	MT892667.1	95.122	93.2957	90.11|97.826	1.9e-09	2.28e-07	8.97e-49|2.54e-06	41	66.3824	32|159	7513	5537.38	239|16610	17265	17265	17265|17265	Mammalia	Didelphimorphia	Didelphidae	Lutreolina	Lutreolina crassicaudata
85694	6	60dca993-8a1d-4894-ae0c-abfb1b016fe9	MT892662.1	92.157	92.9952	90.323|98.75	1.93e-09	1.37e-09	1.22e-35|6.28e-09	51	76.1667	45|122	1965	2947.17	1215|9285	17165	17165	17165|17165	Mammalia	Didelphimorphia	Didelphidae	Didelphis	Didelphis aurita
9267	12	d8b97757-3097-4748-aa26-ca6239aa0a4b	MT892666.1	95	91.7438	90|95	3.19e-09	3.37e-09	8.44e-64|3.73e-08	40	113.917	40|219	3248	5310.5	268|13198	17080	17081.3	17080|17084	Mammalia	Didelphimorphia	Didelphidae	Didelphis	Didelphis virginiana
461399	6	ae03a1e9-0a37-4a56-a4cd-dbb8cce9ef72	MT892663.1	92	91.5038	90|94.737	5.97e-09	6.98e-08	9.2e-54|2.79e-07	50	97.3333	38|195	1564	1572.5	743|2315	17161	17161	17161|17161	Mammalia	Didelphimorphia	Didelphidae	Didelphis	Didelphis imperfecta
85694	6	0e9fd6b6-b0f7-4ffb-af2a-cb1f3b9517af	MT892662.1	93.333	92.9952	90.323|98.75	6.28e-09	1.37e-09	1.22e-35|6.28e-09	45	76.1667	45|122	1646	2947.17	1215|9285	17165	17165	17165|17165	Mammalia	Didelphimorphia	Didelphidae	Didelphis	Didelphis aurita
225728	12	9b88a4c3-986f-469b-a4b8-fb67e23ad64f	KT943517.1	94.737	92.8912	90|97.436	7.43e-09	3.37e-07	4.36e-96|2.69e-06	38	86.9167	37|281	1944	4430.83	304|13863	16460	16460	16460|16460	Mammalia	Didelphimorphia	Didelphidae	Tlacuatzin	Tlacuatzin canescens
191870	8	12238301-791d-4523-bc02-5d51e546ad0e	NC_054268.1	93.182	92.9389	90.323|96.364	3.21e-08	3.01e-08	1.05e-84|1.74e-07	44	97.25	37|262	2155	5571.38	716|16530	16336	16336	16336|16336	Mammalia	Didelphimorphia	Didelphidae	Gracilinanus	Gracilinanus agilis
191870	8	a132aeb9-f7c3-44fc-b0b3-c9fe5ee9a49d	NC_054268.1	93.182	92.9389	90.323|96.364	3.5e-08	3.01e-08	1.05e-84|1.74e-07	44	97.25	37|262	2349	5571.38	716|16530	16336	16336	16336|16336	Mammalia	Didelphimorphia	Didelphidae	Gracilinanus	Gracilinanus agilis
9267	12	5fb6e64e-77e6-4e4e-9d3c-c0a0bae8abd5	Z29573.1	91.489	91.7438	90|95	3.73e-08	3.37e-09	8.44e-64|3.73e-08	47	113.917	40|219	653	5310.5	268|13198	17084	17081.3	17080|17084	Mammalia	Didelphimorphia	Didelphidae	Didelphis	Didelphis virginiana
13616	16	a7156f39-c8aa-4e1e-b679-33e3d38c7cd4	AJ508398.1	94.595	92.2661	90.701|94.595	6.85e-08	3.82e-08	0|3.56e-07	37	166.25	37|699	1188	5247.12	448|14231	17079	14366.2	2611|17079	Mammalia	Didelphimorphia	Didelphidae	Monodelphis	Monodelphis domestica
994805	4	7134efcb-a155-49b9-94ff-d4ff01bf5b15	MT892665.1	91.489	90.6945	90.196|91.489	7.64e-08	2.81e-06	8.88e-51|5.61e-06	47	79.5	43|177	5112	3751.5	1638|6255	17427	17427	17427|17427	Mammalia	Didelphimorphia	Didelphidae	Didelphis	Didelphis pernigra
42716	11	e83552aa-6a6a-41cd-b3bc-53d0ae325eed	MT892661.1	94.444	93.8461	90.323|100	1.01e-07	4.22e-07	2.79e-42|3.3e-06	36	74.5455	26|155	1750	3500.45	880|9405	17341	17341	17341|17341	Mammalia	Didelphimorphia	Didelphidae	Didelphis	Didelphis albiventris
38620	34	1cdda106-6006-4592-81b3-0ea738d94fd7	MT892667.1	96.97	93.2957	90.11|97.826	1.12e-07	2.28e-07	8.97e-49|2.54e-06	33	66.3824	32|159	1923	5537.38	239|16610	17265	17265	17265|17265	Mammalia	Didelphimorphia	Didelphidae	Lutreolina	Lutreolina crassicaudata
461399	6	b23921bf-d014-46e9-8e29-3fdb9fadbc03	MT892663.1	94.737	91.5038	90|94.737	1.34e-07	6.98e-08	9.2e-54|2.79e-07	38	97.3333	38|195	2315	1572.5	743|2315	17161	17161	17161|17161	Mammalia	Didelphimorphia	Didelphidae	Didelphis	Didelphis imperfecta
191870	8	b3e0f7e6-2885-4c17-8727-d53ec2080aff	NC_054268.1	94.595	92.9389	90.323|96.364	1.74e-07	3.01e-08	1.05e-84|1.74e-07	37	97.25	37|262	782	5571.38	716|16530	16336	16336	16336|16336	Mammalia	Didelphimorphia	Didelphidae	Gracilinanus	Gracilinanus agilis
13616	16	3dda3470-ca7a-487a-980f-585323586514	AJ508398.1	93.023	92.2661	90.701|94.595	1.86e-07	3.82e-08	0|3.56e-07	43	166.25	37|699	3193	5247.12	448|14231	17079	14366.2	2611|17079	Mammalia	Didelphimorphia	Didelphidae	Monodelphis	Monodelphis domestica
225405	5	428ec5e7-77a5-424c-b518-d968389e915d	KJ868146.1	91.667	92.2086	91.228|94.186	2.7e-07	5.4e-08	3.04e-28|2.7e-07	48	70	48|106	4638	5507	607|11936	15375	15375	15375|15375	Mammalia	Didelphimorphia	Didelphidae	Philander	Philander frenatus
38620	34	e8804df5-471b-4c10-9c88-965a576f7a0e	MT892667.1	96.875	93.2957	90.11|97.826	2.78e-07	2.28e-07	8.97e-49|2.54e-06	32	66.3824	32|159	1235	5537.38	239|16610	17265	17265	17265|17265	Mammalia	Didelphimorphia	Didelphidae	Lutreolina	Lutreolina crassicaudata
461399	6	89ebce30-d52e-409c-a270-4bf5ccee1ac4	MT892663.1	91.489	91.5038	90|94.737	2.79e-07	6.98e-08	9.2e-54|2.79e-07	47	97.3333	38|195	1242	1572.5	743|2315	17161	17161	17161|17161	Mammalia	Didelphimorphia	Didelphidae	Didelphis	Didelphis imperfecta
13616	16	a5a380cc-1671-430c-b842-28b40640a99d	AJ508398.1	93.023	92.2661	90.701|94.595	3.56e-07	3.82e-08	0|3.56e-07	43	166.25	37|699	6112	5247.12	448|14231	17079	14366.2	2611|17079	Mammalia	Didelphimorphia	Didelphidae	Monodelphis	Monodelphis domestica
225728	12	d23695cc-31ea-42c1-90d6-f74d5e7d66c7	KT943517.1	94.595	92.8912	90|97.436	5.37e-07	3.37e-07	4.36e-96|2.69e-06	37	86.9167	37|281	2376	4430.83	304|13863	16460	16460	16460|16460	Mammalia	Didelphimorphia	Didelphidae	Tlacuatzin	Tlacuatzin canescens
38620	34	d4f3a89b-9f15-4323-a2fa-b219d3c168fe	MT892667.1	90.196	93.2957	90.11|97.826	6.85e-07	2.28e-07	8.97e-49|2.54e-06	51	66.3824	32|159	11745	5537.38	239|16610	17265	17265	17265|17265	Mammalia	Didelphimorphia	Didelphidae	Lutreolina	Lutreolina crassicaudata
225728	12	f74962a6-228e-42e8-abef-4be88e517a24	KT943517.1	94.737	92.8912	90|97.436	8.09e-07	3.37e-07	4.36e-96|2.69e-06	38	86.9167	37|281	13863	4430.83	304|13863	16460	16460	16460|16460	Mammalia	Didelphimorphia	Didelphidae	Tlacuatzin	Tlacuatzin canescens
38620	34	6ae54258-2d1a-47a3-8998-0caca23c2e3f	MT892667.1	90.385	93.2957	90.11|97.826	8.38e-07	2.28e-07	8.97e-49|2.54e-06	52	66.3824	32|159	14368	5537.38	239|16610	17265	17265	17265|17265	Mammalia	Didelphimorphia	Didelphidae	Lutreolina	Lutreolina crassicaudata
42716	11	1a99736f-2e8e-4816-a89f-7db8475228fb	MT892661.1	100	93.8461	90.323|100	1.24e-06	4.22e-07	2.79e-42|3.3e-06	26	74.5455	26|155	1409	3500.45	880|9405	17341	17341	17341|17341	Mammalia	Didelphimorphia	Didelphidae	Didelphis	Didelphis albiventris
38620	34	6c982461-f5f7-4877-99f7-d17257401aac	MT892667.1	92.857	93.2957	90.11|97.826	1.46e-06	2.28e-07	8.97e-49|2.54e-06	42	66.3824	32|159	6440	5537.38	239|16610	17265	17265	17265|17265	Mammalia	Didelphimorphia	Didelphidae	Lutreolina	Lutreolina crassicaudata
38620	34	24d0a2c1-0c3a-45fc-a70f-bd852577a201	MT892667.1	94.444	93.2957	90.11|97.826	1.82e-06	2.28e-07	8.97e-49|2.54e-06	36	66.3824	32|159	2067	5537.38	239|16610	17265	17265	17265|17265	Mammalia	Didelphimorphia	Didelphidae	Lutreolina	Lutreolina crassicaudata
38620	34	808d3adb-56d7-41e0-b999-bd22a77e8165	MT892667.1	94.444	93.2957	90.11|97.826	2.54e-06	2.28e-07	8.97e-49|2.54e-06	36	66.3824	32|159	2874	5537.38	239|16610	17265	17265	17265|17265	Mammalia	Didelphimorphia	Didelphidae	Lutreolina	Lutreolina crassicaudata
225728	12	00eea65c-264b-4785-85c6-a8f3653cbce1	KT943517.1	92.683	92.8912	90|97.436	2.69e-06	3.37e-07	4.36e-96|2.69e-06	41	86.9167	37|281	11858	4430.83	304|13863	16460	16460	16460|16460	Mammalia	Didelphimorphia	Didelphidae	Tlacuatzin	Tlacuatzin canescens
42716	11	f7c63f61-1f7b-42ee-b4e0-7b10729eb5b1	MT892661.1	94.444	93.8461	90.323|100	3.3e-06	4.22e-07	2.79e-42|3.3e-06	36	74.5455	26|155	3738	3500.45	880|9405	17341	17341	17341|17341	Mammalia	Didelphimorphia	Didelphidae	Didelphis	Didelphis albiventris
994805	4	6f43d562-1a94-4261-a760-c1c57a66607b	MT892665.1	90.196	90.6945	90.196|91.489	5.54e-06	2.81e-06	8.88e-51|5.61e-06	51	79.5	43|177	6255	3751.5	1638|6255	17427	17427	17427|17427	Mammalia	Didelphimorphia	Didelphidae	Didelphis	Didelphis pernigra
994805	4	6b7bd6e9-c1c0-4a4e-b7b0-22a264e33fc4	MT892665.1	90.698	90.6945	90.196|91.489	5.61e-06	2.81e-06	8.88e-51|5.61e-06	43	79.5	43|177	1638	3751.5	1638|6255	17427	17427	17427|17427	Mammalia	Didelphimorphia	Didelphidae	Didelphis	Didelphis pernigra
42719	23	14d517ec-941c-41ab-9f23-d02f8db24da0	KJ868124.1	92.683	91.9109	90|97.5	6.62e-06	6.05e-07	8.71e-109|7.29e-06	41	159.435	39|370	7471	6836.61	397|15679	15381	14746.7	792|15381	Mammalia	Didelphimorphia	Didelphidae	Marmosa	Marmosa demerarae
42719	23	d7e49d0c-9425-4abe-839a-b981a75cbeb1	KJ868124.1	92.308	91.9109	90|97.5	7.29e-06	6.05e-07	8.71e-109|7.29e-06	39	159.435	39|370	2124	6836.61	397|15679	15381	14746.7	792|15381	Mammalia	Didelphimorphia	Didelphidae	Marmosa	Marmosa demerarae

## Sheet: Family-level Cricetidae
DC-BLAST results for rodents (Cricetidae) family-level analyses.
JFD1615
subject.tax.id	Count	query.acc.ver	subject.acc.ver	X..identity	Average.X..identity	X..identity.range	evalue	Average.evalue	evalue.range	alignment.length	Average.alignment.length	alignment.length.range	query.length	Average.query.length	query.length.range	subject.length	Average.subject.length	subject.length.range	class	order	family	genus	species
530178	6	3ee73814-a47a-473e-884b-b5d83ff1d1f9	MZ364418.1	96.39	94.2007	91.501|96.39	0	4.06667e-14	0|2.44e-13	554	387.5	48|655	773	3075.5	773|11313	658	712.167	384|1325	Mammalia	Rodentia	Cricetidae	Nephelomys	Nephelomys albigularis
1734924	21	f72885e0-ad3c-482c-bf11-f4b1e1dcfa20	MN547688.1	95.152	92.845	90.126|95.152	0	8.95238e-78	0|1.88e-76	1155	687.238	216|1167	6928	3471.38	387|16151	1149	830.714	592|1149	Mammalia	Rodentia	Cricetidae	Nephelomys	Nephelomys devius
1734924	21	924db275-3e96-4408-98f9-154af20af670	MN547688.1	95.142	92.845	90.126|95.152	0	8.95238e-78	0|1.88e-76	988	687.238	216|1167	4287	3471.38	387|16151	1149	830.714	592|1149	Mammalia	Rodentia	Cricetidae	Nephelomys	Nephelomys devius
1734924	21	e00ce4c9-2a53-4059-be4d-4d66f2882655	MN547688.1	94.212	92.845	90.126|95.152	0	8.95238e-78	0|1.88e-76	812	687.238	216|1167	7151	3471.38	387|16151	1149	830.714	592|1149	Mammalia	Rodentia	Cricetidae	Nephelomys	Nephelomys devius
1734924	21	f6bf4db3-57c8-4b1d-9eda-8a5141c62382	MN547688.1	94.041	92.845	90.126|95.152	0	8.95238e-78	0|1.88e-76	537	687.238	216|1167	3461	3471.38	387|16151	1149	830.714	592|1149	Mammalia	Rodentia	Cricetidae	Nephelomys	Nephelomys devius
1734924	21	84ef6bba-2d2e-4c03-bb96-f952924466c3	MN547688.1	93.809	92.845	90.126|95.152	0	8.95238e-78	0|1.88e-76	1163	687.238	216|1167	16151	3471.38	387|16151	1149	830.714	592|1149	Mammalia	Rodentia	Cricetidae	Nephelomys	Nephelomys devius
1734924	21	24767208-0c7d-4884-bbc7-e7c8fb5147dd	MN547688.1	93.46	92.845	90.126|95.152	0	8.95238e-78	0|1.88e-76	1162	687.238	216|1167	3946	3471.38	387|16151	1149	830.714	592|1149	Mammalia	Rodentia	Cricetidae	Nephelomys	Nephelomys devius
2964401	1	63fb5581-6bd8-4453-a682-24fd21bc755d	MZ364464.1	93.455	93.455	93.455|93.455	0	0	0|0	550	550	550|550	2892	2892	2892|2892	544	544	544|544	Mammalia	Rodentia	Cricetidae	Nephelomys	Nephelomys childi
1734924	21	511eed02-7f29-4032-b3c7-50015f495861	MN547700.1	93.402	92.845	90.126|95.152	0	8.95238e-78	0|1.88e-76	1167	687.238	216|1167	13987	3471.38	387|16151	1149	830.714	592|1149	Mammalia	Rodentia	Cricetidae	Nephelomys	Nephelomys devius
530178	6	47ed31de-20db-4117-bbfd-ce36d1e1e15b	MZ364418.1	92.977	94.2007	91.501|96.39	0	4.06667e-14	0|2.44e-13	655	387.5	48|655	2527	3075.5	773|11313	658	712.167	384|1325	Mammalia	Rodentia	Cricetidae	Nephelomys	Nephelomys albigularis
1734924	21	865ab8f7-e911-4e21-be61-8cc5a43818a7	KP778620.1	92.842	92.845	90.126|95.152	0	8.95238e-78	0|1.88e-76	475	687.238	216|1167	1104	3471.38	387|16151	592	830.714	592|1149	Mammalia	Rodentia	Cricetidae	Nephelomys	Nephelomys devius
1734924	21	5fb1558b-0ffc-47d6-9a5d-8422a65217d1	MN547688.1	92.564	92.845	90.126|95.152	0	8.95238e-78	0|1.88e-76	659	687.238	216|1167	685	3471.38	387|16151	1149	830.714	592|1149	Mammalia	Rodentia	Cricetidae	Nephelomys	Nephelomys devius
1734924	21	0af9f6ac-bbc9-4dd5-9b53-47c2e4b0dbd8	KP778620.1	92.549	92.845	90.126|95.152	0	8.95238e-78	0|1.88e-76	510	687.238	216|1167	1138	3471.38	387|16151	592	830.714	592|1149	Mammalia	Rodentia	Cricetidae	Nephelomys	Nephelomys devius
1734924	21	5ce073ec-8d8b-4cfa-811a-5bb2cb9d2c03	KP778620.1	92.545	92.845	90.126|95.152	0	8.95238e-78	0|1.88e-76	550	687.238	216|1167	1194	3471.38	387|16151	592	830.714	592|1149	Mammalia	Rodentia	Cricetidae	Nephelomys	Nephelomys devius
1734924	21	688aaddb-8e1e-41c5-992c-78d6a13fb6ad	KP778620.1	92.224	92.845	90.126|95.152	0	8.95238e-78	0|1.88e-76	553	687.238	216|1167	1063	3471.38	387|16151	592	830.714	592|1149	Mammalia	Rodentia	Cricetidae	Nephelomys	Nephelomys devius
1734924	21	06217830-5a99-4ce4-8950-96ed901e7c76	KP778654.1	92.157	92.845	90.126|95.152	0	8.95238e-78	0|1.88e-76	510	687.238	216|1167	1046	3471.38	387|16151	592	830.714	592|1149	Mammalia	Rodentia	Cricetidae	Nephelomys	Nephelomys devius
1734924	21	3e57e243-6dc3-4a5d-baf9-be3331de440d	KP778620.1	92.058	92.845	90.126|95.152	0	8.95238e-78	0|1.88e-76	554	687.238	216|1167	1221	3471.38	387|16151	592	830.714	592|1149	Mammalia	Rodentia	Cricetidae	Nephelomys	Nephelomys devius
1734924	21	9d8159c9-c6d3-403b-ac29-fd8512894561	MN547688.1	91.701	92.845	90.126|95.152	0	8.95238e-78	0|1.88e-76	976	687.238	216|1167	4225	3471.38	387|16151	1149	830.714	592|1149	Mammalia	Rodentia	Cricetidae	Nephelomys	Nephelomys devius
1734924	21	9b2d595a-c9b8-4d6f-83be-817e49f30596	KP778620.1	90.96	92.845	90.126|95.152	0	8.95238e-78	0|1.88e-76	531	687.238	216|1167	927	3471.38	387|16151	592	830.714	592|1149	Mammalia	Rodentia	Cricetidae	Nephelomys	Nephelomys devius
1734924	21	44f53a99-a41d-4bc2-9a5b-a5cdc44661c3	KP778620.1	90.126	92.845	90.126|95.152	1.63e-180	8.95238e-78	0|1.88e-76	557	687.238	216|1167	1142	3471.38	387|16151	592	830.714	592|1149	Mammalia	Rodentia	Cricetidae	Nephelomys	Nephelomys devius
1734924	21	dbdb1cb4-8c65-4ea6-b307-83e5a9c7b20a	KP778654.1	94.377	92.845	90.126|95.152	6.39e-173	8.95238e-78	0|1.88e-76	409	687.238	216|1167	940	3471.38	387|16151	592	830.714	592|1149	Mammalia	Rodentia	Cricetidae	Nephelomys	Nephelomys devius
1734924	21	dfa32d51-c20e-442a-be47-b2aead04572a	KP778620.1	90.149	92.845	90.126|95.152	7.18e-173	8.95238e-78	0|1.88e-76	538	687.238	216|1167	1054	3471.38	387|16151	592	830.714	592|1149	Mammalia	Rodentia	Cricetidae	Nephelomys	Nephelomys devius
1734924	21	152c7bd8-52d9-4aef-8889-1b0dc0d28554	KP778481.1	94.146	92.845	90.126|95.152	2.28e-172	8.95238e-78	0|1.88e-76	410	687.238	216|1167	862	3471.38	387|16151	592	830.714	592|1149	Mammalia	Rodentia	Cricetidae	Nephelomys	Nephelomys devius
530178	6	33cf6bd1-ec64-4508-9278-4c7fb5a8719e	JF693848.1	92.784	94.2007	91.501|96.39	3.68e-151	4.06667e-14	0|2.44e-13	388	387.5	48|655	11313	3075.5	773|11313	384	712.167	384|1325	Mammalia	Rodentia	Cricetidae	Nephelomys	Nephelomys albigularis
530178	6	e75cc1ad-cccf-4d7e-8904-71416b7c5baa	MZ364418.1	95.719	94.2007	91.501|96.39	2.77e-147	4.06667e-14	0|2.44e-13	327	387.5	48|655	1618	3075.5	773|11313	658	712.167	384|1325	Mammalia	Rodentia	Cricetidae	Nephelomys	Nephelomys albigularis
2904038	1	e1c7ab94-7b80-4374-96b1-ad15d03f4a01	MZ736555.1	91.033	91.033	91.033|91.033	6.46e-118	0	6.46e-118|6.46e-118	368	368	368|368	16670	16670	16670|16670	801	801	801|801	Mammalia	Rodentia	Cricetidae	Nephelomys	Nephelomys ricardopalmai
530178	6	cff063ec-3ae2-4f2d-9c82-bded2f55de75	U83820.1	91.501	94.2007	91.501|96.39	4.75e-112	4.06667e-14	0|2.44e-13	353	387.5	48|655	1017	3075.5	773|11313	1325	712.167	384|1325	Mammalia	Rodentia	Cricetidae	Nephelomys	Nephelomys albigularis
530172	1	75b4cc56-9a7c-4f62-8abf-b6d6140e73a6	KP778473.1	91.9	91.9	91.9|91.9	7.79e-108	0	7.79e-108|7.79e-108	321	321	321|321	1221	1221	1221|1221	610	610	610|610	Mammalia	Rodentia	Cricetidae	Handleyomys	Handleyomys rostratus
1734924	21	c84c5c96-7916-4521-a243-2cd4ef98c2e6	KP778481.1	92.13	92.845	90.126|95.152	1.88e-76	8.95238e-78	0|1.88e-76	216	687.238	216|1167	387	3471.38	387|16151	592	830.714	592|1149	Mammalia	Rodentia	Cricetidae	Nephelomys	Nephelomys devius
530184	1	881b3b01-48f3-46f2-9fe7-c33c3910d144	MZ364477.1	98.113	98.113	98.113|98.113	2.77e-47	2.77e-47	2.77e-47|2.77e-47	106	106	106|106	641	641	641|641	546	546	546|546	Mammalia	Rodentia	Cricetidae	Transandinomys	Transandinomys talamancae
89098	3	02af005a-5838-4eeb-b710-334f8a509540	OL685394.1	91.304	91.916	90|94.444	1.62e-40	1.22333e-09	1.62e-40|3.67e-09	138	84	54|138	316	834.667	316|1325	16358	16358	16358|16358	Mammalia	Rodentia	Cricetidae	Holochilus	Holochilus sciureus
322708	1	fea2d9d7-7550-4bd0-aa8e-0e4073e4aa6f	DQ138954.1	93.162	93.162	93.162|93.162	7.77e-37	7.77e-37	7.77e-37|7.77e-37	117	117	117|117	426	426	426|426	1494	1494	1494|1494	Mammalia	Rodentia	Cricetidae	Peromyscus	Peromyscus perfulvus
685891	1	cb10d364-8d87-41a8-a5c6-9c8fdfbf4329	MT492448.1	91.129	91.129	91.129|91.129	2.14e-31	2.14e-31	2.14e-31|2.14e-31	124	124	124|124	8266	8266	8266|8266	16354	16354	16354|16354	Mammalia	Rodentia	Cricetidae	Eolagurus	Eolagurus luteus
105199	1	47c9f2ab-7ba0-4a0a-b48d-75a8d14878e8	NC_033356.1	94.048	94.048	94.048|94.048	1.66e-26	1.66e-26	1.66e-26|1.66e-26	84	84	84|84	814	814	814|814	16294	16294	16294|16294	Mammalia	Rodentia	Cricetidae	Neotoma	Neotoma fuscipes
870527	1	bc10a46d-8a5e-49ec-a136-b32264d07505	ON165359.1	96.667	96.667	96.667|96.667	1.14e-21	1.14e-21	1.14e-21|1.14e-21	60	60	60|60	282	282	282|282	15902	15902	15902|15902	Mammalia	Rodentia	Cricetidae	Eothenomys	Eothenomys eva
89150	1	9a94a1da-c789-42bc-bdac-7243ba910978	KY707307.1	92.683	92.683	92.683|92.683	1.18e-21	1.18e-21	1.18e-21|1.18e-21	82	82	82|82	1082	1082	1082|1082	16606	16606	16606|16606	Mammalia	Rodentia	Cricetidae	Reithrodontomys	Reithrodontomys mexicanus
89098	3	e5876464-bf25-4e31-8774-cbd79a411720	OL685394.1	94.444	91.916	90|94.444	2.94e-15	1.22333e-09	1.62e-40|3.67e-09	54	84	54|138	863	834.667	316|1325	16358	16358	16358|16358	Mammalia	Rodentia	Cricetidae	Holochilus	Holochilus sciureus
530178	6	8080b5bb-56a6-4401-9cd6-648e5e9199ef	KP778483.1	95.833	94.2007	91.501|96.39	2.44e-13	4.06667e-14	0|2.44e-13	48	387.5	48|655	1205	3075.5	773|11313	590	712.167	384|1325	Mammalia	Rodentia	Cricetidae	Nephelomys	Nephelomys albigularis
38668	1	50249fa2-9b3b-4bdb-b745-c76f8adcdbc5	KU168563.1	100	100	100|100	1.97e-09	1.97e-09	1.97e-09|1.97e-09	32	32	32|32	720	720	720|720	16370	16370	16370|16370	Mammalia	Rodentia	Cricetidae	Onychomys	Onychomys leucogaster
89098	3	31bd9381-b75b-48ea-b7e2-0f31adf8f5aa	OL685394.1	90	91.916	90|94.444	3.67e-09	1.22333e-09	1.62e-40|3.67e-09	60	84	54|138	1325	834.667	316|1325	16358	16358	16358|16358	Mammalia	Rodentia	Cricetidae	Holochilus	Holochilus sciureus
329624	1	19f4a35c-b16c-424a-bce9-a5240558c9b3	AY997821.1	94.737	94.737	94.737|94.737	1.72e-06	1.72e-06	1.72e-06|1.72e-06	38	38	38|38	10409	10409	10409|10409	887	887	887|887	Mammalia	Rodentia	Cricetidae	Mesocricetus	Mesocricetus newtoni
JFD1588
subject.tax.id	Count	query.acc.ver	subject.acc.ver	X..identity	Average.X..identity	X..identity.range	evalue	Average.evalue	evalue.range	alignment.length	Average.alignment.length	alignment.length.range	query.length	Average.query.length	query.length.range	subject.length	Average.subject.length	subject.length.range	class	order	family	genus	species
530171	10	c383aa32-f54c-4d06-b9d8-2e1206133a8f	KP778263.1	96.197	92.7066	90.442|96.197	0	1.74e-77	0|1.74e-76	1157	553.3	185|1157	16376	3566.7	360|16376	1143	865.9	549|1143	Mammalia	Rodentia	Cricetidae	Handleyomys	Handleyomys alfaroi
530171	10	88741345-ab7d-4a04-9318-392c057fc06a	MZ364443.1	92.487	92.7066	90.442|96.197	0	1.74e-77	0|1.74e-76	559	553.3	185|1157	5385	3566.7	360|16376	549	865.9	549|1143	Mammalia	Rodentia	Cricetidae	Handleyomys	Handleyomys alfaroi
530171	10	b3a76666-66d2-462b-866b-5f8971d19313	KP778263.1	91.766	92.7066	90.442|96.197	0	1.74e-77	0|1.74e-76	668	553.3	185|1157	701	3566.7	360|16376	1143	865.9	549|1143	Mammalia	Rodentia	Cricetidae	Handleyomys	Handleyomys alfaroi
530171	10	ef8859ca-3813-4a12-a54e-03b449f3fb14	KP778632.1	91.418	92.7066	90.442|96.197	0	1.74e-77	0|1.74e-76	536	553.3	185|1157	664	3566.7	360|16376	620	865.9	549|1143	Mammalia	Rodentia	Cricetidae	Handleyomys	Handleyomys alfaroi
530171	10	9aba3bea-426b-43f7-83ea-342386ce044e	MZ364443.1	91.327	92.7066	90.442|96.197	0	1.74e-77	0|1.74e-76	565	553.3	185|1157	4836	3566.7	360|16376	549	865.9	549|1143	Mammalia	Rodentia	Cricetidae	Handleyomys	Handleyomys alfaroi
530171	10	f860532a-2656-4a82-94a0-5986ecb151b4	KP778590.1	91.29	92.7066	90.442|96.197	0	1.74e-77	0|1.74e-76	597	553.3	185|1157	1391	3566.7	360|16376	613	865.9	549|1143	Mammalia	Rodentia	Cricetidae	Handleyomys	Handleyomys alfaroi
530171	10	6c76430d-b170-4ca9-b240-c4e1a7859040	KP778590.1	90.442	92.7066	90.442|96.197	0	1.74e-77	0|1.74e-76	565	553.3	185|1157	1838	3566.7	360|16376	613	865.9	549|1143	Mammalia	Rodentia	Cricetidae	Handleyomys	Handleyomys alfaroi
530171	10	05eee468-a778-4391-9ef2-6fd7b1546dae	KP778263.1	92.031	92.7066	90.442|96.197	2.75e-147	1.74e-77	0|1.74e-76	389	553.3	185|1157	425	3566.7	360|16376	1143	865.9	549|1143	Mammalia	Rodentia	Cricetidae	Handleyomys	Handleyomys alfaroi
530171	10	2c629c6d-9d76-433b-822c-34817e57df39	KP778238.1	95.513	92.7066	90.442|96.197	4.13e-135	1.74e-77	0|1.74e-76	312	553.3	185|1157	3691	3566.7	360|16376	1143	865.9	549|1143	Mammalia	Rodentia	Cricetidae	Handleyomys	Handleyomys alfaroi
70284	1	a53c9372-9693-4c1f-9ecd-17b67673f954	MN058077.1	94.071	94.071	94.071|94.071	2.14e-102	0	2.14e-102|2.14e-102	253	253	253|253	1616	1616	1616|1616	16331	16331	16331|16331	Mammalia	Rodentia	Cricetidae	Microtus	Microtus cabrerae
530171	10	6b8782ec-8be3-40c4-8a13-1a3ee25cc00d	KP778263.1	94.595	92.7066	90.442|96.197	1.74e-76	1.74e-77	0|1.74e-76	185	553.3	185|1157	360	3566.7	360|16376	1143	865.9	549|1143	Mammalia	Rodentia	Cricetidae	Handleyomys	Handleyomys alfaroi
218834	1	57fa2c60-1a00-4225-8de7-c9304958f8ca	AY863422.1	92.958	92.958	92.958|92.958	2.61e-76	2.61e-76	2.61e-76|2.61e-76	213	213	213|213	530	530	530|530	1182	1182	1182|1182	Mammalia	Rodentia	Cricetidae	Pseudoryzomys	Pseudoryzomys simplex
47230	1	d9a61d07-6f9d-4ba3-9d86-b5ed763e00b6	MZ438667.1	91.429	91.429	91.429|91.429	6.28e-52	6.28e-52	6.28e-52|6.28e-52	175	175	175|175	770	770	770|770	4282	4282	4282|4282	Mammalia	Rodentia	Cricetidae	Microtus	Microtus arvalis
175522	1	d75bf3a9-bc80-4d95-bd2d-1682640c1113	ON165286.1	93.464	93.464	93.464|93.464	3.84e-51	3.84e-51	3.84e-51|3.84e-51	153	153	153|153	1197	1197	1197|1197	16362	16362	16362|16362	Mammalia	Rodentia	Cricetidae	Lagurus	Lagurus lagurus
85953	1	1dd990d9-50d8-47b8-87fe-dafb48ddebc8	MN792984.1	91.579	91.579	91.579|91.579	5.82e-22	5.82e-22	5.82e-22|5.82e-22	95	95	95|95	7997	7997	7997|7997	16340	16340	16340|16340	Mammalia	Rodentia	Cricetidae	Dicrostonyx	Dicrostonyx groenlandicus
218826	1	d889d06b-4721-46b5-92e9-8fa7342769f0	MF696155.1	91.463	91.463	91.463|91.463	7.84e-22	7.84e-22	7.84e-22|7.84e-22	82	82	82|82	198	198	198|198	16314	16314	16314|16314	Mammalia	Rodentia	Cricetidae	Oligoryzomys	Oligoryzomys stramineus
89133	1	cf5a1270-2bf6-45ec-ab0c-e2406a933ea9	GU938909.1	91.176	91.176	91.176|91.176	1.84e-13	1.84e-13	1.84e-13|1.84e-13	68	68	68|68	3495	3495	3495|3495	666	666	666|666	Mammalia	Rodentia	Cricetidae	Thaptomys	Thaptomys nigrita
269658	1	4b2fcfbb-e40f-4393-bf6f-b8ce3ab34be6	MT381932.1	92.727	92.727	92.727|92.727	2.67e-10	2.67e-10	2.67e-10|2.67e-10	55	55	55|55	5650	5650	5650|5650	16339	16339	16339|16339	Mammalia	Rodentia	Cricetidae	Microtus	Microtus socialis
218793	1	c4b2b6c1-7ae1-4029-bf9d-3575a28a61fc	MH939287.1	90.566	90.566	90.566|90.566	2.33e-08	2.33e-08	2.33e-08|2.33e-08	53	53	53|53	2149	2149	2149|2149	16309	16309	16309|16309	Mammalia	Rodentia	Cricetidae	Melanomys	Melanomys caliginosus
JFD1634
subject.tax.id	Count	query.acc.ver	subject.acc.ver	X..identity	Average.X..identity	X..identity.range	evalue	Average.evalue	evalue.range	alignment.length	Average.alignment.length	alignment.length.range	query.length	Average.query.length	query.length.range	subject.length	Average.subject.length	subject.length.range	class	order	family	genus	species
2964401	6	e36038a2-a924-4258-bf86-5d6f9cde0789	MZ364419.1	92.664	91.815	91.336|92.664	0	1.16667e-72	0|7e-72	518	491	212|661	544	4094	277|15934	658	601	544|658	Mammalia	Rodentia	Cricetidae	Nephelomys	Nephelomys childi
1734924	9	16418988-d640-47d4-8d6a-5e1c9178670e	MN547686.1	92.176	91.6398	90.303|93.258	0	1.22346e-92	0|1.1e-91	1112	629.667	267|1155	3087	4930.67	1069|15166	1149	924	592|1149	Mammalia	Rodentia	Cricetidae	Nephelomys	Nephelomys devius
2964401	6	1af7dd2e-c93f-46d1-9a73-5f8cbd0c247e	MZ364464.1	91.863	91.815	91.336|92.664	0	1.16667e-72	0|7e-72	553	491	212|661	5045	4094	277|15934	544	601	544|658	Mammalia	Rodentia	Cricetidae	Nephelomys	Nephelomys childi
2964401	6	b448c388-fa1b-4509-97d7-e46cec422502	MZ364421.1	91.528	91.815	91.336|92.664	0	1.16667e-72	0|7e-72	661	491	212|661	2179	4094	277|15934	658	601	544|658	Mammalia	Rodentia	Cricetidae	Nephelomys	Nephelomys childi
2964401	6	5794bbd4-1c53-47cf-b784-0ba0d6ac1b39	MZ364464.1	91.336	91.815	91.336|92.664	0	1.16667e-72	0|7e-72	554	491	212|661	15934	4094	277|15934	544	601	544|658	Mammalia	Rodentia	Cricetidae	Nephelomys	Nephelomys childi
1734924	9	9b069e0e-bc80-4bfd-91a3-4e3e9776813a	MN547686.1	91.332	91.6398	90.303|93.258	0	1.22346e-92	0|1.1e-91	1119	629.667	267|1155	12373	4930.67	1069|15166	1149	924	592|1149	Mammalia	Rodentia	Cricetidae	Nephelomys	Nephelomys devius
1734924	9	56efaac7-bed6-46ad-b3a0-76c63a62b3a9	KP778209.1	90.698	91.6398	90.303|93.258	0	1.22346e-92	0|1.1e-91	688	629.667	267|1155	15166	4930.67	1069|15166	1143	924	592|1149	Mammalia	Rodentia	Cricetidae	Nephelomys	Nephelomys devius
1734924	9	4c522598-77cb-463f-9dce-6ba68dd4fe66	MN547686.1	90.303	91.6398	90.303|93.258	0	1.22346e-92	0|1.1e-91	1155	629.667	267|1155	6261	4930.67	1069|15166	1149	924	592|1149	Mammalia	Rodentia	Cricetidae	Nephelomys	Nephelomys devius
269650	1	035560df-6125-4c35-926e-b33fec4627e9	OK323269.1	90.476	90.476	90.476|90.476	1.44e-163	0	1.44e-163|1.44e-163	504	504	504|504	755	755	755|755	16300	16300	16300|16300	Mammalia	Rodentia	Cricetidae	Chionomys	Chionomys roberti
530178	5	e58c3022-1e40-4758-a08b-e5aaa609513f	JF693848.1	94.041	93.0336	91.367|94.118	4.55e-159	6.98e-20	4.55e-159|3.49e-19	386	256	68|393	456	1729.8	368|6000	384	655.6	384|1325	Mammalia	Rodentia	Cricetidae	Nephelomys	Nephelomys albigularis
530178	5	861db115-3c95-4f4c-97c8-8ea825203c36	JF693848.1	93.384	93.0336	91.367|94.118	1.43e-155	6.98e-20	4.55e-159|3.49e-19	393	256	68|393	6000	1729.8	368|6000	384	655.6	384|1325	Mammalia	Rodentia	Cricetidae	Nephelomys	Nephelomys albigularis
2964401	6	5c39931a-dc3a-4719-8f99-f7fe4df44272	MZ364420.1	91.518	91.815	91.336|92.664	2.81e-151	1.16667e-72	0|7e-72	448	491	212|661	585	4094	277|15934	658	601	544|658	Mammalia	Rodentia	Cricetidae	Nephelomys	Nephelomys childi
1734924	9	f5f76eb0-3660-44df-b44c-14b281e36e3d	KP778654.1	91.563	91.6398	90.303|93.258	2.23e-140	1.22346e-92	0|1.1e-91	403	629.667	267|1155	1069	4930.67	1069|15166	592	924	592|1149	Mammalia	Rodentia	Cricetidae	Nephelomys	Nephelomys devius
530172	2	e01dc34e-e02e-47e3-bb1b-a5608e4c2772	KP778473.1	95.088	92.9035	90.719|95.088	1.46e-119	0	1.46e-119|9.45e-104	285	309.5	285|334	394	741.5	394|1089	610	610	610|610	Mammalia	Rodentia	Cricetidae	Handleyomys	Handleyomys rostratus
2904038	3	5bf0e139-a76e-4898-be1e-435c0f1a15ec	MZ736551.1	91.765	92.2333	91.406|93.529	1.2e-116	2.76e-59	1.2e-116|8.28e-59	340	255.333	170|340	363	1931.33	363|4745	801	801	801|801	Mammalia	Rodentia	Cricetidae	Nephelomys	Nephelomys ricardopalmai
1734924	9	ed235b68-3a35-4a94-a34d-fbd21c856007	KP778481.1	92.429	91.6398	90.303|93.258	5.61e-116	1.22346e-92	0|1.1e-91	317	629.667	267|1155	1628	4930.67	1069|15166	592	924	592|1149	Mammalia	Rodentia	Cricetidae	Nephelomys	Nephelomys devius
218793	2	b06d0836-cfc1-4b5e-b0f8-6e0595614161	MH939287.1	93.197	92.053	90.909|93.197	3.04e-109	2.54e-40	3.04e-109|5.08e-40	294	213	132|294	2795	1874	953|2795	16309	16309	16309|16309	Mammalia	Rodentia	Cricetidae	Melanomys	Melanomys caliginosus
1734924	9	65c39930-6f82-4ee5-a89f-7557f96dd090	KP778654.1	90.691	91.6398	90.303|93.258	4.17e-106	1.22346e-92	0|1.1e-91	333	629.667	267|1155	1107	4930.67	1069|15166	592	924	592|1149	Mammalia	Rodentia	Cricetidae	Nephelomys	Nephelomys devius
530171	1	1c8d1d54-ddae-440f-9285-e127527c8450	KP778470.1	93.056	93.056	93.056|93.056	1.49e-105	0	1.49e-105|1.49e-105	288	288	288|288	1017	1017	1017|1017	613	613	613|613	Mammalia	Rodentia	Cricetidae	Handleyomys	Handleyomys alfaroi
577681	3	aeb8a8c8-1049-4baf-92b3-f6dcace64aeb	ON165314.1	91.159	91.1503	90.625|91.667	9.13e-104	4.2e-17	9.13e-104|1.26e-16	328	176	72|328	15747	6105.33	415|15747	16357	16357	16357|16357	Mammalia	Rodentia	Cricetidae	Eothenomys	Eothenomys chinensis
530172	2	9ae473e1-5244-41dc-a485-25ad51787860	KP778473.1	90.719	92.9035	90.719|95.088	9.45e-104	0	1.46e-119|9.45e-104	334	309.5	285|334	1089	741.5	394|1089	610	610	610|610	Mammalia	Rodentia	Cricetidae	Handleyomys	Handleyomys rostratus
89099	1	e17af3c0-e1e3-4d36-9d14-0bc9cbf6b6c3	KP027790.1	92.027	92.027	92.027|92.027	3.95e-103	0	3.95e-103|3.95e-103	301	301	301|301	1168	1168	1168|1168	860	860	860|860	Mammalia	Rodentia	Cricetidae	Hylaeamys	Hylaeamys megacephalus
106112	3	1380afc7-e5f7-4404-a6a6-5569bcd51001	KF769456.1	90.657	91.8403	90.476|94.388	9.13e-96	1.06667e-56	9.13e-96|3.2e-56	289	224.667	189|289	574	1761	574|2657	16378	16378	16378|16378	Mammalia	Rodentia	Cricetidae	Akodon	Akodon montensis
1734924	9	98f4f848-8e65-4478-b635-99add2ab2acc	MN547684.1	93.258	91.6398	90.303|93.258	1.11e-94	1.22346e-92	0|1.1e-91	267	629.667	267|1155	1756	4930.67	1069|15166	1149	924	592|1149	Mammalia	Rodentia	Cricetidae	Nephelomys	Nephelomys devius
1734924	9	18314f3b-8eb8-4440-9d83-14a7eb14410f	KP778272.1	92.308	91.6398	90.303|93.258	1.1e-91	1.22346e-92	0|1.1e-91	273	629.667	267|1155	1929	4930.67	1069|15166	801	924	592|1149	Mammalia	Rodentia	Cricetidae	Nephelomys	Nephelomys devius
530178	5	385573aa-6aa4-4248-87b3-b396de8d66b3	JF693848.1	91.367	93.0336	91.367|94.118	2.31e-91	6.98e-20	4.55e-159|3.49e-19	278	256	68|393	1052	1729.8	368|6000	384	655.6	384|1325	Mammalia	Rodentia	Cricetidae	Nephelomys	Nephelomys albigularis
2964402	1	7435ab05-d0a7-4b97-b53b-2a4f854b4b2c	MZ364468.1	92.4	92.4	92.4|92.4	4.44e-86	4.44e-86	4.44e-86|4.44e-86	250	250	250|250	3762	3762	3762|3762	542	542	542|542	Mammalia	Rodentia	Cricetidae	Nephelomys	Nephelomys meridensis
1499496	1	9d19f7b5-3453-4ba5-98cd-0888604ca52d	KP778591.1	90.706	90.706	90.706|90.706	2.65e-82	2.65e-82	2.65e-82|2.65e-82	269	269	269|269	1654	1654	1654|1654	615	615	615|615	Mammalia	Rodentia	Cricetidae	Handleyomys	Handleyomys chapmani
2904038	3	d404d7cb-da85-4a06-b0b0-ab1bb5814902	MZ736551.1	91.406	92.2333	91.406|93.529	1.64e-81	2.76e-59	1.2e-116|8.28e-59	256	255.333	170|340	686	1931.33	363|4745	801	801	801|801	Mammalia	Rodentia	Cricetidae	Nephelomys	Nephelomys ricardopalmai
106112	3	9f95337e-b7d7-4bc6-bcf6-1e12dd0e6af0	KF769456.1	94.388	91.8403	90.476|94.388	1.34e-75	1.06667e-56	9.13e-96|3.2e-56	196	224.667	189|289	2657	1761	574|2657	16378	16378	16378|16378	Mammalia	Rodentia	Cricetidae	Akodon	Akodon montensis
2964401	6	a8224a9b-d030-4c5c-b130-9c3597292ce0	MZ364463.1	91.981	91.815	91.336|92.664	7e-72	1.16667e-72	0|7e-72	212	491	212|661	277	4094	277|15934	544	601	544|658	Mammalia	Rodentia	Cricetidae	Nephelomys	Nephelomys childi
218826	2	1717524f-5f92-49f7-8696-289e6582cb8e	MF696155.1	90.079	90.6175	90.079|91.156	7.81e-69	8.7e-43	7.81e-69|1.74e-42	252	199.5	147|252	4916	2836.5	757|4916	16314	16314	16314|16314	Mammalia	Rodentia	Cricetidae	Oligoryzomys	Oligoryzomys stramineus
2904038	3	753d14a8-b716-418d-ba5a-0ec587fb8fb1	MZ736551.1	93.529	92.2333	91.406|93.529	8.28e-59	2.76e-59	1.2e-116|8.28e-59	170	255.333	170|340	4745	1931.33	363|4745	801	801	801|801	Mammalia	Rodentia	Cricetidae	Nephelomys	Nephelomys ricardopalmai
29102	1	e4c801f5-12db-4c7e-bfbe-8a9dabc5adb3	AF296277.1	93.96	93.96	93.96|93.96	2.83e-56	2.83e-56	2.83e-56|2.83e-56	149	149	149|149	479	479	479|479	1287	1287	1287|1287	Mammalia	Rodentia	Cricetidae	Akodon	Akodon urichi
106112	3	1dc1f807-2f10-4cdb-baa2-34ea277cbbf5	KF769456.1	90.476	91.8403	90.476|94.388	3.2e-56	1.06667e-56	9.13e-96|3.2e-56	189	224.667	189|289	2052	1761	574|2657	16378	16378	16378|16378	Mammalia	Rodentia	Cricetidae	Akodon	Akodon montensis
89150	2	47976207-50e2-4a4f-8eb8-3fd8d5eb1602	ON528119.1	94.286	93.143	92|94.286	7.87e-53	4.26e-09	7.87e-53|8.52e-09	140	95	50|140	1447	2251	1447|3055	16542	16574	16542|16606	Mammalia	Rodentia	Cricetidae	Reithrodontomys	Reithrodontomys mexicanus
447135	7	e3a1fec5-38af-409c-b858-7f6b15aeb76c	KM892835.1	90.674	90.8776	90.141|92.683	1.61e-52	3.91437e-09	1.61e-52|1.9e-08	193	87.4286	52|193	767	1940.71	767|2795	16347	16323.7	16282|16354	Mammalia	Rodentia	Cricetidae	Myodes	Myodes glareolus
530178	5	598599fc-e2a9-4415-9a5e-255d819e67cf	MZ736541.1	92.258	93.0336	91.367|94.118	5.66e-49	6.98e-20	4.55e-159|3.49e-19	155	256	68|393	773	1729.8	368|6000	801	655.6	384|1325	Mammalia	Rodentia	Cricetidae	Nephelomys	Nephelomys albigularis
200942	1	1b1c41a6-c316-4815-aa41-8fea4d2d779b	AJ496312.1	90.503	90.503	90.503|90.503	6e-49	6e-49	6e-49|6e-49	179	179	179|179	12168	12168	12168|12168	941	941	941|941	Mammalia	Rodentia	Cricetidae	Oecomys	Oecomys rutilus
218826	2	88766f68-a954-4b6d-b14e-e3f184e7ec15	MF696155.1	91.156	90.6175	90.079|91.156	1.74e-42	8.7e-43	7.81e-69|1.74e-42	147	199.5	147|252	757	2836.5	757|4916	16314	16314	16314|16314	Mammalia	Rodentia	Cricetidae	Oligoryzomys	Oligoryzomys stramineus
218793	2	1878e84f-5d30-476d-8148-d95cebd4da09	MH939287.1	90.909	92.053	90.909|93.197	5.08e-40	2.54e-40	3.04e-109|5.08e-40	132	213	132|294	953	1874	953|2795	16309	16309	16309|16309	Mammalia	Rodentia	Cricetidae	Melanomys	Melanomys caliginosus
2613866	1	fc10e26d-c7ed-4cb4-8240-e3f681794d7a	ON165313.1	91.667	91.667	91.667|91.667	1.75e-37	1.75e-37	1.75e-37|1.75e-37	132	132	132|132	377	377	377|377	16333	16333	16333|16333	Mammalia	Rodentia	Cricetidae	Neodon	Neodon sp. l BGI-2019
1433299	2	932ed10c-4266-465f-a73b-b42fa7a02efe	MT078818.1	92.373	91.7615	91.15|92.373	2.91e-37	4.87e-29	2.91e-37|9.74e-29	118	115.5	113|118	2344	3277.5	2344|4211	15975	15975	15975|15975	Mammalia	Rodentia	Cricetidae	Peromyscus	Peromyscus mekisturus
259054	1	d0744777-5db1-4fc7-8505-a0389f1a7436	ON165285.1	90.698	90.698	90.698|90.698	3.41e-35	3.41e-35	3.41e-35|3.41e-35	129	129	129|129	1202	1202	1202|1202	16344	16344	16344|16344	Mammalia	Rodentia	Cricetidae	Eothenomys	Eothenomys miletus
577681	3	d5f3b085-bdb7-4688-b9c2-174e82674a54	ON165314.1	90.625	91.1503	90.625|91.667	4.47e-35	4.2e-17	9.13e-104|1.26e-16	128	176	72|328	415	6105.33	415|15747	16357	16357	16357|16357	Mammalia	Rodentia	Cricetidae	Eothenomys	Eothenomys chinensis
1047088	1	d159776c-0f20-48cb-9a00-d7d3d13e29af	ON165390.1	90.511	90.511	90.511|90.511	4.2e-34	4.2e-34	4.2e-34|4.2e-34	137	137	137|137	978	978	978|978	6666	6666	6666|6666	Mammalia	Rodentia	Cricetidae	Arvicola	Arvicola amphibius
322708	1	49982c83-1483-4584-8b02-ce64e70625d4	DQ138954.1	90.476	90.476	90.476|90.476	8.97e-34	8.97e-34	8.97e-34|8.97e-34	126	126	126|126	2065	2065	2065|2065	1494	1494	1494|1494	Mammalia	Rodentia	Cricetidae	Peromyscus	Peromyscus perfulvus
322709	1	1a6f98d6-b830-49eb-867f-b5f68154556f	ON528115.1	93.396	93.396	93.396|93.396	2.3e-32	2.3e-32	2.3e-32|2.3e-32	106	106	106|106	907	907	907|907	16340	16340	16340|16340	Mammalia	Rodentia	Cricetidae	Peromyscus	Peromyscus megalops
85953	1	9d54726e-041c-4e98-8b82-8d56f6b2a69c	MN792984.1	93.878	93.878	93.878|93.878	2.28e-31	2.28e-31	2.28e-31|2.28e-31	98	98	98|98	2275	2275	2275|2275	16340	16340	16340|16340	Mammalia	Rodentia	Cricetidae	Dicrostonyx	Dicrostonyx groenlandicus
492276	1	73293acd-1e66-4db9-ada0-742654d8cadc	EU192185.1	90.741	90.741	90.741|90.741	9.02e-29	9.02e-29	9.02e-29|9.02e-29	108	108	108|108	273	273	273|273	952	952	952|952	Mammalia	Rodentia	Cricetidae	Oligoryzomys	Oligoryzomys sp. B MUSA2625
1433299	2	c07cff7b-b191-4b12-b103-d73e3b11b8f1	MT078818.1	91.15	91.7615	91.15|92.373	9.74e-29	4.87e-29	2.91e-37|9.74e-29	113	115.5	113|118	4211	3277.5	2344|4211	15975	15975	15975|15975	Mammalia	Rodentia	Cricetidae	Peromyscus	Peromyscus mekisturus
[truncated: 232 more rows]

## Sheet: Family-level Phyllostomidae
DC-BLAST results for bats (Phyllostomidae) family-level analyses.
JFD1644
[truncated: 129 more rows]

## Sheet: Family-level Vespertilionidae
DC-BLAST results for bats (Vespertilionidae) family-level analyses.
JFD1578
[truncated: 38 more rows]

## Sheet: Family-level Molossidae
DC-BLAST results for bats (Molossidae) family-level analyses.
JFD1636
[truncated: 23 more rows]

## Sheet: Family-level Didelphidae
DC-BLAST results for opposums (Didelphidae) family-level analyses.
[truncated: 208 more rows]
