# Supplementary material for: Identification of non-model mammal species using the MinION DNA sequencer from Oxford Nanopore
Source: PeerJ. 2024 Sep 25;12:e17887. doi: 10.7717/peerj.17887 (PMC11438440; doi:10.7717/peerj.17887)
Supplement: Supplemental Information 3 [file peerj-12-17887-s003.xlsx]

## Sheet: Accessions Complete List
	Scientific name	Marker	Genbank Accession #	Length (bp)
	Abrothrix olivaceus	CYTB	KC841338	1140
	Akodon aerosus	CYTB	KC841346	1140
	Akodon aerosus	CYTB	KC841410	1038
	Akodon aerosus	CYTB	KT965001	1106
	Akodon affinis	CYTB	AY196164	1140
	Akodon albiventer	CYTB	KC841341	1140
	Akodon albiventer	CYTB	KC841342	1140
	Akodon albiventer	CYTB	KC841357	1140
	Akodon azarae	CYTB	AY702963	801
	Akodon azarae	CYTB	AY702964	1140
	Akodon azarae	CYTB	KC841351	1140
	Akodon azarae	CYTB	KC841352	1140
	Akodon azarae	CYTB	KC841409	1065
	Akodon azarae	CYTB	DQ444328	1140
	Akodon azarae	CYTB	EF622507	1140
	Akodon baliolus	CYTB	KC841366	1126
	Akodon baliolus	CYTB	KC841368	1097
	Akodon boliviensis	CYTB	GU189317	800
	Akodon boliviensis	CYTB	GU189318	801
	Akodon boliviensis	CYTB	GU189319	801
	Akodon boliviensis	CYTB	GU189320	800
	Akodon boliviensis	CYTB	GU189321	801
	Akodon boliviensis	CYTB	KC841361	1140
	Akodon boliviensis	CYTB	KY753934	1140
	Akodon boliviensis	CYTB	MH177966	801
	Akodon budini	CYTB	EF166037	775
	Akodon caenosus	CYTB	GU189322	801
	Akodon caenosus	CYTB	GU189324	801
	Akodon caenosus	CYTB	GU189325	799
	Akodon caenosus	CYTB	GU189327	801
	Akodon caenosus	CYTB	KC841333	1140
	Akodon caenosus	CYTB	KC841344	1067
	Akodon caenosus	CYTB	KC841356	1080
	Akodon caenosus	CYTB	KC841359	1140
	Akodon caenosus	CYTB	KC841387	1140
	Akodon caenosus	CYTB	KC841391	1140
	Akodon caenosus	CYTB	KC841406	1140
	Akodon caenosus	CYTB	KC841407	1085
	Akodon cursor	CYTB	EF206814	1140
	Akodon cursor	CYTB	KC841339	1140
	Akodon cursor	CYTB	KF815391	861
	Akodon dayi	CYTB	EU260477	1140
	Akodon dolores	CYTB	EU260472	1140
	Akodon dolores	CYTB	EU260473	1140
	Akodon dolores	CYTB	EU260474	1140
	Akodon dolores	CYTB	EU260475	1140
	Akodon dolores	CYTB	EU260476	1140
	Akodon dolores	CYTB	KC841390	1140
	Akodon fumeus	CYTB	GU189328	799
	Akodon fumeus	CYTB	GU189329	800
	Akodon fumeus	CYTB	KC841332	1140
	Akodon fumeus	CYTB	KC841343	1140
	Akodon fumeus	CYTB	KC841354	1140
	Akodon fumeus	CYTB	KC841360	1140
	Akodon fumeus	CYTB	KC841369	1140
	Akodon fumeus	CYTB	KC841371	1140
	Akodon fumeus	CYTB	KC841375	1140
	Akodon fumeus	CYTB	KC841402	1087
	Akodon fumeus	CYTB	KC841403	1102
	Akodon glaucinus	CYTB	EU260483	1140
	Akodon glaucinus	CYTB	EU260484	1140
	Akodon glaucinus	CYTB	KC841384	1077
	Akodon iniscatus	CYTB	HM167761	801
	Akodon iniscatus	CYTB	HM167762	791
	Akodon iniscatus	CYTB	HM167768	801
	Akodon iniscatus	CYTB	HM167769	801
	Akodon iniscatus	CYTB	HM167770	801
	Akodon iniscatus	CYTB	KC841337	1140
	Akodon josemariarguedasi	CYTB	MK419959	786
	Akodon josemariarguedasi	CYTB	MK419965	801
	Akodon josemariarguedasi	CYTB	MK419966	801
	Akodon josemariarguedasi	CYTB	MK419970	789
	Akodon josemariarguedasi	CYTB	MK419971	795
	Akodon josemariarguedasi	CYTB	MK419972	564
	Akodon josemariarguedasi	CYTB	MK419973	789
	Akodon kofordi	CYTB	KC841365	1140
	Akodon kofordi	CYTB	KY753935	1050
	Akodon kotosh	CYTB	MK419960	801
	Akodon latebricola	CYTB	MT240524	801
	Akodon lutescens	CYTB	KY753936	1140
	Akodon lutescens	CYTB	KC841330	1140
	Akodon lutescens	CYTB	KC841331	1140
	Akodon lutescens	CYTB	KC841353	1140
	Akodon lutescens	CYTB	KC841358	1140
	Akodon lutescens	CYTB	KC841370	1140
	Akodon mollis	CYTB	KC841350	1086
	Akodon mollis	CYTB	KC841372	1126
	Akodon mollis	CYTB	KC841373	1140
	Akodon mollis	CYTB	KC841376	1067
	Akodon mollis	CYTB	KC841334	1140
	Akodon montensis	CYTB	AY195864	1140
	Akodon montensis	CYTB	EF206813	1140
	Akodon montensis	CYTB	EU251018	1140
	Akodon montensis	CYTB	EU251020	1138
	Akodon montensis	CYTB	EU251021	748
	Akodon montensis	CYTB	EU251022	1077
	Akodon montensis	CYTB	EU251023	597
	Akodon montensis	CYTB	KC841363	1140
	Akodon montensis	CYTB	KC841364	1140
	Akodon montensis	CYTB	KF207863	801
	Akodon montensis	CYTB	KF207864	801
	Akodon montensis	CYTB	MT861172	801
	Akodon montensis	CYTB	MT861178	801
	Akodon orophilus	CYTB	KC841335	1140
	Akodon orophilus	CYTB	KC841336	1140
	Akodon orophilus	CYTB	KY753937	427
	Akodon orophilus	CYTB	MK419968	801
	Akodon orophilus	CYTB	MK419969	801
	Akodon paranaensis	CYTB	AY195866	1140
	Akodon paranaensis	CYTB	EF621302	801
	Akodon paranaensis	CYTB	EF621303	801
	Akodon paranaensis	CYTB	EF621304	801
	Akodon paranaensis	CYTB	EF622506	1140
	Akodon paranaensis	CYTB	EU251017	1140
	Akodon paranaensis	CYTB	EU251019	1020
	Akodon paranaensis	CYTB	EU579471	1140
	Akodon philipmyersi	CYTB	AY702965	1140
	Akodon philipmyersi	CYTB	AY702966	1140
	Akodon polopi	CYTB	GU189330	801
	Akodon polopi	CYTB	GU189331	801
	Akodon reigi	CYTB	AY195865	1140
	Akodon reigi	CYTB	EF621305	801
	Akodon serrensis	CYTB	EF622508	1140
	Akodon simulator	CYTB	EU260480	1140
	Akodon simulator	CYTB	EU260481	1140
	Akodon simulator	CYTB	EU260482	1140
	Akodon simulator	CYTB	KC841383	1082
	Akodon simulator	CYTB	KC841405	1112
	Akodon simulator	CYTB	KC841408	1051
	Akodon sp.	CYTB	AY702968	801
	Akodon spegazzinii	CYTB	AY196165	1140
	Akodon spegazzinii	CYTB	GU189332	785
	Akodon spegazzinii	CYTB	GU189333	801
	Akodon spegazzinii	CYTB	GU189334	801
	Akodon spegazzinii	CYTB	GU189335	801
	Akodon spegazzinii	CYTB	GU189336	801
	Akodon spegazzinii	CYTB	GU189339	801
	Akodon spegazzinii	CYTB	GU189340	801
	Akodon spegazzinii	CYTB	GU189341	801
	Akodon spegazzinii	CYTB	GU189342	801
	Akodon spegazzinii	CYTB	GU189343	620
	Akodon spegazzinii	CYTB	GU189344	801
	Akodon spegazzinii	CYTB	GU189345	780
	Akodon spegazzinii	CYTB	GU189346	801
	Akodon spegazzinii	CYTB	GU189347	801
	Akodon spegazzinii	CYTB	GU189348	801
	Akodon spegazzinii	CYTB	HQ236017	801
	Akodon spegazzinii	CYTB	KC841378	1094
	Akodon spegazzinii	CYTB	KC841379	1140
	Akodon spegazzinii	CYTB	KC841380	1140
	Akodon spegazzinii	CYTB	KC841381	1140
	Akodon spegazzinii	CYTB	KC841382	1140
	Akodon spegazzinii	CYTB	KC841386	1140
	Akodon spegazzinii	CYTB	KC841392	1140
	Akodon spegazzinii	CYTB	KC841393	1140
	Akodon spegazzinii	CYTB	KC841394	1140
	Akodon spegazzinii	CYTB	KC841395	1140
	Akodon spegazzinii	CYTB	KC841397	1140
	Akodon spegazzinii	CYTB	KC841398	1140
	Akodon spegazzinii	CYTB	KC841399	1140
	Akodon spegazzinii	CYTB	KC841401	1085
	Akodon spegazzinii	CYTB	KY753938	426
	Akodon spegazzinii	CYTB	MK560499	801
	Akodon spegazzinii	CYTB	MK560500	801
	Akodon spegazzinii	CYTB	MK560503	801
	Akodon spegazzinii	CYTB	MK560504	801
	Akodon spegazzinii	CYTB	MK560507	801
	Akodon spegazzinii	CYTB	MK560516	801
	Akodon subfuscus	CYTB	KC841377	1140
	Akodon sylvanus	CYTB	DQ683180	788
	Akodon sylvanus	CYTB	DQ683181	790
	Akodon sylvanus	CYTB	GU189349	720
	Akodon sylvanus	CYTB	KC841404	1079
	Akodon tartareus	CYTB	EU260486	1140
	Akodon tartareus	CYTB	EU260487	1140
	Akodon toba	CYTB	KC841374	1140
	Akodon torques	CYTB	KC841345	1072
	Akodon torques	CYTB	KC841347	1140
	Akodon torques	CYTB	KC841348	1140
	Akodon torques	CYTB	MK419963	801
	Akodon torques	CYTB	MK419964	801
	Akodon varius	CYTB	EU260478	1140
	Akodon varius	CYTB	EU260479	1140
	Andinomys edax	CYTB	KC841355	1140
	Brucepattersonius soricinus	CYTB	KF815439	1137
	Necromys lactens	CYTB	EU260470	1140
	Necromys lasiurus	CYTB	EF622509	1140
	Necromys obscurus	CYTB	DQ683183	801
	Necromys sp.	CYTB	EU260471	1140
	Oligoryzomys destructor	CYTB	KC841388	1140
	Oligoryzomys destructor	CYTB	KC841389	1140
	Oligoryzomys nigripes	CYTB	EU251025	727
	Oligoryzomys nigripes	CYTB	EU251026	718
	Oligoryzomys nigripes	CYTB	EU251027	656
	Oligoryzomys nigripes	CYTB	EU251028	702
	Oligoryzomys nigripes	CYTB	EU251029	506
	Oligoryzomys nigripes	CYTB	EU251030	617
	Oligoryzomys nigripes	CYTB	EU251031	602
	Oligoryzomys nigripes	CYTB	EU251032	653
	Oligoryzomys nigripes	CYTB	EU251033	643
	Oligoryzomys nigripes	CYTB	EU251034	611
	Oxymycterus nasutus	CYTB	EF661854	1140
	Sooretamys angouya	CYTB	EU251024	688
	Thaptomys nigrita	CYTB	AF108666	1140
	Thaptomys nigrita	CYTB	EF206815	1140
	Akodon albiventer	COI	MW009981	655
	Akodon albiventer	COI	MW009982	655
	Akodon azarae	COI	GU938911	647
	Akodon azarae	COI	GU938989	649
	Akodon azarae	COI	MW009925	655
	Akodon boliviensis	COI	MW009941	655
	Akodon boliviensis	COI	MW009942	655
	Akodon boliviensis	COI	MW009943	655
	Akodon boliviensis	COI	MW009944	655
	Akodon boliviensis	COI	MW009947	655
	Akodon budini	COI	MW009976	655
	Akodon budini	COI	MW009977	655
	Akodon budini	COI	MW009978	655
	Akodon budini	COI	MW009979	655
	Akodon budini	COI	MW009980	638
	Akodon caenosus	COI	MW009932	655
	Akodon caenosus	COI	MW009933	655
	Akodon caenosus	COI	MW009935	655
	Akodon caenosus	COI	MW009937	655
	Akodon caenosus	COI	MW009938	655
	Akodon caenosus	COI	MW009939	655
	Akodon caenosus	COI	MW009940	655
	Akodon cursor	COI	KF815396	656
	Akodon dolores	COI	MZ050245	656
	Akodon dolores	COI	MZ050260	656
	Akodon fumeus	COI	MW009926	655
	Akodon mollis	COI	MF806209	656
	Akodon mollis	COI	MF806210	656
	Akodon mollis	COI	MF806211	656
	Akodon mollis	COI	MF806212	656
	Akodon mollis	COI	MF806213	656
	Akodon mollis	COI	MF806214	656
	Akodon mollis	COI	MF806216	656
	Akodon mollis	COI	MF806226	656
	Akodon mollis	COI	MF806233	656
	Akodon mollis	COI	MF806234	656
	Akodon mollis	COI	MF806242	656
	Akodon mollis	COI	MF806252	656
	Akodon mollis	COI	MF806253	656
	Akodon mollis	COI	MF806254	649
	Akodon mollis	COI	MF806255	656
	Akodon mollis	COI	MF806256	656
	Akodon mollis	COI	MF806258	656
	Akodon montensis	COI	GU938873	647
	Akodon montensis	COI	GU938874	647
	Akodon montensis	COI	GU938875	647
	Akodon montensis	COI	GU938913	647
	Akodon montensis	COI	GU938919	647
	Akodon montensis	COI	GU938920	647
	Akodon montensis	COI	GU938923	647
	Akodon montensis	COI	GU938926	647
	Akodon montensis	COI	GU938927	647
	Akodon montensis	COI	GU938928	647
	Akodon montensis	COI	GU938929	647
	Akodon montensis	COI	GU938930	647
	Akodon montensis	COI	GU938931	647
	Akodon montensis	COI	GU938932	647
	Akodon montensis	COI	GU938933	646
	Akodon montensis	COI	GU938934	647
	Akodon montensis	COI	KF769456	656
	Akodon montensis	COI	KJ013083	656
	Akodon montensis	COI	KJ013086	656
	Akodon oenos	COI	MZ050354	656
	Akodon paranaensis	COI	GU938991	649
	Akodon paranaensis	COI	GU938992	648
	Akodon paranaensis	COI	GU938993	649
	Akodon polopi	COI	MW009930	655
	Akodon polopi	COI	MW009931	655
	Akodon polopi	COI	MZ050240	656
	Akodon polopi	COI	MZ050246	656
	Akodon polopi	COI	MZ050253	656
	Akodon polopi	COI	MZ050301	656
	Akodon polopi	COI	MZ050310	656
	Akodon polopi	COI	MZ050356	656
	Akodon polopi	COI	MZ050357	656
	Akodon polopi	COI	MZ050367	656
	Akodon serrensis	COI	KF815397	656
	Akodon simulator	COI	MW009983	646
	Akodon simulator	COI	MW009984	655
	Akodon simulator	COI	MW009985	655
	Akodon simulator	COI	MW009986	655
	Akodon simulator	COI	MW009987	654
	Akodon simulator	COI	MW009988	655
	Akodon simulator	COI	MW009989	655
	Akodon simulator	COI	MW009991	655
	Akodon simulator	COI	MW009992	648
	Akodon simulator	COI	MW009993	655
	Akodon simulator	COI	MW009994	655
	Akodon simulator	COI	MW009996	655
	Akodon simulator	COI	MW009997	655
	Akodon simulator	COI	MW010001	655
	Akodon simulator	COI	MW010004	655
	Akodon simulator	COI	MZ050370	632
	Akodon sp. 1 JJM 2020	COI	MW009948	652
	Akodon spegazzinii	COI	MW009949	655
	Akodon spegazzinii	COI	MW009950	644
	Akodon spegazzinii	COI	MW009951	655
	Akodon spegazzinii	COI	MW009952	655
	Akodon spegazzinii	COI	MW009954	655
	Akodon spegazzinii	COI	MW009955	653
	Akodon spegazzinii	COI	MW009956	655
	Akodon spegazzinii	COI	MW009958	655
	Akodon spegazzinii	COI	MW009959	655
	Akodon spegazzinii	COI	MW009963	655
	Akodon spegazzinii	COI	MW009965	655
	Akodon spegazzinii	COI	MW009966	655
	Akodon spegazzinii	COI	MW009967	655
	Akodon spegazzinii	COI	MW009968	655
	Akodon spegazzinii	COI	MW009970	655
	Akodon spegazzinii	COI	MZ050235	656
	Akodon spegazzinii	COI	MZ050238	656
	Akodon spegazzinii	COI	MZ050242	656
	Akodon spegazzinii	COI	MZ050243	656
	Akodon spegazzinii	COI	MZ050254	656
	Akodon spegazzinii	COI	MZ050256	656
	Akodon spegazzinii	COI	MZ050263	656
	Akodon spegazzinii	COI	MZ050274	656
	Akodon spegazzinii	COI	MZ050280	656
	Akodon spegazzinii	COI	MZ050285	656
	Akodon spegazzinii	COI	MZ050288	656
	Akodon spegazzinii	COI	MZ050289	656
	Akodon spegazzinii	COI	MZ050309	656
	Akodon spegazzinii	COI	MZ050316	656
	Akodon spegazzinii	COI	MZ050321	656
	Akodon spegazzinii	COI	MZ050322	656
	Akodon spegazzinii	COI	MZ050333	656
	Akodon spegazzinii	COI	MZ050338	656
	Akodon spegazzinii	COI	MZ050363	656
	Akodon toba	COI	MW009971	655
	Akodon toba	COI	MW009972	655
	Akodon toba	COI	MW009974	655
	Akodon toba	COI	MW009975	655
	Akodon urichi	COI	JF491457	656
	Brucepattersonius soricinus	COI	KF815404	656
	Artibeus amplus	CYTB	EU160947	1140
	Artibeus amplus	CYTB	EU160946	1140
	Artibeus amplus	CYTB	AY642924	1140
	Artibeus amplus	CYTB	AY642923	1140
	Artibeus aztecus	CYTB	U66510	1140
	Artibeus aztecus	CYTB	FJ376713	1140
	Artibeus aztecus	CYTB	FJ376712	1140
	Artibeus cf. Jamaicensis	CYTB	DQ985488	1140
	Artibeus cf. Jamaicensis	CYTB	DQ903818	761
	Artibeus cf. Jamaicensis	CYTB	DQ985490	761
	Artibeus cf. Jamaicensis	CYTB	DQ985489	761
	Artibeus cf. Jamaicensis	CYTB	DQ985487	739
	Artibeus cf. Jamaicensis	CYTB	DQ985486	761
	Artibeus concolor	CYTB	U66519	1140
	Artibeus concolor	CYTB	U66518	1140
	Artibeus concolor	CYTB	EU160952	1140
	Artibeus concolor	CYTB	EU160951	1140
	Artibeus concolor	CYTB	EU160950	1140
	Artibeus concolor	CYTB	EU160949	1140
	Artibeus concolor	CYTB	EU160948	1140
	Artibeus fimbriatus	CYTB	U66498	1140
	Artibeus fimbriatus	CYTB	KT626651	1140
	Artibeus fimbriatus	CYTB	JX444076	739
	Artibeus fimbriatus	CYTB	JX444075	1140
	Artibeus fimbriatus	CYTB	JX444074	1140
	Artibeus fimbriatus	CYTB	EU160723	1140
	Artibeus fimbriatus	CYTB	EU160722	1140
	Artibeus fimbriatus	CYTB	EU160721	761
	Artibeus fimbriatus	CYTB	EU160720	1140
	Artibeus fimbriatus	CYTB	EU160719	1140
	Artibeus fimbriatus	CYTB	EU160718	1140
	Artibeus fimbriatus	CYTB	EU160717	1140
	Artibeus fimbriatus	CYTB	EU160716	1140
	Artibeus fimbriatus	CYTB	EU160715	1140
	Artibeus fimbriatus	CYTB	EU160714	1140
	Artibeus fimbriatus	CYTB	EU160713	1140
	Artibeus fimbriatus	CYTB	EU160712	1140
	Artibeus fimbriatus	CYTB	EU160711	1140
	Artibeus fimbriatus	CYTB	EU160710	1140
	Artibeus fimbriatus	CYTB	EU160709	1140
	Artibeus fimbriatus	CYTB	EU160708	1140
	Artibeus fimbriatus	CYTB	EU160707	1140
	Artibeus fimbriatus	CYTB	EU160706	1140
	Artibeus fimbriatus	CYTB	EU160705	1140
	Artibeus fimbriatus	CYTB	EU160704	1140
	Artibeus fimbriatus	CYTB	EU160702	1140
	Artibeus fimbriatus	CYTB	EU160701	1140
	Artibeus fimbriatus	CYTB	EU160700	1140
	Artibeus fimbriatus	CYTB	EU160699	1140
	Artibeus fimbriatus	CYTB	EU160698	1140
	Artibeus fimbriatus	CYTB	EU160697	1140
	Artibeus fimbriatus	CYTB	EU160696	1140
	Artibeus fimbriatus	CYTB	EU160695	1140
	Artibeus fimbriatus	CYTB	EU160694	1140
	Artibeus fimbriatus	CYTB	EU160692	1140
	Artibeus fimbriatus	CYTB	EU160691	1140
	Artibeus fimbriatus	CYTB	EU160690	1140
	Artibeus fimbriatus	CYTB	EU160689	1140
	Artibeus fimbriatus	CYTB	EU160688	1140
	Artibeus fimbriatus	CYTB	DQ985500	1140
	Artibeus fimbriatus	CYTB	DQ985479	1140
	Artibeus fimbriatus	CYTB	DQ985478	1140
	Artibeus fimbriatus	CYTB	DQ985477	1140
	Artibeus fimbriatus	CYTB	DQ985476	1140
	Artibeus fimbriatus	CYTB	DQ903820	1140
	Artibeus fimbriatus	CYTB	DQ869391	1140
	Artibeus fimbriatus	CYTB	DQ869390	1140
	Artibeus fraterculus	CYTB	U66499	1140
	Artibeus fraterculus	CYTB	GQ861588	1140
	Artibeus fraterculus	CYTB	GQ861587	1140
	Artibeus fraterculus	CYTB	GQ861586	1140
	Artibeus fraterculus	CYTB	EU160955	1140
	Artibeus fraterculus	CYTB	EU160954	1140
	Artibeus fraterculus	CYTB	EU160953	1140
	Artibeus fraterculus	CYTB	DQ869389	1140
	Artibeus fraterculus	CYTB	DQ869388	1140
	Artibeus hartii	CYTB	U66517	1140
	Artibeus hartii	CYTB	ON321892	1140
	Artibeus hartii	CYTB	065681	1140
	Artibeus hartii	CYTB	EU160972	1140
	Artibeus hartii	CYTB	EU160971	1140
	Artibeus hirsutus	CYTB	U66500	1140
	Artibeus hirsutus	CYTB	AY144341	1140
	Artibeus inopinatus	CYTB	U66501	1140
	Artibeus intermedius	CYTB	U66502	1140
	Artibeus intermedius	CYTB	HQ702544	1140
	Artibeus intermedius	CYTB	HQ702543	1140
	Artibeus intermedius	CYTB	HQ702542	1140
	Artibeus intermedius	CYTB	HQ702541	1140
	Artibeus intermedius	CYTB	HQ702540	1140
	Artibeus intermedius	CYTB	HQ702539	713
	Artibeus intermedius	CYTB	AY144339	1140
	Artibeus intermedius	CYTB	AY144338	1140
	Artibeus jamaicensis	CYTB	DQ869484	1140
	Artibeus jamaicensis	CYTB	DQ869483	1140
	Artibeus jamaicensis	CYTB	AY144347	1140
	Artibeus jamaicensis	CYTB	AY144343	1140
	Artibeus jamaicensis	CYTB	AY144340	1140
	Artibeus jamaicensis	CYTB	U66504	1140
	Artibeus jamaicensis	CYTB	U66503	1140
	Artibeus jamaicensis	CYTB	AY382782	1140
	Artibeus jamaicensis	CYTB	AY144346	1140
	Artibeus jamaicensis	CYTB	AY144345	1140
	Artibeus jamaicensis	CYTB	AY144344	1140
	Artibeus jamaicensis	CYTB	AY144342	1140
	Artibeus jamaicensis	CYTB	DQ869454	1140
	Artibeus jamaicensis	CYTB	DQ869453	1140
	Artibeus jamaicensis	CYTB	DQ869452	1140
	Artibeus jamaicensis	CYTB	DQ869451	1070
	Artibeus jamaicensis	CYTB	AY382785	1140
	Artibeus jamaicensis	CYTB	AY382784	1140
	Artibeus jamaicensis	CYTB	AY382783	1140
	Artibeus jamaicensis	CYTB	DQ869456	1140
	Artibeus jamaicensis	CYTB	DQ869455	1140
	Artibeus jamaicensis	CYTB	AY382786	1140
	Artibeus jamaicensis	CYTB	DQ869474	1140
	Artibeus jamaicensis	CYTB	JX502735	1140
	Artibeus jamaicensis	CYTB	JX502734	1140
	Artibeus jamaicensis	CYTB	JX502733	1140
	Artibeus jamaicensis	CYTB	JX502732	1140
	Artibeus jamaicensis	CYTB	JX502731	1140
	Artibeus jamaicensis	CYTB	JX502730	1140
	Artibeus jamaicensis	CYTB	JX502729	1140
	Artibeus jamaicensis	CYTB	JX502728	1140
	Artibeus jamaicensis	CYTB	JX502727	1095
	Artibeus jamaicensis	CYTB	JX502726	1140
	Artibeus jamaicensis	CYTB	JX502725	1097
	Artibeus jamaicensis	CYTB	JX502724	1140
	Artibeus jamaicensis	CYTB	JX502723	1140
	Artibeus jamaicensis	CYTB	JX502722	1140
	Artibeus jamaicensis	CYTB	JX502721	1140
	Artibeus jamaicensis	CYTB	JX502720	1076
	Artibeus jamaicensis	CYTB	JX502719	430
	Artibeus jamaicensis	CYTB	JX502718	430
	Artibeus jamaicensis	CYTB	JX502717	430
	Artibeus jamaicensis	CYTB	JX502716	373
	Artibeus jamaicensis	CYTB	JX502715	347
	Artibeus jamaicensis	CYTB	JX502714	428
	Artibeus jamaicensis	CYTB	JX502713	1140
	Artibeus jamaicensis	CYTB	JX502712	1140
	Artibeus jamaicensis	CYTB	JX502709	1140
	Artibeus jamaicensis	CYTB	JX502708	1140
	Artibeus jamaicensis	CYTB	JX502707	612
	Artibeus jamaicensis	CYTB	JX502706	612
	Artibeus jamaicensis	CYTB	JX502705	612
	Artibeus jamaicensis	CYTB	JX502704	612
	Artibeus jamaicensis	CYTB	JX502703	612
	Artibeus jamaicensis	CYTB	JX502702	612
	Artibeus jamaicensis	CYTB	JX502701	612
	Artibeus jamaicensis	CYTB	JX502700	612
	Artibeus jamaicensis	CYTB	JX502699	612
	Artibeus jamaicensis	CYTB	JX502698	612
	Artibeus jamaicensis	CYTB	JX502697	612
	Artibeus jamaicensis	CYTB	JX502696	612
	Artibeus jamaicensis	CYTB	JX502695	612
	Artibeus jamaicensis	CYTB	JX502694	612
	Artibeus jamaicensis	CYTB	JX502693	612
	Artibeus jamaicensis	CYTB	JX502692	612
	Artibeus jamaicensis	CYTB	JX502691	612
	Artibeus jamaicensis	CYTB	JX502690	612
	Artibeus jamaicensis	CYTB	JX502689	612
	Artibeus jamaicensis	CYTB	JX502688	612
	Artibeus jamaicensis	CYTB	JX502687	612
	Artibeus jamaicensis	CYTB	JX502686	612
	Artibeus jamaicensis	CYTB	JX502685	612
	Artibeus jamaicensis	CYTB	JX502684	612
	Artibeus jamaicensis	CYTB	JX502683	612
	Artibeus jamaicensis	CYTB	JX502682	612
	Artibeus jamaicensis	CYTB	JX502681	612
	Artibeus jamaicensis	CYTB	JX502680	612
	Artibeus jamaicensis	CYTB	JX502679	612
	Artibeus jamaicensis	CYTB	JX502678	612
	Artibeus jamaicensis	CYTB	DQ869515	612
	Artibeus jamaicensis	CYTB	DQ869508	612
	Artibeus jamaicensis	CYTB	DQ869495	612
	Artibeus jamaicensis	CYTB	DQ869479	612
	Artibeus jamaicensis	CYTB	GQ861665	612
	Artibeus jamaicensis	CYTB	GQ861660	612
	Artibeus jamaicensis	CYTB	GQ861659	612
	Artibeus jamaicensis	CYTB	GQ861594	612
	Artibeus jamaicensis	CYTB	GQ861593	612
	Artibeus jamaicensis	CYTB	GQ861592	612
	Artibeus jamaicensis	CYTB	GQ861591	612
	Artibeus jamaicensis	CYTB	AY572364	612
	Artibeus jamaicensis	CYTB	AY572363	612
	Artibeus jamaicensis	CYTB	AY572362	612
	Artibeus jamaicensis	CYTB	AY572361	612
	Artibeus jamaicensis	CYTB	AY572359	612
	Artibeus jamaicensis	CYTB	AY572358	612
	Artibeus jamaicensis	CYTB	AY572357	612
	Artibeus jamaicensis	CYTB	AY572356	612
	Artibeus jamaicensis	CYTB	AY572355	612
	Artibeus jamaicensis	CYTB	AY572354	612
	Artibeus jamaicensis	CYTB	AY572353	612
	Artibeus jamaicensis	CYTB	AY572352	612
	Artibeus jamaicensis	CYTB	AY572350	612
	Artibeus jamaicensis	CYTB	AY572349	612
	Artibeus jamaicensis	CYTB	AY572348	612
	Artibeus jamaicensis	CYTB	AY572347	1140
	Artibeus jamaicensis	CYTB	AY572346	1140
	Artibeus jamaicensis	CYTB	AY572345	1140
	Artibeus jamaicensis	CYTB	AY572344	1140
	Artibeus jamaicensis	CYTB	AY572343	1140
	Artibeus jamaicensis	CYTB	AY572342	1140
	Artibeus jamaicensis	CYTB	AY572341	1140
	Artibeus jamaicensis	CYTB	AY572339	1140
	Artibeus jamaicensis	CYTB	AY572338	1140
	Artibeus jamaicensis	CYTB	DQ869450	1140
	Artibeus jamaicensis	CYTB	DQ869449	1140
	Artibeus jamaicensis	CYTB	DQ869448	1140
	Artibeus jamaicensis	CYTB	DQ869447	1140
	Artibeus jamaicensis	CYTB	DQ869446	1140
	Artibeus jamaicensis	CYTB	DQ869445	1140
	Artibeus jamaicensis	CYTB	DQ869444	1140
	Artibeus jamaicensis	CYTB	DQ869443	1140
	Artibeus jamaicensis	CYTB	DQ869442	1140
	Artibeus jamaicensis	CYTB	DQ869441	1140
	Artibeus jamaicensis	CYTB	DQ869440	1140
	Artibeus jamaicensis	CYTB	DQ869421	1140
	Artibeus jamaicensis	CYTB	DQ869420	1140
	Artibeus jamaicensis	CYTB	DQ869419	1140
	Artibeus lituratus	CYTB	U66505	1140
	Artibeus lituratus	CYTB	KP134572	739
	Artibeus lituratus	CYTB	JX444082	1140
	Artibeus lituratus	CYTB	JX444081	1140
	Artibeus lituratus	CYTB	JX444080	1140
	Artibeus lituratus	CYTB	JX444077	1140
	Artibeus lituratus	CYTB	HQ702538	1140
	Artibeus lituratus	CYTB	HQ702537	1140
	Artibeus lituratus	CYTB	HQ702536	761
	Artibeus lituratus	CYTB	HQ702535	761
	Artibeus lituratus	CYTB	GQ861670	761
	Artibeus lituratus	CYTB	GQ861668	761
	Artibeus lituratus	CYTB	GQ861609	761
	Artibeus lituratus	CYTB	GQ861607	761
	Artibeus lituratus	CYTB	GQ861605	1140
	Artibeus lituratus	CYTB	GQ861604	1140
	Artibeus lituratus	CYTB	GQ861603	1140
	Artibeus lituratus	CYTB	GQ861602	1140
	Artibeus lituratus	CYTB	GQ861601	1140
	Artibeus lituratus	CYTB	EU160833	1140
	Artibeus lituratus	CYTB	EU160832	1140
	Artibeus lituratus	CYTB	EU160831	1140
	Artibeus lituratus	CYTB	EU160830	1140
	Artibeus lituratus	CYTB	EU160829	1140
	Artibeus lituratus	CYTB	EU160828	1140
	Artibeus lituratus	CYTB	EU160827	1140
	Artibeus lituratus	CYTB	EU160826	1140
	Artibeus lituratus	CYTB	EU160825	1140
	Artibeus lituratus	CYTB	EU160824	1140
	Artibeus lituratus	CYTB	EU160823	1140
	Artibeus lituratus	CYTB	EU160822	1140
	Artibeus lituratus	CYTB	EU160821	1140
	Artibeus lituratus	CYTB	EU160820	1140
	Artibeus lituratus	CYTB	EU160819	1140
	Artibeus lituratus	CYTB	EU160818	1140
	Artibeus lituratus	CYTB	EU160817	1140
	Artibeus lituratus	CYTB	EU160816	1140
	Artibeus lituratus	CYTB	EU160815	1140
	Artibeus lituratus	CYTB	EU160814	1140
	Artibeus lituratus	CYTB	EU160813	1140
	Artibeus lituratus	CYTB	EU160812	1140
	Artibeus lituratus	CYTB	EU160811	1140
	Artibeus lituratus	CYTB	EU160810	1140
	Artibeus lituratus	CYTB	EU160809	1140
	Artibeus lituratus	CYTB	EU160808	1140
	Artibeus lituratus	CYTB	EU160807	1140
	Artibeus lituratus	CYTB	EU160806	1140
	Artibeus lituratus	CYTB	EU160805	1140
	Artibeus lituratus	CYTB	EU160804	1140
	Artibeus lituratus	CYTB	EU160803	1140
	Artibeus lituratus	CYTB	EU160802	1140
	Artibeus lituratus	CYTB	EU160801	1140
	Artibeus lituratus	CYTB	EU160800	1140
	Artibeus lituratus	CYTB	EU160799	1140
	Artibeus lituratus	CYTB	EU160798	1140
	Artibeus lituratus	CYTB	EU160797	1140
	Artibeus lituratus	CYTB	EU160796	1140
	Artibeus lituratus	CYTB	EU160795	1140
	Artibeus lituratus	CYTB	EU160794	1140
	Artibeus lituratus	CYTB	EU160793	1140
	Artibeus lituratus	CYTB	EU160792	1140
	Artibeus lituratus	CYTB	EU160791	1140
	Artibeus lituratus	CYTB	EU160790	1140
	Artibeus lituratus	CYTB	EU160789	1140
	Artibeus lituratus	CYTB	EU160788	1140
	Artibeus lituratus	CYTB	EU160787	1140
	Artibeus lituratus	CYTB	EU160786	1140
	Artibeus lituratus	CYTB	EU160785	1140
	Artibeus lituratus	CYTB	EU160784	1140
	Artibeus lituratus	CYTB	EU160783	1140
	Artibeus lituratus	CYTB	EU160782	1140
	Artibeus lituratus	CYTB	EU160781	1140
	Artibeus lituratus	CYTB	EU160780	1140
	Artibeus lituratus	CYTB	EU160779	1140
	Artibeus lituratus	CYTB	EU160778	1140
	Artibeus lituratus	CYTB	EU160777	1140
	Artibeus lituratus	CYTB	EU160776	1140
	Artibeus lituratus	CYTB	EU160775	1140
	Artibeus lituratus	CYTB	EU160774	1140
	Artibeus lituratus	CYTB	EU160773	1140
	Artibeus lituratus	CYTB	EU160772	1140
	Artibeus lituratus	CYTB	EU160771	1140
	Artibeus lituratus	CYTB	EU160770	1140
	Artibeus lituratus	CYTB	EU160769	1140
	Artibeus lituratus	CYTB	EU160768	1140
	Artibeus lituratus	CYTB	EU160767	1140
	Artibeus lituratus	CYTB	EU160766	1140
	Artibeus lituratus	CYTB	EU160765	1140
	Artibeus lituratus	CYTB	EU160764	1140
	Artibeus lituratus	CYTB	EU160763	1140
	Artibeus lituratus	CYTB	EU160762	1140
	Artibeus lituratus	CYTB	EU160761	1140
	Artibeus lituratus	CYTB	EU160760	1140
	Artibeus lituratus	CYTB	EU160759	1140
	Artibeus lituratus	CYTB	EU160758	1140
	Artibeus lituratus	CYTB	EU160757	1140
	Artibeus lituratus	CYTB	EU160756	1140
	Artibeus lituratus	CYTB	EU160755	1140
	Artibeus lituratus	CYTB	EU160754	1140
	Artibeus lituratus	CYTB	EU160753	1140
	Artibeus lituratus	CYTB	EU160752	1140
	Artibeus lituratus	CYTB	EU160751	1140
	Artibeus lituratus	CYTB	EU160750	1140
	Artibeus lituratus	CYTB	EU160749	1140
	Artibeus lituratus	CYTB	EU160748	1140
	Artibeus lituratus	CYTB	EU160747	1140
	Artibeus lituratus	CYTB	EU160746	1140
	Artibeus lituratus	CYTB	EU160745	1140
	Artibeus lituratus	CYTB	EU160744	1140
	Artibeus lituratus	CYTB	EU160743	1140
	Artibeus lituratus	CYTB	EU160742	1140
	Artibeus lituratus	CYTB	EU160741	1140
	Artibeus lituratus	CYTB	EU160740	1140
	Artibeus lituratus	CYTB	EU160739	1140
	Artibeus lituratus	CYTB	EU160738	1140
	Artibeus lituratus	CYTB	EU160737	1140
	Artibeus lituratus	CYTB	EU160736	1140
	Artibeus lituratus	CYTB	EU160735	1140
	Artibeus lituratus	CYTB	EU160734	1140
	Artibeus lituratus	CYTB	EU160733	1140
	Artibeus lituratus	CYTB	EU160732	1140
	Artibeus lituratus	CYTB	EU160731	1140
	Artibeus lituratus	CYTB	EU160730	1140
	Artibeus lituratus	CYTB	EU160729	1140
	Artibeus lituratus	CYTB	EU160728	401
	Artibeus lituratus	CYTB	EU160727	430
	Artibeus lituratus	CYTB	EU160726	397
	Artibeus lituratus	CYTB	EU160725	440
	Artibeus lituratus	CYTB	EU160724	430
	Artibeus lituratus	CYTB	DQ985499	1140
	Artibeus lituratus	CYTB	DQ985496	439
	Artibeus lituratus	CYTB	DQ985495	1140
	Artibeus lituratus	CYTB	DQ985494	1122
	Artibeus lituratus	CYTB	DQ985493	1140
	Artibeus lituratus	CYTB	DQ985492	1140
	Artibeus lituratus	CYTB	DQ985485	1140
	Artibeus lituratus	CYTB	DQ985484	1140
	Artibeus lituratus	CYTB	DQ985483	1140
	Artibeus lituratus	CYTB	DQ985482	1140
	Artibeus lituratus	CYTB	DQ985481	1140
	Artibeus lituratus	CYTB	DQ985480	1140
	Artibeus lituratus	CYTB	DQ903819	1140
	Artibeus lituratus	CYTB	DQ869393	1140
	Artibeus obscurus	CYTB	U66507	1140
	Artibeus obscurus	CYTB	U66506	1140
	Artibeus obscurus	CYTB	MG704583	1140
	Artibeus obscurus	CYTB	MG704581	1140
	Artibeus obscurus	CYTB	MG704580	1140
	Artibeus obscurus	CYTB	MG704579	1140
	Artibeus obscurus	CYTB	MG704578	1140
	Artibeus obscurus	CYTB	MG704577	1140
	Artibeus obscurus	CYTB	MG704576	1140
	Artibeus obscurus	CYTB	MG704575	1140
	Artibeus obscurus	CYTB	MG704574	1140
	Artibeus obscurus	CYTB	MG704573	1140
	Artibeus obscurus	CYTB	MG704572	1140
	Artibeus obscurus	CYTB	MG704571	1140
	Artibeus obscurus	CYTB	JX444084	1140
	Artibeus obscurus	CYTB	GU932714	1140
	Artibeus obscurus	CYTB	GU932713	1140
	Artibeus obscurus	CYTB	GU932712	1140
	Artibeus obscurus	CYTB	GU932711	1140
	Artibeus obscurus	CYTB	GU932710	1140
	Artibeus obscurus	CYTB	GU932709	1140
	Artibeus obscurus	CYTB	GU932706	1140
	Artibeus obscurus	CYTB	GU932704	1140
	Artibeus obscurus	CYTB	GU932702	1140
	Artibeus obscurus	CYTB	GU932701	1140
	Artibeus obscurus	CYTB	GU932700	1140
	Artibeus obscurus	CYTB	GU932698	1140
	Artibeus obscurus	CYTB	GU932696	1140
	Artibeus obscurus	CYTB	GU932694	1140
	Artibeus obscurus	CYTB	GU932693	1140
	Artibeus obscurus	CYTB	GU932692	1140
	Artibeus obscurus	CYTB	GU932691	1140
	Artibeus obscurus	CYTB	GU932690	1140
	Artibeus obscurus	CYTB	GU932689	1140
	Artibeus obscurus	CYTB	GU932688	1140
	Artibeus obscurus	CYTB	GU932687	1110
	Artibeus obscurus	CYTB	GU932686	1110
	Artibeus obscurus	CYTB	GU932685	1110
	Artibeus obscurus	CYTB	GU932684	1110
	Artibeus obscurus	CYTB	GU356393	1110
	Artibeus obscurus	CYTB	EU160865	1110
	Artibeus obscurus	CYTB	EU160864	1110
	Artibeus obscurus	CYTB	EU160863	1110
	Artibeus obscurus	CYTB	EU160862	1110
	Artibeus obscurus	CYTB	EU160861	1110
	Artibeus obscurus	CYTB	EU160860	1110
	Artibeus obscurus	CYTB	EU160859	1110
	Artibeus obscurus	CYTB	EU160858	1110
	Artibeus obscurus	CYTB	EU160857	1110
	Artibeus obscurus	CYTB	EU160856	1110
	Artibeus obscurus	CYTB	EU160855	1110
	Artibeus obscurus	CYTB	EU160854	1110
	Artibeus obscurus	CYTB	EU160853	1072
	Artibeus obscurus	CYTB	EU160852	1110
	Artibeus obscurus	CYTB	EU160851	1110
	Artibeus obscurus	CYTB	EU160850	1110
	Artibeus obscurus	CYTB	EU160849	1110
	Artibeus obscurus	CYTB	EU160848	1110
	Artibeus obscurus	CYTB	EU160847	1110
	Artibeus obscurus	CYTB	EU160846	1140
	Artibeus obscurus	CYTB	EU160845	585
	Artibeus obscurus	CYTB	EU160844	585
	Artibeus obscurus	CYTB	EU160843	585
	Artibeus obscurus	CYTB	EU160842	585
	Artibeus obscurus	CYTB	EU160841	585
	Artibeus obscurus	CYTB	EU160840	585
	Artibeus obscurus	CYTB	EU160839	585
	Artibeus obscurus	CYTB	EU160838	585
	Artibeus obscurus	CYTB	EU160837	585
	Artibeus obscurus	CYTB	EU160836	585
	Artibeus obscurus	CYTB	EU160835	585
	Artibeus obscurus	CYTB	EU160834	585
	Artibeus obscurus	CYTB	DQ869392	1140
	Artibeus obscurus	CYTB	AY642921	1140
	Artibeus planirostris	CYTB	U66508	1140
	Artibeus planirostris	CYTB	DQ869433	1140
	Artibeus planirostris	CYTB	DQ869432	1140
	Artibeus planirostris	CYTB	DQ869425	1140
	Artibeus planirostris	CYTB	DQ869424	1140
	Artibeus planirostris	CYTB	DQ869422	1140
	Artibeus planirostris	CYTB	DQ869396	1140
	Artibeus planirostris	CYTB	DQ869395	1140
	Artibeus planirostris	CYTB	DQ869394	1140
	Artibeus planirostris	CYTB	MH043363	1140
	Artibeus planirostris	CYTB	KT149210	1140
	Artibeus planirostris	CYTB	KT149209	1140
	Artibeus planirostris	CYTB	KT149208	1140
	Artibeus planirostris	CYTB	KT149206	1140
	Artibeus planirostris	CYTB	KT149201	1140
	Artibeus planirostris	CYTB	KT149200	1140
	Artibeus planirostris	CYTB	KT149199	1140
	Artibeus planirostris	CYTB	KT149198	1140
	Artibeus planirostris	CYTB	KT149196	1140
	Artibeus planirostris	CYTB	KT149194	1140
	Artibeus planirostris	CYTB	KT149193	1140
	Artibeus planirostris	CYTB	KT149192	1140
	Artibeus planirostris	CYTB	KT149190	1140
	Artibeus planirostris	CYTB	JX444086	1140
	Artibeus planirostris	CYTB	JX444085	1140
	Artibeus planirostris	CYTB	DQ869418	1140
	Artibeus planirostris	CYTB	DQ869417	1140
	Artibeus planirostris	CYTB	DQ869416	1140
	Artibeus planirostris	CYTB	DQ869415	1140
	Artibeus planirostris	CYTB	DQ869414	1140
	Artibeus planirostris	CYTB	DQ869413	1140
	Artibeus planirostris	CYTB	DQ869412	1140
	Artibeus planirostris	CYTB	DQ869411	1140
	Artibeus planirostris	CYTB	DQ869410	1140
	Artibeus planirostris	CYTB	DQ869409	1140
	Artibeus planirostris	CYTB	DQ869408	1140
	Artibeus planirostris	CYTB	DQ869407	1140
	Artibeus planirostris	CYTB	DQ869406	1140
	Artibeus planirostris	CYTB	DQ869405	1140
	Artibeus planirostris	CYTB	DQ869404	1140
	Artibeus planirostris	CYTB	DQ869403	1140
	Artibeus planirostris	CYTB	DQ869402	1140
	Artibeus planirostris	CYTB	DQ869401	1140
	Artibeus planirostris	CYTB	DQ869400	1140
	Artibeus planirostris	CYTB	DQ869399	1140
	Artibeus planirostris	CYTB	DQ869397	1140
	Artibeus planirostris	CYTB	DQ869436	1140
	Artibeus planirostris	CYTB	GQ861708	1140
	Artibeus planirostris	CYTB	GQ861707	1140
	Artibeus planirostris	CYTB	GQ861701	1140
	Artibeus planirostris	CYTB	GQ861699	1140
	Artibeus planirostris	CYTB	GQ861698	1140
	Artibeus planirostris	CYTB	GQ861696	1140
	Artibeus planirostris	CYTB	GQ861695	1140
	Artibeus planirostris	CYTB	GQ861684	1140
	Artibeus planirostris	CYTB	GQ861681	1140
	Artibeus planirostris	CYTB	GQ861680	1140
	Artibeus planirostris	CYTB	GQ861679	1140
	Artibeus planirostris	CYTB	GQ861676	1140
	Artibeus planirostris	CYTB	GQ861673	1140
	Artibeus planirostris	CYTB	GQ861613	1140
	Artibeus planirostris	CYTB	GQ861610	1140
	Artibeus planirostris	CYTB	DQ869426	1140
	Artibeus planirostris	CYTB	DQ869398	1140
	Artibeus planirostris	CYTB	EU160945	1140
	Artibeus planirostris	CYTB	EU160944	1140
	Artibeus planirostris	CYTB	EU160943	1140
	Artibeus planirostris	CYTB	EU160942	1140
	Artibeus planirostris	CYTB	EU160941	1140
	Artibeus planirostris	CYTB	EU160940	1140
	Artibeus planirostris	CYTB	EU160939	1140
	Artibeus planirostris	CYTB	EU160938	1140
	Artibeus planirostris	CYTB	EU160937	1140
	Artibeus planirostris	CYTB	EU160936	1140
	Artibeus planirostris	CYTB	EU160935	1140
	Artibeus planirostris	CYTB	EU160934	1140
	Artibeus planirostris	CYTB	EU160933	1140
	Artibeus planirostris	CYTB	EU160932	1140
	Artibeus planirostris	CYTB	EU160931	1140
	Artibeus planirostris	CYTB	EU160930	1140
	Artibeus planirostris	CYTB	EU160929	1140
	Artibeus planirostris	CYTB	EU160928	1140
	Artibeus planirostris	CYTB	EU160927	1140
	Artibeus planirostris	CYTB	EU160926	1140
	Artibeus planirostris	CYTB	EU160925	1140
	Artibeus planirostris	CYTB	EU160924	1140
	Artibeus planirostris	CYTB	EU160923	1140
	Artibeus planirostris	CYTB	EU160922	1140
	Artibeus planirostris	CYTB	EU160921	1140
	Artibeus planirostris	CYTB	EU160920	1140
	Artibeus planirostris	CYTB	EU160919	1140
	Artibeus planirostris	CYTB	EU160918	458
	Artibeus planirostris	CYTB	EU160917	443
	Artibeus planirostris	CYTB	EU160916	440
	Artibeus planirostris	CYTB	EU160915	1140
	Artibeus planirostris	CYTB	EU160914	1140
	Artibeus planirostris	CYTB	EU160913	1140
	Artibeus planirostris	CYTB	EU160912	442
	Artibeus planirostris	CYTB	EU160911	443
	Artibeus planirostris	CYTB	EU160910	1140
	Artibeus planirostris	CYTB	EU160909	1140
	Artibeus planirostris	CYTB	EU160908	1140
	Artibeus planirostris	CYTB	EU160907	444
	Artibeus planirostris	CYTB	EU160906	432
	Artibeus planirostris	CYTB	EU160905	1140
	Artibeus planirostris	CYTB	EU160904	1140
	Artibeus planirostris	CYTB	EU160903	1140
	Artibeus planirostris	CYTB	EU160902	1140
	Artibeus planirostris	CYTB	EU160900	1140
	Artibeus planirostris	CYTB	EU160899	1140
	Artibeus planirostris	CYTB	EU160898	1140
	Artibeus planirostris	CYTB	EU160897	1140
	Artibeus planirostris	CYTB	EU160896	1140
	Artibeus planirostris	CYTB	EU160895	1140
	Artibeus planirostris	CYTB	EU160894	1140
	Artibeus planirostris	CYTB	EU160893	1140
	Artibeus planirostris	CYTB	EU160892	1140
	Artibeus planirostris	CYTB	EU160891	1140
	Artibeus planirostris	CYTB	EU160890	1140
	Artibeus planirostris	CYTB	EU160889	1140
	Artibeus planirostris	CYTB	EU160888	1140
	Artibeus planirostris	CYTB	EU160887	1140
	Artibeus planirostris	CYTB	EU160886	1140
	Artibeus planirostris	CYTB	EU160885	1140
	Artibeus planirostris	CYTB	EU160884	1140
	Artibeus planirostris	CYTB	EU160883	1140
	Artibeus planirostris	CYTB	EU160882	1140
	Artibeus planirostris	CYTB	EU160881	1140
	Artibeus planirostris	CYTB	EU160880	716
	Artibeus planirostris	CYTB	EU160879	716
	Artibeus planirostris	CYTB	EU160878	716
	Artibeus planirostris	CYTB	EU160877	716
	Artibeus planirostris	CYTB	EU160876	716
	Artibeus planirostris	CYTB	EU160875	716
	Artibeus planirostris	CYTB	EU160874	716
	Artibeus planirostris	CYTB	EU160873	716
	Artibeus planirostris	CYTB	EU160872	716
	Artibeus planirostris	CYTB	EU160871	716
	Artibeus planirostris	CYTB	EU160870	716
	Artibeus planirostris	CYTB	EU160869	716
	Artibeus planirostris	CYTB	EU160868	716
	Artibeus planirostris	CYTB	EU160867	632
	Artibeus planirostris	CYTB	EU160866	1140
	Artibeus planirostris	CYTB	AY642920	1140
	Artibeus planirostris	CYTB	AY642919	1140
	Artibeus planirostris	CYTB	AY642918	1140
	Artibeus planirostris	CYTB	AY642917	1140
	Artibeus planirostris	CYTB	AY642916	1140
	Artibeus planirostris	CYTB	AY642915	1140
	Artibeus planirostris	CYTB	AY642914	1140
	Artibeus planirostris	CYTB	AY642913	1140
	Artibeus schwartzi	CYTB	MH043364	594
	Artibeus schwartzi	CYTB	GQ861782	1140
	Artibeus schwartzi	CYTB	GQ861771	397
	Artibeus schwartzi	CYTB	GQ861762	451
	Artibeus schwartzi	CYTB	GQ861726	457
	Artibeus schwartzi	CYTB	GQ861722	1140
	Artibeus schwartzi	CYTB	GQ861632	441
	Artibeus schwartzi	CYTB	DQ869523	594
	Artibeus sp.	CYTB	DQ985503	761
	Artibeus amplus	COI	EF080025	657
	Artibeus amplus	COI	EF080026	657
	Artibeus amplus	COI	EF080029	654
	Artibeus amplus	COI	EU160973	501
	Artibeus amplus	COI	EU160974	501
	Artibeus amplus	COI	HQ545659	657
	Artibeus amplus	COI	JF447883	657
	Artibeus amplus	COI	JF447885	657
	Artibeus amplus	COI	JF447886	657
	Artibeus amplus	COI	JF447888	657
	Artibeus amplus	COI	JF447889	657
	Artibeus amplus	COI	JF447892	657
	Artibeus amplus	COI	JF447894	657
	Artibeus amplus	COI	JF447896	657
	Artibeus amplus	COI	JF447900	657
	Artibeus amplus	COI	JF447902	657
	Artibeus amplus	COI	JF447906	657
	Artibeus amplus	COI	JF447908	657
	Artibeus concolor	COI	EF080060	655
	Artibeus concolor	COI	EF080061	655
	Artibeus concolor	COI	EF080063	655
	Artibeus concolor	COI	EF080065	657
	Artibeus concolor	COI	EF080066	655
	Artibeus concolor	COI	EU096558	657
	Artibeus concolor	COI	EU160984	501
	Artibeus concolor	COI	HQ545553	657
	Artibeus concolor	COI	HQ545627	657
	Artibeus concolor	COI	HQ919665	657
	Artibeus concolor	COI	HQ919720	657
	Artibeus concolor	COI	JF447485	655
	Artibeus concolor	COI	JF447486	655
	Artibeus concolor	COI	JF452350	655
	Artibeus concolor	COI	JF452351	657
	Artibeus concolor	COI	JF452352	657
	Artibeus concolor	COI	JF452353	657
	Artibeus concolor	COI	JF452354	657
	Artibeus concolor	COI	JF452355	657
	Artibeus concolor	COI	JF452356	657
	Artibeus concolor	COI	JF452357	657
	Artibeus concolor	COI	JF452358	657
	Artibeus concolor	COI	JF452359	657
	Artibeus concolor	COI	JF452360	657
	Artibeus concolor	COI	JF452361	657
	Artibeus concolor	COI	JF452362	657
	Artibeus concolor	COI	JF452363	657
	Artibeus concolor	COI	JF452364	657
	Artibeus concolor	COI	JF452365	647
	Artibeus concolor	COI	JF452366	648
	Artibeus concolor	COI	JF452367	657
	Artibeus concolor	COI	JF452368	657
	Artibeus concolor	COI	JF452369	657
	Artibeus concolor	COI	JF452370	657
	Artibeus concolor	COI	JF452373	657
	Artibeus concolor	COI	JF452374	657
	Artibeus concolor	COI	JF452375	657
	Artibeus concolor	COI	JF452377	657
	Artibeus concolor	COI	JF452379	657
	Artibeus concolor	COI	JF452380	657
	Artibeus concolor	COI	JF452381	657
	Artibeus concolor	COI	JF452382	657
	Artibeus concolor	COI	JF452383	657
	Artibeus concolor	COI	JF452384	657
	Artibeus concolor	COI	JF452385	657
	Artibeus concolor	COI	JF452386	657
	Artibeus concolor	COI	JF452387	657
	Artibeus concolor	COI	JF452389	657
	Artibeus concolor	COI	JF452390	650
	Artibeus concolor	COI	JF452391	657
	Artibeus concolor	COI	JF452392	657
	Artibeus concolor	COI	JF452394	657
	Artibeus concolor	COI	JF452395	657
	Artibeus concolor	COI	JF452397	657
	Artibeus concolor	COI	JF452398	657
	Artibeus concolor	COI	JF452400	657
	Artibeus concolor	COI	JF452401	657
	Artibeus concolor	COI	JF452402	648
	Artibeus concolor	COI	JF452404	657
	Artibeus concolor	COI	JF452405	657
	Artibeus concolor	COI	JF452406	657
	Artibeus concolor	COI	JF452407	657
	Artibeus concolor	COI	JF452408	657
	Artibeus concolor	COI	JF452410	657
	Artibeus concolor	COI	JF452411	657
	Artibeus concolor	COI	JF452413	657
	Artibeus concolor	COI	JF452415	657
	Artibeus concolor	COI	JF452416	657
	Artibeus concolor	COI	JF452417	657
	Artibeus concolor	COI	JF452418	657
	Artibeus concolor	COI	JF452419	657
	Artibeus concolor	COI	KU295495	579
	Artibeus fimbriatus	COI	EU160987	501
	Artibeus fimbriatus	COI	EU160992	501
	Artibeus fimbriatus	COI	JF446310	657
	Artibeus fimbriatus	COI	JF446311	657
	Artibeus fimbriatus	COI	JF446312	654
	Artibeus fimbriatus	COI	OM920069	657
	Artibeus fimbriatus	COI	OM920071	657
	Artibeus fimbriatus	COI	OM920072	657
	Artibeus fimbriatus	COI	OM921006	657
	Artibeus fimbriatus	COI	OM921395	657
	Artibeus fraterculus	COI	EU160993	501
	Artibeus fraterculus	COI	EU160994	501
	Artibeus hartii	COI	EU161064	501
	Artibeus hartii	COI	JF447407	614
	Artibeus hartii	COI	JF447408	657
	Artibeus hartii	COI	JF447409	657
	Artibeus hartii	COI	065681	657
	Artibeus hartii	COI	ON321892	657
	Artibeus intermedius	COI	JF446451	657
	Artibeus intermedius	COI	JF446452	657
	Artibeus intermedius	COI	JF446453	657
	Artibeus intermedius	COI	JF446617	657
	Artibeus intermedius	COI	JF446619	657
	Artibeus intermedius	COI	JF446940	657
	Artibeus intermedius	COI	JF446941	657
	Artibeus intermedius	COI	JF446942	558
	Artibeus intermedius	COI	JF446948	657
	Artibeus intermedius	COI	JF446950	657
	Artibeus intermedius	COI	JF446951	657
	Artibeus intermedius	COI	JF446952	657
	Artibeus intermedius	COI	JF446953	657
	Artibeus intermedius	COI	JF446956	657
	Artibeus intermedius	COI	JF446958	657
	Artibeus intermedius	COI	JF446959	657
	Artibeus intermedius	COI	JF446963	657
	Artibeus intermedius	COI	JF446964	657
	Artibeus intermedius	COI	JF446965	657
	Artibeus intermedius	COI	JF446967	657
	Artibeus intermedius	COI	JF446968	655
	Artibeus intermedius	COI	JF446969	657
	Artibeus intermedius	COI	JF446970	657
	Artibeus intermedius	COI	JF446971	657
	Artibeus intermedius	COI	JF446972	657
	Artibeus intermedius	COI	JF446973	657
	Artibeus intermedius	COI	JF446976	657
	Artibeus intermedius	COI	JF446978	657
	Artibeus intermedius	COI	JF446983	657
	Artibeus intermedius	COI	JF446987	657
	Artibeus intermedius	COI	JF446988	657
	Artibeus intermedius	COI	JF446989	657
	Artibeus intermedius	COI	JF446991	657
	Artibeus intermedius	COI	JF447010	657
	Artibeus intermedius	COI	JF447012	657
	Artibeus intermedius	COI	JF447014	657
	Artibeus intermedius	COI	JF447018	657
	Artibeus intermedius	COI	JF447020	657
	Artibeus intermedius	COI	JF447021	657
	Artibeus intermedius	COI	JF447023	657
	Artibeus intermedius	COI	JF447024	657
	Artibeus intermedius	COI	JF447025	657
	Artibeus intermedius	COI	JF447026	657
	Artibeus intermedius	COI	JF447028	657
	Artibeus intermedius	COI	JF447029	596
	Artibeus intermedius	COI	JF447032	610
	Artibeus intermedius	COI	JF447034	657
	Artibeus intermedius	COI	JF447940	657
	Artibeus intermedius	COI	JF447941	657
	Artibeus intermedius	COI	JF447943	657
	Artibeus jamaicensis	COI	AF061340	657
	Artibeus jamaicensis	COI	HQ625001	410
	Artibeus jamaicensis	COI	JF446454	657
	Artibeus jamaicensis	COI	JF446455	657
	Artibeus jamaicensis	COI	JF446456	656
	Artibeus jamaicensis	COI	JF446458	657
	Artibeus jamaicensis	COI	JF446460	657
	Artibeus jamaicensis	COI	JF446569	638
	Artibeus jamaicensis	COI	JF446570	657
	Artibeus jamaicensis	COI	JF446571	657
	Artibeus jamaicensis	COI	JF446625	657
	Artibeus jamaicensis	COI	JF446626	657
	Artibeus jamaicensis	COI	JF446629	657
	Artibeus jamaicensis	COI	JF446635	657
	Artibeus jamaicensis	COI	JF446637	657
	Artibeus jamaicensis	COI	JF446639	657
	Artibeus jamaicensis	COI	JF446640	657
	Artibeus jamaicensis	COI	JF446646	657
	Artibeus jamaicensis	COI	JF446647	657
	Artibeus jamaicensis	COI	JF447042	638
	Artibeus jamaicensis	COI	JF447049	657
	Artibeus jamaicensis	COI	JF447050	647
	Artibeus jamaicensis	COI	JF447054	657
	Artibeus jamaicensis	COI	JF447057	657
	Artibeus jamaicensis	COI	JF447058	657
	Artibeus jamaicensis	COI	JF447061	647
	Artibeus jamaicensis	COI	JF447062	657
	Artibeus jamaicensis	COI	JF447063	657
	Artibeus jamaicensis	COI	JF447064	657
	Artibeus jamaicensis	COI	JF447065	657
	Artibeus jamaicensis	COI	JF447066	657
	Artibeus jamaicensis	COI	JF447068	657
	Artibeus jamaicensis	COI	JF447069	657
	Artibeus jamaicensis	COI	JF447071	657
	Artibeus jamaicensis	COI	JF447072	657
	Artibeus jamaicensis	COI	JF447341	657
	Artibeus jamaicensis	COI	JF447344	657
	Artibeus jamaicensis	COI	JF447346	657
	Artibeus jamaicensis	COI	JF447348	657
	Artibeus jamaicensis	COI	JF447349	657
	Artibeus jamaicensis	COI	JF447350	657
	Artibeus jamaicensis	COI	JF447945	655
	Artibeus jamaicensis	COI	JF459373	657
	Artibeus jamaicensis	COI	JF459374	657
	Artibeus jamaicensis	COI	JF459375	657
	Artibeus jamaicensis	COI	JF459376	657
	Artibeus jamaicensis	COI	JF498911	657
	Artibeus jamaicensis	COI	JF498912	657
	Artibeus jamaicensis	COI	KX354999	657
	Artibeus jamaicensis	COI	KX355005	657
	Artibeus jamaicensis	COI	KX755889	201
	Artibeus jamaicensis	COI	MG191787	549
	Artibeus jamaicensis	COI	MG191791	644
	Artibeus jamaicensis	COI	MG191796	636
	Artibeus jamaicensis	COI	MG191802	641
	Artibeus jamaicensis	COI	MG191832	623
	Artibeus jamaicensis	COI	MG191833	638
	Artibeus jamaicensis	COI	MG191834	652
	Artibeus jamaicensis	COI	MG191858	552
	Artibeus jamaicensis	COI	MG191860	482
	Artibeus jamaicensis	COI	MG191886	618
	Artibeus jamaicensis	COI	002009	657
	Artibeus jamaicensis	COI	ON357726	657
	Artibeus lituratus	COI	EF080084	657
	Artibeus lituratus	COI	EF080086	657
	Artibeus lituratus	COI	EF080092	657
	Artibeus lituratus	COI	EF080095	657
	Artibeus lituratus	COI	EF080097	657
	Artibeus lituratus	COI	EF080098	655
	Artibeus lituratus	COI	EF080099	638
	Artibeus lituratus	COI	EF080102	655
	Artibeus lituratus	COI	EF080103	657
	Artibeus lituratus	COI	EF080104	657
	Artibeus lituratus	COI	EF080105	657
	Artibeus lituratus	COI	EU096563	657
	Artibeus lituratus	COI	EU096565	657
	Artibeus lituratus	COI	EU096567	657
	Artibeus lituratus	COI	EU096568	657
	Artibeus lituratus	COI	EU096572	657
	Artibeus lituratus	COI	EU096575	657
	Artibeus lituratus	COI	EU096577	642
	Artibeus lituratus	COI	EU096581	657
	Artibeus lituratus	COI	EU161013	501
	Artibeus lituratus	COI	EU161017	501
	Artibeus lituratus	COI	EU161019	501
	Artibeus lituratus	COI	EU161023	501
	Artibeus lituratus	COI	EU161027	501
	Artibeus lituratus	COI	EU161028	501
	Artibeus lituratus	COI	EU161030	501
	Artibeus lituratus	COI	EU161031	501
	Artibeus lituratus	COI	HQ545463	657
	Artibeus lituratus	COI	HQ545478	657
	Artibeus lituratus	COI	HQ545599	657
	Artibeus lituratus	COI	HQ624999	410
	Artibeus lituratus	COI	JF445316	657
	Artibeus lituratus	COI	JF446314	656
	Artibeus lituratus	COI	JF446315	657
	Artibeus lituratus	COI	JF446332	657
	Artibeus lituratus	COI	JF446334	657
	Artibeus lituratus	COI	JF446337	657
	Artibeus lituratus	COI	JF446338	657
	Artibeus lituratus	COI	JF446339	657
	Artibeus lituratus	COI	JF446340	657
	Artibeus lituratus	COI	JF446343	636
	Artibeus lituratus	COI	JF446346	657
	Artibeus lituratus	COI	JF446348	657
	Artibeus lituratus	COI	JF446573	657
	Artibeus lituratus	COI	JF446574	657
	Artibeus lituratus	COI	JF446654	657
	Artibeus lituratus	COI	JF446656	657
	Artibeus lituratus	COI	JF446658	657
	Artibeus lituratus	COI	JF446660	657
	Artibeus lituratus	COI	JF446661	657
	Artibeus lituratus	COI	JF446662	657
	Artibeus lituratus	COI	JF446663	657
	Artibeus lituratus	COI	JF446664	657
	Artibeus lituratus	COI	JF446666	657
	Artibeus lituratus	COI	JF446670	657
	Artibeus lituratus	COI	JF446675	657
	Artibeus lituratus	COI	JF446676	657
	Artibeus lituratus	COI	JF446677	657
	Artibeus lituratus	COI	JF446679	657
	Artibeus lituratus	COI	JF447077	657
	Artibeus lituratus	COI	JF447078	657
	Artibeus lituratus	COI	JF447080	657
	Artibeus lituratus	COI	JF447082	657
	Artibeus lituratus	COI	JF447083	657
	Artibeus lituratus	COI	JF447084	656
	Artibeus lituratus	COI	JF447087	657
	Artibeus lituratus	COI	JF447090	657
	Artibeus lituratus	COI	JF447091	657
	Artibeus lituratus	COI	JF447092	657
	Artibeus lituratus	COI	JF447093	657
	Artibeus lituratus	COI	JF447094	657
	Artibeus lituratus	COI	JF447095	657
	Artibeus lituratus	COI	JF447096	657
	Artibeus lituratus	COI	JF447097	638
	Artibeus lituratus	COI	JF447098	657
	Artibeus lituratus	COI	JF447099	657
	Artibeus lituratus	COI	JF447102	657
	Artibeus lituratus	COI	JF447107	657
	Artibeus lituratus	COI	JF447109	657
	Artibeus lituratus	COI	JF447110	657
	Artibeus lituratus	COI	JF447114	657
	Artibeus lituratus	COI	JF447115	657
	Artibeus lituratus	COI	JF447117	657
	Artibeus lituratus	COI	JF447118	657
	Artibeus lituratus	COI	JF447119	657
	Artibeus lituratus	COI	JF447123	657
	Artibeus lituratus	COI	JF447132	657
	Artibeus lituratus	COI	JF447140	657
	Artibeus lituratus	COI	JF447351	657
	Artibeus lituratus	COI	JF447352	657
	Artibeus lituratus	COI	JF447492	655
	Artibeus lituratus	COI	JF447496	657
	Artibeus lituratus	COI	JF447501	657
	Artibeus lituratus	COI	JF447503	657
	Artibeus lituratus	COI	JF447506	657
	Artibeus lituratus	COI	JF447508	657
	Artibeus lituratus	COI	JF447510	657
	Artibeus lituratus	COI	JF447511	645
	Artibeus lituratus	COI	JF447513	653
	Artibeus lituratus	COI	JF447516	657
	Artibeus lituratus	COI	JF447517	657
	Artibeus lituratus	COI	JF447521	657
	Artibeus lituratus	COI	JF447523	657
	Artibeus lituratus	COI	JF448572	657
	Artibeus lituratus	COI	JF448573	657
	Artibeus lituratus	COI	JF448574	657
	Artibeus lituratus	COI	JF448580	657
	Artibeus lituratus	COI	JF448582	657
	Artibeus lituratus	COI	JF448584	638
	Artibeus lituratus	COI	JF448585	657
	Artibeus lituratus	COI	JF448588	655
	Artibeus lituratus	COI	JF448589	657
	Artibeus lituratus	COI	JF448590	657
	Artibeus lituratus	COI	JF448591	657
	Artibeus lituratus	COI	JF448593	657
	Artibeus lituratus	COI	JF448594	657
	Artibeus lituratus	COI	JF452526	657
	Artibeus lituratus	COI	JF452527	657
	Artibeus lituratus	COI	JF452533	657
	Artibeus lituratus	COI	JF452534	657
	Artibeus lituratus	COI	JF452537	657
	Artibeus lituratus	COI	JF452538	657
	Artibeus lituratus	COI	JF452539	657
	Artibeus lituratus	COI	JF452541	657
	Artibeus lituratus	COI	JF452552	657
	Artibeus lituratus	COI	JF452554	657
	Artibeus lituratus	COI	JF452556	657
	Artibeus lituratus	COI	JF452557	657
	Artibeus lituratus	COI	JF452559	655
	Artibeus lituratus	COI	JF452560	657
	Artibeus lituratus	COI	JF452564	657
	Artibeus lituratus	COI	JF452572	657
	Artibeus lituratus	COI	JF452576	657
	Artibeus lituratus	COI	JF452581	657
	Artibeus lituratus	COI	JF452583	657
	Artibeus lituratus	COI	JF452588	656
	Artibeus lituratus	COI	JF452591	657
	Artibeus lituratus	COI	JF452593	657
	Artibeus lituratus	COI	JF452597	657
	Artibeus lituratus	COI	JF452598	657
	Artibeus lituratus	COI	JF452602	657
	Artibeus lituratus	COI	JF452603	657
	Artibeus lituratus	COI	JF452610	648
	Artibeus lituratus	COI	JF452612	644
	Artibeus lituratus	COI	JF452615	657
	Artibeus lituratus	COI	JF452616	657
	Artibeus lituratus	COI	JF452620	657
	Artibeus lituratus	COI	JF452622	657
	Artibeus lituratus	COI	JF452623	657
	Artibeus lituratus	COI	JF452626	657
	Artibeus lituratus	COI	JF452627	657
	Artibeus lituratus	COI	JF452628	657
	Artibeus lituratus	COI	JF452630	657
	Artibeus lituratus	COI	JF452631	657
	Artibeus lituratus	COI	JF452633	657
	Artibeus lituratus	COI	JF452635	657
	Artibeus lituratus	COI	JF452636	657
	Artibeus lituratus	COI	JF452641	657
	Artibeus lituratus	COI	JF452645	657
	Artibeus lituratus	COI	JF452650	657
	Artibeus lituratus	COI	JF452655	657
	Artibeus lituratus	COI	JF452656	657
	Artibeus lituratus	COI	JF452657	657
	Artibeus lituratus	COI	JF452659	657
	Artibeus lituratus	COI	JF452663	657
	Artibeus lituratus	COI	JF452664	657
	Artibeus lituratus	COI	JF452665	657
	Artibeus lituratus	COI	JF452666	657
	Artibeus lituratus	COI	JF452667	657
	Artibeus lituratus	COI	JF452683	657
	Artibeus lituratus	COI	JF452684	657
	Artibeus lituratus	COI	JF452685	657
	Artibeus lituratus	COI	JF452686	657
	Artibeus lituratus	COI	JF452691	657
	Artibeus lituratus	COI	JF452697	657
	Artibeus lituratus	COI	JF452698	657
	Artibeus lituratus	COI	JF452702	657
	Artibeus lituratus	COI	JF452703	654
	Artibeus lituratus	COI	JF452704	657
	Artibeus lituratus	COI	JF452705	657
	Artibeus lituratus	COI	JF452706	657
	Artibeus lituratus	COI	JF452707	657
	Artibeus lituratus	COI	JF452718	657
	Artibeus lituratus	COI	JF452721	657
	Artibeus lituratus	COI	JF452723	657
	Artibeus lituratus	COI	JF452724	657
	Artibeus lituratus	COI	JF452726	657
	Artibeus lituratus	COI	JF452729	657
	Artibeus lituratus	COI	JF452730	656
	Artibeus lituratus	COI	JF452733	656
	Artibeus lituratus	COI	JF452737	657
	Artibeus lituratus	COI	JF452739	657
	Artibeus lituratus	COI	JF452742	657
	Artibeus lituratus	COI	JF452743	657
	Artibeus lituratus	COI	JF452744	657
	Artibeus lituratus	COI	JF452749	657
	Artibeus lituratus	COI	JF452753	657
	Artibeus lituratus	COI	JF452754	657
	Artibeus lituratus	COI	JF452755	638
	Artibeus lituratus	COI	JF452758	657
	Artibeus lituratus	COI	JF452759	657
	Artibeus lituratus	COI	JF452762	657
	Artibeus lituratus	COI	JF452763	657
	Artibeus lituratus	COI	JF452766	657
	Artibeus lituratus	COI	JF452770	657
	Artibeus lituratus	COI	JF452772	657
	Artibeus lituratus	COI	JF452775	657
	Artibeus lituratus	COI	JF452777	657
	Artibeus lituratus	COI	JF452779	657
	Artibeus lituratus	COI	JF452781	657
	Artibeus lituratus	COI	JF452789	657
	Artibeus lituratus	COI	JF452791	657
	Artibeus lituratus	COI	JF452792	657
	Artibeus lituratus	COI	JF452796	657
	Artibeus lituratus	COI	JF452798	657
	Artibeus lituratus	COI	JF452799	657
	Artibeus lituratus	COI	JF452800	638
	Artibeus lituratus	COI	JF452805	657
	Artibeus lituratus	COI	JF452806	657
	Artibeus lituratus	COI	JF452810	657
	Artibeus lituratus	COI	JF452812	657
	Artibeus lituratus	COI	JF452817	657
	Artibeus lituratus	COI	JF452818	635
	Artibeus lituratus	COI	JF452819	638
	Artibeus lituratus	COI	JF452824	639
	Artibeus lituratus	COI	JF452825	657
	Artibeus lituratus	COI	JF452826	657
	Artibeus lituratus	COI	JF452827	648
	Artibeus lituratus	COI	JF452828	657
	Artibeus lituratus	COI	JF452833	657
	Artibeus lituratus	COI	JF452837	657
	Artibeus lituratus	COI	JF452838	655
	Artibeus lituratus	COI	JF452840	657
	Artibeus lituratus	COI	JF452841	657
	Artibeus lituratus	COI	JF452850	657
	Artibeus lituratus	COI	JF452853	657
	Artibeus lituratus	COI	JF452856	657
	Artibeus lituratus	COI	JF452858	657
	Artibeus lituratus	COI	JF452861	657
	Artibeus lituratus	COI	JF452863	657
	Artibeus lituratus	COI	JF452865	657
	Artibeus lituratus	COI	JF452866	657
	Artibeus lituratus	COI	JF452870	657
	Artibeus lituratus	COI	JF452872	657
	Artibeus lituratus	COI	JF452875	657
	Artibeus lituratus	COI	JF452876	657
	Artibeus lituratus	COI	JF452879	657
	Artibeus lituratus	COI	JF452880	657
	Artibeus lituratus	COI	JF452881	657
	Artibeus lituratus	COI	JF452882	657
	Artibeus lituratus	COI	JF452883	657
	Artibeus lituratus	COI	JF452885	657
	Artibeus lituratus	COI	JF459081	657
	Artibeus lituratus	COI	JF498921	657
	Artibeus lituratus	COI	JN209840	657
	Artibeus lituratus	COI	JQ600004	656
	Artibeus lituratus	COI	JQ601182	657
	Artibeus lituratus	COI	KU295488	579
	Artibeus lituratus	COI	MG191805	652
	Artibeus lituratus	COI	MG191818	641
	Artibeus lituratus	COI	MG191859	557
	Artibeus lituratus	COI	MK749466	657
	Artibeus lituratus	COI	MK749467	657
	Artibeus lituratus	COI	MK749468	657
	Artibeus lituratus	COI	MK749469	657
	Artibeus lituratus	COI	MK749470	657
	Artibeus lituratus	COI	MK749471	657
	Artibeus lituratus	COI	MK749472	657
	Artibeus lituratus	COI	MK749473	657
	Artibeus lituratus	COI	MK749474	657
	Artibeus lituratus	COI	MK749475	657
	Artibeus lituratus	COI	MK749478	657
	Artibeus lituratus	COI	016871	657
	Artibeus lituratus	COI	OK398131	657
	Artibeus lituratus	COI	OK398132	622
	Artibeus lituratus	COI	OK398133	656
	Artibeus lituratus	COI	OK398134	657
	Artibeus lituratus	COI	OK398135	639
	Artibeus lituratus	COI	OK398136	521
	Artibeus lituratus	COI	OK398137	573
	Artibeus lituratus	COI	OL455610	657
	Artibeus lituratus	COI	OL455611	657
	Artibeus lituratus	COI	OL455612	631
	Artibeus lituratus	COI	OM181933	574
	Artibeus lituratus	COI	OM957497	657
	Artibeus lituratus	COI	OM957540	657
	Artibeus lituratus	COI	OM959229	657
	Artibeus lituratus	COI	OM960560	657
	Artibeus lituratus	COI	OM960967	657
	Artibeus lituratus	COI	OM960970	657
	Artibeus lituratus	COI	OM960971	657
	Artibeus lituratus	COI	OM960972	657
	Artibeus lituratus	COI	OM961046	657
	Artibeus lituratus	COI	ON357725	657
	Artibeus obscurus	COI	EF080106	657
	Artibeus obscurus	COI	EF080107	657
	Artibeus obscurus	COI	EF080108	651
	Artibeus obscurus	COI	EF080110	657
	Artibeus obscurus	COI	EF080111	657
	Artibeus obscurus	COI	EF080112	657
	Artibeus obscurus	COI	EF080113	657
	Artibeus obscurus	COI	EF080116	657
	Artibeus obscurus	COI	EF080117	657
	Artibeus obscurus	COI	EU096585	657
	Artibeus obscurus	COI	EU096593	657
	Artibeus obscurus	COI	EU096595	608
	Artibeus obscurus	COI	EU161034	501
	Artibeus obscurus	COI	EU161035	501
	Artibeus obscurus	COI	EU161036	501
	Artibeus obscurus	COI	EU161037	501
	Artibeus obscurus	COI	EU161038	501
	Artibeus obscurus	COI	EU161039	501
	Artibeus obscurus	COI	EU161040	501
	Artibeus obscurus	COI	EU161041	501
	Artibeus obscurus	COI	EU161042	501
	Artibeus obscurus	COI	EU161043	501
	Artibeus obscurus	COI	EU161044	501
	Artibeus obscurus	COI	HQ545508	657
	Artibeus obscurus	COI	HQ545513	657
	Artibeus obscurus	COI	HQ545552	657
	Artibeus obscurus	COI	HQ545633	657
	Artibeus obscurus	COI	HQ545665	657
	Artibeus obscurus	COI	HQ919672	657
	Artibeus obscurus	COI	JF447535	657
	Artibeus obscurus	COI	JF447538	657
	Artibeus obscurus	COI	JF447778	657
	Artibeus obscurus	COI	JF447779	657
	Artibeus obscurus	COI	JF448610	657
	Artibeus obscurus	COI	JF448613	657
	Artibeus obscurus	COI	JF448614	657
	Artibeus obscurus	COI	JF448626	657
	Artibeus obscurus	COI	JF448632	657
	Artibeus obscurus	COI	JF448634	657
	Artibeus obscurus	COI	JF448635	657
	Artibeus obscurus	COI	JF448637	657
	Artibeus obscurus	COI	JF448638	657
	Artibeus obscurus	COI	JF452886	657
	Artibeus obscurus	COI	JF452905	657
	Artibeus obscurus	COI	JF452906	657
	Artibeus obscurus	COI	JF452908	657
	Artibeus obscurus	COI	JF452912	657
	Artibeus obscurus	COI	JF452914	657
	Artibeus obscurus	COI	JF452916	657
	Artibeus obscurus	COI	JF452919	657
	Artibeus obscurus	COI	JF452925	657
	Artibeus obscurus	COI	JF452927	657
	Artibeus obscurus	COI	JF452943	657
	Artibeus obscurus	COI	JF452956	657
	Artibeus obscurus	COI	JF452976	657
	Artibeus obscurus	COI	JF453004	657
	Artibeus obscurus	COI	JF453011	651
	Artibeus obscurus	COI	JF453012	657
	Artibeus obscurus	COI	JF453026	657
	Artibeus obscurus	COI	JF453029	657
	Artibeus obscurus	COI	JF453035	657
	Artibeus obscurus	COI	JF453053	657
	Artibeus obscurus	COI	JF453061	657
	Artibeus obscurus	COI	JF453062	657
	Artibeus obscurus	COI	JF453064	657
	Artibeus obscurus	COI	JF453066	657
	Artibeus obscurus	COI	JF453103	657
	Artibeus obscurus	COI	JF453104	657
	Artibeus obscurus	COI	JF453118	657
	Artibeus obscurus	COI	JF453127	657
	Artibeus obscurus	COI	JF453134	657
	Artibeus obscurus	COI	JF453139	657
	Artibeus obscurus	COI	JF453156	657
	Artibeus obscurus	COI	JF453161	657
	Artibeus obscurus	COI	JF453163	657
	Artibeus obscurus	COI	JF453172	657
	Artibeus obscurus	COI	JF453177	657
	Artibeus obscurus	COI	JF453180	657
	Artibeus obscurus	COI	JF453194	657
	Artibeus obscurus	COI	JF453209	657
	Artibeus obscurus	COI	JF453219	657
	Artibeus obscurus	COI	JF453228	657
	Artibeus obscurus	COI	JF453231	657
	Artibeus obscurus	COI	JF453232	657
	Artibeus obscurus	COI	JF453237	657
	Artibeus obscurus	COI	JF453266	657
	Artibeus obscurus	COI	JF453268	657
	Artibeus obscurus	COI	JF453275	657
	Artibeus obscurus	COI	JF453285	657
	Artibeus obscurus	COI	JF453286	604
	Artibeus obscurus	COI	JF453295	657
	Artibeus obscurus	COI	JF453298	657
	Artibeus obscurus	COI	JF453299	657
	Artibeus obscurus	COI	JF453307	657
	Artibeus obscurus	COI	JF459086	649
	Artibeus obscurus	COI	JQ601166	657
	Artibeus obscurus	COI	JQ601233	657
	Artibeus obscurus	COI	JQ601296	657
	Artibeus obscurus	COI	JQ601351	538
	Artibeus obscurus	COI	JQ601393	657
	Artibeus obscurus	COI	KU295489	579
	Artibeus obscurus	COI	MG704548	618
	Artibeus obscurus	COI	MG704550	618
	Artibeus obscurus	COI	MG704551	618
	Artibeus obscurus	COI	MG704552	618
	Artibeus obscurus	COI	MG704553	618
	Artibeus obscurus	COI	MG704554	618
	Artibeus obscurus	COI	MG704559	618
	Artibeus obscurus	COI	MG704560	618
	Artibeus obscurus	COI	MG704561	618
	Artibeus obscurus	COI	MG704562	618
	Artibeus obscurus	COI	MG704563	618
	Artibeus obscurus	COI	MG704565	618
	Artibeus obscurus	COI	MG704566	618
	Artibeus obscurus	COI	MG704567	618
	Artibeus obscurus	COI	MG704570	617
	Artibeus phaeotis	COI	HM208651	412
	Artibeus phaeotis	COI	JF446683	657
	Artibeus phaeotis	COI	JF446693	657
	Artibeus phaeotis	COI	JF446694	657
	Artibeus phaeotis	COI	JF446696	657
	Artibeus phaeotis	COI	JF446697	657
	Artibeus phaeotis	COI	JF446699	657
	Artibeus phaeotis	COI	JF446701	657
	Artibeus phaeotis	COI	JF446702	657
	Artibeus phaeotis	COI	JF447145	657
	Artibeus phaeotis	COI	JF447149	614
	Artibeus phaeotis	COI	JF447152	643
	Artibeus phaeotis	COI	JF447154	657
	Artibeus phaeotis	COI	JF447155	657
	Artibeus phaeotis	COI	JF447156	657
	Artibeus phaeotis	COI	JF447163	657
	Artibeus phaeotis	COI	JF447166	657
	Artibeus phaeotis	COI	JF447172	657
	Artibeus phaeotis	COI	JF447177	642
	Artibeus phaeotis	COI	JF447178	657
	Artibeus phaeotis	COI	JF498924	657
	Artibeus phaeotis	COI	JF498925	657
	Artibeus phaeotis	COI	JF498928	657
	Artibeus phaeotis	COI	JF498930	657
	Artibeus phaeotis	COI	JF498940	657
	Artibeus phaeotis	COI	JF498945	657
	Artibeus phaeotis	COI	JF498953	657
	Artibeus phaeotis	COI	JQ601636	657
	Artibeus phaeotis	COI	JQ601641	657
	Artibeus phaeotis	COI	JQ601642	657
	Artibeus phaeotis	COI	JQ601643	657
	Artibeus phaeotis	COI	JQ601649	657
	Artibeus planirostris	COI	EF080146	657
	Artibeus planirostris	COI	EF080148	657
	Artibeus planirostris	COI	EF080150	657
	Artibeus planirostris	COI	EF080151	638
	Artibeus planirostris	COI	EF080156	657
	Artibeus planirostris	COI	EF080157	657
	Artibeus planirostris	COI	EF080158	657
	Artibeus planirostris	COI	EF080159	657
	Artibeus planirostris	COI	EF080160	657
	Artibeus planirostris	COI	EF080161	657
	Artibeus planirostris	COI	EF080162	657
	Artibeus planirostris	COI	EU096597	657
	Artibeus planirostris	COI	EU096602	657
	Artibeus planirostris	COI	EU096605	657
	Artibeus planirostris	COI	EU096608	657
	Artibeus planirostris	COI	EU096609	657
	Artibeus planirostris	COI	EU096612	657
	Artibeus planirostris	COI	EU096617	624
	Artibeus planirostris	COI	EU096623	657
	Artibeus planirostris	COI	EU096625	657
	Artibeus planirostris	COI	EU161047	501
	Artibeus planirostris	COI	EU161048	501
	Artibeus planirostris	COI	EU161049	501
	Artibeus planirostris	COI	EU161051	501
	Artibeus planirostris	COI	EU161053	501
	Artibeus planirostris	COI	EU161056	501
	Artibeus planirostris	COI	EU161057	501
	Artibeus planirostris	COI	EU161059	501
	Artibeus planirostris	COI	EU161062	501
	Artibeus planirostris	COI	EU161063	501
	Artibeus planirostris	COI	HQ545539	657
	Artibeus planirostris	COI	HQ545591	657
	Artibeus planirostris	COI	JF447548	657
	Artibeus planirostris	COI	JF447549	657
	Artibeus planirostris	COI	JF447553	656
	Artibeus planirostris	COI	JF447554	655
	Artibeus planirostris	COI	JF447557	657
	Artibeus planirostris	COI	JF447561	657
	Artibeus planirostris	COI	JF447562	657
	Artibeus planirostris	COI	JF447781	657
	Artibeus planirostris	COI	JF447782	657
	Artibeus planirostris	COI	JF447783	657
	Artibeus planirostris	COI	JF447950	657
	Artibeus planirostris	COI	JF447952	657
	Artibeus planirostris	COI	JF447955	657
	Artibeus planirostris	COI	JF447956	638
	Artibeus planirostris	COI	JF447957	657
	Artibeus planirostris	COI	JF448641	652
	Artibeus planirostris	COI	JF448642	657
	Artibeus planirostris	COI	JF448643	657
	Artibeus planirostris	COI	JF448644	657
	Artibeus planirostris	COI	JF448645	657
	Artibeus planirostris	COI	JF448649	657
	Artibeus planirostris	COI	JF448650	657
	Artibeus planirostris	COI	JF448651	657
	Artibeus planirostris	COI	JF448652	657
	Artibeus planirostris	COI	JF448653	657
	Artibeus planirostris	COI	JF448654	657
	Artibeus planirostris	COI	JF448655	657
	Artibeus planirostris	COI	JF448656	657
	Artibeus planirostris	COI	JF448658	657
	Artibeus planirostris	COI	JF448659	657
	Artibeus planirostris	COI	JF448660	657
	Artibeus planirostris	COI	JF448664	657
	Artibeus planirostris	COI	JF448665	657
	Artibeus planirostris	COI	JF448666	657
	Artibeus planirostris	COI	JF448667	657
	Artibeus planirostris	COI	JF448668	657
	Artibeus planirostris	COI	JF448669	657
	Artibeus planirostris	COI	JF448670	657
	Artibeus planirostris	COI	JF448671	655
	Artibeus planirostris	COI	JF448676	657
	Artibeus planirostris	COI	JF448677	657
	Artibeus planirostris	COI	JF448679	657
	Artibeus planirostris	COI	JF448680	657
	Artibeus planirostris	COI	JF448681	657
	Artibeus planirostris	COI	JF453308	657
	Artibeus planirostris	COI	JF453312	657
	Artibeus planirostris	COI	JF453325	657
	Artibeus planirostris	COI	JF453329	657
	Artibeus planirostris	COI	JF453331	657
	Artibeus planirostris	COI	JF453332	657
	Artibeus planirostris	COI	JF453335	657
	Artibeus planirostris	COI	JF453349	657
	Artibeus planirostris	COI	JF453351	657
	Artibeus planirostris	COI	JF453352	657
	Artibeus planirostris	COI	JF453356	652
	Artibeus planirostris	COI	JF453358	657
	Artibeus planirostris	COI	JF453360	657
	Artibeus planirostris	COI	JF453368	653
	Artibeus planirostris	COI	JF453369	657
	Artibeus planirostris	COI	JF453373	657
	Artibeus planirostris	COI	JF453374	657
	Artibeus planirostris	COI	JF453375	657
	Artibeus planirostris	COI	JF453376	657
	Artibeus planirostris	COI	JF453377	657
	Artibeus planirostris	COI	JF453378	657
	Artibeus planirostris	COI	JF453387	655
	Artibeus planirostris	COI	JF453397	657
	Artibeus planirostris	COI	JF453400	657
	Artibeus planirostris	COI	JF453403	657
	Artibeus planirostris	COI	JF453404	657
	Artibeus planirostris	COI	JF453410	657
	Artibeus planirostris	COI	JF453413	657
	Artibeus planirostris	COI	JF453416	657
	Artibeus planirostris	COI	JF453419	657
	Artibeus planirostris	COI	JF453424	657
	Artibeus planirostris	COI	JF453427	657
	Artibeus planirostris	COI	JF453435	657
	Artibeus planirostris	COI	JF453447	657
	Artibeus planirostris	COI	JF453448	657
	Artibeus planirostris	COI	JF453455	657
	Artibeus planirostris	COI	JF453464	657
	Artibeus planirostris	COI	JF453476	657
	Artibeus planirostris	COI	JF453477	657
	Artibeus planirostris	COI	JF453480	657
	Artibeus planirostris	COI	JF453486	657
	Artibeus planirostris	COI	JF453487	657
	Artibeus planirostris	COI	JF453489	657
	Artibeus planirostris	COI	JF453491	638
	Artibeus planirostris	COI	JF453493	657
	Artibeus planirostris	COI	JF453496	657
	Artibeus planirostris	COI	JF453497	657
	Artibeus planirostris	COI	JF453499	657
	Artibeus planirostris	COI	JF453503	657
	Artibeus planirostris	COI	JF453505	657
	Artibeus planirostris	COI	JF453509	657
	Artibeus planirostris	COI	JF453512	657
	Artibeus planirostris	COI	JF453513	657
	Artibeus planirostris	COI	JF453515	657
	Artibeus planirostris	COI	JF453516	657
	Artibeus planirostris	COI	JF453517	657
	Artibeus planirostris	COI	JF453518	657
	Artibeus planirostris	COI	JF453519	657
	Artibeus planirostris	COI	JF453526	657
	Artibeus planirostris	COI	JF453527	657
	Artibeus planirostris	COI	JF453532	657
	Artibeus planirostris	COI	JF453537	657
	Artibeus planirostris	COI	JF453541	657
	Artibeus planirostris	COI	JF453554	657
	Artibeus planirostris	COI	JF453556	657
	Artibeus planirostris	COI	JF453559	657
	Artibeus planirostris	COI	JF453560	657
	Artibeus planirostris	COI	JF453566	657
	Artibeus planirostris	COI	JF453570	636
	Artibeus planirostris	COI	JF453578	657
	Artibeus planirostris	COI	JF453586	648
	Artibeus planirostris	COI	JF453588	657
	Artibeus planirostris	COI	JF453589	657
	Artibeus planirostris	COI	JF453595	657
	Artibeus planirostris	COI	JF453602	657
	Artibeus planirostris	COI	JF453604	657
	Artibeus planirostris	COI	JF453608	657
	Artibeus planirostris	COI	JF453612	657
	Artibeus planirostris	COI	JF453613	657
	Artibeus planirostris	COI	JF453614	657
	Artibeus planirostris	COI	JF453618	657
	Artibeus planirostris	COI	JF453619	657
	Artibeus planirostris	COI	JF453621	655
	Artibeus planirostris	COI	JF453627	637
	Artibeus planirostris	COI	JF453641	657
	Artibeus planirostris	COI	JF453643	657
	Artibeus planirostris	COI	JF453646	657
	Artibeus planirostris	COI	JF453649	657
	Artibeus planirostris	COI	JF453656	657
	Artibeus planirostris	COI	JF453661	657
	Artibeus planirostris	COI	JN312369	606
	Artibeus planirostris	COI	JQ600005	657
	Artibeus planirostris	COI	JQ601098	657
	Artibeus planirostris	COI	JQ601112	657
	Artibeus planirostris	COI	JQ601139	637
	Artibeus planirostris	COI	JQ601145	636
	Artibeus planirostris	COI	JQ601147	649
	Artibeus planirostris	COI	JQ601169	641
	Artibeus planirostris	COI	JQ601171	646
	Artibeus planirostris	COI	JQ601232	657
	Artibeus planirostris	COI	JQ601241	657
	Artibeus planirostris	COI	JQ601283	657
	Artibeus planirostris	COI	MK749479	657
	Artibeus planirostris	COI	MK749484	657
	Artibeus planirostris	COI	MK749485	657
	Artibeus planirostris	COI	MK749486	657
	Artibeus planirostris	COI	MK749487	657
	Artibeus planirostris	COI	MK749488	657
	Artibeus planirostris	COI	MK749489	657
	Artibeus planirostris	COI	MK749491	657
	Artibeus planirostris	COI	MW327555	578
	Artibeus planirostris	COI	MW327557	578
	Artibeus planirostris	COI	MW327558	578
	Artibeus planirostris	COI	MW327559	578
	Artibeus planirostris	COI	MW327560	578
	Artibeus planirostris	COI	MW327563	578
	Artibeus planirostris	COI	MW327564	578
	Artibeus planirostris	COI	MW327565	578
	Artibeus planirostris	COI	MW327566	578
	Artibeus planirostris	COI	MW327567	578
	Artibeus planirostris	COI	MW327569	578
	Artibeus planirostris	COI	MW327570	578
	Artibeus planirostris	COI	MW327571	578
	Artibeus planirostris	COI	MW327572	578
	Artibeus planirostris	COI	MW327574	578
	Artibeus planirostris	COI	MW327575	578
	Artibeus planirostris	COI	MW327576	578
	Artibeus planirostris	COI	MW327577	578
	Artibeus planirostris	COI	MW327578	578
	Artibeus planirostris	COI	MW327579	578
	Artibeus planirostris	COI	MW327580	578
	Artibeus planirostris	COI	MW327581	578
	Artibeus planirostris	COI	MW327582	578
	Artibeus planirostris	COI	MW327583	578
	Artibeus planirostris	COI	MW327584	578
	Artibeus planirostris	COI	OM961052	657
	Artibeus planirostris	COI	OM961141	657
	Artibeus planirostris	COI	OM961178	657
	Artibeus planirostris	COI	OM961395	657
	Artibeus planirostris	COI	OM962796	657
	Artibeus planirostris	COI	OM962966	657
	Artibeus planirostris	COI	OM962967	657
	Artibeus planirostris	COI	OM962970	657
	Artibeus sp.	COI	JF444280	657
	Artibeus sp.	COI	HQ919744	657
	Artibeus sp.	COI	HQ919769	657
	Artibeus sp.	COI	JN312367	645
	Artibeus sp.	COI	HQ919722	657
	Carollia brevicauda	CYTB	AF187017	1140
	Carollia brevicauda	CYTB	AF187018	1140
	Carollia brevicauda	CYTB	AF187019	1140
	Carollia castanea	CYTB	AF187020	1140
	Carollia castanea	CYTB	AF187021	1140
	Carollia castanea	CYTB	AF187022	1140
	Carollia subrufa	CYTB	AF187023	1140
	Carollia subrufa	CYTB	AF187024	1140
	Carollia perspicillata	CYTB	AF187025	1140
	Carollia perspicillata	CYTB	AF187026	1140
	Carollia perspicillata	CYTB	AF435174	775
	Carollia brevicauda	CYTB	AF511951	1140
	Carollia brevicauda	CYTB	AF511952	1140
	Carollia brevicauda	CYTB	AF511953	1140
	Carollia brevicauda	CYTB	AF511954	1140
	Carollia brevicauda	CYTB	AF511955	1140
	Carollia brevicauda	CYTB	AF511956	1140
	Carollia brevicauda	CYTB	AF511957	1140
	Carollia brevicauda	CYTB	AF511958	1140
	Carollia brevicauda	CYTB	AF511959	1140
	Carollia brevicauda	CYTB	AF511960	1140
	Carollia sowelli	CYTB	AF511961	1140
	Carollia sowelli	CYTB	AF511962	1140
	Carollia sowelli	CYTB	AF511965	1140
	Carollia sowelli	CYTB	AF511966	1140
	Carollia sowelli	CYTB	AF511968	1140
	Carollia sowelli	CYTB	AF511969	1140
	Carollia sowelli	CYTB	AF511970	1140
	Carollia sowelli	CYTB	AF511971	1140
	Carollia sowelli	CYTB	AF511972	1140
	Carollia sowelli	CYTB	AF511973	1140
	Carollia perspicillata	CYTB	AF511974	1140
	Carollia perspicillata	CYTB	AF511975	1140
	Carollia perspicillata	CYTB	AF511976	1140
	Carollia perspicillata	CYTB	AF511977	1140
	Carollia perspicillata	CYTB	AF511978	1140
	Carollia perspicillata	CYTB	AF511979	1140
	Carollia perspicillata	CYTB	AF511980	1140
	Carollia perspicillata	CYTB	AF511981	1140
	Carollia perspicillata	CYTB	AF511982	1140
	Carollia perspicillata	CYTB	AF511983	1140
	Carollia perspicillata	CYTB	AF511984	1140
	Carollia perspicillata	CYTB	AF511986	1140
	Carollia perspicillata	CYTB	AF511987	1140
	Carollia perspicillata	CYTB	AF511988	1140
	Carollia perspicillata	CYTB	AF511990	1140
	Carollia perspicillata	CYTB	AF511991	1140
	Carollia castanea	CYTB	AF511992	1140
	Carollia castanea	CYTB	AF511993	1140
	Carollia castanea	CYTB	AF511994	1140
	Carollia castanea	CYTB	AF511995	1140
	Carollia castanea	CYTB	AF511996	1140
	Carollia castanea	CYTB	AF511997	1140
	Carollia castanea	CYTB	AF511998	1140
	Carollia castanea	CYTB	AF511999	1140
	Carollia castanea	CYTB	AF512000	1140
	Carollia castanea	CYTB	AF512001	1140
	Carollia castanea	CYTB	AF512002	1140
	Carollia castanea	CYTB	AF512003	1140
	Carollia castanea	CYTB	AF512004	1140
	Carollia castanea	CYTB	AF512005	1140
	Carollia castanea	CYTB	AF512006	1140
	Carollia benkeithi	CYTB	DQ177280	1110
	Carollia benkeithi	CYTB	DQ177281	1110
	Carollia benkeithi	CYTB	DQ177282	1110
	Carollia castanea	CYTB	DQ888276	1079
	Carollia castanea	CYTB	DQ888277	919
	Carollia castanea	CYTB	DQ888278	1011
	Carollia brevicauda	CYTB	DQ888279	1098
	Carollia perspicillata	CYTB	DQ888280	1051
	Carollia brevicauda	CYTB	DQ888283	1045
	Carollia castanea	CYTB	DQ888286	1078
	Carollia castanea	CYTB	DQ888288	544
	Carollia castanea	CYTB	DQ888289	1043
	Carollia castanea	CYTB	DQ888292	1020
	Carollia castanea	CYTB	DQ888294	790
	Carollia perspicillata	CYTB	DQ888296	816
	Carollia castanea	CYTB	DQ888298	802
	Carollia brevicauda	CYTB	DQ888300	807
	Carollia brevicauda	CYTB	DQ888305	825
	Carollia perspicillata	CYTB	DQ888306	813
	Carollia brevicauda	CYTB	FJ154120	1140
	Carollia brevicauda	CYTB	FJ589651	1140
	Carollia brevicauda	CYTB	FJ589652	1140
	Carollia brevicauda	CYTB	FJ589653	1140
	Carollia brevicauda	CYTB	FJ589654	401
	Carollia perspicillata	CYTB	FJ589655	1140
	Carollia perspicillata	CYTB	FJ589656	1140
	Carollia perspicillata	CYTB	FJ589657	1140
	Carollia perspicillata	CYTB	FJ589658	1140
	Carollia perspicillata	CYTB	FJ589659	1140
	Carollia perspicillata	CYTB	FJ589660	1140
	Carollia perspicillata	CYTB	FJ589661	1140
	Carollia perspicillata	CYTB	FJ589662	1140
	Carollia perspicillata	CYTB	FJ589663	1140
	Carollia perspicillata	CYTB	FJ589664	1140
	Carollia perspicillata	CYTB	FJ589665	1140
	Carollia perspicillata	CYTB	FJ589666	1140
	Carollia perspicillata	CYTB	FJ589667	1140
	Carollia perspicillata	CYTB	FJ589668	1140
	Carollia perspicillata	CYTB	FJ589669	1140
	Carollia perspicillata	CYTB	FJ589670	1140
	Carollia perspicillata	CYTB	FJ589671	1140
	Carollia perspicillata	CYTB	FJ589672	1140
	Carollia perspicillata	CYTB	FJ589673	1140
	Carollia perspicillata	CYTB	FJ589675	1140
	Carollia perspicillata	CYTB	FJ589676	1140
	Carollia perspicillata	CYTB	FJ589677	1140
	Carollia perspicillata	CYTB	FJ589678	1140
	Carollia perspicillata	CYTB	FJ589679	1140
	Carollia perspicillata	CYTB	FJ589680	1140
	Carollia perspicillata	CYTB	FJ589681	1140
	Carollia perspicillata	CYTB	FJ589682	1140
	Carollia perspicillata	CYTB	FJ589683	1140
	Carollia perspicillata	CYTB	FJ589684	1140
	Carollia perspicillata	CYTB	FJ589685	1140
	Carollia perspicillata	CYTB	FJ589686	1140
	Carollia perspicillata	CYTB	FJ589687	1140
	Carollia perspicillata	CYTB	FJ589688	1140
	Carollia perspicillata	CYTB	FJ589689	1140
	Carollia perspicillata	CYTB	FJ589690	1140
	Carollia perspicillata	CYTB	FJ589691	1140
	Carollia perspicillata	CYTB	FJ589692	1140
	Carollia perspicillata	CYTB	FJ589693	1140
	Carollia perspicillata	CYTB	FJ589694	1140
	Carollia perspicillata	CYTB	FJ589695	1140
	Carollia perspicillata	CYTB	FJ589696	1140
	Carollia perspicillata	CYTB	FJ589700	1140
	Carollia perspicillata	CYTB	FJ589701	1140
	Carollia perspicillata	CYTB	FJ589702	1140
	Carollia perspicillata	CYTB	FJ589703	1140
	Carollia perspicillata	CYTB	FJ589704	1140
	Carollia perspicillata	CYTB	FJ589705	1140
	Carollia perspicillata	CYTB	FJ589706	1140
	Carollia perspicillata	CYTB	FJ589707	1140
	Carollia perspicillata	CYTB	FJ589708	1140
	Carollia perspicillata	CYTB	FJ589709	1140
	Carollia perspicillata	CYTB	FJ589710	1140
	Carollia perspicillata	CYTB	FJ589711	1140
	Carollia perspicillata	CYTB	FJ589712	1140
	Carollia perspicillata	CYTB	FJ589713	1140
	Carollia perspicillata	CYTB	FJ589714	1140
	Carollia perspicillata	CYTB	FJ589715	1140
	Carollia perspicillata	CYTB	gene	1140
	Rhinophylla pumilio	CYTB	HG003313	1140
	Carollia perspicillata	CYTB	JF442123	401
	Carollia brevicauda	CYTB	JF442129	401
	Carollia brevicauda	CYTB	JF442132	1140
	Carollia castanea	CYTB	JF442134	401
	Carollia perspicillata	CYTB	JF442140	401
	Carollia castanea	CYTB	JF442157	706
	Carollia perspicillata	CYTB	JF442187	401
	Carollia perspicillata	CYTB	JX444090	1140
	Carollia perspicillata	CYTB	JX444091	1140
	Carollia perspicillata	CYTB	KC011594	1140
	Carollia manu	CYTB	KC753898	1140
	Carollia benkeithi	CYTB	KF019702	1140
	Carollia benkeithi	CYTB	KF019703	1140
	Carollia benkeithi	CYTB	KF019704	1140
	Carollia benkeithi	CYTB	KF019705	489
	Carollia benkeithi	CYTB	KF019706	1140
	Carollia benkeithi	CYTB	KF019707	1140
	Carollia brevicauda	CYTB	KF019708	1140
	Carollia brevicauda	CYTB	KF019709	1140
	Carollia brevicauda	CYTB	KF019710	1140
	Carollia brevicauda	CYTB	KF019711	1140
	Carollia brevicauda	CYTB	KF019712	1140
	Carollia brevicauda	CYTB	KF019713	1140
	Carollia brevicauda	CYTB	KF019714	1140
	Carollia brevicauda	CYTB	KF019715	1140
	Carollia brevicauda	CYTB	KF019716	1140
	Carollia brevicauda	CYTB	KF019717	1140
	Carollia brevicauda	CYTB	KF019718	1140
	Carollia perspicillata	CYTB	KF019720	1140
	Carollia perspicillata	CYTB	KF019721	1076
[truncated: 2,462 more rows]

## Sheet: Akodon
	Cytb				COI
	scientific name	Genbank Accession	Length (bp)		scientific name	Genbank Accession	Length (bp)
	Abrothrix olivaceus	KC841338	1140		Akodon albiventer	MW009981	655
	Akodon aerosus	KC841346	1140		Akodon albiventer	MW009982	655
	Akodon aerosus	KC841410	1038		Akodon azarae	GU938911	647
	Akodon aerosus	KT965001	1106		Akodon azarae	GU938989	649
	Akodon affinis	AY196164	1140		Akodon azarae	MW009925	655
	Akodon albiventer	KC841341	1140		Akodon boliviensis	MW009941	655
	Akodon albiventer	KC841342	1140		Akodon boliviensis	MW009942	655
	Akodon albiventer	KC841357	1140		Akodon boliviensis	MW009943	655
	Akodon azarae	AY702963	801		Akodon boliviensis	MW009944	655
	Akodon azarae	AY702964	1140		Akodon boliviensis	MW009947	655
	Akodon azarae	KC841351	1140		Akodon budini	MW009976	655
	Akodon azarae	KC841352	1140		Akodon budini	MW009977	655
	Akodon azarae	KC841409	1065		Akodon budini	MW009978	655
	Akodon azarae	DQ444328	1140		Akodon budini	MW009979	655
	Akodon azarae	EF622507	1140		Akodon budini	MW009980	638
	Akodon baliolus	KC841366	1126		Akodon caenosus	MW009932	655
	Akodon baliolus	KC841368	1097		Akodon caenosus	MW009933	655
	Akodon boliviensis	GU189317	800		Akodon caenosus	MW009935	655
	Akodon boliviensis	GU189318	801		Akodon caenosus	MW009937	655
	Akodon boliviensis	GU189319	801		Akodon caenosus	MW009938	655
	Akodon boliviensis	GU189320	800		Akodon caenosus	MW009939	655
	Akodon boliviensis	GU189321	801		Akodon caenosus	MW009940	655
	Akodon boliviensis	KC841361	1140		Akodon cursor	KF815396	656
	Akodon boliviensis	KY753934	1140		Akodon dolores	MZ050245	656
	Akodon boliviensis	MH177966	801		Akodon dolores	MZ050260	656
	Akodon budini	EF166037	775		Akodon fumeus	MW009926	655
	Akodon caenosus	GU189322	801		Akodon mollis	MF806209	656
	Akodon caenosus	GU189324	801		Akodon mollis	MF806210	656
	Akodon caenosus	GU189325	799		Akodon mollis	MF806211	656
	Akodon caenosus	GU189327	801		Akodon mollis	MF806212	656
	Akodon caenosus	KC841333	1140		Akodon mollis	MF806213	656
	Akodon caenosus	KC841344	1067		Akodon mollis	MF806214	656
	Akodon caenosus	KC841356	1080		Akodon mollis	MF806216	656
	Akodon caenosus	KC841359	1140		Akodon mollis	MF806226	656
	Akodon caenosus	KC841387	1140		Akodon mollis	MF806233	656
	Akodon caenosus	KC841391	1140		Akodon mollis	MF806234	656
	Akodon caenosus	KC841406	1140		Akodon mollis	MF806242	656
	Akodon caenosus	KC841407	1085		Akodon mollis	MF806252	656
	Akodon cursor	EF206814	1140		Akodon mollis	MF806253	656
	Akodon cursor	KC841339	1140		Akodon mollis	MF806254	649
	Akodon cursor	KF815391	861		Akodon mollis	MF806255	656
	Akodon dayi	EU260477	1140		Akodon mollis	MF806256	656
	Akodon dolores	EU260472	1140		Akodon mollis	MF806258	656
	Akodon dolores	EU260473	1140		Akodon montensis	GU938873	647
	Akodon dolores	EU260474	1140		Akodon montensis	GU938874	647
	Akodon dolores	EU260475	1140		Akodon montensis	GU938875	647
	Akodon dolores	EU260476	1140		Akodon montensis	GU938913	647
	Akodon dolores	KC841390	1140		Akodon montensis	GU938919	647
	Akodon fumeus	GU189328	799		Akodon montensis	GU938920	647
	Akodon fumeus	GU189329	800		Akodon montensis	GU938923	647
	Akodon fumeus	KC841332	1140		Akodon montensis	GU938926	647
	Akodon fumeus	KC841343	1140		Akodon montensis	GU938927	647
	Akodon fumeus	KC841354	1140		Akodon montensis	GU938928	647
	Akodon fumeus	KC841360	1140		Akodon montensis	GU938929	647
	Akodon fumeus	KC841369	1140		Akodon montensis	GU938930	647
	Akodon fumeus	KC841371	1140		Akodon montensis	GU938931	647
	Akodon fumeus	KC841375	1140		Akodon montensis	GU938932	647
	Akodon fumeus	KC841402	1087		Akodon montensis	GU938933	646
	Akodon fumeus	KC841403	1102		Akodon montensis	GU938934	647
	Akodon glaucinus	EU260483	1140		Akodon montensis	KF769456	656
	Akodon glaucinus	EU260484	1140		Akodon montensis	KJ013083	656
	Akodon glaucinus	KC841384	1077		Akodon montensis	KJ013086	656
	Akodon iniscatus	HM167761	801		Akodon oenos	MZ050354	656
	Akodon iniscatus	HM167762	791		Akodon paranaensis	GU938991	649
	Akodon iniscatus	HM167768	801		Akodon paranaensis	GU938992	648
	Akodon iniscatus	HM167769	801		Akodon paranaensis	GU938993	649
	Akodon iniscatus	HM167770	801		Akodon polopi	MW009930	655
	Akodon iniscatus	KC841337	1140		Akodon polopi	MW009931	655
	Akodon josemariarguedasi	MK419959	786		Akodon polopi	MZ050240	656
	Akodon josemariarguedasi	MK419965	801		Akodon polopi	MZ050246	656
	Akodon josemariarguedasi	MK419966	801		Akodon polopi	MZ050253	656
	Akodon josemariarguedasi	MK419970	789		Akodon polopi	MZ050301	656
	Akodon josemariarguedasi	MK419971	795		Akodon polopi	MZ050310	656
	Akodon josemariarguedasi	MK419972	564		Akodon polopi	MZ050356	656
	Akodon josemariarguedasi	MK419973	789		Akodon polopi	MZ050357	656
	Akodon kofordi	KC841365	1140		Akodon polopi	MZ050367	656
	Akodon kofordi	KY753935	1050		Akodon serrensis	KF815397	656
	Akodon kotosh	MK419960	801		Akodon simulator	MW009983	646
	Akodon latebricola	MT240524	801		Akodon simulator	MW009984	655
	Akodon lutescens	KY753936	1140		Akodon simulator	MW009985	655
	Akodon lutescens	KC841330	1140		Akodon simulator	MW009986	655
	Akodon lutescens	KC841331	1140		Akodon simulator	MW009987	654
	Akodon lutescens	KC841353	1140		Akodon simulator	MW009988	655
	Akodon lutescens	KC841358	1140		Akodon simulator	MW009989	655
	Akodon lutescens	KC841370	1140		Akodon simulator	MW009991	655
	Akodon mollis	KC841350	1086		Akodon simulator	MW009992	648
	Akodon mollis	KC841372	1126		Akodon simulator	MW009993	655
	Akodon mollis	KC841373	1140		Akodon simulator	MW009994	655
	Akodon mollis	KC841376	1067		Akodon simulator	MW009996	655
	Akodon mollis	KC841334	1140		Akodon simulator	MW009997	655
	Akodon montensis	AY195864	1140		Akodon simulator	MW010001	655
	Akodon montensis	EF206813	1140		Akodon simulator	MW010004	655
	Akodon montensis	EU251018	1140		Akodon simulator	MZ050370	632
	Akodon montensis	EU251020	1138		Akodon sp. 1 JJM 2020	MW009948	652
	Akodon montensis	EU251021	748		Akodon spegazzinii	MW009949	655
	Akodon montensis	EU251022	1077		Akodon spegazzinii	MW009950	644
	Akodon montensis	EU251023	597		Akodon spegazzinii	MW009951	655
	Akodon montensis	KC841363	1140		Akodon spegazzinii	MW009952	655
	Akodon montensis	KC841364	1140		Akodon spegazzinii	MW009954	655
	Akodon montensis	KF207863	801		Akodon spegazzinii	MW009955	653
	Akodon montensis	KF207864	801		Akodon spegazzinii	MW009956	655
	Akodon montensis	MT861172	801		Akodon spegazzinii	MW009958	655
	Akodon montensis	MT861178	801		Akodon spegazzinii	MW009959	655
	Akodon montensis	025746	1140		Akodon spegazzinii	MW009963	655
	Akodon orophilus	KC841335	1140		Akodon spegazzinii	MW009965	655
	Akodon orophilus	KC841336	1140		Akodon spegazzinii	MW009966	655
	Akodon orophilus	KY753937	427		Akodon spegazzinii	MW009967	655
	Akodon orophilus	MK419968	801		Akodon spegazzinii	MW009968	655
	Akodon orophilus	MK419969	801		Akodon spegazzinii	MW009970	655
	Akodon paranaensis	AY195866	1140		Akodon spegazzinii	MZ050235	656
	Akodon paranaensis	EF621302	801		Akodon spegazzinii	MZ050238	656
	Akodon paranaensis	EF621303	801		Akodon spegazzinii	MZ050242	656
	Akodon paranaensis	EF621304	801		Akodon spegazzinii	MZ050243	656
	Akodon paranaensis	EF622506	1140		Akodon spegazzinii	MZ050254	656
	Akodon paranaensis	EU251017	1140		Akodon spegazzinii	MZ050256	656
	Akodon paranaensis	EU251019	1020		Akodon spegazzinii	MZ050263	656
	Akodon paranaensis	EU579471	1140		Akodon spegazzinii	MZ050274	656
	Akodon philipmyersi	AY702965	1140		Akodon spegazzinii	MZ050280	656
	Akodon philipmyersi	AY702966	1140		Akodon spegazzinii	MZ050285	656
	Akodon polopi	GU189330	801		Akodon spegazzinii	MZ050288	656
	Akodon polopi	GU189331	801		Akodon spegazzinii	MZ050289	656
	Akodon reigi	AY195865	1140		Akodon spegazzinii	MZ050309	656
	Akodon reigi	EF621305	801		Akodon spegazzinii	MZ050316	656
	Akodon serrensis	EF622508	1140		Akodon spegazzinii	MZ050321	656
	Akodon simulator	EU260480	1140		Akodon spegazzinii	MZ050322	656
	Akodon simulator	EU260481	1140		Akodon spegazzinii	MZ050333	656
	Akodon simulator	EU260482	1140		Akodon spegazzinii	MZ050338	656
	Akodon simulator	KC841383	1082		Akodon spegazzinii	MZ050363	656
	Akodon simulator	KC841405	1112		Akodon toba	MW009971	655
	Akodon simulator	KC841408	1051		Akodon toba	MW009972	655
	Akodon sp.	AY702968	801		Akodon toba	MW009974	655
	Akodon spegazzinii	AY196165	1140		Akodon toba	MW009975	655
	Akodon spegazzinii	GU189332	785		Akodon urichi	JF491457	656
	Akodon spegazzinii	GU189333	801		Brucepattersonius soricinus	KF815404	656
	Akodon spegazzinii	GU189334	801
	Akodon spegazzinii	GU189335	801
	Akodon spegazzinii	GU189336	801
	Akodon spegazzinii	GU189339	801
	Akodon spegazzinii	GU189340	801
	Akodon spegazzinii	GU189341	801
	Akodon spegazzinii	GU189342	801
	Akodon spegazzinii	GU189343	620
	Akodon spegazzinii	GU189344	801
	Akodon spegazzinii	GU189345	780
	Akodon spegazzinii	GU189346	801
	Akodon spegazzinii	GU189347	801
	Akodon spegazzinii	GU189348	801
	Akodon spegazzinii	HQ236017	801
	Akodon spegazzinii	KC841378	1094
	Akodon spegazzinii	KC841379	1140
	Akodon spegazzinii	KC841380	1140
	Akodon spegazzinii	KC841381	1140
	Akodon spegazzinii	KC841382	1140
	Akodon spegazzinii	KC841386	1140
	Akodon spegazzinii	KC841392	1140
	Akodon spegazzinii	KC841393	1140
	Akodon spegazzinii	KC841394	1140
	Akodon spegazzinii	KC841395	1140
	Akodon spegazzinii	KC841397	1140
	Akodon spegazzinii	KC841398	1140
	Akodon spegazzinii	KC841399	1140
	Akodon spegazzinii	KC841401	1085
	Akodon spegazzinii	KY753938	426
	Akodon spegazzinii	MK560499	801
	Akodon spegazzinii	MK560500	801
	Akodon spegazzinii	MK560503	801
	Akodon spegazzinii	MK560504	801
	Akodon spegazzinii	MK560507	801
	Akodon spegazzinii	MK560516	801
	Akodon subfuscus	KC841377	1140
	Akodon sylvanus	DQ683180	788
	Akodon sylvanus	DQ683181	790
	Akodon sylvanus	GU189349	720
	Akodon sylvanus	KC841404	1079
	Akodon tartareus	EU260486	1140
	Akodon tartareus	EU260487	1140
	Akodon toba	KC841374	1140
	Akodon torques	KC841345	1072
	Akodon torques	KC841347	1140
	Akodon torques	KC841348	1140
	Akodon torques	MK419963	801
	Akodon torques	MK419964	801
	Akodon varius	EU260478	1140
	Akodon varius	EU260479	1140
	Andinomys edax	KC841355	1140
	Brucepattersonius soricinus	KF815439	1137
	Necromys lactens	EU260470	1140
	Necromys lasiurus	EF622509	1140
	Necromys obscurus	DQ683183	801
	Necromys sp.	EU260471	1140
	Oligoryzomys destructor	KC841388	1140
	Oligoryzomys destructor	KC841389	1140
	Oligoryzomys nigripes	EU251025	727
	Oligoryzomys nigripes	EU251026	718
	Oligoryzomys nigripes	EU251027	656
	Oligoryzomys nigripes	EU251028	702
	Oligoryzomys nigripes	EU251029	506
	Oligoryzomys nigripes	EU251030	617
	Oligoryzomys nigripes	EU251031	602
	Oligoryzomys nigripes	EU251032	653
	Oligoryzomys nigripes	EU251033	643
	Oligoryzomys nigripes	EU251034	611
	Oxymycterus nasutus	EF661854	1140
	Sooretamys angouya	EU251024	688
	Thaptomys nigrita	AF108666	1140
	Thaptomys nigrita	EF206815	1140

## Sheet: Artibeus
	Cytb				COI
	scientific name	Genbank Accession	Length (bp)		scientific name	Genbank Accession	Length (bp)
	Artibeus amplus	EU160947	1140		Artibeus amplus	EF080025	657
	Artibeus amplus	EU160946	1140		Artibeus amplus	EF080026	657
	Artibeus amplus	AY642924	1140		Artibeus amplus	EF080029	654
	Artibeus amplus	AY642923	1140		Artibeus amplus	EU160973	501
	Artibeus aztecus	U66510	1140		Artibeus amplus	EU160974	501
	Artibeus aztecus	FJ376713	1140		Artibeus amplus	HQ545659	657
	Artibeus aztecus	FJ376712	1140		Artibeus amplus	JF447883	657
	Artibeus cf. Jamaicensis	DQ985488	1140		Artibeus amplus	JF447885	657
	Artibeus cf. Jamaicensis	DQ903818	761		Artibeus amplus	JF447886	657
	Artibeus cf. Jamaicensis	DQ985490	761		Artibeus amplus	JF447888	657
	Artibeus cf. Jamaicensis	DQ985489	761		Artibeus amplus	JF447889	657
	Artibeus cf. Jamaicensis	DQ985487	739		Artibeus amplus	JF447892	657
	Artibeus cf. Jamaicensis	DQ985486	761		Artibeus amplus	JF447894	657
	Artibeus concolor	U66519	1140		Artibeus amplus	JF447896	657
	Artibeus concolor	U66518	1140		Artibeus amplus	JF447900	657
	Artibeus concolor	EU160952	1140		Artibeus amplus	JF447902	657
	Artibeus concolor	EU160951	1140		Artibeus amplus	JF447906	657
	Artibeus concolor	EU160950	1140		Artibeus amplus	JF447908	657
	Artibeus concolor	EU160949	1140		Artibeus concolor	EF080060	655
	Artibeus concolor	EU160948	1140		Artibeus concolor	EF080061	655
	Artibeus fimbriatus	U66498	1140		Artibeus concolor	EF080063	655
	Artibeus fimbriatus	KT626651	1140		Artibeus concolor	EF080065	657
	Artibeus fimbriatus	JX444076	739		Artibeus concolor	EF080066	655
	Artibeus fimbriatus	JX444075	1140		Artibeus concolor	EU096558	657
	Artibeus fimbriatus	JX444074	1140		Artibeus concolor	EU160984	501
	Artibeus fimbriatus	EU160723	1140		Artibeus concolor	HQ545553	657
	Artibeus fimbriatus	EU160722	1140		Artibeus concolor	HQ545627	657
	Artibeus fimbriatus	EU160721	761		Artibeus concolor	HQ919665	657
	Artibeus fimbriatus	EU160720	1140		Artibeus concolor	HQ919720	657
	Artibeus fimbriatus	EU160719	1140		Artibeus concolor	JF447485	655
	Artibeus fimbriatus	EU160718	1140		Artibeus concolor	JF447486	655
	Artibeus fimbriatus	EU160717	1140		Artibeus concolor	JF452350	655
	Artibeus fimbriatus	EU160716	1140		Artibeus concolor	JF452351	657
	Artibeus fimbriatus	EU160715	1140		Artibeus concolor	JF452352	657
	Artibeus fimbriatus	EU160714	1140		Artibeus concolor	JF452353	657
	Artibeus fimbriatus	EU160713	1140		Artibeus concolor	JF452354	657
	Artibeus fimbriatus	EU160712	1140		Artibeus concolor	JF452355	657
	Artibeus fimbriatus	EU160711	1140		Artibeus concolor	JF452356	657
	Artibeus fimbriatus	EU160710	1140		Artibeus concolor	JF452357	657
	Artibeus fimbriatus	EU160709	1140		Artibeus concolor	JF452358	657
	Artibeus fimbriatus	EU160708	1140		Artibeus concolor	JF452359	657
	Artibeus fimbriatus	EU160707	1140		Artibeus concolor	JF452360	657
	Artibeus fimbriatus	EU160706	1140		Artibeus concolor	JF452361	657
	Artibeus fimbriatus	EU160705	1140		Artibeus concolor	JF452362	657
	Artibeus fimbriatus	EU160704	1140		Artibeus concolor	JF452363	657
	Artibeus fimbriatus	EU160702	1140		Artibeus concolor	JF452364	657
	Artibeus fimbriatus	EU160701	1140		Artibeus concolor	JF452365	647
	Artibeus fimbriatus	EU160700	1140		Artibeus concolor	JF452366	648
	Artibeus fimbriatus	EU160699	1140		Artibeus concolor	JF452367	657
	Artibeus fimbriatus	EU160698	1140		Artibeus concolor	JF452368	657
	Artibeus fimbriatus	EU160697	1140		Artibeus concolor	JF452369	657
	Artibeus fimbriatus	EU160696	1140		Artibeus concolor	JF452370	657
	Artibeus fimbriatus	EU160695	1140		Artibeus concolor	JF452373	657
	Artibeus fimbriatus	EU160694	1140		Artibeus concolor	JF452374	657
	Artibeus fimbriatus	EU160692	1140		Artibeus concolor	JF452375	657
	Artibeus fimbriatus	EU160691	1140		Artibeus concolor	JF452377	657
	Artibeus fimbriatus	EU160690	1140		Artibeus concolor	JF452379	657
	Artibeus fimbriatus	EU160689	1140		Artibeus concolor	JF452380	657
	Artibeus fimbriatus	EU160688	1140		Artibeus concolor	JF452381	657
	Artibeus fimbriatus	DQ985500	1140		Artibeus concolor	JF452382	657
	Artibeus fimbriatus	DQ985479	1140		Artibeus concolor	JF452383	657
	Artibeus fimbriatus	DQ985478	1140		Artibeus concolor	JF452384	657
	Artibeus fimbriatus	DQ985477	1140		Artibeus concolor	JF452385	657
	Artibeus fimbriatus	DQ985476	1140		Artibeus concolor	JF452386	657
	Artibeus fimbriatus	DQ903820	1140		Artibeus concolor	JF452387	657
	Artibeus fimbriatus	DQ869391	1140		Artibeus concolor	JF452389	657
	Artibeus fimbriatus	DQ869390	1140		Artibeus concolor	JF452390	650
	Artibeus fraterculus	U66499	1140		Artibeus concolor	JF452391	657
	Artibeus fraterculus	GQ861588	1140		Artibeus concolor	JF452392	657
	Artibeus fraterculus	GQ861587	1140		Artibeus concolor	JF452394	657
	Artibeus fraterculus	GQ861586	1140		Artibeus concolor	JF452395	657
	Artibeus fraterculus	EU160955	1140		Artibeus concolor	JF452397	657
	Artibeus fraterculus	EU160954	1140		Artibeus concolor	JF452398	657
	Artibeus fraterculus	EU160953	1140		Artibeus concolor	JF452400	657
	Artibeus fraterculus	DQ869389	1140		Artibeus concolor	JF452401	657
	Artibeus fraterculus	DQ869388	1140		Artibeus concolor	JF452402	648
	Artibeus hartii	U66517	1140		Artibeus concolor	JF452404	657
	Artibeus hartii	ON321892	1140		Artibeus concolor	JF452405	657
	Artibeus hartii	065681	1140		Artibeus concolor	JF452406	657
	Artibeus hartii	EU160972	1140		Artibeus concolor	JF452407	657
	Artibeus hartii	EU160971	1140		Artibeus concolor	JF452408	657
	Artibeus hirsutus	U66500	1140		Artibeus concolor	JF452410	657
	Artibeus hirsutus	AY144341	1140		Artibeus concolor	JF452411	657
	Artibeus inopinatus	U66501	1140		Artibeus concolor	JF452413	657
	Artibeus intermedius	U66502	1140		Artibeus concolor	JF452415	657
	Artibeus intermedius	HQ702544	1140		Artibeus concolor	JF452416	657
	Artibeus intermedius	HQ702543	1140		Artibeus concolor	JF452417	657
	Artibeus intermedius	HQ702542	1140		Artibeus concolor	JF452418	657
	Artibeus intermedius	HQ702541	1140		Artibeus concolor	JF452419	657
	Artibeus intermedius	HQ702540	1140		Artibeus concolor	KU295495	579
	Artibeus intermedius	HQ702539	713		Artibeus fimbriatus	EU160987	501
	Artibeus intermedius	AY144339	1140		Artibeus fimbriatus	EU160992	501
	Artibeus intermedius	AY144338	1140		Artibeus fimbriatus	JF446310	657
	Artibeus jamaicensis	DQ869484	1140		Artibeus fimbriatus	JF446311	657
	Artibeus jamaicensis	DQ869483	1140		Artibeus fimbriatus	JF446312	654
	Artibeus jamaicensis	AY144347	1140		Artibeus fimbriatus	OM920069	657
	Artibeus jamaicensis	AY144343	1140		Artibeus fimbriatus	OM920071	657
	Artibeus jamaicensis	AY144340	1140		Artibeus fimbriatus	OM920072	657
	Artibeus jamaicensis	U66504	1140		Artibeus fimbriatus	OM921006	657
	Artibeus jamaicensis	U66503	1140		Artibeus fimbriatus	OM921395	657
	Artibeus jamaicensis	AY382782	1140		Artibeus fraterculus	EU160993	501
	Artibeus jamaicensis	AY144346	1140		Artibeus fraterculus	EU160994	501
	Artibeus jamaicensis	AY144345	1140		Artibeus hartii	EU161064	501
	Artibeus jamaicensis	AY144344	1140		Artibeus hartii	JF447407	614
	Artibeus jamaicensis	AY144342	1140		Artibeus hartii	JF447408	657
	Artibeus jamaicensis	DQ869454	1140		Artibeus hartii	JF447409	657
	Artibeus jamaicensis	DQ869453	1140		Artibeus hartii	065681	657
	Artibeus jamaicensis	DQ869452	1140		Artibeus hartii	ON321892	657
	Artibeus jamaicensis	DQ869451	1070		Artibeus intermedius	JF446451	657
	Artibeus jamaicensis	AY382785	1140		Artibeus intermedius	JF446452	657
	Artibeus jamaicensis	AY382784	1140		Artibeus intermedius	JF446453	657
	Artibeus jamaicensis	AY382783	1140		Artibeus intermedius	JF446617	657
	Artibeus jamaicensis	DQ869456	1140		Artibeus intermedius	JF446619	657
	Artibeus jamaicensis	DQ869455	1140		Artibeus intermedius	JF446940	657
	Artibeus jamaicensis	AY382786	1140		Artibeus intermedius	JF446941	657
	Artibeus jamaicensis	DQ869474	1140		Artibeus intermedius	JF446942	558
	Artibeus jamaicensis	JX502735	1140		Artibeus intermedius	JF446948	657
	Artibeus jamaicensis	JX502734	1140		Artibeus intermedius	JF446950	657
	Artibeus jamaicensis	JX502733	1140		Artibeus intermedius	JF446951	657
	Artibeus jamaicensis	JX502732	1140		Artibeus intermedius	JF446952	657
	Artibeus jamaicensis	JX502731	1140		Artibeus intermedius	JF446953	657
	Artibeus jamaicensis	JX502730	1140		Artibeus intermedius	JF446956	657
	Artibeus jamaicensis	JX502729	1140		Artibeus intermedius	JF446958	657
	Artibeus jamaicensis	JX502728	1140		Artibeus intermedius	JF446959	657
	Artibeus jamaicensis	JX502727	1095		Artibeus intermedius	JF446963	657
	Artibeus jamaicensis	JX502726	1140		Artibeus intermedius	JF446964	657
	Artibeus jamaicensis	JX502725	1097		Artibeus intermedius	JF446965	657
	Artibeus jamaicensis	JX502724	1140		Artibeus intermedius	JF446967	657
	Artibeus jamaicensis	JX502723	1140		Artibeus intermedius	JF446968	655
	Artibeus jamaicensis	JX502722	1140		Artibeus intermedius	JF446969	657
	Artibeus jamaicensis	JX502721	1140		Artibeus intermedius	JF446970	657
	Artibeus jamaicensis	JX502720	1076		Artibeus intermedius	JF446971	657
	Artibeus jamaicensis	JX502719	430		Artibeus intermedius	JF446972	657
	Artibeus jamaicensis	JX502718	430		Artibeus intermedius	JF446973	657
	Artibeus jamaicensis	JX502717	430		Artibeus intermedius	JF446976	657
	Artibeus jamaicensis	JX502716	373		Artibeus intermedius	JF446978	657
	Artibeus jamaicensis	JX502715	347		Artibeus intermedius	JF446983	657
	Artibeus jamaicensis	JX502714	428		Artibeus intermedius	JF446987	657
	Artibeus jamaicensis	JX502713	1140		Artibeus intermedius	JF446988	657
	Artibeus jamaicensis	JX502712	1140		Artibeus intermedius	JF446989	657
	Artibeus jamaicensis	JX502709	1140		Artibeus intermedius	JF446991	657
	Artibeus jamaicensis	JX502708	1140		Artibeus intermedius	JF447010	657
	Artibeus jamaicensis	JX502707	612		Artibeus intermedius	JF447012	657
	Artibeus jamaicensis	JX502706	612		Artibeus intermedius	JF447014	657
	Artibeus jamaicensis	JX502705	612		Artibeus intermedius	JF447018	657
	Artibeus jamaicensis	JX502704	612		Artibeus intermedius	JF447020	657
	Artibeus jamaicensis	JX502703	612		Artibeus intermedius	JF447021	657
	Artibeus jamaicensis	JX502702	612		Artibeus intermedius	JF447023	657
	Artibeus jamaicensis	JX502701	612		Artibeus intermedius	JF447024	657
	Artibeus jamaicensis	JX502700	612		Artibeus intermedius	JF447025	657
	Artibeus jamaicensis	JX502699	612		Artibeus intermedius	JF447026	657
	Artibeus jamaicensis	JX502698	612		Artibeus intermedius	JF447028	657
	Artibeus jamaicensis	JX502697	612		Artibeus intermedius	JF447029	596
	Artibeus jamaicensis	JX502696	612		Artibeus intermedius	JF447032	610
	Artibeus jamaicensis	JX502695	612		Artibeus intermedius	JF447034	657
	Artibeus jamaicensis	JX502694	612		Artibeus intermedius	JF447940	657
	Artibeus jamaicensis	JX502693	612		Artibeus intermedius	JF447941	657
	Artibeus jamaicensis	JX502692	612		Artibeus intermedius	JF447943	657
	Artibeus jamaicensis	JX502691	612		Artibeus jamaicensis	AF061340	657
	Artibeus jamaicensis	JX502690	612		Artibeus jamaicensis	HQ625001	410
	Artibeus jamaicensis	JX502689	612		Artibeus jamaicensis	JF446454	657
	Artibeus jamaicensis	JX502688	612		Artibeus jamaicensis	JF446455	657
	Artibeus jamaicensis	JX502687	612		Artibeus jamaicensis	JF446456	656
	Artibeus jamaicensis	JX502686	612		Artibeus jamaicensis	JF446458	657
	Artibeus jamaicensis	JX502685	612		Artibeus jamaicensis	JF446460	657
	Artibeus jamaicensis	JX502684	612		Artibeus jamaicensis	JF446569	638
	Artibeus jamaicensis	JX502683	612		Artibeus jamaicensis	JF446570	657
	Artibeus jamaicensis	JX502682	612		Artibeus jamaicensis	JF446571	657
	Artibeus jamaicensis	JX502681	612		Artibeus jamaicensis	JF446625	657
	Artibeus jamaicensis	JX502680	612		Artibeus jamaicensis	JF446626	657
	Artibeus jamaicensis	JX502679	612		Artibeus jamaicensis	JF446629	657
	Artibeus jamaicensis	JX502678	612		Artibeus jamaicensis	JF446635	657
	Artibeus jamaicensis	DQ869515	612		Artibeus jamaicensis	JF446637	657
	Artibeus jamaicensis	DQ869508	612		Artibeus jamaicensis	JF446639	657
	Artibeus jamaicensis	DQ869495	612		Artibeus jamaicensis	JF446640	657
	Artibeus jamaicensis	DQ869479	612		Artibeus jamaicensis	JF446646	657
	Artibeus jamaicensis	GQ861665	612		Artibeus jamaicensis	JF446647	657
	Artibeus jamaicensis	GQ861660	612		Artibeus jamaicensis	JF447042	638
	Artibeus jamaicensis	GQ861659	612		Artibeus jamaicensis	JF447049	657
	Artibeus jamaicensis	GQ861594	612		Artibeus jamaicensis	JF447050	647
	Artibeus jamaicensis	GQ861593	612		Artibeus jamaicensis	JF447054	657
	Artibeus jamaicensis	GQ861592	612		Artibeus jamaicensis	JF447057	657
	Artibeus jamaicensis	GQ861591	612		Artibeus jamaicensis	JF447058	657
	Artibeus jamaicensis	AY572364	612		Artibeus jamaicensis	JF447061	647
	Artibeus jamaicensis	AY572363	612		Artibeus jamaicensis	JF447062	657
	Artibeus jamaicensis	AY572362	612		Artibeus jamaicensis	JF447063	657
	Artibeus jamaicensis	AY572361	612		Artibeus jamaicensis	JF447064	657
	Artibeus jamaicensis	AY572359	612		Artibeus jamaicensis	JF447065	657
	Artibeus jamaicensis	AY572358	612		Artibeus jamaicensis	JF447066	657
	Artibeus jamaicensis	AY572357	612		Artibeus jamaicensis	JF447068	657
	Artibeus jamaicensis	AY572356	612		Artibeus jamaicensis	JF447069	657
	Artibeus jamaicensis	AY572355	612		Artibeus jamaicensis	JF447071	657
	Artibeus jamaicensis	AY572354	612		Artibeus jamaicensis	JF447072	657
	Artibeus jamaicensis	AY572353	612		Artibeus jamaicensis	JF447341	657
	Artibeus jamaicensis	AY572352	612		Artibeus jamaicensis	JF447344	657
	Artibeus jamaicensis	AY572350	612		Artibeus jamaicensis	JF447346	657
	Artibeus jamaicensis	AY572349	612		Artibeus jamaicensis	JF447348	657
	Artibeus jamaicensis	AY572348	612		Artibeus jamaicensis	JF447349	657
	Artibeus jamaicensis	AY572347	1140		Artibeus jamaicensis	JF447350	657
	Artibeus jamaicensis	AY572346	1140		Artibeus jamaicensis	JF447945	655
	Artibeus jamaicensis	AY572345	1140		Artibeus jamaicensis	JF459373	657
	Artibeus jamaicensis	AY572344	1140		Artibeus jamaicensis	JF459374	657
	Artibeus jamaicensis	AY572343	1140		Artibeus jamaicensis	JF459375	657
	Artibeus jamaicensis	AY572342	1140		Artibeus jamaicensis	JF459376	657
	Artibeus jamaicensis	AY572341	1140		Artibeus jamaicensis	JF498911	657
	Artibeus jamaicensis	AY572339	1140		Artibeus jamaicensis	JF498912	657
	Artibeus jamaicensis	AY572338	1140		Artibeus jamaicensis	KX354999	657
	Artibeus jamaicensis	DQ869450	1140		Artibeus jamaicensis	KX355005	657
	Artibeus jamaicensis	DQ869449	1140		Artibeus jamaicensis	KX755889	201
	Artibeus jamaicensis	DQ869448	1140		Artibeus jamaicensis	MG191787	549
	Artibeus jamaicensis	DQ869447	1140		Artibeus jamaicensis	MG191791	644
	Artibeus jamaicensis	DQ869446	1140		Artibeus jamaicensis	MG191796	636
	Artibeus jamaicensis	DQ869445	1140		Artibeus jamaicensis	MG191802	641
	Artibeus jamaicensis	DQ869444	1140		Artibeus jamaicensis	MG191832	623
	Artibeus jamaicensis	DQ869443	1140		Artibeus jamaicensis	MG191833	638
	Artibeus jamaicensis	DQ869442	1140		Artibeus jamaicensis	MG191834	652
	Artibeus jamaicensis	DQ869441	1140		Artibeus jamaicensis	MG191858	552
	Artibeus jamaicensis	DQ869440	1140		Artibeus jamaicensis	MG191860	482
	Artibeus jamaicensis	DQ869421	1140		Artibeus jamaicensis	MG191886	618
	Artibeus jamaicensis	DQ869420	1140		Artibeus jamaicensis	002009	657
	Artibeus jamaicensis	DQ869419	1140		Artibeus jamaicensis	ON357726	657
	Artibeus lituratus	U66505	1140		Artibeus lituratus	EF080084	657
	Artibeus lituratus	KP134572	739		Artibeus lituratus	EF080086	657
	Artibeus lituratus	JX444082	1140		Artibeus lituratus	EF080092	657
	Artibeus lituratus	JX444081	1140		Artibeus lituratus	EF080095	657
	Artibeus lituratus	JX444080	1140		Artibeus lituratus	EF080097	657
	Artibeus lituratus	JX444077	1140		Artibeus lituratus	EF080098	655
	Artibeus lituratus	HQ702538	1140		Artibeus lituratus	EF080099	638
	Artibeus lituratus	HQ702537	1140		Artibeus lituratus	EF080102	655
	Artibeus lituratus	HQ702536	761		Artibeus lituratus	EF080103	657
	Artibeus lituratus	HQ702535	761		Artibeus lituratus	EF080104	657
	Artibeus lituratus	GQ861670	761		Artibeus lituratus	EF080105	657
	Artibeus lituratus	GQ861668	761		Artibeus lituratus	EU096563	657
	Artibeus lituratus	GQ861609	761		Artibeus lituratus	EU096565	657
	Artibeus lituratus	GQ861607	761		Artibeus lituratus	EU096567	657
	Artibeus lituratus	GQ861605	1140		Artibeus lituratus	EU096568	657
	Artibeus lituratus	GQ861604	1140		Artibeus lituratus	EU096572	657
	Artibeus lituratus	GQ861603	1140		Artibeus lituratus	EU096575	657
	Artibeus lituratus	GQ861602	1140		Artibeus lituratus	EU096577	642
	Artibeus lituratus	GQ861601	1140		Artibeus lituratus	EU096581	657
	Artibeus lituratus	EU160833	1140		Artibeus lituratus	EU161013	501
	Artibeus lituratus	EU160832	1140		Artibeus lituratus	EU161017	501
	Artibeus lituratus	EU160831	1140		Artibeus lituratus	EU161019	501
	Artibeus lituratus	EU160830	1140		Artibeus lituratus	EU161023	501
	Artibeus lituratus	EU160829	1140		Artibeus lituratus	EU161027	501
	Artibeus lituratus	EU160828	1140		Artibeus lituratus	EU161028	501
	Artibeus lituratus	EU160827	1140		Artibeus lituratus	EU161030	501
	Artibeus lituratus	EU160826	1140		Artibeus lituratus	EU161031	501
	Artibeus lituratus	EU160825	1140		Artibeus lituratus	HQ545463	657
	Artibeus lituratus	EU160824	1140		Artibeus lituratus	HQ545478	657
	Artibeus lituratus	EU160823	1140		Artibeus lituratus	HQ545599	657
	Artibeus lituratus	EU160822	1140		Artibeus lituratus	HQ624999	410
	Artibeus lituratus	EU160821	1140		Artibeus lituratus	JF445316	657
	Artibeus lituratus	EU160820	1140		Artibeus lituratus	JF446314	656
	Artibeus lituratus	EU160819	1140		Artibeus lituratus	JF446315	657
	Artibeus lituratus	EU160818	1140		Artibeus lituratus	JF446332	657
	Artibeus lituratus	EU160817	1140		Artibeus lituratus	JF446334	657
	Artibeus lituratus	EU160816	1140		Artibeus lituratus	JF446337	657
	Artibeus lituratus	EU160815	1140		Artibeus lituratus	JF446338	657
	Artibeus lituratus	EU160814	1140		Artibeus lituratus	JF446339	657
	Artibeus lituratus	EU160813	1140		Artibeus lituratus	JF446340	657
	Artibeus lituratus	EU160812	1140		Artibeus lituratus	JF446343	636
	Artibeus lituratus	EU160811	1140		Artibeus lituratus	JF446346	657
	Artibeus lituratus	EU160810	1140		Artibeus lituratus	JF446348	657
	Artibeus lituratus	EU160809	1140		Artibeus lituratus	JF446573	657
	Artibeus lituratus	EU160808	1140		Artibeus lituratus	JF446574	657
	Artibeus lituratus	EU160807	1140		Artibeus lituratus	JF446654	657
	Artibeus lituratus	EU160806	1140		Artibeus lituratus	JF446656	657
	Artibeus lituratus	EU160805	1140		Artibeus lituratus	JF446658	657
	Artibeus lituratus	EU160804	1140		Artibeus lituratus	JF446660	657
	Artibeus lituratus	EU160803	1140		Artibeus lituratus	JF446661	657
	Artibeus lituratus	EU160802	1140		Artibeus lituratus	JF446662	657
	Artibeus lituratus	EU160801	1140		Artibeus lituratus	JF446663	657
	Artibeus lituratus	EU160800	1140		Artibeus lituratus	JF446664	657
	Artibeus lituratus	EU160799	1140		Artibeus lituratus	JF446666	657
	Artibeus lituratus	EU160798	1140		Artibeus lituratus	JF446670	657
	Artibeus lituratus	EU160797	1140		Artibeus lituratus	JF446675	657
	Artibeus lituratus	EU160796	1140		Artibeus lituratus	JF446676	657
	Artibeus lituratus	EU160795	1140		Artibeus lituratus	JF446677	657
	Artibeus lituratus	EU160794	1140		Artibeus lituratus	JF446679	657
	Artibeus lituratus	EU160793	1140		Artibeus lituratus	JF447077	657
	Artibeus lituratus	EU160792	1140		Artibeus lituratus	JF447078	657
	Artibeus lituratus	EU160791	1140		Artibeus lituratus	JF447080	657
	Artibeus lituratus	EU160790	1140		Artibeus lituratus	JF447082	657
	Artibeus lituratus	EU160789	1140		Artibeus lituratus	JF447083	657
	Artibeus lituratus	EU160788	1140		Artibeus lituratus	JF447084	656
	Artibeus lituratus	EU160787	1140		Artibeus lituratus	JF447087	657
	Artibeus lituratus	EU160786	1140		Artibeus lituratus	JF447090	657
	Artibeus lituratus	EU160785	1140		Artibeus lituratus	JF447091	657
	Artibeus lituratus	EU160784	1140		Artibeus lituratus	JF447092	657
	Artibeus lituratus	EU160783	1140		Artibeus lituratus	JF447093	657
	Artibeus lituratus	EU160782	1140		Artibeus lituratus	JF447094	657
	Artibeus lituratus	EU160781	1140		Artibeus lituratus	JF447095	657
	Artibeus lituratus	EU160780	1140		Artibeus lituratus	JF447096	657
	Artibeus lituratus	EU160779	1140		Artibeus lituratus	JF447097	638
	Artibeus lituratus	EU160778	1140		Artibeus lituratus	JF447098	657
	Artibeus lituratus	EU160777	1140		Artibeus lituratus	JF447099	657
	Artibeus lituratus	EU160776	1140		Artibeus lituratus	JF447102	657
	Artibeus lituratus	EU160775	1140		Artibeus lituratus	JF447107	657
	Artibeus lituratus	EU160774	1140		Artibeus lituratus	JF447109	657
	Artibeus lituratus	EU160773	1140		Artibeus lituratus	JF447110	657
	Artibeus lituratus	EU160772	1140		Artibeus lituratus	JF447114	657
	Artibeus lituratus	EU160771	1140		Artibeus lituratus	JF447115	657
	Artibeus lituratus	EU160770	1140		Artibeus lituratus	JF447117	657
	Artibeus lituratus	EU160769	1140		Artibeus lituratus	JF447118	657
	Artibeus lituratus	EU160768	1140		Artibeus lituratus	JF447119	657
	Artibeus lituratus	EU160767	1140		Artibeus lituratus	JF447123	657
	Artibeus lituratus	EU160766	1140		Artibeus lituratus	JF447132	657
	Artibeus lituratus	EU160765	1140		Artibeus lituratus	JF447140	657
	Artibeus lituratus	EU160764	1140		Artibeus lituratus	JF447351	657
	Artibeus lituratus	EU160763	1140		Artibeus lituratus	JF447352	657
	Artibeus lituratus	EU160762	1140		Artibeus lituratus	JF447492	655
	Artibeus lituratus	EU160761	1140		Artibeus lituratus	JF447496	657
	Artibeus lituratus	EU160760	1140		Artibeus lituratus	JF447501	657
	Artibeus lituratus	EU160759	1140		Artibeus lituratus	JF447503	657
	Artibeus lituratus	EU160758	1140		Artibeus lituratus	JF447506	657
	Artibeus lituratus	EU160757	1140		Artibeus lituratus	JF447508	657
	Artibeus lituratus	EU160756	1140		Artibeus lituratus	JF447510	657
	Artibeus lituratus	EU160755	1140		Artibeus lituratus	JF447511	645
	Artibeus lituratus	EU160754	1140		Artibeus lituratus	JF447513	653
	Artibeus lituratus	EU160753	1140		Artibeus lituratus	JF447516	657
	Artibeus lituratus	EU160752	1140		Artibeus lituratus	JF447517	657
	Artibeus lituratus	EU160751	1140		Artibeus lituratus	JF447521	657
	Artibeus lituratus	EU160750	1140		Artibeus lituratus	JF447523	657
	Artibeus lituratus	EU160749	1140		Artibeus lituratus	JF448572	657
	Artibeus lituratus	EU160748	1140		Artibeus lituratus	JF448573	657
	Artibeus lituratus	EU160747	1140		Artibeus lituratus	JF448574	657
	Artibeus lituratus	EU160746	1140		Artibeus lituratus	JF448580	657
	Artibeus lituratus	EU160745	1140		Artibeus lituratus	JF448582	657
	Artibeus lituratus	EU160744	1140		Artibeus lituratus	JF448584	638
	Artibeus lituratus	EU160743	1140		Artibeus lituratus	JF448585	657
	Artibeus lituratus	EU160742	1140		Artibeus lituratus	JF448588	655
	Artibeus lituratus	EU160741	1140		Artibeus lituratus	JF448589	657
	Artibeus lituratus	EU160740	1140		Artibeus lituratus	JF448590	657
	Artibeus lituratus	EU160739	1140		Artibeus lituratus	JF448591	657
	Artibeus lituratus	EU160738	1140		Artibeus lituratus	JF448593	657
	Artibeus lituratus	EU160737	1140		Artibeus lituratus	JF448594	657
	Artibeus lituratus	EU160736	1140		Artibeus lituratus	JF452526	657
	Artibeus lituratus	EU160735	1140		Artibeus lituratus	JF452527	657
	Artibeus lituratus	EU160734	1140		Artibeus lituratus	JF452533	657
	Artibeus lituratus	EU160733	1140		Artibeus lituratus	JF452534	657
	Artibeus lituratus	EU160732	1140		Artibeus lituratus	JF452537	657
	Artibeus lituratus	EU160731	1140		Artibeus lituratus	JF452538	657
	Artibeus lituratus	EU160730	1140		Artibeus lituratus	JF452539	657
	Artibeus lituratus	EU160729	1140		Artibeus lituratus	JF452541	657
	Artibeus lituratus	EU160728	401		Artibeus lituratus	JF452552	657
	Artibeus lituratus	EU160727	430		Artibeus lituratus	JF452554	657
	Artibeus lituratus	EU160726	397		Artibeus lituratus	JF452556	657
	Artibeus lituratus	EU160725	440		Artibeus lituratus	JF452557	657
	Artibeus lituratus	EU160724	430		Artibeus lituratus	JF452559	655
	Artibeus lituratus	DQ985499	1140		Artibeus lituratus	JF452560	657
	Artibeus lituratus	DQ985496	439		Artibeus lituratus	JF452564	657
	Artibeus lituratus	DQ985495	1140		Artibeus lituratus	JF452572	657
	Artibeus lituratus	DQ985494	1122		Artibeus lituratus	JF452576	657
	Artibeus lituratus	DQ985493	1140		Artibeus lituratus	JF452581	657
	Artibeus lituratus	DQ985492	1140		Artibeus lituratus	JF452583	657
	Artibeus lituratus	DQ985485	1140		Artibeus lituratus	JF452588	656
	Artibeus lituratus	DQ985484	1140		Artibeus lituratus	JF452591	657
	Artibeus lituratus	DQ985483	1140		Artibeus lituratus	JF452593	657
	Artibeus lituratus	DQ985482	1140		Artibeus lituratus	JF452597	657
	Artibeus lituratus	DQ985481	1140		Artibeus lituratus	JF452598	657
	Artibeus lituratus	DQ985480	1140		Artibeus lituratus	JF452602	657
	Artibeus lituratus	DQ903819	1140		Artibeus lituratus	JF452603	657
	Artibeus lituratus	DQ869393	1140		Artibeus lituratus	JF452610	648
	Artibeus obscurus	U66507	1140		Artibeus lituratus	JF452612	644
	Artibeus obscurus	U66506	1140		Artibeus lituratus	JF452615	657
	Artibeus obscurus	MG704583	1140		Artibeus lituratus	JF452616	657
	Artibeus obscurus	MG704581	1140		Artibeus lituratus	JF452620	657
	Artibeus obscurus	MG704580	1140		Artibeus lituratus	JF452622	657
	Artibeus obscurus	MG704579	1140		Artibeus lituratus	JF452623	657
	Artibeus obscurus	MG704578	1140		Artibeus lituratus	JF452626	657
	Artibeus obscurus	MG704577	1140		Artibeus lituratus	JF452627	657
	Artibeus obscurus	MG704576	1140		Artibeus lituratus	JF452628	657
	Artibeus obscurus	MG704575	1140		Artibeus lituratus	JF452630	657
	Artibeus obscurus	MG704574	1140		Artibeus lituratus	JF452631	657
	Artibeus obscurus	MG704573	1140		Artibeus lituratus	JF452633	657
	Artibeus obscurus	MG704572	1140		Artibeus lituratus	JF452635	657
	Artibeus obscurus	MG704571	1140		Artibeus lituratus	JF452636	657
	Artibeus obscurus	JX444084	1140		Artibeus lituratus	JF452641	657
	Artibeus obscurus	GU932714	1140		Artibeus lituratus	JF452645	657
	Artibeus obscurus	GU932713	1140		Artibeus lituratus	JF452650	657
	Artibeus obscurus	GU932712	1140		Artibeus lituratus	JF452655	657
	Artibeus obscurus	GU932711	1140		Artibeus lituratus	JF452656	657
	Artibeus obscurus	GU932710	1140		Artibeus lituratus	JF452657	657
	Artibeus obscurus	GU932709	1140		Artibeus lituratus	JF452659	657
	Artibeus obscurus	GU932706	1140		Artibeus lituratus	JF452663	657
	Artibeus obscurus	GU932704	1140		Artibeus lituratus	JF452664	657
	Artibeus obscurus	GU932702	1140		Artibeus lituratus	JF452665	657
	Artibeus obscurus	GU932701	1140		Artibeus lituratus	JF452666	657
	Artibeus obscurus	GU932700	1140		Artibeus lituratus	JF452667	657
	Artibeus obscurus	GU932698	1140		Artibeus lituratus	JF452683	657
	Artibeus obscurus	GU932696	1140		Artibeus lituratus	JF452684	657
	Artibeus obscurus	GU932694	1140		Artibeus lituratus	JF452685	657
	Artibeus obscurus	GU932693	1140		Artibeus lituratus	JF452686	657
	Artibeus obscurus	GU932692	1140		Artibeus lituratus	JF452691	657
	Artibeus obscurus	GU932691	1140		Artibeus lituratus	JF452697	657
	Artibeus obscurus	GU932690	1140		Artibeus lituratus	JF452698	657
	Artibeus obscurus	GU932689	1140		Artibeus lituratus	JF452702	657
	Artibeus obscurus	GU932688	1140		Artibeus lituratus	JF452703	654
	Artibeus obscurus	GU932687	1110		Artibeus lituratus	JF452704	657
	Artibeus obscurus	GU932686	1110		Artibeus lituratus	JF452705	657
	Artibeus obscurus	GU932685	1110		Artibeus lituratus	JF452706	657
	Artibeus obscurus	GU932684	1110		Artibeus lituratus	JF452707	657
	Artibeus obscurus	GU356393	1110		Artibeus lituratus	JF452718	657
	Artibeus obscurus	EU160865	1110		Artibeus lituratus	JF452721	657
	Artibeus obscurus	EU160864	1110		Artibeus lituratus	JF452723	657
	Artibeus obscurus	EU160863	1110		Artibeus lituratus	JF452724	657
	Artibeus obscurus	EU160862	1110		Artibeus lituratus	JF452726	657
	Artibeus obscurus	EU160861	1110		Artibeus lituratus	JF452729	657
	Artibeus obscurus	EU160860	1110		Artibeus lituratus	JF452730	656
	Artibeus obscurus	EU160859	1110		Artibeus lituratus	JF452733	656
	Artibeus obscurus	EU160858	1110		Artibeus lituratus	JF452737	657
	Artibeus obscurus	EU160857	1110		Artibeus lituratus	JF452739	657
	Artibeus obscurus	EU160856	1110		Artibeus lituratus	JF452742	657
	Artibeus obscurus	EU160855	1110		Artibeus lituratus	JF452743	657
	Artibeus obscurus	EU160854	1110		Artibeus lituratus	JF452744	657
	Artibeus obscurus	EU160853	1072		Artibeus lituratus	JF452749	657
	Artibeus obscurus	EU160852	1110		Artibeus lituratus	JF452753	657
	Artibeus obscurus	EU160851	1110		Artibeus lituratus	JF452754	657
	Artibeus obscurus	EU160850	1110		Artibeus lituratus	JF452755	638
	Artibeus obscurus	EU160849	1110		Artibeus lituratus	JF452758	657
	Artibeus obscurus	EU160848	1110		Artibeus lituratus	JF452759	657
	Artibeus obscurus	EU160847	1110		Artibeus lituratus	JF452762	657
	Artibeus obscurus	EU160846	1140		Artibeus lituratus	JF452763	657
	Artibeus obscurus	EU160845	585		Artibeus lituratus	JF452766	657
	Artibeus obscurus	EU160844	585		Artibeus lituratus	JF452770	657
	Artibeus obscurus	EU160843	585		Artibeus lituratus	JF452772	657
	Artibeus obscurus	EU160842	585		Artibeus lituratus	JF452775	657
	Artibeus obscurus	EU160841	585		Artibeus lituratus	JF452777	657
	Artibeus obscurus	EU160840	585		Artibeus lituratus	JF452779	657
	Artibeus obscurus	EU160839	585		Artibeus lituratus	JF452781	657
	Artibeus obscurus	EU160838	585		Artibeus lituratus	JF452789	657
	Artibeus obscurus	EU160837	585		Artibeus lituratus	JF452791	657
	Artibeus obscurus	EU160836	585		Artibeus lituratus	JF452792	657
	Artibeus obscurus	EU160835	585		Artibeus lituratus	JF452796	657
	Artibeus obscurus	EU160834	585		Artibeus lituratus	JF452798	657
	Artibeus obscurus	DQ869392	1140		Artibeus lituratus	JF452799	657
	Artibeus obscurus	AY642921	1140		Artibeus lituratus	JF452800	638
	Artibeus planirostris	U66508	1140		Artibeus lituratus	JF452805	657
	Artibeus planirostris	DQ869433	1140		Artibeus lituratus	JF452806	657
	Artibeus planirostris	DQ869432	1140		Artibeus lituratus	JF452810	657
	Artibeus planirostris	DQ869425	1140		Artibeus lituratus	JF452812	657
	Artibeus planirostris	DQ869424	1140		Artibeus lituratus	JF452817	657
	Artibeus planirostris	DQ869422	1140		Artibeus lituratus	JF452818	635
	Artibeus planirostris	DQ869396	1140		Artibeus lituratus	JF452819	638
	Artibeus planirostris	DQ869395	1140		Artibeus lituratus	JF452824	639
	Artibeus planirostris	DQ869394	1140		Artibeus lituratus	JF452825	657
	Artibeus planirostris	MH043363	1140		Artibeus lituratus	JF452826	657
	Artibeus planirostris	KT149210	1140		Artibeus lituratus	JF452827	648
	Artibeus planirostris	KT149209	1140		Artibeus lituratus	JF452828	657
	Artibeus planirostris	KT149208	1140		Artibeus lituratus	JF452833	657
	Artibeus planirostris	KT149206	1140		Artibeus lituratus	JF452837	657
	Artibeus planirostris	KT149201	1140		Artibeus lituratus	JF452838	655
	Artibeus planirostris	KT149200	1140		Artibeus lituratus	JF452840	657
	Artibeus planirostris	KT149199	1140		Artibeus lituratus	JF452841	657
	Artibeus planirostris	KT149198	1140		Artibeus lituratus	JF452850	657
	Artibeus planirostris	KT149196	1140		Artibeus lituratus	JF452853	657
	Artibeus planirostris	KT149194	1140		Artibeus lituratus	JF452856	657
	Artibeus planirostris	KT149193	1140		Artibeus lituratus	JF452858	657
	Artibeus planirostris	KT149192	1140		Artibeus lituratus	JF452861	657
	Artibeus planirostris	KT149190	1140		Artibeus lituratus	JF452863	657
	Artibeus planirostris	JX444086	1140		Artibeus lituratus	JF452865	657
	Artibeus planirostris	JX444085	1140		Artibeus lituratus	JF452866	657
	Artibeus planirostris	DQ869418	1140		Artibeus lituratus	JF452870	657
	Artibeus planirostris	DQ869417	1140		Artibeus lituratus	JF452872	657
	Artibeus planirostris	DQ869416	1140		Artibeus lituratus	JF452875	657
	Artibeus planirostris	DQ869415	1140		Artibeus lituratus	JF452876	657
	Artibeus planirostris	DQ869414	1140		Artibeus lituratus	JF452879	657
	Artibeus planirostris	DQ869413	1140		Artibeus lituratus	JF452880	657
	Artibeus planirostris	DQ869412	1140		Artibeus lituratus	JF452881	657
	Artibeus planirostris	DQ869411	1140		Artibeus lituratus	JF452882	657
	Artibeus planirostris	DQ869410	1140		Artibeus lituratus	JF452883	657
	Artibeus planirostris	DQ869409	1140		Artibeus lituratus	JF452885	657
	Artibeus planirostris	DQ869408	1140		Artibeus lituratus	JF459081	657
	Artibeus planirostris	DQ869407	1140		Artibeus lituratus	JF498921	657
	Artibeus planirostris	DQ869406	1140		Artibeus lituratus	JN209840	657
	Artibeus planirostris	DQ869405	1140		Artibeus lituratus	JQ600004	656
	Artibeus planirostris	DQ869404	1140		Artibeus lituratus	JQ601182	657
	Artibeus planirostris	DQ869403	1140		Artibeus lituratus	KU295488	579
	Artibeus planirostris	DQ869402	1140		Artibeus lituratus	MG191805	652
	Artibeus planirostris	DQ869401	1140		Artibeus lituratus	MG191818	641
	Artibeus planirostris	DQ869400	1140		Artibeus lituratus	MG191859	557
	Artibeus planirostris	DQ869399	1140		Artibeus lituratus	MK749466	657
	Artibeus planirostris	DQ869397	1140		Artibeus lituratus	MK749467	657
	Artibeus planirostris	DQ869436	1140		Artibeus lituratus	MK749468	657
	Artibeus planirostris	GQ861708	1140		Artibeus lituratus	MK749469	657
	Artibeus planirostris	GQ861707	1140		Artibeus lituratus	MK749470	657
	Artibeus planirostris	GQ861701	1140		Artibeus lituratus	MK749471	657
	Artibeus planirostris	GQ861699	1140		Artibeus lituratus	MK749472	657
	Artibeus planirostris	GQ861698	1140		Artibeus lituratus	MK749473	657
	Artibeus planirostris	GQ861696	1140		Artibeus lituratus	MK749474	657
	Artibeus planirostris	GQ861695	1140		Artibeus lituratus	MK749475	657
	Artibeus planirostris	GQ861684	1140		Artibeus lituratus	MK749478	657
	Artibeus planirostris	GQ861681	1140		Artibeus lituratus	016871	657
	Artibeus planirostris	GQ861680	1140		Artibeus lituratus	OK398131	657
	Artibeus planirostris	GQ861679	1140		Artibeus lituratus	OK398132	622
	Artibeus planirostris	GQ861676	1140		Artibeus lituratus	OK398133	656
	Artibeus planirostris	GQ861673	1140		Artibeus lituratus	OK398134	657
	Artibeus planirostris	GQ861613	1140		Artibeus lituratus	OK398135	639
	Artibeus planirostris	GQ861610	1140		Artibeus lituratus	OK398136	521
	Artibeus planirostris	DQ869426	1140		Artibeus lituratus	OK398137	573
	Artibeus planirostris	DQ869398	1140		Artibeus lituratus	OL455610	657
	Artibeus planirostris	EU160945	1140		Artibeus lituratus	OL455611	657
	Artibeus planirostris	EU160944	1140		Artibeus lituratus	OL455612	631
	Artibeus planirostris	EU160943	1140		Artibeus lituratus	OM181933	574
	Artibeus planirostris	EU160942	1140		Artibeus lituratus	OM957497	657
	Artibeus planirostris	EU160941	1140		Artibeus lituratus	OM957540	657
	Artibeus planirostris	EU160940	1140		Artibeus lituratus	OM959229	657
	Artibeus planirostris	EU160939	1140		Artibeus lituratus	OM960560	657
	Artibeus planirostris	EU160938	1140		Artibeus lituratus	OM960967	657
	Artibeus planirostris	EU160937	1140		Artibeus lituratus	OM960970	657
	Artibeus planirostris	EU160936	1140		Artibeus lituratus	OM960971	657
	Artibeus planirostris	EU160935	1140		Artibeus lituratus	OM960972	657
	Artibeus planirostris	EU160934	1140		Artibeus lituratus	OM961046	657
	Artibeus planirostris	EU160933	1140		Artibeus lituratus	ON357725	657
	Artibeus planirostris	EU160932	1140		Artibeus obscurus	EF080106	657
	Artibeus planirostris	EU160931	1140		Artibeus obscurus	EF080107	657
	Artibeus planirostris	EU160930	1140		Artibeus obscurus	EF080108	651
	Artibeus planirostris	EU160929	1140		Artibeus obscurus	EF080110	657
	Artibeus planirostris	EU160928	1140		Artibeus obscurus	EF080111	657
	Artibeus planirostris	EU160927	1140		Artibeus obscurus	EF080112	657
	Artibeus planirostris	EU160926	1140		Artibeus obscurus	EF080113	657
	Artibeus planirostris	EU160925	1140		Artibeus obscurus	EF080116	657
	Artibeus planirostris	EU160924	1140		Artibeus obscurus	EF080117	657
	Artibeus planirostris	EU160923	1140		Artibeus obscurus	EU096585	657
	Artibeus planirostris	EU160922	1140		Artibeus obscurus	EU096593	657
	Artibeus planirostris	EU160921	1140		Artibeus obscurus	EU096595	608
	Artibeus planirostris	EU160920	1140		Artibeus obscurus	EU161034	501
	Artibeus planirostris	EU160919	1140		Artibeus obscurus	EU161035	501
	Artibeus planirostris	EU160918	458		Artibeus obscurus	EU161036	501
	Artibeus planirostris	EU160917	443		Artibeus obscurus	EU161037	501
	Artibeus planirostris	EU160916	440		Artibeus obscurus	EU161038	501
	Artibeus planirostris	EU160915	1140		Artibeus obscurus	EU161039	501
	Artibeus planirostris	EU160914	1140		Artibeus obscurus	EU161040	501
	Artibeus planirostris	EU160913	1140		Artibeus obscurus	EU161041	501
	Artibeus planirostris	EU160912	442		Artibeus obscurus	EU161042	501
	Artibeus planirostris	EU160911	443		Artibeus obscurus	EU161043	501
	Artibeus planirostris	EU160910	1140		Artibeus obscurus	EU161044	501
	Artibeus planirostris	EU160909	1140		Artibeus obscurus	HQ545508	657
	Artibeus planirostris	EU160908	1140		Artibeus obscurus	HQ545513	657
	Artibeus planirostris	EU160907	444		Artibeus obscurus	HQ545552	657
	Artibeus planirostris	EU160906	432		Artibeus obscurus	HQ545633	657
	Artibeus planirostris	EU160905	1140		Artibeus obscurus	HQ545665	657
	Artibeus planirostris	EU160904	1140		Artibeus obscurus	HQ919672	657
	Artibeus planirostris	EU160903	1140		Artibeus obscurus	JF447535	657
	Artibeus planirostris	EU160902	1140		Artibeus obscurus	JF447538	657
	Artibeus planirostris	EU160900	1140		Artibeus obscurus	JF447778	657
	Artibeus planirostris	EU160899	1140		Artibeus obscurus	JF447779	657
	Artibeus planirostris	EU160898	1140		Artibeus obscurus	JF448610	657
	Artibeus planirostris	EU160897	1140		Artibeus obscurus	JF448613	657
	Artibeus planirostris	EU160896	1140		Artibeus obscurus	JF448614	657
	Artibeus planirostris	EU160895	1140		Artibeus obscurus	JF448626	657
	Artibeus planirostris	EU160894	1140		Artibeus obscurus	JF448632	657
	Artibeus planirostris	EU160893	1140		Artibeus obscurus	JF448634	657
	Artibeus planirostris	EU160892	1140		Artibeus obscurus	JF448635	657
	Artibeus planirostris	EU160891	1140		Artibeus obscurus	JF448637	657
	Artibeus planirostris	EU160890	1140		Artibeus obscurus	JF448638	657
	Artibeus planirostris	EU160889	1140		Artibeus obscurus	JF452886	657
	Artibeus planirostris	EU160888	1140		Artibeus obscurus	JF452905	657
	Artibeus planirostris	EU160887	1140		Artibeus obscurus	JF452906	657
	Artibeus planirostris	EU160886	1140		Artibeus obscurus	JF452908	657
	Artibeus planirostris	EU160885	1140		Artibeus obscurus	JF452912	657
	Artibeus planirostris	EU160884	1140		Artibeus obscurus	JF452914	657
	Artibeus planirostris	EU160883	1140		Artibeus obscurus	JF452916	657
	Artibeus planirostris	EU160882	1140		Artibeus obscurus	JF452919	657
	Artibeus planirostris	EU160881	1140		Artibeus obscurus	JF452925	657
	Artibeus planirostris	EU160880	716		Artibeus obscurus	JF452927	657
	Artibeus planirostris	EU160879	716		Artibeus obscurus	JF452943	657
	Artibeus planirostris	EU160878	716		Artibeus obscurus	JF452956	657
	Artibeus planirostris	EU160877	716		Artibeus obscurus	JF452976	657
	Artibeus planirostris	EU160876	716		Artibeus obscurus	JF453004	657
	Artibeus planirostris	EU160875	716		Artibeus obscurus	JF453011	651
	Artibeus planirostris	EU160874	716		Artibeus obscurus	JF453012	657
	Artibeus planirostris	EU160873	716		Artibeus obscurus	JF453026	657
	Artibeus planirostris	EU160872	716		Artibeus obscurus	JF453029	657
	Artibeus planirostris	EU160871	716		Artibeus obscurus	JF453035	657
	Artibeus planirostris	EU160870	716		Artibeus obscurus	JF453053	657
	Artibeus planirostris	EU160869	716		Artibeus obscurus	JF453061	657
	Artibeus planirostris	EU160868	716		Artibeus obscurus	JF453062	657
	Artibeus planirostris	EU160867	632		Artibeus obscurus	JF453064	657
	Artibeus planirostris	EU160866	1140		Artibeus obscurus	JF453066	657
	Artibeus planirostris	AY642920	1140		Artibeus obscurus	JF453103	657
	Artibeus planirostris	AY642919	1140		Artibeus obscurus	JF453104	657
	Artibeus planirostris	AY642918	1140		Artibeus obscurus	JF453118	657
	Artibeus planirostris	AY642917	1140		Artibeus obscurus	JF453127	657
	Artibeus planirostris	AY642916	1140		Artibeus obscurus	JF453134	657
	Artibeus planirostris	AY642915	1140		Artibeus obscurus	JF453139	657
	Artibeus planirostris	AY642914	1140		Artibeus obscurus	JF453156	657
	Artibeus planirostris	AY642913	1140		Artibeus obscurus	JF453161	657
	Artibeus schwartzi	MH043364	594		Artibeus obscurus	JF453163	657
	Artibeus schwartzi	GQ861782	1140		Artibeus obscurus	JF453172	657
	Artibeus schwartzi	GQ861771	397		Artibeus obscurus	JF453177	657
	Artibeus schwartzi	GQ861762	451		Artibeus obscurus	JF453180	657
	Artibeus schwartzi	GQ861726	457		Artibeus obscurus	JF453194	657
	Artibeus schwartzi	GQ861722	1140		Artibeus obscurus	JF453209	657
	Artibeus schwartzi	GQ861632	441		Artibeus obscurus	JF453219	657
	Artibeus schwartzi	DQ869523	594		Artibeus obscurus	JF453228	657
	Artibeus sp.	DQ985503	761		Artibeus obscurus	JF453231	657
					Artibeus obscurus	JF453232	657
					Artibeus obscurus	JF453237	657
					Artibeus obscurus	JF453266	657
					Artibeus obscurus	JF453268	657
					Artibeus obscurus	JF453275	657
					Artibeus obscurus	JF453285	657
					Artibeus obscurus	JF453286	604
					Artibeus obscurus	JF453295	657
					Artibeus obscurus	JF453298	657
					Artibeus obscurus	JF453299	657
					Artibeus obscurus	JF453307	657
					Artibeus obscurus	JF459086	649
					Artibeus obscurus	JQ601166	657
					Artibeus obscurus	JQ601233	657
					Artibeus obscurus	JQ601296	657
					Artibeus obscurus	JQ601351	538
					Artibeus obscurus	JQ601393	657
					Artibeus obscurus	KU295489	579
					Artibeus obscurus	MG704548	618
					Artibeus obscurus	MG704550	618
					Artibeus obscurus	MG704551	618
					Artibeus obscurus	MG704552	618
					Artibeus obscurus	MG704553	618
					Artibeus obscurus	MG704554	618
					Artibeus obscurus	MG704559	618
					Artibeus obscurus	MG704560	618
					Artibeus obscurus	MG704561	618
					Artibeus obscurus	MG704562	618
					Artibeus obscurus	MG704563	618
					Artibeus obscurus	MG704565	618
					Artibeus obscurus	MG704566	618
					Artibeus obscurus	MG704567	618
					Artibeus obscurus	MG704570	617
					Artibeus phaeotis	HM208651	412
					Artibeus phaeotis	JF446683	657
					Artibeus phaeotis	JF446693	657
					Artibeus phaeotis	JF446694	657
					Artibeus phaeotis	JF446696	657
					Artibeus phaeotis	JF446697	657
					Artibeus phaeotis	JF446699	657
					Artibeus phaeotis	JF446701	657
					Artibeus phaeotis	JF446702	657
					Artibeus phaeotis	JF447145	657
					Artibeus phaeotis	JF447149	614
					Artibeus phaeotis	JF447152	643
					Artibeus phaeotis	JF447154	657
					Artibeus phaeotis	JF447155	657
					Artibeus phaeotis	JF447156	657
					Artibeus phaeotis	JF447163	657
					Artibeus phaeotis	JF447166	657
					Artibeus phaeotis	JF447172	657
					Artibeus phaeotis	JF447177	642
					Artibeus phaeotis	JF447178	657
					Artibeus phaeotis	JF498924	657
					Artibeus phaeotis	JF498925	657
					Artibeus phaeotis	JF498928	657
					Artibeus phaeotis	JF498930	657
					Artibeus phaeotis	JF498940	657
					Artibeus phaeotis	JF498945	657
					Artibeus phaeotis	JF498953	657
					Artibeus phaeotis	JQ601636	657
					Artibeus phaeotis	JQ601641	657
					Artibeus phaeotis	JQ601642	657
					Artibeus phaeotis	JQ601643	657
					Artibeus phaeotis	JQ601649	657
					Artibeus planirostris	EF080146	657
					Artibeus planirostris	EF080148	657
					Artibeus planirostris	EF080150	657
					Artibeus planirostris	EF080151	638
					Artibeus planirostris	EF080156	657
					Artibeus planirostris	EF080157	657
					Artibeus planirostris	EF080158	657
					Artibeus planirostris	EF080159	657
					Artibeus planirostris	EF080160	657
					Artibeus planirostris	EF080161	657
					Artibeus planirostris	EF080162	657
					Artibeus planirostris	EU096597	657
					Artibeus planirostris	EU096602	657
					Artibeus planirostris	EU096605	657
					Artibeus planirostris	EU096608	657
					Artibeus planirostris	EU096609	657
					Artibeus planirostris	EU096612	657
					Artibeus planirostris	EU096617	624
					Artibeus planirostris	EU096623	657
					Artibeus planirostris	EU096625	657
					Artibeus planirostris	EU161047	501
					Artibeus planirostris	EU161048	501
					Artibeus planirostris	EU161049	501
					Artibeus planirostris	EU161051	501
					Artibeus planirostris	EU161053	501
					Artibeus planirostris	EU161056	501
					Artibeus planirostris	EU161057	501
					Artibeus planirostris	EU161059	501
					Artibeus planirostris	EU161062	501
					Artibeus planirostris	EU161063	501
					Artibeus planirostris	HQ545539	657
					Artibeus planirostris	HQ545591	657
					Artibeus planirostris	JF447548	657
					Artibeus planirostris	JF447549	657
					Artibeus planirostris	JF447553	656
					Artibeus planirostris	JF447554	655
					Artibeus planirostris	JF447557	657
					Artibeus planirostris	JF447561	657
					Artibeus planirostris	JF447562	657
					Artibeus planirostris	JF447781	657
					Artibeus planirostris	JF447782	657
					Artibeus planirostris	JF447783	657
					Artibeus planirostris	JF447950	657
					Artibeus planirostris	JF447952	657
					Artibeus planirostris	JF447955	657
					Artibeus planirostris	JF447956	638
					Artibeus planirostris	JF447957	657
					Artibeus planirostris	JF448641	652
					Artibeus planirostris	JF448642	657
					Artibeus planirostris	JF448643	657
					Artibeus planirostris	JF448644	657
					Artibeus planirostris	JF448645	657
					Artibeus planirostris	JF448649	657
					Artibeus planirostris	JF448650	657
					Artibeus planirostris	JF448651	657
					Artibeus planirostris	JF448652	657
					Artibeus planirostris	JF448653	657
					Artibeus planirostris	JF448654	657
					Artibeus planirostris	JF448655	657
					Artibeus planirostris	JF448656	657
					Artibeus planirostris	JF448658	657
					Artibeus planirostris	JF448659	657
					Artibeus planirostris	JF448660	657
					Artibeus planirostris	JF448664	657
					Artibeus planirostris	JF448665	657
					Artibeus planirostris	JF448666	657
					Artibeus planirostris	JF448667	657
					Artibeus planirostris	JF448668	657
					Artibeus planirostris	JF448669	657
					Artibeus planirostris	JF448670	657
					Artibeus planirostris	JF448671	655
					Artibeus planirostris	JF448676	657
					Artibeus planirostris	JF448677	657
					Artibeus planirostris	JF448679	657
					Artibeus planirostris	JF448680	657
					Artibeus planirostris	JF448681	657
					Artibeus planirostris	JF453308	657
					Artibeus planirostris	JF453312	657
					Artibeus planirostris	JF453325	657
					Artibeus planirostris	JF453329	657
					Artibeus planirostris	JF453331	657
					Artibeus planirostris	JF453332	657
					Artibeus planirostris	JF453335	657
					Artibeus planirostris	JF453349	657
					Artibeus planirostris	JF453351	657
					Artibeus planirostris	JF453352	657
					Artibeus planirostris	JF453356	652
					Artibeus planirostris	JF453358	657
					Artibeus planirostris	JF453360	657
					Artibeus planirostris	JF453368	653
					Artibeus planirostris	JF453369	657
					Artibeus planirostris	JF453373	657
					Artibeus planirostris	JF453374	657
					Artibeus planirostris	JF453375	657
					Artibeus planirostris	JF453376	657
					Artibeus planirostris	JF453377	657
					Artibeus planirostris	JF453378	657
					Artibeus planirostris	JF453387	655
					Artibeus planirostris	JF453397	657
					Artibeus planirostris	JF453400	657
					Artibeus planirostris	JF453403	657
					Artibeus planirostris	JF453404	657
					Artibeus planirostris	JF453410	657
					Artibeus planirostris	JF453413	657
					Artibeus planirostris	JF453416	657
					Artibeus planirostris	JF453419	657
					Artibeus planirostris	JF453424	657
					Artibeus planirostris	JF453427	657
					Artibeus planirostris	JF453435	657
					Artibeus planirostris	JF453447	657
					Artibeus planirostris	JF453448	657
					Artibeus planirostris	JF453455	657
					Artibeus planirostris	JF453464	657
					Artibeus planirostris	JF453476	657
					Artibeus planirostris	JF453477	657
					Artibeus planirostris	JF453480	657
					Artibeus planirostris	JF453486	657
					Artibeus planirostris	JF453487	657
					Artibeus planirostris	JF453489	657
					Artibeus planirostris	JF453491	638
					Artibeus planirostris	JF453493	657
					Artibeus planirostris	JF453496	657
					Artibeus planirostris	JF453497	657
					Artibeus planirostris	JF453499	657
					Artibeus planirostris	JF453503	657
					Artibeus planirostris	JF453505	657
					Artibeus planirostris	JF453509	657
					Artibeus planirostris	JF453512	657
					Artibeus planirostris	JF453513	657
					Artibeus planirostris	JF453515	657
					Artibeus planirostris	JF453516	657
					Artibeus planirostris	JF453517	657
					Artibeus planirostris	JF453518	657
					Artibeus planirostris	JF453519	657
					Artibeus planirostris	JF453526	657
					Artibeus planirostris	JF453527	657
					Artibeus planirostris	JF453532	657
					Artibeus planirostris	JF453537	657
					Artibeus planirostris	JF453541	657
					Artibeus planirostris	JF453554	657
					Artibeus planirostris	JF453556	657
					Artibeus planirostris	JF453559	657
					Artibeus planirostris	JF453560	657
					Artibeus planirostris	JF453566	657
					Artibeus planirostris	JF453570	636
					Artibeus planirostris	JF453578	657
					Artibeus planirostris	JF453586	648
					Artibeus planirostris	JF453588	657
					Artibeus planirostris	JF453589	657
					Artibeus planirostris	JF453595	657
					Artibeus planirostris	JF453602	657
					Artibeus planirostris	JF453604	657
					Artibeus planirostris	JF453608	657
					Artibeus planirostris	JF453612	657
					Artibeus planirostris	JF453613	657
					Artibeus planirostris	JF453614	657
					Artibeus planirostris	JF453618	657
					Artibeus planirostris	JF453619	657
					Artibeus planirostris	JF453621	655
					Artibeus planirostris	JF453627	637
					Artibeus planirostris	JF453641	657
					Artibeus planirostris	JF453643	657
					Artibeus planirostris	JF453646	657
					Artibeus planirostris	JF453649	657
					Artibeus planirostris	JF453656	657
					Artibeus planirostris	JF453661	657
					Artibeus planirostris	JN312369	606
					Artibeus planirostris	JQ600005	657
					Artibeus planirostris	JQ601098	657
					Artibeus planirostris	JQ601112	657
					Artibeus planirostris	JQ601139	637
					Artibeus planirostris	JQ601145	636
					Artibeus planirostris	JQ601147	649
					Artibeus planirostris	JQ601169	641
					Artibeus planirostris	JQ601171	646
					Artibeus planirostris	JQ601232	657
					Artibeus planirostris	JQ601241	657
					Artibeus planirostris	JQ601283	657
					Artibeus planirostris	MK749479	657
					Artibeus planirostris	MK749484	657
					Artibeus planirostris	MK749485	657
					Artibeus planirostris	MK749486	657
					Artibeus planirostris	MK749487	657
					Artibeus planirostris	MK749488	657
					Artibeus planirostris	MK749489	657
					Artibeus planirostris	MK749491	657
					Artibeus planirostris	MW327555	578
					Artibeus planirostris	MW327557	578
					Artibeus planirostris	MW327558	578
					Artibeus planirostris	MW327559	578
					Artibeus planirostris	MW327560	578
					Artibeus planirostris	MW327563	578
					Artibeus planirostris	MW327564	578
					Artibeus planirostris	MW327565	578
					Artibeus planirostris	MW327566	578
					Artibeus planirostris	MW327567	578
					Artibeus planirostris	MW327569	578
					Artibeus planirostris	MW327570	578
					Artibeus planirostris	MW327571	578
					Artibeus planirostris	MW327572	578
					Artibeus planirostris	MW327574	578
					Artibeus planirostris	MW327575	578
					Artibeus planirostris	MW327576	578
					Artibeus planirostris	MW327577	578
					Artibeus planirostris	MW327578	578
					Artibeus planirostris	MW327579	578
					Artibeus planirostris	MW327580	578
					Artibeus planirostris	MW327581	578
					Artibeus planirostris	MW327582	578
					Artibeus planirostris	MW327583	578
					Artibeus planirostris	MW327584	578
					Artibeus planirostris	OM961052	657
					Artibeus planirostris	OM961141	657
					Artibeus planirostris	OM961178	657
					Artibeus planirostris	OM961395	657
					Artibeus planirostris	OM962796	657
					Artibeus planirostris	OM962966	657
					Artibeus planirostris	OM962967	657
					Artibeus planirostris	OM962970	657
					Artibeus sp.	JF444280	657
					Artibeus sp.	HQ919744	657
					Artibeus sp.	HQ919769	657
					Artibeus sp.	JN312367	645
					Artibeus sp.	HQ919722	657

## Sheet: Carollia
	Cytb				COI
	scientific name	Genbank Accession	Length (bp)		scientific name	Genbank Accession	Length (bp)
	Carollia brevicauda	AF187017	1140		Carollia brevicauda	JF448711	657
	Carollia brevicauda	AF187018	1140		Carollia brevicauda	JF448712	657
	Carollia brevicauda	AF187019	1140		Carollia brevicauda	JF448713	657
	Carollia castanea	AF187020	1140		Carollia brevicauda	JF448720	657
	Carollia castanea	AF187021	1140		Carollia brevicauda	JF448721	657
	Carollia castanea	AF187022	1140		Carollia brevicauda	JF448723	657
	Carollia subrufa	AF187023	1140		Carollia perspicillata	JF454168	657
	Carollia subrufa	AF187024	1140		Carollia perspicillata	JF454171	657
	Carollia perspicillata	AF187025	1140		Carollia brevicauda	EU096628	657
	Carollia perspicillata	AF187026	1140		Carollia brevicauda	EU096631	657
	Carollia perspicillata	AF435174	775		Carollia brevicauda	JF453702	657
	Carollia brevicauda	AF511951	1140		Carollia brevicauda	JF448714	657
	Carollia brevicauda	AF511952	1140		Carollia brevicauda	JF448715	657
	Carollia brevicauda	AF511953	1140		Carollia brevicauda	JF448717	657
	Carollia brevicauda	AF511954	1140		Carollia brevicauda	JF448729	657
	Carollia brevicauda	AF511955	1140		Carollia brevicauda	JF448730	657
	Carollia brevicauda	AF511956	1140		Carollia brevicauda	JF448732	657
	Carollia brevicauda	AF511957	1140		Carollia brevicauda	JF453678	657
	Carollia brevicauda	AF511958	1140		Carollia brevicauda	JF453679	657
	Carollia brevicauda	AF511959	1140		Carollia brevicauda	JF453704	657
	Carollia brevicauda	AF511960	1140		Carollia brevicauda	JF453705	657
	Carollia sowelli	AF511961	1140		Carollia perspicillata	JF447206	657
	Carollia sowelli	AF511962	1140		Carollia perspicillata	JF447208	657
	Carollia sowelli	AF511965	1140		Carollia perspicillata	JF447606	657
	Carollia sowelli	AF511966	1140		Carollia perspicillata	JF447607	657
	Carollia sowelli	AF511968	1140		Carollia perspicillata	JF447609	657
	Carollia sowelli	AF511969	1140		Carollia perspicillata	JF447614	657
	Carollia sowelli	AF511970	1140		Carollia perspicillata	JF453884	657
	Carollia sowelli	AF511971	1140		Carollia perspicillata	JF453886	657
	Carollia sowelli	AF511972	1140		Carollia perspicillata	JF453893	657
	Carollia sowelli	AF511973	1140		Carollia perspicillata	JF453929	657
	Carollia perspicillata	AF511974	1140		Carollia brevicauda	EF080173	657
	Carollia perspicillata	AF511975	1140		Carollia brevicauda	EF080179	657
	Carollia perspicillata	AF511976	1140		Carollia brevicauda	JF447984	657
	Carollia perspicillata	AF511977	1140		Carollia brevicauda	JF447986	657
	Carollia perspicillata	AF511978	1140		Carollia brevicauda	JF448691	657
	Carollia perspicillata	AF511979	1140		Carollia brevicauda	JF448696	657
	Carollia perspicillata	AF511980	1140		Carollia brevicauda	NC_066073	657
	Carollia perspicillata	AF511981	1140		Carollia brevicauda	JF447973	656
	Carollia perspicillata	AF511982	1140		Carollia brevicauda	JF453676	656
	Carollia perspicillata	AF511983	1140		Carollia brevicauda	EF080166	655
	Carollia perspicillata	AF511984	1140		Carollia brevicauda	EF080167	655
	Carollia perspicillata	AF511986	1140		Carollia brevicauda	EF080178	655
	Carollia perspicillata	AF511987	1140		Carollia brevicauda	EF080186	655
	Carollia perspicillata	AF511988	1140		Carollia brevicauda	JF447987	655
	Carollia perspicillata	AF511990	1140		Carollia brevicauda	JF453730	654
	Carollia perspicillata	AF511991	1140		Carollia brevicauda	JF448697	653
	Carollia castanea	AF511992	1140		Carollia brevicauda	JF448725	657
	Carollia castanea	AF511993	1140		Carollia brevicauda	JF448726	657
	Carollia castanea	AF511994	1140		Carollia brevicauda	JF448727	657
	Carollia castanea	AF511995	1140		Carollia brevicauda	EF080195	657
	Carollia castanea	AF511996	1140		Carollia brevicauda	EF080202	657
	Carollia castanea	AF511997	1140		Carollia brevicauda	EU096632	657
	Carollia castanea	AF511998	1140		Carollia brevicauda	EU096633	657
	Carollia castanea	AF511999	1140		Carollia brevicauda	EU096634	657
	Carollia castanea	AF512000	1140		Carollia brevicauda	EU096635	657
	Carollia castanea	AF512001	1140		Carollia brevicauda	EU096636	657
	Carollia castanea	AF512002	1140		Carollia brevicauda	EU096637	657
	Carollia castanea	AF512003	1140		Carollia brevicauda	EU096638	657
	Carollia castanea	AF512004	1140		Carollia brevicauda	EU096639	657
	Carollia castanea	AF512005	1140		Carollia brevicauda	JF453681	657
	Carollia castanea	AF512006	1140		Carollia brevicauda	JF453690	657
	Carollia benkeithi	DQ177280	1110		Carollia brevicauda	HQ919662	657
	Carollia benkeithi	DQ177281	1110		Carollia brevicauda	JF447375	657
	Carollia benkeithi	DQ177282	1110		Carollia brevicauda	JF447377	657
	Carollia castanea	DQ888276	1079		Carollia brevicauda	JF453693	657
	Carollia castanea	DQ888277	919		Carollia brevicauda	JF447574	657
	Carollia castanea	DQ888278	1011		Carollia brevicauda	JF447575	657
	Carollia brevicauda	DQ888279	1098		Carollia brevicauda	JF453706	657
	Carollia perspicillata	DQ888280	1051		Carollia brevicauda	EF080205	649
	Carollia brevicauda	DQ888283	1045		Carollia brevicauda	JF453708	657
	Carollia castanea	DQ888286	1078		Carollia brevicauda	JF447579	657
	Carollia castanea	DQ888288	544		Carollia brevicauda	JF447580	657
	Carollia castanea	DQ888289	1043		Carollia brevicauda	JF448700	657
	Carollia castanea	DQ888292	1020		Carollia brevicauda	JF448703	657
	Carollia castanea	DQ888294	790		Carollia brevicauda	JF448704	657
	Carollia perspicillata	DQ888296	816		Carollia brevicauda	JF448709	648
	Carollia castanea	DQ888298	802		Carollia brevicauda	JF448706	657
	Carollia brevicauda	DQ888300	807		Carollia brevicauda	JF453709	657
	Carollia brevicauda	DQ888305	825		Carollia brevicauda	JF453710	657
	Carollia perspicillata	DQ888306	813		Carollia brevicauda	JF453677	647
	Carollia brevicauda	FJ154120	1140		Carollia brevicauda	JF453715	657
	Carollia brevicauda	FJ589651	1140		Carollia brevicauda	JQ601123	657
	Carollia brevicauda	FJ589652	1140		Carollia brevicauda	JQ601130	657
	Carollia brevicauda	FJ589653	1140		Carollia brevicauda	JQ601144	657
	Carollia brevicauda	FJ589654	401		Carollia brevicauda	JQ601306	657
	Carollia perspicillata	FJ589655	1140		Carollia brevicauda	JF447576	646
	Carollia perspicillata	FJ589656	1140		Carollia brevicauda	JF453742	644
	Carollia perspicillata	FJ589657	1140		Carollia brevicauda	JF448716	643
	Carollia perspicillata	FJ589658	1140		Carollia brevicauda	JF448728	643
	Carollia perspicillata	FJ589659	1140		Carollia brevicauda	EU096627	642
	Carollia perspicillata	FJ589660	1140		Carollia brevicauda	JF447573	629
	Carollia perspicillata	FJ589661	1140		Carollia brevicauda	EU096647	622
	Carollia perspicillata	FJ589662	1140		Carollia brevicauda	EF080176	611
	Carollia perspicillata	FJ589663	1140		Carollia brevicauda	JF448692	602
	Carollia perspicillata	FJ589664	1140		Carollia brevicauda	JF447380	588
	Carollia perspicillata	FJ589665	1140		Carollia brevicauda	JF447584	566
	Carollia perspicillata	FJ589666	1140		Carollia castanea	JF447390	657
	Carollia perspicillata	FJ589667	1140		Carollia castanea	JF447391	657
	Carollia perspicillata	FJ589668	1140		Carollia castanea	JF447392	657
	Carollia perspicillata	FJ589669	1140		Carollia castanea	JF447393	657
	Carollia perspicillata	FJ589670	1140		Carollia castanea	JF448735	657
	Carollia perspicillata	FJ589671	1140		Carollia castanea	JF448736	657
	Carollia perspicillata	FJ589672	1140		Carollia castanea	JF448737	657
	Carollia perspicillata	FJ589673	1140		Carollia castanea	JF448749	657
	Carollia perspicillata	FJ589675	1140		Carollia castanea	JF448750	657
	Carollia perspicillata	FJ589676	1140		Carollia castanea	JF448751	657
	Carollia perspicillata	FJ589677	1140		Carollia castanea	JF448752	657
	Carollia perspicillata	FJ589678	1140		Carollia castanea	JF448754	657
	Carollia perspicillata	FJ589679	1140		Carollia castanea	JF448755	657
	Carollia perspicillata	FJ589680	1140		Carollia castanea	JF448758	657
	Carollia perspicillata	FJ589681	1140		Carollia castanea	JF448760	657
	Carollia perspicillata	FJ589682	1140		Carollia castanea	JF448770	657
	Carollia perspicillata	FJ589683	1140		Carollia castanea	JF448772	657
	Carollia perspicillata	FJ589684	1140		Carollia castanea	JF448773	657
	Carollia perspicillata	FJ589685	1140		Carollia castanea	JF448761	657
	Carollia perspicillata	FJ589686	1140		Carollia castanea	JF448763	657
	Carollia perspicillata	FJ589687	1140		Carollia castanea	JF448764	657
	Carollia perspicillata	FJ589688	1140		Carollia castanea	JF448766	657
	Carollia perspicillata	FJ589689	1140		Carollia castanea	JF446587	657
	Carollia perspicillata	FJ589690	1140		Carollia castanea	JF448738	657
	Carollia perspicillata	FJ589691	1140		Carollia castanea	JF448742	657
	Carollia perspicillata	FJ589692	1140		Carollia castanea	JF448743	657
	Carollia perspicillata	FJ589693	1140		Carollia castanea	MK749495	657
	Carollia perspicillata	FJ589694	1140		Carollia castanea	MK749497	657
	Carollia perspicillata	FJ589695	1140		Carollia castanea	MK749499	657
	Carollia perspicillata	FJ589696	1140		Carollia castanea	JF447381	657
	Carollia perspicillata	FJ589700	1140		Carollia castanea	JF447383	657
	Carollia perspicillata	FJ589701	1140		Carollia castanea	JF447385	657
	Carollia perspicillata	FJ589702	1140		Carollia castanea	JF447386	657
	Carollia perspicillata	FJ589703	1140		Carollia castanea	JF447389	657
	Carollia perspicillata	FJ589704	1140		Carollia castanea	NC_065677	657
	Carollia perspicillata	FJ589705	1140		Carollia castanea	JF448739	656
	Carollia perspicillata	FJ589706	1140		Carollia castanea	MG191801	655
	Carollia perspicillata	FJ589707	1140		Carollia castanea	JF446586	655
	Carollia perspicillata	FJ589708	1140		Carollia castanea	JF447989	653
	Carollia perspicillata	FJ589709	1140		Carollia castanea	MG191889	642
	Carollia perspicillata	FJ589710	1140		Carollia castanea	MG191836	632
	Carollia perspicillata	FJ589711	1140		Carollia castanea	MG191848	625
	Carollia perspicillata	FJ589712	1140		Carollia castanea	MG191826	620
	Carollia perspicillata	FJ589713	1140		Carollia castanea	MG191807	619
	Carollia perspicillata	FJ589714	1140		Carollia castanea	MG191842	554
	Carollia perspicillata	FJ589715	1140		Carollia perspicillata	EF080238	657
	Rhinophylla pumilio	HG003313	1140		Carollia perspicillata	EF080239	657
	Carollia perspicillata	JF442123	401		Carollia perspicillata	JF454437	657
	Carollia brevicauda	JF442129	401		Carollia perspicillata	EF080240	657
	Carollia brevicauda	JF442132	1140		Carollia brevicauda	JF447977	657
	Carollia castanea	JF442134	401		Carollia brevicauda	JF447978	657
	Carollia perspicillata	JF442140	401		Carollia brevicauda	EF080209	657
	Carollia castanea	JF442157	706		Carollia perspicillata	EF080242	657
	Carollia perspicillata	JF442187	401		Carollia brevicauda	EF080210	657
	Carollia perspicillata	JX444090	1140		Carollia perspicillata	EF080244	657
	Carollia perspicillata	JX444091	1140		Carollia perspicillata	EF080252	657
	Carollia perspicillata	KC011594	1140		Carollia perspicillata	EF080253	657
	Carollia manu	KC753898	1140		Carollia perspicillata	HQ545546	657
	Carollia benkeithi	KF019702	1140		Carollia brevicauda	JF453765	657
	Carollia benkeithi	KF019703	1140		Carollia brevicauda	JF447379	657
	Carollia benkeithi	KF019704	1140		Carollia brevicauda	JF447570	657
	Carollia benkeithi	KF019705	489		Carollia brevicauda	JF447571	657
	Carollia benkeithi	KF019706	1140		Carollia brevicauda	JF447572	657
	Carollia benkeithi	KF019707	1140		Carollia brevicauda	JF448708	657
	Carollia brevicauda	KF019708	1140		Carollia brevicauda	JF448710	657
	Carollia brevicauda	KF019709	1140		Carollia brevicauda	JF453716	657
	Carollia brevicauda	KF019710	1140		Carollia brevicauda	JF453722	657
	Carollia brevicauda	KF019711	1140		Carollia brevicauda	JF453784	657
	Carollia brevicauda	KF019712	1140		Carollia brevicauda	JF453788	657
	Carollia brevicauda	KF019713	1140		Carollia brevicauda	JF453790	657
	Carollia brevicauda	KF019714	1140		Carollia brevicauda	EU096641	657
	Carollia brevicauda	KF019715	1140		Carollia brevicauda	EU096642	657
	Carollia brevicauda	KF019716	1140		Carollia brevicauda	EU096645	657
	Carollia brevicauda	KF019717	1140		Carollia brevicauda	HQ545476	657
	Carollia brevicauda	KF019718	1140		Carollia brevicauda	JF448718	657
	Carollia perspicillata	KF019720	1140		Carollia brevicauda	JF448719	657
	Carollia perspicillata	KF019721	1076		Carollia perspicillata	HQ545547	657
	Carollia perspicillata	KF019722	1140		Carollia perspicillata	HQ545557	657
	Carollia perspicillata	KF019723	1140		Carollia perspicillata	HQ545561	657
	Carollia sp.	KF019724	373		Carollia perspicillata	HQ545562	657
	Carollia perspicillata	MG704457	1005		Carollia perspicillata	JF454165	657
	Carollia perspicillata	MG704458	1005		Carollia perspicillata	HQ545569	657
	Carollia perspicillata	MG704459	1005		Carollia perspicillata	JF447998	657
	Carollia perspicillata	MG704460	1005		Carollia perspicillata	JF447999	657
	Carollia perspicillata	MG704461	1005		Carollia perspicillata	JF448001	657
	Carollia perspicillata	MG704462	1005		Carollia perspicillata	JF448002	657
	Carollia perspicillata	MG704463	1005		Carollia perspicillata	JF448003	657
	Carollia perspicillata	MG704464	1005		Carollia perspicillata	JF448004	657
	Carollia perspicillata	MG704465	1005		Carollia perspicillata	JF453839	657
	Carollia perspicillata	MG704466	1005		Carollia perspicillata	JF453843	657
	Carollia perspicillata	MG704468	1005		Carollia perspicillata	JF453971	657
	Carollia perspicillata	MG704469	1005		Carollia perspicillata	JF453974	657
	Carollia perspicillata	MG704471	1005		Carollia perspicillata	JF453975	657
	Carollia perspicillata	MG704472	1005		Carollia perspicillata	JF453978	657
	Carollia perspicillata	MG704473	1005		Carollia perspicillata	JF454042	657
	Carollia perspicillata	MG704474	1005		Carollia perspicillata	JF454044	657
	Carollia perspicillata	MG704475	1005		Carollia perspicillata	JF454045	657
	Carollia perspicillata	MG704476	1005		Carollia perspicillata	JF454046	657
	Carollia perspicillata	MG704477	1005		Carollia perspicillata	JF454047	657
	Carollia perspicillata	MG704478	1005		Carollia perspicillata	JF454049	657
	Carollia perspicillata	MG704479	1005		Carollia perspicillata	JF454172	657
	Carollia perspicillata	MG704480	1005		Carollia perspicillata	JF454173	657
	Carollia perspicillata	MG704481	1005		Carollia perspicillata	JF454174	657
	Carollia perspicillata	MG704482	1005		Carollia perspicillata	JF454175	657
	Carollia perspicillata	MG704483	1005		Carollia perspicillata	JF454177	657
	Carollia perspicillata	MG704484	1005		Carollia perspicillata	JF454178	657
	Carollia perspicillata	MG704485	1005		Carollia perspicillata	JF454179	657
	Carollia perspicillata	MG704487	1005		Carollia perspicillata	JF454203	657
	Carollia perspicillata	MG704488	1005		Carollia perspicillata	JF454204	657
	Carollia perspicillata	MG704489	1005		Carollia perspicillata	JF454205	657
	Carollia perspicillata	MG704490	1005		Carollia perspicillata	JF454206	657
	Carollia perspicillata	MG704491	1005		Carollia perspicillata	JF454323	657
	Carollia perspicillata	MG704492	1005		Carollia perspicillata	JF454325	657
	Carollia castanea	MW193556	706		Carollia perspicillata	JF454328	657
	Carollia castanea	MW193557	706		Carollia brevicauda	JF453777	657
	Carollia castanea	MW193559	706		Carollia brevicauda	JF453778	657
	Carollia castanea	MW193560	706		Carollia brevicauda	JF453779	657
	Carollia castanea	MW193561	706		Carollia brevicauda	JF453780	657
	Carollia castanea	MW193563	706		Carollia brevicauda	JF453757	657
	Carollia castanea	MW193566	706		Carollia brevicauda	JF453741	657
	Carollia castanea	MW193567	706		Carollia brevicauda	JF453745	657
	Carollia castanea	MW193568	1140		Carollia brevicauda	JF453746	657
	Carollia perspicillata	MW193569	706		Carollia brevicauda	JF453773	657
	Carollia perspicillata	MW193570	706		Carollia perspicillata	JF454329	657
	Carollia perspicillata	MW193571	706		Carollia perspicillata	JF454350	657
	Carollia sowelli	MW193572	706		Carollia perspicillata	JF454352	657
	Carollia sowelli	MW193573	706		Carollia perspicillata	JF453930	657
	Carollia sowelli	MW193574	706		Carollia perspicillata	JF453933	657
	Carollia sowelli	MW193575	706		Carollia perspicillata	JF453934	657
	Carollia sowelli	MW193576	705		Carollia perspicillata	JF453937	657
	Carollia sowelli	MW193577	706		Carollia perspicillata	JF454074	657
	Carollia sowelli	MW193578	706		Carollia perspicillata	JF454077	657
	Carollia perspicillata	MW208820	706		Carollia perspicillata	JF454080	657
	Carollia perspicillata	MW208821	706		Carollia perspicillata	JF454500	657
	Carollia perspicillata	MW208822	706		Carollia perspicillata	JF446589	657
	Carollia perspicillata	MW208823	706		Carollia perspicillata	JF446591	657
	Carollia castanea	NC_065677	401		Carollia perspicillata	JF447204	657
	Carollia brevicauda	NC_066073	1140		Carollia brevicauda	EF080207	657
					Carollia brevicauda	JF447971	657
					Carollia perspicillata	EF080214	657
					Carollia perspicillata	EF080215	657
					Carollia perspicillata	EF080216	564
					Carollia perspicillata	EF080217	589
					Carollia perspicillata	EF080220	657
					Carollia perspicillata	EF080221	656
					Carollia perspicillata	EF080226	655
					Carollia perspicillata	EF080229	602
					Carollia perspicillata	EF080230	655
					Carollia perspicillata	EF080235	657
					Carollia perspicillata	EF080236	657
					Carollia perspicillata	EF080243	654
					Carollia perspicillata	EF080247	655
					Carollia perspicillata	EF080251	609
					Carollia perspicillata	EF080256	657
					Carollia perspicillata	EF080266	657
					Carollia perspicillata	EF080267	608
					Carollia perspicillata	EF080270	657
					Carollia perspicillata	EF080271	657
					Carollia perspicillata	EF080272	657
					Carollia perspicillata	EF080274	657
					Carollia perspicillata	EF080284	657
					Carollia perspicillata	EU096648	657
					Carollia perspicillata	EU096653	657
					Carollia perspicillata	EU096657	657
					Carollia perspicillata	EU096660	657
					Carollia perspicillata	EU096663	657
					Carollia perspicillata	EU096664	652
					Carollia perspicillata	EU096667	657
					Carollia perspicillata	EU096670	657
					Carollia perspicillata	EU096674	652
					Carollia perspicillata	EU096681	643
					Carollia perspicillata	EU096686	657
					Carollia perspicillata	HG003309	657
					Carollia perspicillata	HQ545483	657
					Carollia perspicillata	HQ545484	657
					Carollia perspicillata	HQ545511	657
					Carollia perspicillata	HQ545519	657
					Carollia perspicillata	HQ545543	657
					Carollia perspicillata	HQ545544	657
					Carollia perspicillata	HQ545628	657
					Carollia perspicillata	HQ545673	657
					Carollia perspicillata	HQ919743	657
					Carollia perspicillata	HQ919765	657
					Carollia perspicillata	HQ919766	657
					Carollia perspicillata	JF446352	657
					Carollia perspicillata	JF446354	657
					Carollia perspicillata	JF446355	657
					Carollia perspicillata	JF446356	657
					Carollia perspicillata	JF446357	657
					Carollia perspicillata	JF446358	657
					Carollia perspicillata	JF446363	655
					Carollia perspicillata	JF446364	657
					Carollia perspicillata	JF446365	657
					Carollia perspicillata	JF446367	656
					Carollia perspicillata	JF446590	656
					Carollia perspicillata	JF447395	657
					Carollia perspicillata	JF447396	657
					Carollia perspicillata	JF447397	657
					Carollia perspicillata	JF447398	657
					Carollia perspicillata	JF447399	657
					Carollia perspicillata	JF447588	657
					Carollia perspicillata	JF447590	657
					Carollia perspicillata	JF447591	657
					Carollia perspicillata	JF447592	621
					Carollia perspicillata	JF447596	657
					Carollia perspicillata	JF447598	601
					Carollia perspicillata	JF447599	657
					Carollia perspicillata	JF447601	657
					Carollia perspicillata	JF447784	657
					Carollia perspicillata	JF447787	657
					Carollia perspicillata	JF447789	657
					Carollia perspicillata	JF447791	657
					Carollia perspicillata	JF447795	657
					Carollia perspicillata	JF447796	657
					Carollia perspicillata	JF447799	657
					Carollia perspicillata	JF447801	657
					Carollia perspicillata	JF447802	657
					Carollia perspicillata	JF448005	657
					Carollia perspicillata	JF448008	657
					Carollia perspicillata	JF448009	657
					Carollia perspicillata	JF448775	656
					Carollia perspicillata	JF448777	657
					Carollia perspicillata	JF448778	653
					Carollia perspicillata	JF448780	657
					Carollia perspicillata	JF448781	649
					Carollia perspicillata	JF448784	657
					Carollia perspicillata	JF448786	657
					Carollia perspicillata	JF448788	657
					Carollia perspicillata	JF448789	657
					Carollia perspicillata	JF448790	657
					Carollia perspicillata	JF448796	657
					Carollia perspicillata	JF448799	655
					Carollia perspicillata	JF448800	657
					Carollia perspicillata	JF448801	657
					Carollia perspicillata	JF448804	657
					Carollia perspicillata	JF453791	657
					Carollia perspicillata	JF453793	657
					Carollia perspicillata	JF453794	657
					Carollia perspicillata	JF453801	657
					Carollia perspicillata	JF453808	657
					Carollia perspicillata	JF453811	657
					Carollia perspicillata	JF453813	657
					Carollia perspicillata	JF453823	657
					Carollia perspicillata	JF453825	657
					Carollia perspicillata	JF453828	656
					Carollia perspicillata	JF453833	657
					Carollia perspicillata	JF453835	657
					Carollia perspicillata	JF453845	657
					Carollia perspicillata	JF453853	657
					Carollia perspicillata	JF453854	657
					Carollia perspicillata	JF453865	657
					Carollia perspicillata	JF453866	657
					Carollia perspicillata	JF453875	657
					Carollia perspicillata	JF453878	657
					Carollia perspicillata	JF453880	644
					Carollia perspicillata	JF453896	657
					Carollia perspicillata	JF453902	657
					Carollia perspicillata	JF453911	643
					Carollia perspicillata	JF453918	657
					Carollia perspicillata	JF453922	657
					Carollia perspicillata	JF453943	649
					Carollia perspicillata	JF453946	641
					Carollia perspicillata	JF453951	657
					Carollia perspicillata	JF453957	657
					Carollia perspicillata	JF453959	657
					Carollia perspicillata	JF453960	657
					Carollia perspicillata	JF453968	657
					Carollia perspicillata	JF453980	657
					Carollia perspicillata	JF453982	657
					Carollia perspicillata	JF453983	657
					Carollia perspicillata	JF453984	657
					Carollia perspicillata	JF453987	657
					Carollia perspicillata	JF453993	657
					Carollia perspicillata	JF453995	657
					Carollia perspicillata	JF453997	657
					Carollia perspicillata	JF454000	657
					Carollia perspicillata	JF454002	647
					Carollia perspicillata	JF454013	641
					Carollia perspicillata	JF454021	657
					Carollia perspicillata	JF454026	657
					Carollia perspicillata	JF454028	657
					Carollia perspicillata	JF454031	657
					Carollia perspicillata	JF454036	657
					Carollia perspicillata	JF454038	657
					Carollia perspicillata	JF454039	657
					Carollia perspicillata	JF454050	657
					Carollia perspicillata	JF454051	657
					Carollia perspicillata	JF454053	657
					Carollia perspicillata	JF454063	657
					Carollia perspicillata	JF454068	657
					Carollia perspicillata	JF454070	657
					Carollia perspicillata	JF454071	657
					Carollia perspicillata	JF454073	657
					Carollia perspicillata	JF454094	657
					Carollia perspicillata	JF454104	657
					Carollia perspicillata	JF454109	657
					Carollia perspicillata	JF454114	657
					Carollia perspicillata	JF454118	657
					Carollia perspicillata	JF454119	657
					Carollia perspicillata	JF454125	657
					Carollia perspicillata	JF454126	647
					Carollia perspicillata	JF454127	657
					Carollia perspicillata	JF454129	657
					Carollia perspicillata	JF454132	657
					Carollia perspicillata	JF454133	657
					Carollia perspicillata	JF454135	657
					Carollia perspicillata	JF454137	657
					Carollia perspicillata	JF454139	657
					Carollia perspicillata	JF454140	657
					Carollia perspicillata	JF454141	657
					Carollia perspicillata	JF454156	657
					Carollia perspicillata	JF454158	657
					Carollia perspicillata	JF454163	657
					Carollia perspicillata	JF454176	656
					Carollia perspicillata	JF454183	657
					Carollia perspicillata	JF454194	657
					Carollia perspicillata	JF454201	657
					Carollia perspicillata	JF454211	647
					Carollia perspicillata	JF454218	635
					Carollia perspicillata	JF454219	657
					Carollia perspicillata	JF454222	657
					Carollia perspicillata	JF454226	655
					Carollia perspicillata	JF454227	657
					Carollia perspicillata	JF454228	657
					Carollia perspicillata	JF454232	657
					Carollia perspicillata	JF454237	657
					Carollia perspicillata	JF454238	657
					Carollia perspicillata	JF454246	654
					Carollia perspicillata	JF454247	657
					Carollia perspicillata	JF454249	657
					Carollia perspicillata	JF454250	657
					Carollia perspicillata	JF454252	657
					Carollia perspicillata	JF454258	654
					Carollia perspicillata	JF454264	657
					Carollia perspicillata	JF454269	657
					Carollia perspicillata	JF454270	657
					Carollia perspicillata	JF454271	657
					Carollia perspicillata	JF454274	643
					Carollia perspicillata	JF454275	657
					Carollia perspicillata	JF454277	657
					Carollia perspicillata	JF454278	656
					Carollia perspicillata	JF454279	657
					Carollia perspicillata	JF454296	657
					Carollia perspicillata	JF454299	643
					Carollia perspicillata	JF454303	653
					Carollia perspicillata	JF454308	646
					Carollia perspicillata	JF454310	657
					Carollia perspicillata	JF454319	642
					Carollia perspicillata	JF454330	657
					Carollia perspicillata	JF454331	657
					Carollia perspicillata	JF454337	657
					Carollia perspicillata	JF454340	657
					Carollia perspicillata	JF454346	657
					Carollia perspicillata	JF454353	653
					Carollia perspicillata	JF454357	657
					Carollia perspicillata	JF454363	657
					Carollia perspicillata	JF454366	657
					Carollia perspicillata	JF454369	657
					Carollia perspicillata	JF454370	657
					Carollia perspicillata	JF454373	657
					Carollia perspicillata	JF454376	650
					Carollia perspicillata	JF454377	657
					Carollia perspicillata	JF454378	657
					Carollia perspicillata	JF454380	657
					Carollia perspicillata	JF454384	657
					Carollia perspicillata	JF454398	657
					Carollia perspicillata	JF454402	657
					Carollia perspicillata	JF454407	657
					Carollia perspicillata	JF454410	657
					Carollia perspicillata	JF454412	657
					Carollia perspicillata	JF454419	657
					Carollia perspicillata	JF454425	657
					Carollia perspicillata	JF454440	657
					Carollia perspicillata	JF454441	657
					Carollia perspicillata	JF454444	657
					Carollia perspicillata	JF454457	657
					Carollia perspicillata	JF454461	657
					Carollia perspicillata	JF454472	657
					Carollia perspicillata	JF454474	657
					Carollia perspicillata	JF454475	657
					Carollia perspicillata	JF454477	657
					Carollia perspicillata	JF454482	657
					Carollia perspicillata	JF454485	655
					Carollia perspicillata	JF454486	657
					Carollia perspicillata	JF454493	657
					Carollia perspicillata	JF454497	657
					Carollia perspicillata	JF454509	657
					Carollia perspicillata	JF454510	578
					Carollia perspicillata	JF454512	657
					Carollia perspicillata	JF454514	657
					Carollia perspicillata	JF454517	657
					Carollia perspicillata	JF454519	657
					Carollia perspicillata	JF454521	657
					Carollia perspicillata	JF454523	657
					Carollia perspicillata	JF454525	657
					Carollia perspicillata	JF454526	657
					Carollia perspicillata	JF454529	655
					Carollia perspicillata	JF454530	657
					Carollia perspicillata	JF454534	657
					Carollia perspicillata	JF454535	657
					Carollia perspicillata	JF459106	657
					Carollia perspicillata	JF459109	515
					Carollia perspicillata	JF459110	562
					Carollia perspicillata	JF459112	635
					Carollia perspicillata	JF459113	585
					Carollia perspicillata	JF459116	580
					Carollia perspicillata	JF459381	657
					Carollia perspicillata	JF498957	657
					Carollia perspicillata	JF498958	657
					Carollia perspicillata	JQ601236	657
					Carollia perspicillata	JQ601363	554
					Carollia perspicillata	JQ601395	657
					Carollia perspicillata	JQ601406	657
					Carollia perspicillata	KC011682	657
					Carollia perspicillata	KU295472	579
					Carollia perspicillata	KX755890	202
					Carollia perspicillata	KX755891	202
					Carollia perspicillata	MG191789	620
					Carollia perspicillata	MG191792	625
					Carollia perspicillata	MG191797	633
					Carollia perspicillata	MG191822	639
					Carollia perspicillata	MG191825	657
					Carollia perspicillata	MG191841	640
					Carollia perspicillata	MG191853	637
					Carollia perspicillata	MG191898	638
					Carollia perspicillata	MG191908	623
					Carollia perspicillata	MG191919	657
					Carollia perspicillata	MG191921	551
					Carollia perspicillata	MG704378	508
					Carollia perspicillata	MG704381	508
					Carollia perspicillata	MG704384	508
					Carollia perspicillata	MG704386	508
					Carollia perspicillata	MG704387	508
					Carollia perspicillata	MG704391	508
					Carollia perspicillata	MG704392	508
					Carollia perspicillata	MG704393	508
					Carollia perspicillata	MG704394	508
					Carollia perspicillata	MG704395	508
					Carollia perspicillata	MG704397	508
					Carollia perspicillata	MG704400	508
					Carollia perspicillata	MG704402	508
					Carollia perspicillata	MG704409	508
					Carollia perspicillata	MG704411	508
					Carollia perspicillata	MG704412	508
					Carollia perspicillata	MG704413	508
					Carollia perspicillata	MG704416	508
					Carollia perspicillata	MG704417	508
					Carollia perspicillata	MG704418	508
					Carollia perspicillata	MG704419	508
					Carollia perspicillata	MG704421	508
					Carollia perspicillata	MG704423	508
					Carollia perspicillata	MG704424	508
					Carollia perspicillata	MG704429	508
					Carollia perspicillata	MG704430	508
					Carollia perspicillata	MG704431	508
					Carollia perspicillata	MG704432	508
					Carollia perspicillata	MG704434	508
					Carollia perspicillata	MG704438	508
					Carollia perspicillata	MG704440	508
					Carollia perspicillata	MG704442	508
					Carollia perspicillata	MG704445	508
					Carollia perspicillata	MG704446	508
					Carollia perspicillata	MG704447	508
					Carollia perspicillata	MG704448	508
					Carollia perspicillata	MG704450	508
					Carollia perspicillata	MG704451	508
					Carollia perspicillata	MG704452	508
					Carollia perspicillata	MG704453	508
					Carollia perspicillata	MG704456	508
					Carollia perspicillata	MK749504	657
					Carollia perspicillata	MK749505	657
					Carollia perspicillata	MK749507	657
					Carollia perspicillata	MW327596	552
					Carollia perspicillata	MW327598	552
					Carollia perspicillata	MW327599	552
					Carollia perspicillata	MW327603	552
					Carollia perspicillata	MW327604	552
					Carollia perspicillata	MW327605	552
					Carollia perspicillata	MW327606	552
					Carollia perspicillata	MW327608	552
					Carollia perspicillata	MW327609	552
					Carollia perspicillata	MW327612	552
					Carollia perspicillata	MW327613	552
					Carollia perspicillata	MW327614	552
					Carollia perspicillata	MW327617	552
					Carollia perspicillata	MW327620	552
					Carollia perspicillata	MW327621	552
					Carollia perspicillata	OM962991	657
					Carollia perspicillata	OM964560	657
					Carollia perspicillata	OM964561	657
					Carollia perspicillata	OM964595	657
					Carollia perspicillata	OM964646	657
					Carollia perspicillata	OM967466	657
					Carollia perspicillata	OM967468	657
					Carollia perspicillata	OM967472	657
					Carollia perspicillata	OM967476	657
					Carollia perspicillata	OM967477	657
					Carollia perspicillata	OM967483	657
					Carollia sowelli	HQ625004	390
					Carollia sowelli	JF446581	657
					Carollia sowelli	JF446582	657
					Carollia sowelli	JF446583	657
					Carollia sowelli	JF446731	657
					Carollia sowelli	JF446732	657
					Carollia sowelli	JF446734	657
					Carollia sowelli	JF446735	657
					Carollia sowelli	JF446737	657
					Carollia sowelli	JF446743	639
					Carollia sowelli	JF446744	657
					Carollia sowelli	JF446751	657
					Carollia sowelli	JF446752	657
					Carollia sowelli	JF446754	657
					Carollia sowelli	JF446755	633
					Carollia sowelli	JF447198	657
					Carollia sowelli	JF447372	657
					Carollia sowelli	JF447373	620
					Carollia sowelli	JF447376	657
					Carollia sowelli	JF447378	657
					Carollia sowelli	JF447985	657
					Carollia sowelli	JF498963	657
					Carollia sowelli	JF498965	657
					Carollia sowelli	JF498973	657
					Carollia sowelli	JF498976	657
					Carollia sowelli	JF498981	657
					Carollia sowelli	JF498984	657
					Carollia sowelli	JF498988	657
					Carollia sowelli	JF498997	657
					Carollia sowelli	JF499005	657
					Carollia subrufa	JF446484	657
					Carollia subrufa	JF446487	657
					Carollia subrufa	JF446769	657
					Carollia subrufa	JF447212	657
					Carollia subrufa	JF448011	657
					Carollia subrufa	JF448014	657
					Carollia subrufa	JF448015	657
					Carollia subrufa	JF459385	657
					Carollia subrufa	KX755893	202
					Rhinophylla pumilio	HG003313	657

## Sheet: Handleyomys
	Cytb				COI
	scientific name	Genbank Accession	Length (bp)		scientific name	Genbank Accession	Length (bp)
	Handleyomys alfaroi	KP778255	801		Handleyomys alfaroi	EU095460	657
	Euryoryzomys sp.	KP778362	1143		Handleyomys alfaroi	JF444376	657
	Handleyomys alfaroi	DQ224409	1143		Handleyomys alfaroi	JF459482	657
	Handleyomys alfaroi	EU579488	1143		Handleyomys alfaroi	JF459483	657
	Handleyomys alfaroi	EU579489	1143		Handleyomys alfaroi	JF491768	657
	Handleyomys alfaroi	GU126533	1106		Handleyomys alfaroi	JF491770	657
	Handleyomys alfaroi	KF658400	1143		Handleyomys alfaroi	JF491771	657
	Handleyomys alfaroi	KP778435	1143		Handleyomys alfaroi	JF491775	657
	Handleyomys alfaroi	KP778263	1143		Handleyomys alfaroi	JF491777	637
	Handleyomys alfaroi	KP778466	801		Handleyomys alfaroi	JF491778	657
	Handleyomys alfaroi	KP778371	801		Handleyomys alfaroi	JF491784	657
	Handleyomys alfaroi	KP778381	1143		Handleyomys alfaroi	JF491785	657
	Handleyomys alfaroi	KP778407	801		Handleyomys alfaroi	JF491786	657
	Handleyomys alfaroi	KP778355	801		Handleyomys alfaroi	JF491792	657
	Handleyomys alfaroi	KP778356	1143		Handleyomys alfaroi	JF491794	657
	Handleyomys alfaroi	KP778360	801		Handleyomys alfaroi	JF491799	657
	Handleyomys alfaroi	KP778341	1143		Handleyomys alfaroi	JF491800	657
	Handleyomys alfaroi	KP778347	1143		Handleyomys alfaroi	JF491804	657
	Handleyomys alfaroi	KP778315	1143		Handleyomys alfaroi	JF491809	657
	Handleyomys alfaroi	KP778323	1143		Handleyomys alfaroi	JF491810	657
	Handleyomys alfaroi	KP778329	1143		Handleyomys alfaroi	JF491812	657
	Handleyomys alfaroi	KP778335	801		Handleyomys alfaroi	JF491816	657
	Handleyomys alfaroi	KP778268	1143		Handleyomys alfaroi	JF491817	657
	Handleyomys alfaroi	KP778294	1143		Handleyomys alfaroi	JF491818	657
	Handleyomys alfaroi	KP778295	801		Handleyomys alfaroi	JF491819	657
	Handleyomys alfaroi	KP778299	801		Handleyomys alfaroi	JF491824	657
	Handleyomys alfaroi	KF658401	1143		Handleyomys alfaroi	MZ364400	657
	Handleyomys alfaroi	KP778231	801		Handleyomys alfaroi	MZ364401	657
	Handleyomys alfaroi	KP778238	1143		Handleyomys alfaroi	MZ364402	657
	Handleyomys chapmani	KF658374	1143		Handleyomys melanotis	EU095467	657
	Handleyomys chapmani	KF658375	1143		Handleyomys melanotis	JF492154	657
	Handleyomys chapmani	KF658376	1143		Handleyomys melanotis	JF492159	657
	Handleyomys chapmani	KF658377	1143		Handleyomys melanotis	JF492160	657
	Handleyomys chapmani	KF658378	1143		Handleyomys melanotis	JF492165	657
	Handleyomys chapmani	KF658379	1143		Handleyomys melanotis	JF492167	657
	Handleyomys chapmani	KF658380	1143		Handleyomys melanotis	JF492169	657
	Handleyomys chapmani	KP778225	1143		Handleyomys melanotis	JF492170	652
	Handleyomys chapmani	KF658381	1143		Handleyomys melanotis	JF492175	657
	Handleyomys chapmani	KF658382	1143		Handleyomys melanotis	JF492180	657
	Handleyomys chapmani	KF658360	1143		Handleyomys melanotis	JF492185	656
	Handleyomys fuscatus	KP778358	801		Handleyomys melanotis	JF492198	657
	Handleyomys alfaroi	KY753996	1003		Handleyomys melanotis	JF492207	657
	Handleyomys chapmani	KF658343	1143		Handleyomys melanotis	JF492208	657
	Handleyomys chapmani	KF658347	1143		Handleyomys melanotis	JF492209	657
	Handleyomys chapmani	KF658348	1143		Handleyomys melanotis	JF492211	657
	Handleyomys chapmani	KF658349	1143		Handleyomys melanotis	JF492212	657
	Handleyomys chapmani	KF658352	1143		Handleyomys melanotis	JF492213	657
	Handleyomys chapmani	KF658354	1143		Handleyomys melanotis	JF492215	657
	Handleyomys chapmani	KF658355	1143		Handleyomys melanotis	JF492216	657
	Handleyomys chapmani	KF658356	1143		Handleyomys melanotis	JF492217	657
	Handleyomys chapmani	KF658357	1143		Handleyomys melanotis	JF492218	657
	Handleyomys chapmani	KF658358	1143		Handleyomys melanotis	JF492221	657
	Handleyomys chapmani	KF658359	1143		Handleyomys melanotis	JF492222	657
	Handleyomys chapmani	KP778233	801		Handleyomys melanotis	JF492223	657
	Handleyomys chapmani	KP778259	1143		Handleyomys melanotis	JF492224	657
	Handleyomys chapmani	KP778274	1143		Handleyomys melanotis	JF492226	657
	Handleyomys chapmani	KP778318	1143		Handleyomys melanotis	JF492230	657
	Handleyomys chapmani	KF658370	1143		Handleyomys melanotis	JF492233	657
	Handleyomys chapmani	KF658371	1143		Handleyomys melanotis	JF492236	657
	Handleyomys chapmani	KF658353	1143		Handleyomys melanotis	JF492242	654
	Handleyomys chapmani	KF658362	1143		Handleyomys melanotis	JF492244	657
	Handleyomys chapmani	KF658363	1143		Handleyomys melanotis	JF492247	657
	Handleyomys chapmani	KF658365	1143		Handleyomys melanotis	JF492248	657
	Handleyomys chapmani	KF658366	1143		Handleyomys melanotis	JF492250	657
	Handleyomys chapmani	KF658369	1143		Handleyomys melanotis	JF492252	626
	Handleyomys chapmani	KF658367	1143		Handleyomys melanotis	JF492254	657
	Handleyomys chapmani	KF658361	1143		Handleyomys melanotis	JF492258	656
	Handleyomys chapmani	KF658372	1143		Handleyomys melanotis	JF492266	657
	Handleyomys chapmani	KF658373	1143		Handleyomys melanotis	JN312345	657
	Handleyomys chapmani	KP778391	1143		Handleyomys melanotis	JQ600268	657
	Handleyomys chapmani	KP778410	1143		Handleyomys melanotis	JQ600269	657
	Handleyomys fuscatus	KP778247	1143		Handleyomys melanotis	JQ600315	657
	Handleyomys fuscatus	KP778281	801		Handleyomys melanotis	JQ600316	657
	Handleyomys guerrerensis	KF658387	1143		Transandinomys talamancae	JF492271	657
	Handleyomys guerrerensis	KF658389	1143
	Handleyomys guerrerensis	KF658390	1143
	Handleyomys guerrerensis	KF658391	1143
	Handleyomys guerrerensis	KF658392	1143
	Handleyomys guerrerensis	KF658394	1143
	Handleyomys guerrerensis	KF658395	1143
	Handleyomys guerrerensis	KF658396	1143
	Handleyomys guerrerensis	KF658397	1143
	Handleyomys guerrerensis	KF658398	1143
	Handleyomys guerrerensis	KF658399	1143
	Handleyomys guerrerensis	KP778218	1143
	Handleyomys guerrerensis	KP778221	1143
	Handleyomys guerrerensis	KP778240	1143
	Handleyomys guerrerensis	KP778291	1143
	Handleyomys intectus	EU579490	1143
	Handleyomys intectus	KP778278	823
	Handleyomys intectus	KP778290	823
	Handleyomys melanotis	KF658408	1143
	Handleyomys melanotis	KF658410	1143
	Handleyomys melanotis	KF658411	1143
	Handleyomys melanotis	KF658414	1143
	Handleyomys melanotis	KP778293	1143
	Handleyomys melanotis	KP778337	801
	Handleyomys melanotis	KP778363	801
	Handleyomys melanotis	KP778373	1143
	Handleyomys melanotis	KP778389	1143
	Handleyomys melanotis	KP778420	801
	Handleyomys melanotis	KP778443	825
	Handleyomys melanotis	KP778462	1143
	Handleyomys rhabdops	KP778245	824
	Handleyomys rhabdops	KP778253	1143
	Handleyomys rhabdops	KP778306	1143
	Handleyomys rhabdops	KP778408	1143
	Handleyomys rhabdops	KP778446	1143
	Handleyomys rostratus	EU579491	1143
	Handleyomys rostratus	EU579492	1143
	Handleyomys rostratus	EU579493	1143
	Handleyomys rostratus	GU126541	1111
	Handleyomys rostratus	KF658402	1143
	Handleyomys rostratus	KF658404	1143
	Handleyomys rostratus	KF658405	1143
	Handleyomys rostratus	KF658406	1143
	Handleyomys rostratus	KF658407	1143
	Handleyomys rostratus	KP778207	1143
	Handleyomys rostratus	KP778211	1143
	Handleyomys rostratus	KP778222	1143
	Handleyomys rostratus	KP778227	1143
	Handleyomys rostratus	KP778232	1143
	Handleyomys rostratus	KP778236	1143
	Handleyomys rostratus	KP778237	1143
	Handleyomys rostratus	KP778244	1143
	Handleyomys rostratus	KP778246	1143
	Handleyomys rostratus	KP778248	1143
	Handleyomys rostratus	KP778252	1143
	Handleyomys rostratus	KP778254	1143
	Handleyomys rostratus	KP778257	1143
	Handleyomys rostratus	KP778262	1143
	Handleyomys rostratus	KP778264	1143
	Handleyomys rostratus	KP778266	1143
	Handleyomys rostratus	KP778276	801
	Handleyomys rostratus	KP778282	801
	Handleyomys rostratus	KP778303	1143
	Handleyomys rostratus	KP778304	801
	Handleyomys rostratus	KP778305	1143
	Handleyomys rostratus	KP778308	1143
	Handleyomys rostratus	KP778310	801
	Handleyomys rostratus	KP778312	1143
	Handleyomys rostratus	KP778314	1143
	Handleyomys rostratus	KP778316	1143
	Handleyomys rostratus	KP778319	1143
	Handleyomys rostratus	KP778321	1143
	Handleyomys rostratus	KP778325	801
	Handleyomys rostratus	KP778334	1143
	Handleyomys rostratus	KP778336	801
	Handleyomys rostratus	KP778345	1143
	Handleyomys rostratus	KP778346	1143
	Handleyomys rostratus	KP778350	1143
	Handleyomys rostratus	KP778354	1143
	Handleyomys rostratus	KP778361	1143
	Handleyomys rostratus	KP778366	1143
	Handleyomys rostratus	KP778384	1143
	Handleyomys rostratus	KP778385	1143
	Handleyomys rostratus	KP778393	801
	Handleyomys rostratus	KP778397	1143
	Handleyomys rostratus	KP778416	1143
	Handleyomys rostratus	KP778424	801
	Handleyomys rostratus	KP778426	1143
	Handleyomys rostratus	KP778427	1143
	Handleyomys rostratus	KP778428	801
	Handleyomys rostratus	KP778429	801
	Handleyomys rostratus	KP778432	1143
	Handleyomys rostratus	KP778433	801
	Handleyomys rostratus	KP778439	1143
	Handleyomys rostratus	KP778440	1143
	Handleyomys saturatior	KF658386	1143
	Handleyomys saturatior	KP778201	1143
	Handleyomys saturatior	KP778204	1143
	Handleyomys saturatior	KP778230	1143
	Handleyomys saturatior	KP778260	1143
	Handleyomys saturatior	KP778301	1143
	Handleyomys saturatior	KP778313	1143
	Handleyomys saturatior	KP778324	1143
	Handleyomys saturatior	KP778331	1143
	Handleyomys saturatior	KP778353	801
	Handleyomys saturatior	KP778357	1143
	Handleyomys saturatior	KP778370	1143
	Handleyomys saturatior	KP778414	1143
	Handleyomys saturatior	KP778436	801
	Handleyomys saturatior	KP778442	1143
	Hylaeamys megacephalus	KP778220	1143
	Hylaeamys megacephalus	KP778270	1143
	Hylaeamys megacephalus	KP778271	801
	Hylaeamys megacephalus	KP778286	1143
	Hylaeamys megacephalus	KP778296	1143
	Hylaeamys megacephalus	KP778298	1143
	Hylaeamys megacephalus	KP778322	1143
	Hylaeamys megacephalus	KP778339	1143
	Hylaeamys megacephalus	KP778377	1143
	Hylaeamys megacephalus	KP778382	1143
	Hylaeamys megacephalus	KP778418	1143
	Hylaeamys megacephalus	KP778438	1143
	Hylaeamys megacephalus	KP778447	1143
	Hylaeamys yunganus	KP778239	1143
	Hylaeamys yunganus	KP778369	1143
	Nephelomys albigularis	KP778226	1143
	Nephelomys albigularis	KP778383	1143
	Nephelomys albigularis	KP778415	801
	Nephelomys devius	KP778209	1143
	Nephelomys devius	KP778258	801
	Nephelomys devius	KP778272	801
	Nephelomys devius	KP778411	1143
	Oecomys auyantepui	KP778200	801
	Oecomys auyantepui	KP778302	801
	Oecomys auyantepui	KP778332	801
	Oecomys rutilus	KP778344	801
	Transandinomys talamancae	KP778208	1143
	Transandinomys talamancae	KP778202	1143
	Transandinomys talamancae	KP778208	1143
	Transandinomys talamancae	KP778280	801

## Sheet: Hiostiotus
	Cytb				COI
	scientific name	Genbank Accession	Length (bp)		scientific name	Genbank Accession	Length (bp)
	Histiotus macrotus	MK429695	1137		Histiotus macrotus	NC_070015	657
	Histiotus macrotus	MK429697	1137		Histiotus macrotus	OP345299	657
	Histiotus macrotus	MK429698	1137		Histiotus macrotus	OP345300	657
	Histiotus macrotus	MK429700	1137		Histiotus macrotus	OP345304	657
	Histiotus magellanicus	MK429706	1137		Histiotus macrotus	OP345311	657
	Eptesicus chiriquinus	MT113468	847		Histiotus macrotus	OP345315	657
	Eptesicus furinalis	MT113460	268		Histiotus macrotus	OP345331	657
	Eptesicus fuscus	MT113461	941		Histiotus macrotus	OP345334	657
	Histiotus humboldti	MT113467	980		Histiotus macrotus	OP345335	657
	Histiotus humboldti	MT113463	974		Histiotus macrotus	OP345336	657
	Histiotus humboldti	MT113465	974		Histiotus macrotus	OP345339	657
	Histiotus humboldti	MT113462	899		Histiotus macrotus	OP345340	657
	Histiotus magellanicus	MK429707	1137		Histiotus magellanicus	NC_070017	657
	Histiotus montanus	MK429696	1137		Histiotus magellanicus	OP345309	657
	Histiotus montanus	MK429699	1137		Histiotus magellanicus	OP345310	657
	Histiotus montanus	MK429701	1137		Histiotus magellanicus	OP345318	657
	Histiotus montanus	MK429702	974		Histiotus magellanicus	OP345319	657
	Histiotus montanus	MK429703	904		Histiotus magellanicus	OP345320	657
	Lasiurus blossevillii	KP341705	1137		Histiotus magellanicus	OP345321	657
	Histiotus magellanicus	MK429708	1137		Histiotus magellanicus	OP345323	657
	Histiotus magellanicus	MK429709	1137		Histiotus magellanicus	OP345324	657
	Histiotus magellanicus	MK429710	1137		Histiotus magellanicus	OP345325	657
	Histiotus montanus	MT113466	1137		Histiotus magellanicus	OP345327	657
	Histiotus montanus	MT113464	1137		Histiotus magellanicus	OP345329	657
					Histiotus montanus	NC_070016	657
					Histiotus montanus	OP345302	657
					Histiotus montanus	OP345305	657
					Histiotus montanus	OP345306	657
					Histiotus montanus	OP345307	657
					Histiotus montanus	OP345313	657
					Histiotus montanus	OP345316	657
					Histiotus montanus	OP345317	657
					Histiotus montanus	OP345330	657
					Histiotus montanus	OP345332	657
					Histiotus montanus	OP345333	657
					Histiotus montanus	OP345337	657
					Histiotus montanus	OP345338	657
					Lasiurus blossevillii	JF448048	657

## Sheet: Marmosa
	Cytb				COI
	scientific name	Genbank Accession	Length (bp)		scientific name	Genbank Accession	Length (bp)
	Didelphis albiventris	AJ487004	820		Didelphis marsupialis	NC_057518	657
	Marmosa alstoni	MN978600	1146		Marmosa demerarae	EU095437	657
	Marmosa andersoni	KM819039	810		Marmosa demerarae	EU597274	474
	Marmosa andersoni	KM819040	810		Marmosa demerarae	EU597276	642
	Marmosa budini	MK496187	777		Marmosa demerarae	EU597279	642
	Marmosa constantiae	MK496184	783		Marmosa demerarae	GU112827	657
	Marmosa constantiae	MK496186	747		Marmosa demerarae	GU112828	657
	Marmosa constantiae	MK496188	775		Marmosa demerarae	GU112829	657
	Marmosa constantiae	MK496192	795		Marmosa demerarae	GU112830	657
	Marmosa constantiae	MN978620	1146		Marmosa demerarae	JF457813	657
	Marmosa constantiae	MN992047	1146		Marmosa demerarae	JF457816	657
	Marmosa demerarae	AJ487005	820		Marmosa demerarae	JF457819	657
	Marmosa demerarae	AJ487006	820		Marmosa demerarae	JF457820	657
	Marmosa demerarae	AJ606434	800		Marmosa demerarae	JF457824	657
	Marmosa alstoni	JN887133	630		Marmosa lepida	EU095427	657
	Marmosa alstoni	MN978597	275		Marmosa mexicana	EU095428	468
	Marmosa alstoni	MN978599	372		Marmosa mexicana	EU095430	657
	Marmosa constantiae	MK496213	791		Marmosa mexicana	JF457772	657
	Marmosa constantiae	MN978605	475		Marmosa mexicana	JF457773	657
	Marmosa constantiae	MN978606	1146		Marmosa mexicana	JF457774	639
	Marmosa constantiae	MN978607	1146		Marmosa mexicana	JF457775	657
	Marmosa constantiae	MN978608	1146		Marmosa mexicana	JF457777	657
	Marmosa constantiae	MN978609	1146		Marmosa mexicana	JF457780	657
	Marmosa constantiae	MN978610	1146		Marmosa mexicana	JF457782	647
	Marmosa constantiae	MN978611	372		Marmosa mexicana	JF457786	656
	Marmosa constantiae	MN978612	475		Marmosa mexicana	JF457788	657
	Marmosa constantiae	MN978613	1146		Marmosa mexicana	JF457789	657
	Marmosa demerarae	AJ606436	800		Marmosa mexicana	JQ599986	657
	Marmosa demerarae	AJ606437	800		Marmosa mexicana	JQ599987	657
	Marmosa alstoni	MN978602	475		Marmosa murina	EU096774	657
	Marmosa alstoni	MN978603	475		Marmosa murina	EU096775	657
	Marmosa constantiae	JF281084	801		Marmosa murina	GU112805	657
	Marmosa constantiae	JF281085	801		Marmosa murina	GU112806	657
	Marmosa constantiae	JF281086	801		Marmosa murina	GU112807	657
	Marmosa constantiae	JF281093	630		Marmosa murina	GU112809	657
	Marmosa constantiae	MK496179	558		Marmosa murina	GU112810	657
	Marmosa constantiae	MK496182	659		Marmosa murina	GU112811	657
	Marmosa constantiae	MN978614	475		Marmosa murina	JF457790	657
	Marmosa constantiae	MN978615	475		Marmosa murina	JF457792	657
	Marmosa constantiae	MN978616	1146		Marmosa murina	JF457793	657
	Marmosa demerarae	AJ606439	659		Marmosa murina	KT236204	524
	Marmosa alstoni	MN978598	978		Marmosa murina waterhousei	EU095429	657
	Marmosa constantiae	MK496207	515		Marmosa murina waterhousei	JF444317	657
	Marmosa constantiae	MN978617	1146		Marmosa murina waterhousei	JF457800	657
	Marmosa constantiae	MN978619	1146		Marmosa murina waterhousei	JF457801	657
	Marmosa constantiae	HM106368	1146		Marmosa paraguayana	EU597283	642
	Marmosa constantiae	HM106369	1146		Marmosa paraguayana	EU597284	642
	Marmosa constantiae	MK496193	800		Marmosa paraguayana	GU112831	657
	Marmosa constantiae	MK496195	790		Marmosa paraguayana	GU112832	657
	Marmosa constantiae	MK496196	792		Marmosa paraguayana	GU112833	657
	Marmosa constantiae	MK496197	795		Marmosa paraguayana	GU112834	657
	Marmosa constantiae	MK496199	797		Marmosa paraguayana	GU112835	657
	Marmosa constantiae	MK496200	801		Marmosa paraguayana	GU112836	657
	Marmosa constantiae	MK496201	801		Marmosa paraguayana	GU112837	657
	Marmosa constantiae	MK496203	522		Marmosa paraguayana	GU112838	657
	Marmosa constantiae	MK496205	522		Marmosa paraguayana	GU112839	657
	Marmosa constantiae	MK496206	515		Marmosa paraguayana	GU112840	657
	Marmosa demerarae	AJ606438	787		Marmosa paraguayana	KJ013084	657
	Marmosa alstoni	MN978604	275		Marmosa regina	EU597272	642
	Marmosa constantiae	MK496208	728		Marmosa regina	JF444329	657
	Marmosa constantiae	MK496209	593		Marmosa regina	JF444330	657
	Marmosa demerarae	AJ606435	800		Marmosa regina	JF457826	657
	Didelphis marsupialis	NC_057518	1146		Marmosops invictus	EU095426	657
	Marmosa demerarae	AJ606440	800
	Marmosa demerarae	AJ606441	800
	Marmosa demerarae	AJ606444	800
	Marmosa demerarae	AJ606446	800
	Marmosa demerarae	EF154230	1119
	Marmosa demerarae	EF587290	803
	Marmosa demerarae	EF587291	803
	Marmosa demerarae	EF587295	803
	Marmosa demerarae	EF587296	803
	Marmosa demerarae	EF587297	803
	Marmosa demerarae	EF587298	803
	Marmosa demerarae	EF587299	803
	Marmosa demerarae	EF587300	803
	Marmosa demerarae	EF587309	802
	Marmosa demerarae	GU112916	801
	Marmosa demerarae	GU112917	801
	Marmosa demerarae	HM106374	1146
	Marmosa demerarae	HM106375	1146
	Marmosa demerarae	JF281070	801
	Marmosa demerarae	JF281071	801
	Marmosa demerarae	JF281072	801
	Marmosa demerarae	JF281073	801
	Marmosa demerarae	JF281075	801
	Marmosa demerarae	JF281076	801
	Marmosa demerarae	JF281077	801
	Marmosa demerarae	JF281078	801
	Marmosa demerarae	JF281079	801
	Marmosa demerarae	JF281081	801
	Marmosa demerarae	JF281082	801
	Marmosa demerarae	JF281083	801
	Marmosa demerarae	JF281087	801
	Marmosa demerarae	JF281088	801
	Marmosa demerarae	JF281089	801
	Marmosa demerarae	JF281090	801
	Marmosa demerarae	JF281091	801
	Marmosa demerarae	JF281092	801
	Marmosa demerarae	KJ868124	1146
	Marmosa demerarae	MG824940	771
	Marmosa demerarae	MK496180	698
	Marmosa demerarae	MK496181	695
	Marmosa demerarae	MK496183	776
	Marmosa demerarae	MK496191	797
	Marmosa demerarae	MN978621	1146
	Marmosa demerarae	MN978622	1146
	Marmosa demerarae	MN978623	1146
	Marmosa demerarae	MN978624	1146
	Marmosa demerarae	MN978625	1146
	Marmosa demerarae	MN978626	726
	Marmosa demerarae	U34673	1146
	Marmosa demerarae	U34674	1146
	Marmosa germana	MN978627	1146
	Marmosa germana	MN978628	1146
	Marmosa germana	MN978629	1146
	Marmosa germana	MN978630	1146
	Marmosa germana	MN978632	1146
	Marmosa lepida	HM106376	1146
	Marmosa lepida	HM106377	1146
	Marmosa lepida	MF973048	800
	Marmosa lepida	MG586948	800
	Marmosa lepida	MG586950	800
	Marmosa lepida	U34668	1146
	Marmosa limae	MN978633	1146
	Marmosa limae	MN978634	1146
	Marmosa limae	MN978635	1146
	Marmosa limae	MN978637	498
	Marmosa limae	MN978638	1146
	Marmosa meridae	MN978640	1146
	Marmosa meridae	MN978642	1146
	Marmosa mexicana	AJ606454	800
	Marmosa mexicana	HM106345	1087
	Marmosa mexicana	HM106346	1146
	Marmosa mexicana	HM106355	1146
	Marmosa mexicana	HM106356	1146
	Marmosa mexicana	HM106357	1146
	Marmosa mexicana	HM106358	1145
	Marmosa mexicana	HM106359	1146
	Marmosa mexicana	MG029659	1146
	Marmosa mexicana	HM106361	402
	Marmosa murina	AJ486978	820
	Marmosa murina	AJ486979	820
	Marmosa murina	AJ486982	820
	Marmosa murina	AJ486983	820
	Marmosa murina	AJ486984	820
	Marmosa murina	AJ486985	820
	Marmosa murina	AJ486987	820
	Marmosa murina	AJ486989	820
	Marmosa murina	AJ486990	820
	Marmosa murina	AJ486991	820
	Marmosa murina	AJ486992	820
	Marmosa murina	AJ486993	820
	Marmosa murina	AJ486996	820
	Marmosa murina	AJ486998	820
	Marmosa murina	AJ487001	820
	Marmosa murina	AJ487002	820
	Marmosa murina	AJ487003	797
	Marmosa murina	AJ606448	800
	Marmosa murina	AJ606449	800
	Marmosa murina	AJ606450	800
	Marmosa murina	AJ606451	770
	Marmosa murina	EF154231	756
	Marmosa murina	GU112893	793
	Marmosa murina	GU112894	801
	Marmosa murina	GU112895	740
	Marmosa murina	GU112896	801
	Marmosa murina	GU112897	801
	Marmosa murina	GU112898	801
	Marmosa murina	HM106388	1146
	Marmosa murina	HM106389	1146
	Marmosa murina	HM106391	1146
	Marmosa murina	HM106392	1146
	Marmosa murina	HM106393	1092
	Marmosa murina	HM106395	1146
	Marmosa murina	HQ622146	792
	Marmosa murina	JF281044	801
	Marmosa murina	JF281045	801
	Marmosa murina	JF281046	801
	Marmosa murina	JF281047	801
	Marmosa murina	JF281049	801
	Marmosa murina	JF281050	801
	Marmosa murina	JF281051	801
	Marmosa murina	JF281052	801
	Marmosa murina	JF281053	801
	Marmosa murina	JF281054	801
	Marmosa murina	JF281055	801
	Marmosa murina	JF281056	801
	Marmosa murina	JF281059	801
	Marmosa murina	JF281060	801
	Marmosa murina	JF281061	801
	Marmosa murina	JF281062	801
	Marmosa murina	JF281063	801
	Marmosa murina	JF281064	801
	Marmosa murina	JF281066	801
	Marmosa murina	JF281067	801
	Marmosa murina	KF313985	1146
	Marmosa murina	KF619568	1146
	Marmosa murina	KF619569	1146
	Marmosa murina	KF619570	1146
	Marmosa murina	KF619571	1146
	Marmosa murina	KF619572	1146
	Marmosa murina	KF619573	1146
	Marmosa murina	KF619575	1146
	Marmosa murina	KF619576	1146
	Marmosa murina	KF619577	1146
	Marmosa murina	KF619578	1146
	Marmosa murina	KF619579	1146
	Marmosa murina	KJ868123	1146
	Marmosa murina	KM819042	1140
	Marmosa murina	KM819047	1137
	Marmosa murina	KT437773	1146
	Marmosa murina	HM106397	1146
	Marmosa murina	HM106398	1146
	Marmosa murina	HM106399	1146
	Marmosa murina	HM106400	1087
	Marmosa murina	HM106401	1146
	Marmosa murina	HM106381	726
	Marmosa murina	HM106382	1146
	Marmosa murina	HM106383	1146
	Marmosa murina	HM106385	1146
	Marmosa murina	JF281043	583
	Marmosa murina	MG824942	801
	Marmosa murina	MG824943	801
	Marmosa paraguayana	EF587288	801
	Marmosa paraguayana	EF587289	803
	Marmosa paraguayana	EF587301	803
	Marmosa paraguayana	EF587302	803
	Marmosa paraguayana	EF587304	803
	Marmosa paraguayana	EF587305	803
	Marmosa paraguayana	EF587308	803
	Marmosa paraguayana	GU112919	800
	Marmosa paraguayana	GU112921	801
	Marmosa paraguayana	GU112922	801
	Marmosa paraguayana	GU112923	801
	Marmosa paraguayana	GU112924	801
	Marmosa paraguayana	HM106372	1146
	Marmosa paraguayana	JN887137	801
	Marmosa paraguayana	JN887138	801
	Marmosa paraguayana	JN887139	801
	Marmosa paraguayana	JN887140	801
	Marmosa paraguayana	JN887141	630
	Marmosa paraguayana	MN978643	1146
	Marmosa parda	MN978644	475
	Marmosa perplexa	MN978645	475
	Marmosa perplexa	MN978646	1146
	Marmosa phaea	MN978647	1146
	Marmosa phaea	MN978649	475
	Marmosa phaea	MN978650	726
	Marmosa phaea	MN978651	1146
	Marmosa phaea	MN978652	978
	Marmosa phaea	MN978653	475
	Marmosa phaea	MN978656	1146
	Marmosa phaea	MN992049	601
	Marmosa phaea	MN992050	601
	Marmosa rapposa	MN978658	498
	Marmosa rapposa	MN978661	1146
	Marmosa rapposa	MN978662	1146
	Marmosa rapposa	MN978663	1146
	Marmosa rapposa	MN978664	1146
	Marmosa rapposa	MN978665	498
	Marmosa rapposa	MN978666	1146
	Marmosa rapposa	MN978668	1146
	Marmosa rapposa	MN978669	1146
	Marmosa rapposa	MN978671	1146
	Marmosa rapposa	MN978674	1146
	Marmosa rapposa	MN978675	1146
	Marmosa regina	HM106370	1146
	Marmosa regina	JN887142	630
	Marmosa regina	U34675	1146
	Marmosa robinsoni	HM106350	1146
	Marmosa robinsoni	HM106351	1146
	Marmosa robinsoni	HM106352	1146
	Marmosa robinsoni	HM106354	1146
	Marmosa robinsoni	KM099919	726
	Marmosa robinsoni	KM099921	1142
	Marmosa robinsoni	KM099922	402
	Marmosa robinsoni	KM099926	402
	Marmosa robinsoni	KM099927	1146
	Marmosa robinsoni	KM099930	1146
	Marmosa robinsoni	KM099931	726
	Marmosa robinsoni	KM099932	1136
	Marmosa robinsoni	KM099937	1140
	Marmosa robinsoni	KM099939	180
	Marmosa robinsoni	KM099940	352
	Marmosa robinsoni	KM099942	389
	Marmosa robinsoni	KM099945	402
	Marmosa robinsoni	KM099946	402
	Marmosa robinsoni	KM099947	385
	Marmosa robinsoni	HM106362	1145
	Marmosa robinsoni	HM106363	1146
	Marmosa robinsoni	HM106364	1140
	Marmosa robinsoni	HM106365	1146
	Marmosa robinsoni	MT814778	721
	Marmosa robinsoni	HM106341	1146
	Marmosa robinsoni	HM106343	1146
	Marmosa rubra	HM106366	1146
	Marmosa rubra	HM106367	402
	Marmosa rutteri	MN978676	475
	Marmosa rutteri	MN978677	1146
	Marmosa rutteri	MN978678	1146
	Marmosa rutteri	MN992051	1146
	Marmosa sp.	MN978680	1146
	Marmosa sp.	MN978679	1146
	Marmosa sp.	MN978681	1146
	Marmosa tyleriana	HM106379	398
	Marmosa tyleriana	HM106380	399
	Marmosa xerophila	HM106347	1146
	Marmosa xerophila	HM106348	1146
	Marmosa xerophila	HM106349	402
	Micoureus sp.	OL800354	329
	Thylamys elegans	MK907779	1146

## Sheet: Myotis
	Cytb				COI
	scientific name	Genbank Accession	Length (bp)		scientific name	Genbank Accession	Length (bp)
	Eptesicus nilssonii	AF376836	1140		Lasiurus blossevillii	JF448048	657
	Eptesicus serotinus	AF376837	1140		Myotis albescens	EF080487	657
	Myotis albescens	AF376839	1140		Myotis albescens	EF080488	657
	Myotis albescens	JX130444	1140		Myotis albescens	EF080489	657
	Myotis albescens	JX130445	1140		Myotis albescens	EF080491	655
	Myotis albescens	JX130463	1140		Myotis albescens	EU096807	657
	Myotis albescens	JX130464	1140		Myotis albescens	HQ545684	657
	Myotis albescens	JX130465	1140		Myotis albescens	JF448094	657
	Myotis albescens	JX130472	1140		Myotis albescens	JF455101	657
	Myotis albescens	JX130500	1140		Myotis albescens	JF448095	657
	Myotis albescens	JX130501	1140		Myotis albescens	JF455103	657
	Myotis albescens	JX130502	1140		Myotis albescens	JF455112	657
	Myotis albescens	JX130503	1140		Myotis albescens	JN847706	655
	Myotis albescens	JX130504	1140		Myotis albescens	JF455110	657
	Myotis albescens	JX130523	1140		Myotis albescens	EF080490	657
	Myotis albescens	JX444129	1140		Myotis armiensis	MW042013	657
	Myotis albescens	MK799657	1116		Myotis keaysi	JF446533	356
	Myotis atacamensis	AM261882	1140		Myotis keaysi	JF446534	401
	Myotis atacamensis	OP270158	1086		Myotis keaysi	JF446535	657
	Myotis atacamensis	OP270159	1086		Myotis keaysi	JF446537	657
	Myotis cf. albescens	JX130466	1140		Myotis keaysi	JF446808	657
	Myotis cf. albescens	JX130467	1140		Myotis keaysi	JF446809	657
	Myotis cf. albescens	JX130479	1140		Myotis keaysi	JF446810	657
	Myotis cf. albescens	JX130480	1140		Myotis keaysi	JF447270	657
	Myotis cf. albescens	JX130497	1140		Myotis keaysi	JF447271	657
	Myotis cf. keaysi	JX130493	1140		Myotis keaysi	JF447274	657
	Myotis cf. keaysi	JX130519	1140		Myotis keaysi	JF447275	657
	Myotis cf. nigricans	JX130435	1140		Myotis keaysi	JF447424	657
	Myotis cf. nigricans	JX130447	1140		Myotis keaysi	KX814393	657
	Myotis cf. nigricans	JX130448	1140		Myotis keaysi	KX814394	657
	Myotis cf. nigricans	JX130450	1140		Myotis keaysi	KX814395	657
	Myotis cf. nigricans	JX130452	1140		Myotis keaysi	KX814396	657
	Myotis cf. nigricans	JX130453	1140		Myotis keaysi	KX814398	657
	Myotis cf. nigricans	JX130454	1140		Myotis keaysi	KX814399	657
	Myotis cf. nigricans	JX130457	1140		Myotis keaysi	KX814401	657
	Myotis cf. nigricans	JX130470	1140		Myotis keaysi	KX814402	657
	Myotis cf. nigricans	JX130476	1140		Myotis keaysi	KX814403	657
	Myotis cf. nigricans	JX130484	1140		Myotis keaysi	JF446525	657
	Myotis cf. nigricans	JX130489	1140		Myotis keaysi	JF446530	657
	Myotis cf. nigricans	JX130490	1140		Myotis keaysi	HM208665	657
	Myotis cf. nigricans	JX130492	1140		Myotis keaysi	HM208666	657
	Myotis cf. nigricans	JX130494	1140		Myotis nattereri	JF443015	556
	Myotis cf. nigricans	JX130496	1140		Myotis nattereri	KY754521	556
	Myotis cf. nigricans	JX130498	1140		Myotis nattereri	JX008072	556
	Myotis cf. nigricans	JX130499	1140		Myotis nattereri	FR856711	556
	Myotis cf. nigricans	JX130505	1140		Myotis nattereri	FR856712	556
	Myotis cf. nigricans	JX130517	1140		Myotis nattereri	FR856713	556
	Myotis cf. nigricans	JX130520	1140		Myotis nattereri	FR856715	556
	Myotis cf. riparius	JX130485	1140		Myotis nattereri	FR856718	556
	Myotis cf. riparius	JX130486	1140		Myotis nattereri	FR856719	556
	Myotis cf. riparius	JX130513	1140		Myotis nattereri	FR856720	556
	Myotis cf. riparius	JX130514	1140		Myotis nattereri	FR856721	657
	Myotis cf. simus	JX130456	1140		Myotis nattereri	JX008073	446
	Myotis cf. simus	JX130481	1140		Myotis nattereri	FR856731	654
	Myotis chiloensis	AM261888	1140		Myotis nattereri	GU270561	655
	Myotis chiloensis	OP270161	1086		Myotis nigricans	JN847708	657
	Myotis chiloensis	OP270162	1086		Myotis nigricans	JQ601611	657
	Myotis chiloensis	OP270166	801		Myotis nigricans	KX814404	657
	Myotis chiloensis	OP270163	1086		Myotis nigricans	MG191815	594
	Myotis chiloensis	OP270164	1086		Myotis nigricans	MG191831	657
	Myotis chiloensis	OP270165	1086		Myotis nigricans	EF080493	657
	Myotis diminutus	MW561077	1014		Myotis nigricans	EF080494	641
	Myotis diminutus	MW561079	1014		Myotis nigricans	EU096808	527
	Myotis diminutus	MW561080	475		Myotis nigricans	JQ601582	635
	Myotis diminutus	MW561081	999		Myotis nigricans	JQ601557	657
	Myotis diminutus	MW561082	763		Myotis nigricans	JQ601589	657
	Myotis diminutus	MW561083	1036		Myotis nigricans	JQ601590	657
	Myotis handleyi	OL840903	802		Myotis nigricans	JQ601600	657
	Myotis handleyi	OL840904	804		Myotis nigricans	JQ601558	657
	Myotis keaysi	AF376852	1140		Myotis nigricans	JQ601561	657
	Myotis keaysi	JX130449	1140		Myotis nigricans	JQ601562	657
	Myotis keaysi	JX130525	1140		Myotis nigricans	JQ601569	657
	Myotis keaysi	JX130526	1140		Myotis nigricans	JQ601572	657
	Myotis keaysi	MW025273	710		Myotis nigricans	JQ601574	657
	Myotis keaysi	MW089478	706		Myotis nigricans	JQ601587	657
	Myotis keaysi	MW089479	706		Myotis nigricans	MG191871	657
	Myotis keaysi	MW089480	706		Myotis nigricans	MG191903	657
	Myotis keaysi	MW089481	706		Myotis nigricans	MG191862	657
	Myotis levis	AF376853	1140		Myotis nigricans	MG182658	657
	Myotis levis	JX130475	1140		Myotis oxyotus gardneri	KX814405	657
	Myotis levis	MT262853	1111		Myotis oxyotus gardneri	KX814406	657
	Myotis levis	MT262857	1115		Myotis oxyotus gardneri	KX814407	657
	Myotis levis	MT262871	1134		Myotis oxyotus gardneri	KX814408	657
	Myotis midastactus	MW323450	1140		Myotis oxyotus gardneri	MW042015	657
	Myotis nigricans	AF376864	1140		Myotis oxyotus	JN847707	657
	Myotis nigricans	JX130528	530		Myotis pilosotibialis	MW042011	657
	Myotis nigricans	JX130529	1140		Myotis riparius	JQ601552	657
	Myotis nigricans	JX130530	1140		Myotis riparius	JQ601553	657
	Myotis nigricans	JX130534	519		Myotis riparius	JQ601563	657
	Myotis nigricans	JX130535	1140		Myotis riparius	JQ601566	657
	Myotis nigricans	JX130536	512		Myotis riparius	JQ601567	657
	Myotis nigricans	JX130537	521		Myotis riparius	JQ601568	657
	Myotis nigricans	JX444125	1140		Myotis riparius	JQ601576	657
	Myotis nigricans	JX444126	1140		Myotis riparius	JQ601578	657
	Myotis nigricans	JX444127	1140		Myotis riparius	JQ601581	655
	Myotis nigricans	JX444128	1140		Myotis riparius	JQ601594	657
	Myotis nigricans	MT262815	1112		Myotis riparius	JQ601595	657
	Myotis nigricans	MT262825	1120		Myotis riparius	JQ601633	657
	Myotis nigricans	MT262828	1110		Myotis riparius	JQ601638	657
	Myotis nigricans	MT262831	1122		Myotis riparius	EF080507	657
	Myotis nigricans	MT262833	1115		Myotis riparius	EF080508	655
	Myotis nigricans	MT262866	1115		Myotis riparius	EF080509	655
	Myotis nigricans	MW561085	789		Myotis riparius	EF080510	657
	Myotis nigricans	MW561086	870		Myotis riparius	EF080511	657
	Myotis nigricans	MW561087	873		Myotis riparius	EF080514	657
	Myotis nigricans	MW561088	968		Myotis riparius	EF080515	657
	Myotis nigricans	MW561089	965		Myotis riparius	EF080517	657
	Myotis nigricans	MW561091	1047		Myotis riparius	JQ601546	657
	Myotis oxyotus	AF376865	1140		Myotis riparius	JQ601547	657
	Myotis oxyotus	MW089499	674		Myotis riparius	JQ601549	657
	Myotis oxyotus	MW561093	1030		Myotis riparius	JQ601550	657
	Myotis oxyotus	MW561094	1012		Myotis riparius	JQ601551	603
	Myotis oxyotus	MW561095	927		Myotis riparius	JQ601597	202
	Myotis oxyotus	MW561096	901		Myotis riparius	JQ601635	657
	Myotis pilosotibialis	MW025271	931		Myotis riparius	EF080498	657
	Myotis pilosotibialis	MW025272	706		Myotis riparius	EF080505	657
	Myotis pilosotibialis	MW025275	706		Myotis riparius	JQ601577	657
	Myotis riparius	AF376866	1140		Myotis riparius	HQ919740	657
	Myotis riparius	JX130469	1073		Myotis riparius	JN847709	657
	Myotis riparius	JX130473	1140		Myotis riparius	JQ601201	657
	Myotis riparius	JX130474	1140		Myotis riparius	JQ601230	655
	Myotis riparius	JX130491	1140		Myotis riparius	JQ601604	657
	Myotis riparius	JX130515	1140		Myotis riparius	JQ601605	657
	Myotis riparius	JX130543	1140		Myotis riparius	JQ601606	657
	Myotis riparius	JX130556	1140		Myotis riparius	JQ601607	657
	Myotis riparius	JX130563	1140		Myotis riparius	JQ601609	657
	Myotis riparius	JX130571	1140		Myotis riparius	JQ601610	655
	Myotis riparius	MW089486	706		Myotis riparius	JQ601613	657
	Myotis riparius	MW089487	706		Myotis riparius	JQ601614	657
	Myotis riparius	MW089488	706		Myotis riparius	JQ601615	657
	Myotis riparius	MW089489	706		Myotis riparius	JQ601618	657
	Myotis riparius	MW089490	706		Myotis riparius	JQ601619	657
	Myotis riparius	MW089491	706		Myotis riparius	JQ601622	657
	Myotis riparius	MW089492	706		Myotis riparius	JQ601623	657
	Myotis riparius	MW089493	706		Myotis riparius	JQ601625	657
	Myotis riparius	MW089494	706		Myotis riparius	JQ601627	657
	Myotis riparius	MW089495	706		Myotis riparius	JQ601628	657
	Myotis riparius	MW089496	706		Myotis riparius	JQ601629	657
	Myotis riparius	MW089497	681		Myotis riparius	JQ601645	641
	Myotis riparius	MW089498	681		Myotis riparius	EF080495	657
	Myotis riparius	MW323447	741		Myotis riparius	JQ601554	657
	Myotis riparius	MW323448	741		Myotis riparius	KX755981	657
	Myotis riparius	MW323449	741		Myotis riparius	JQ601608	657
	Myotis riparius	MW557650	1140		Myotis riparius	JQ601616	657
	Myotis rosseti	KF312527	1140		Myotis riparius	JQ601617	657
	Myotis ruber	AF376867	1140		Myotis riparius	EF080506	657
	Myotis simus	AM262336	1140		Myotis riparius	EF080513	657
	Myotis simus	JX130506	1140		Myotis riparius	JQ601634	657
	Myotis simus	JX130572	520		Myotis riparius	KT236205	655
					Myotis riparius	JQ601564	657
					Myotis riparius	JQ601647	653
					Myotis ruber	JF446380	657

## Sheet: Nephelomys
	Cytb				COI
	scientific name	Genbank Accession	Length (bp)		scientific name	Genbank Accession	Length (bp)
	Nephelomys albigularis	EU579505	1143		Nephelomys albigularis	EU095459	657
	Nephelomys albigularis	GU126532	686		Nephelomys albigularis	JF491737	657
	Nephelomys albigularis	KP778226	1143		Nephelomys albigularis	JF491741	657
	Nephelomys albigularis	KP778383	1143		Nephelomys albigularis	JF491742	657
	Nephelomys albigularis	KP778415	801		Nephelomys albigularis	JF491745	657
	Nephelomys albigularis	MZ736529	801		Nephelomys albigularis	JF491746	657
	Nephelomys albigularis	MZ736531	801		Nephelomys albigularis	JF491750	657
	Nephelomys albigularis	MZ736532	801		Nephelomys albigularis	JF491758	657
	Nephelomys albigularis	MZ736533	801		Nephelomys albigularis	JF491760	657
	Nephelomys albigularis	MZ736534	801		Nephelomys albigularis	JF491763	657
	Nephelomys albigularis	MZ736535	801		Nephelomys albigularis	MZ364418	657
	Nephelomys albigularis	MZ736536	801		Nephelomys childi	MZ364419	657
	Nephelomys albigularis	MZ736537	794		Nephelomys childi	MZ364420	657
	Nephelomys albigularis	MZ736538	801		Nephelomys childi	MZ364423	657
	Nephelomys albigularis	MZ736541	801		Nephelomys meridensis	MZ364424	569
	Nephelomys albigularis	MZ736543	801		Nephelomys moerex	MF806198	657
	Nephelomys albigularis	MZ736545	801		Nephelomys moerex	MF806199	657
	Nephelomys albigularis	MZ736548	801		Nephelomys moerex	MF806200	657
	Nephelomys albigularis	MZ736549	801		Nephelomys moerex	MF806201	657
	Nephelomys albigularis	MZ736550	801		Nephelomys moerex	MF806202	657
	Nephelomys devius	KP778209	1143		Nephelomys moerex	MF806203	657
	Nephelomys devius	KP778258	801		Nephelomys moerex	MF806204	657
	Nephelomys devius	KP778272	801		Nephelomys sp.	MF806205	639
	Nephelomys devius	KP778411	1143		Nephelomys sp.	MF806206	654
	Nephelomys devius	MN547684	1149		Transandinomys talamancae	JF492271	657
	Nephelomys devius	MN547686	1149
	Nephelomys devius	MN547687	1149
	Nephelomys devius	MN547688	1149
	Nephelomys devius	MN547689	1149
	Nephelomys devius	MN547690	1149
	Nephelomys devius	MN547692	1149
	Nephelomys devius	MN547696	1149
	Nephelomys devius	MN547700	1149
	Nephelomys devius	MN547701	1149
	Nephelomys devius	MN547703	1149
	Nephelomys devius	MN547704	1149
	Nephelomys devius	MN547710	1149
	Nephelomys devius	MN547717	1149
	Nephelomys devius	MN547720	1149
	Nephelomys devius	MN547721	1149
	Nephelomys devius	MN547722	1149
	Nephelomys devius	MN547725	1149
	Nephelomys devius	MN547732	1149
	Nephelomys keaysi	KY754067	1144
	Nephelomys keaysi	MZ736526	1144
	Nephelomys keaysi	MZ736527	1144
	Nephelomys keaysi	MZ736528	417
	Nephelomys levipes	JF693875	801
	Nephelomys levipes	KY754068	801
	Nephelomys ricardopalmai	MZ736551	773
	Nephelomys ricardopalmai	MZ736552	801
	Nephelomys ricardopalmai	MZ736553	426
	Nephelomys ricardopalmai	MZ736554	801
	Nephelomys ricardopalmai	MZ736555	801
	Nephelomys ricardopalmai	MZ736556	801
	Nephelomys ricardopalmai	MZ736557	801
	Nephelomys ricardopalmai	MZ736558	801
	Nephelomys ricardopalmai	MZ736559	801
	Sigmodontinae gen.	MT700413	801
	Sigmodontinae gen.	MT700415	801
	Sigmodontinae gen.	MT700416	801
	Sigmodontinae gen.	MT700417	807
	Sigmodontinae gen.	MT700418	807
	Sigmodontinae gen.	MT700419	807
	Sigmodontinae gen.	MT700420	807
	Sigmodontinae gen.	MT700421	807
	Sigmodontinae gen.	MT700422	807
	Sigmodontinae gen.	MT700423	807
	Transandinomys talamancae	KP778208	1143

## Sheet: Sturnira
	Cytb				COI
	scientific name	Genbank Accession	Length (bp)		scientific name	Genbank Accession	Length (bp)
	Carollia manu	KC753898	1140		Centurio senex	JF447241	657
	Centurio senex	AY604444	1140		Sturnira bidens	JN659511	654
	Sturnira adrianae	KY366229	792		Sturnira bidens	JN659512	654
	Sturnira adrianae	KY366230	792		Sturnira bidens	JN659514	654
	Sturnira adrianae	KY366231	792		Sturnira bidens	JN659523	654
	Sturnira adrianae	KY366232	792		Sturnira bidens	JN659525	654
	Sturnira adrianae	KY366233	792		Sturnira bidens	JN659527	654
	Sturnira adrianae	KY366234	792		Sturnira bidens	JN659529	365
	Sturnira adrianae	KY366235	792		Sturnira bidens	JN659530	609
	Sturnira bakeri	MF441772	1140		Sturnira bidens	JN659539	654
	Sturnira bogotensis	KC753783	1140		Sturnira bidens	JN659540	654
	Sturnira bogotensis	KC753787	1140		Sturnira bidens	JN659549	654
	Sturnira erythromos	FJ154179	1140		Sturnira bidens	JN659553	654
	Sturnira erythromos	JX444094	1140		Sturnira bidens	JN659554	654
	Sturnira erythromos	KC753788	1140		Sturnira bidens	JN659555	313
	Sturnira erythromos	KC753789	1140		Sturnira bidens	JN659556	419
	Sturnira erythromos	KC753790	1140		Sturnira bidens	JN659558	419
	Sturnira erythromos	KC753791	1140		Sturnira bidens	JN659559	419
	Sturnira erythromos	KC753792	1140		Sturnira bidens	JN659562	207
	Sturnira hondurensis	KC753794	1140		Sturnira bidens	JN659563	657
	Sturnira hondurensis	KC753795	1140		Sturnira burtonlimi	KX814414	657
	Sturnira hondurensis	KC753796	1140		Sturnira burtonlimi	KX814415	657
	Sturnira hondurensis	KC753797	1140		Sturnira burtonlimi	KX814416	657
	Sturnira hondurensis	KC753798	1140		Sturnira burtonlimi	KX814417	657
	Sturnira hondurensis	KC753799	1140		Sturnira burtonlimi	KX814419	657
	Sturnira hondurensis	KC753825	1140		Sturnira burtonlimi	KX814421	657
	Sturnira hondurensis	KC753826	1140		Sturnira erythromos	JN659568	654
	Sturnira hondurensis	KC753827	1140		Sturnira erythromos	JN659569	654
	Sturnira lilium	DQ903814	1126		Sturnira erythromos	JN659571	654
	Sturnira lilium	DQ903815	1140		Sturnira erythromos	JN659572	654
	Sturnira lilium	EF536933	739		Sturnira erythromos	JN659573	654
	Sturnira lilium	EF536935	739		Sturnira erythromos	JN659574	654
	Sturnira lilium	EF536936	646		Sturnira erythromos	JN659575	654
	Sturnira lilium	EF536938	672		Sturnira erythromos	JN659580	654
	Sturnira lilium	EF536940	645		Sturnira erythromos	JN659581	654
	Sturnira lilium	EF536941	577		Sturnira erythromos	JN659584	654
	Sturnira lilium	EF536943	609		Sturnira erythromos	JN659592	654
	Sturnira lilium	EF536944	656		Sturnira erythromos	JN659594	654
	Sturnira lilium	EF536945	494		Sturnira erythromos	JN659595	654
	Sturnira lilium	EF536946	633		Sturnira erythromos	JN659596	654
	Sturnira lilium	EF536947	586		Sturnira erythromos	JN659597	654
	Sturnira lilium	EF536951	653		Sturnira erythromos	JN659598	654
	Sturnira lilium	EF536952	578		Sturnira erythromos	JN659599	654
	Sturnira lilium	EF536953	640		Sturnira erythromos	JN659601	648
	Sturnira lilium	EF536954	621		Sturnira erythromos	JN659603	648
	Sturnira lilium	EF536955	673		Sturnira erythromos	JN659604	648
	Sturnira lilium	EF536958	665		Sturnira erythromos	JN659608	654
	Sturnira lilium	EF536959	630		Sturnira erythromos	JN659609	654
	Sturnira lilium	EF536964	669		Sturnira erythromos	JN659610	654
	Sturnira lilium	EF536965	620		Sturnira erythromos	JN659611	654
	Sturnira lilium	EF536966	627		Sturnira erythromos	JN659612	654
	Sturnira lilium	KC753800	602		Sturnira erythromos	JN659613	654
	Sturnira lilium	KC753801	651		Sturnira erythromos	JN659614	654
	Sturnira lilium	KC753802	1140		Sturnira erythromos	JN659617	654
	Sturnira lilium	KC753803	1140		Sturnira erythromos	JN659619	419
	Sturnira lilium	KC753804	1140		Sturnira erythromos	JN659620	419
	Sturnira lilium	KC753805	1140		Sturnira erythromos	JN659623	419
	Sturnira lilium	KC753828	1140		Sturnira erythromos	JN659624	419
	Sturnira lilium	KC753829	1140		Sturnira erythromos	JN659625	419
	Sturnira lilium	KC753831	1140		Sturnira erythromos	JN659629	419
	Sturnira lilium	KC753832	1140		Sturnira erythromos	JN659630	419
	Sturnira lilium	KC753833	1140		Sturnira erythromos	JN659632	419
	Sturnira lilium	KC753834	1140		Sturnira erythromos	JN659636	458
	Sturnira lilium	KC753835	1140		Sturnira lilium	EF080684	657
	Sturnira lilium	KC753836	1140		Sturnira lilium	EF080689	654
	Sturnira lilium	KC753837	1140		Sturnira lilium	EF546821	657
	Sturnira lilium	KC753838	1140		Sturnira lilium	EF546825	656
	Sturnira lilium	KC753839	1140		Sturnira lilium	EF546826	657
	Sturnira lilium	KC753840	1140		Sturnira lilium	EF546827	656
	Sturnira lilium	KC753841	1140		Sturnira lilium	EF546830	657
	Sturnira lilium	KC753842	1140		Sturnira lilium	EF546832	657
	Sturnira lilium	KC753843	1140		Sturnira lilium	EF546833	657
	Sturnira lilium	KC753844	1140		Sturnira lilium	EF546835	657
	Sturnira lilium	KC753845	1140		Sturnira lilium	EF546844	657
	Sturnira lilium	KC753846	1140		Sturnira lilium	EF546846	657
	Sturnira lilium	KC753847	1140		Sturnira lilium	EU097035	657
	Sturnira lilium	KC753848	1140		Sturnira lilium	EU097037	657
	Sturnira lilium	KC753849	1140		Sturnira lilium	EU097040	657
	Sturnira lilium	KC753878	1140		Sturnira lilium	EU097042	657
	Sturnira lilium	KC753884	1140		Sturnira lilium	HQ545497	657
	Sturnira lilium	MF441769	1140		Sturnira lilium	HQ919703	657
	Sturnira lilium	MF441770	1140		Sturnira lilium	HQ919708	657
	Sturnira lilium	MF441771	1140		Sturnira lilium	HQ919753	657
	Sturnira ludovici	KC753806	1140		Sturnira lilium	JF446386	657
	Sturnira ludovici	KC753807	1140		Sturnira lilium	JF446388	657
	Sturnira luisi	KC753808	1140		Sturnira lilium	JF446389	657
	Sturnira luisi	KC753809	1140		Sturnira lilium	JF446546	657
	Sturnira luisi	KC753810	1140		Sturnira lilium	JF446548	657
	Sturnira luisi	KC753811	1140		Sturnira lilium	JF446549	657
	Sturnira luisi	KC753812	1140		Sturnira lilium	JF446550	657
	Sturnira luisi	KC753813	1140		Sturnira lilium	JF446830	657
	Sturnira luisi	KC753814	1140		Sturnira lilium	JF446832	653
	Sturnira luisi	MF441761	1140		Sturnira lilium	JF446836	657
	Sturnira luisi	MF441764	1140		Sturnira lilium	JF446840	657
	Sturnira luisi	MF441766	1140		Sturnira lilium	JF446844	657
	Sturnira luisi	MF441767	1140		Sturnira lilium	JF446849	657
	Sturnira luisi	MF441768	1140		Sturnira lilium	JF446851	657
	Sturnira magna	KC753816	1140		Sturnira lilium	JF446852	644
	Sturnira magna	KC753817	1140		Sturnira lilium	JF446855	657
	Sturnira magna	KC753818	1140		Sturnira lilium	JF446856	657
	Sturnira magna	KC753819	1140		Sturnira lilium	JF446857	657
	Sturnira mordax	KC753821	1140		Sturnira lilium	JF446859	657
	Sturnira mordax	KC753822	1140		Sturnira lilium	JF446860	657
	Sturnira mordax	KC753823	1140		Sturnira lilium	JF446865	657
	Sturnira mordax	KC753824	1140		Sturnira lilium	JF446867	657
	Sturnira oporaphilum	KC753850	1140		Sturnira lilium	JF447333	657
	Sturnira oporaphilum	KC753851	1140		Sturnira lilium	JF447335	657
	Sturnira oporaphilum	KC753852	1140		Sturnira lilium	JF447337	657
	Sturnira oporaphilum	KC753853	1140		Sturnira lilium	JF447338	657
	Sturnira oporaphilum	KC753854	1140		Sturnira lilium	JF447434	657
	Sturnira oporaphilum	KC753856	1140		Sturnira lilium	JF447435	657
	Sturnira parvidens	KC753857	1140		Sturnira lilium	JF447731	657
	Sturnira parvidens	KC753858	1140		Sturnira lilium	JF447732	657
	Sturnira parvidens	KC753859	1140		Sturnira lilium	JF448132	657
	Sturnira parvidens	KC753860	1140		Sturnira lilium	JF448133	657
	Sturnira parvidens	KC753861	1140		Sturnira lilium	JF448134	648
	Sturnira parvidens	KC753862	1140		Sturnira lilium	JF449158	657
	Sturnira parvidens	KC753863	1140		Sturnira lilium	JF449159	657
	Sturnira parvidens	KC753864	1140		Sturnira lilium	JF449160	657
	Sturnira parvidens	KC753865	1140		Sturnira lilium	JF449162	657
	Sturnira parvidens	KC753867	1140		Sturnira lilium	JF449163	657
	Sturnira parvidens	KC753868	1140		Sturnira lilium	JF449164	657
	Sturnira parvidens	KC753869	1140		Sturnira lilium	JF449165	657
	Sturnira parvidens	KC753870	1140		Sturnira lilium	JF449167	657
	Sturnira parvidens	KC753871	1140		Sturnira lilium	JF449168	657
	Sturnira parvidens	KC753872	1140		Sturnira lilium	JF449170	657
	Sturnira parvidens	KC753874	1140		Sturnira lilium	JF449171	657
	Sturnira parvidens	KC753875	1140		Sturnira lilium	JF449174	657
	Sturnira parvidens	MF441774	1140		Sturnira lilium	JF449175	657
	Sturnira parvidens	MF441777	1140		Sturnira lilium	JF449178	657
	Sturnira parvidens	MF441778	1140		Sturnira lilium	JF449180	657
	Sturnira parvidens	MF441779	1024		Sturnira lilium	JF449183	651
	Sturnira parvidens	MF441780	1140		Sturnira lilium	JF449185	651
	Sturnira parvidens	MF441782	1140		Sturnira lilium	JF449186	651
	Sturnira parvidens	MF441784	1140		Sturnira lilium	JF449187	657
	Sturnira parvidens	MF441785	1140		Sturnira lilium	JF449188	651
	Sturnira parvidens	MF441787	1140		Sturnira lilium	JF449189	657
	Sturnira parvidens	MF441788	1140		Sturnira lilium	JF449190	657
	Sturnira parvidens	MF441789	1140		Sturnira lilium	JF455754	657
	Sturnira parvidens	MF441791	1140		Sturnira lilium	JF455757	657
	Sturnira parvidens	MF441792	1140		Sturnira lilium	JF455758	657
	Sturnira parvidens	MF441793	1140		Sturnira lilium	JF455760	657
	Sturnira parvidens	MF441794	1140		Sturnira lilium	JF455763	657
	Sturnira parvidens	MF441796	1140		Sturnira lilium	JF455764	657
	Sturnira parvidens	MF441797	1140		Sturnira lilium	JF455771	657
	Sturnira parvidens	MF441799	1140		Sturnira lilium	JF455772	657
	Sturnira parvidens	MF441802	1140		Sturnira lilium	JF455779	657
	Sturnira parvidens	MF441803	1140		Sturnira lilium	JF455781	657
	Sturnira parvidens	MF441804	1140		Sturnira lilium	JF455787	657
	Sturnira parvidens	MF441805	1140		Sturnira lilium	JF455793	657
	Sturnira parvidens	MF441806	1140		Sturnira lilium	JF455801	635
	Sturnira parvidens	MF441808	1140		Sturnira lilium	JF455803	657
	Sturnira parvidens	MF441809	1140		Sturnira lilium	JF455813	643
	Sturnira parvidens	MF441810	1140		Sturnira lilium	JF455814	635
	Sturnira parvidens	MF441818	1140		Sturnira lilium	JF455816	648
	Sturnira parvidens	MF441819	1140		Sturnira lilium	JF455817	657
	Sturnira parvidens	MF441820	1140		Sturnira lilium	JF455818	657
	Sturnira parvidens	MF441821	1140		Sturnira lilium	JF455819	657
	Sturnira parvidens	MF441822	1140		Sturnira lilium	JF455821	654
	Sturnira parvidens	MF441823	1140		Sturnira lilium	JF455822	657
	Sturnira parvidens	MF441824	1140		Sturnira lilium	JF455824	657
	Sturnira parvidens	MF441825	1140		Sturnira lilium	JF455825	657
	Sturnira parvidens	MF441826	1140		Sturnira lilium	JF455830	657
	Sturnira parvidens	MF441827	1140		Sturnira lilium	JF455832	657
	Sturnira parvidens	MF441828	1140		Sturnira lilium	JF455833	657
	Sturnira parvidens	MF441829	1140		Sturnira lilium	JF455834	657
	Sturnira parvidens	MF441830	1140		Sturnira lilium	JF455836	657
	Sturnira parvidens	MF441831	1140		Sturnira lilium	JF455837	657
	Sturnira parvidens	MF441833	1140		Sturnira lilium	JF455845	657
	Sturnira parvidens	MF441835	1140		Sturnira lilium	JF455847	657
	Sturnira parvidens	MF441837	1140		Sturnira lilium	JF459281	657
	Sturnira parvidens	MF441838	1140		Sturnira lilium	JF499038	654
	Sturnira parvidens	MF441840	1140		Sturnira lilium	JF499040	657
	Sturnira parvidens	MF441841	1140		Sturnira lilium	JF499052	657
	Sturnira parvidens	MF441842	1140		Sturnira lilium	JF499055	657
	Sturnira parvidens	MF441844	1140		Sturnira lilium	JF499058	657
	Sturnira parvidens	MF441846	1140		Sturnira lilium	JF499061	657
	Sturnira parvidens	MF441847	1140		Sturnira lilium	JF499064	657
	Sturnira parvidens	MF441848	1140		Sturnira lilium	JN659640	654
	Sturnira parvidens	MF441849	1140		Sturnira lilium	JN659642	654
	Sturnira parvidens	MF441850	1140		Sturnira lilium	JN659649	654
	Sturnira parvidens	MF441852	1140		Sturnira lilium	JN659651	654
	Sturnira parvidens	MF441853	1140		Sturnira lilium	JN659653	654
	Sturnira parvidens	MF441855	1140		Sturnira lilium	JN659654	654
	Sturnira parvidens	MF441856	1140		Sturnira lilium	JN659655	654
	Sturnira parvidens	MF441857	1140		Sturnira lilium	JN659657	651
	Sturnira parvidens	MF441858	1140		Sturnira lilium	JN659658	654
	Sturnira parvidens	MF441861	1140		Sturnira lilium	JN659662	654
	Sturnira parvidens	MF441863	1140		Sturnira lilium	JN659664	654
	Sturnira parvidens	MF441865	1140		Sturnira lilium	JN659674	419
	Sturnira parvidens	MF441866	1140		Sturnira lilium	JN659675	419
	Sturnira parvidens	MF441867	1140		Sturnira lilium	JN659676	419
	Sturnira parvidens	MF441868	1140		Sturnira lilium	JN659680	419
	Sturnira parvidens	MF441869	1140		Sturnira lilium	JN659683	419
	Sturnira parvidens	MF441872	1140		Sturnira lilium	JN659684	419
	Sturnira parvidens	MF441876	1140		Sturnira lilium	JN659686	419
	Sturnira parvidens	MF441878	1140		Sturnira lilium	JN659689	203
	Sturnira parvidens	MF441881	1140		Sturnira lilium	JN659690	657
	Sturnira parvidens	MF441882	1140		Sturnira lilium	JN659692	657
	Sturnira parvidens	MF441884	1140		Sturnira lilium	MG182664	594
	Sturnira parvidens	MF441885	1140		Sturnira lilium	MG191813	625
	Sturnira parvidens	MF441888	1140		Sturnira lilium	MG191817	638
	Sturnira parvidens	MF441889	1140		Sturnira lilium	MG191861	624
	Sturnira parvidens	MF441890	1140		Sturnira lilium	OM978242	657
	Sturnira parvidens	MF441893	1140		Sturnira lilium	OM978244	657
	Sturnira parvidens	MF441894	1140		Sturnira lilium	OM978245	657
	Sturnira parvidens	MF441898	1140		Sturnira lilium	OM978246	657
	Sturnira parvidens	MF441900	1140		Sturnira lilium	OM978247	657
	Sturnira parvidens	MF441903	1140		Sturnira lilium	OM978248	657
	Sturnira parvidens	MF441904	1140		Sturnira lilium	OM978249	657
	Sturnira parvidens	MF441905	1140		Sturnira lilium	OM978250	657
	Sturnira parvidens	MF441906	1140		Sturnira lilium	OM978252	657
	Sturnira parvidens	MF441909	1140		Sturnira lilium	OM978253	657
	Sturnira parvidens	MF441910	1140		Sturnira lilium	OM978256	657
	Sturnira parvidens	MF441911	1140		Sturnira lilium	OM978257	657
	Sturnira parvidens	MF441912	1140		Sturnira lilium	OM978259	657
	Sturnira parvidens	MF441913	1140		Sturnira lilium	OM978260	657
	Sturnira parvidens	MF441914	1140		Sturnira ludovici	JF446552	657
	Sturnira parvidens	MF441915	1140		Sturnira ludovici	JF446553	657
	Sturnira parvidens	MF441916	1140		Sturnira ludovici	JF446555	657
	Sturnira parvidens	MF441917	1140		Sturnira ludovici	JF446556	657
	Sturnira parvidens	MF441918	1140		Sturnira ludovici	JF446560	657
	Sturnira parvidens	MF441919	1140		Sturnira ludovici	JF446565	657
	Sturnira parvidens	MF441920	1140		Sturnira ludovici	JF446566	657
	Sturnira parvidens	MF441921	1140		Sturnira ludovici	JF446872	657
	Sturnira parvidens	MF441923	1140		Sturnira ludovici	JF446873	657
	Sturnira parvidens	MF441926	1140		Sturnira ludovici	JF446875	657
	Sturnira parvidens	MF441927	1140		Sturnira ludovici	JF446876	657
	Sturnira sp.	MF441748	1140		Sturnira ludovici	JF446877	657
	Sturnira sp.	MF441749	1140		Sturnira ludovici	JF446878	657
	Sturnira sp.	MF441750	1140		Sturnira ludovici	JF447436	657
	Sturnira sp.	MF441751	1140		Sturnira ludovici	JF447437	657
	Sturnira sp.	MF441752	1140		Sturnira ludovici	JF447438	657
	Sturnira sp.	MF441753	1140		Sturnira ludovici	JF447439	657
	Sturnira sp.	MF441754	1140		Sturnira ludovici	JN659694	654
	Sturnira sp.	MF441755	1140		Sturnira ludovici	JN659695	654
	Sturnira sp.	MF441756	1140		Sturnira ludovici	JN659701	654
	Sturnira sp.	MF441758	1140		Sturnira ludovici	JN659703	654
	Sturnira sp.	MF441759	1140		Sturnira ludovici	JN659705	654
	Sturnira sp.	MF441760	1140		Sturnira ludovici	JN659706	654
	Sturnira tildae	DQ903816	1140		Sturnira ludovici	JN659711	654
	Sturnira tildae	KC753887	1140		Sturnira ludovici	JN659713	654
	Sturnira tildae	KC753888	739		Sturnira ludovici	JN659716	654
	Sturnira tildae	KC753889	1140		Sturnira ludovici	JN659717	654
	Sturnira tildae	KC753890	1140		Sturnira ludovici	JN659718	654
	Sturnira tildae	KC753891	1140		Sturnira ludovici	JN659722	654
	Sturnira tildae	KC753892	1140		Sturnira ludovici	JN659725	654
	Sturnira tildae	KC753893	1140		Sturnira ludovici	JN659726	654
	Sturnira tildae	KC753894	1140		Sturnira ludovici	JN659737	654
	Sturnira tildae	KC753895	1140		Sturnira ludovici	JN659738	654
	Sturnira tildae	KC753896	1140		Sturnira ludovici	JN659740	654
	Sturnira tildae	KC753897	1140		Sturnira ludovici	JN659741	654
					Sturnira ludovici	JN659742	654
					Sturnira ludovici	JN659743	654
					Sturnira ludovici	JN659745	654
					Sturnira ludovici	JN659746	654
					Sturnira ludovici	JN659747	654
					Sturnira ludovici	JN659749	654
					Sturnira ludovici	JN659753	639
					Sturnira ludovici	JN659757	404
					Sturnira ludovici	JN659759	648
					Sturnira ludovici	JN659760	648
					Sturnira ludovici	JN659762	648
					Sturnira ludovici	JN659768	648
					Sturnira ludovici	JN659769	648
					Sturnira ludovici	JN659774	654
					Sturnira ludovici	JN659775	654
					Sturnira ludovici	JN659776	654
					Sturnira ludovici	JN659777	654
					Sturnira ludovici	JN659778	419
					Sturnira ludovici	JN659779	419
					Sturnira ludovici	JN659780	419
					Sturnira luisi	JN659787	654
					Sturnira luisi	JN659801	654
					Sturnira luisi	JN659804	654
					Sturnira luisi	JN659808	654
					Sturnira luisi	JN659810	654
					Sturnira luisi	JN659820	654
					Sturnira luisi	JN659822	654
					Sturnira luisi	JN659823	654
					Sturnira luisi	JN659825	654
					Sturnira luisi	JN659829	654
					Sturnira luisi	JN659832	654
					Sturnira luisi	JN659833	654
					Sturnira luisi	JN659834	654
					Sturnira luisi	JN659835	654
					Sturnira luisi	JN659837	654
					Sturnira luisi	JN659841	654
					Sturnira luisi	JN659843	654
					Sturnira luisi	JN659845	654
					Sturnira luisi	JN659851	654
					Sturnira luisi	JN659857	654
					Sturnira luisi	JN659858	654
					Sturnira luisi	JN659860	636
					Sturnira luisi	JN659873	654
					Sturnira luisi	JN659880	653
					Sturnira luisi	JN659885	419
					Sturnira luisi	JN659887	419
					Sturnira luisi	JN659888	419
					Sturnira luisi	JN659889	371
					Sturnira magna	JF449195	657
					Sturnira magna	JF449197	657
					Sturnira magna	JF449202	657
					Sturnira magna	JF449203	657
					Sturnira magna	JF449205	657
					Sturnira magna	JF449207	653
					Sturnira magna	JF449210	657
					Sturnira magna	JF449215	657
					Sturnira magna	JF449216	657
					Sturnira magna	JF449219	657
					Sturnira magna	JF449221	657
					Sturnira magna	JF449223	643
					Sturnira magna	JN659890	654
					Sturnira magna	JN659895	636
					Sturnira magna	JN659900	419
					Sturnira magna	JN659901	419
					Sturnira magna	JN659902	419
					Sturnira magna	JN659903	419
					Sturnira magna	JN659904	419
					Sturnira magna	JN659905	418
					Sturnira magna	JN659906	419
					Sturnira parvidens	KX756039	201
					Sturnira parvidens	KX756040	201
					Sturnira perla	JN659908	654
					Sturnira perla	JN659909	654
					Sturnira perla	JN659912	419
					Sturnira tildae	EF080690	657
					Sturnira tildae	EF080691	657
					Sturnira tildae	EF080699	657
					Sturnira tildae	EF080701	657
					Sturnira tildae	EF080705	657
					Sturnira tildae	EF080708	657
					Sturnira tildae	EF080711	655
					Sturnira tildae	EF080712	657
					Sturnira tildae	EF080713	657
					Sturnira tildae	EF080717	657
					Sturnira tildae	EF080719	657
					Sturnira tildae	EF080724	657
					Sturnira tildae	EF080725	657
					Sturnira tildae	EF080727	657
					Sturnira tildae	EU097044	657
					Sturnira tildae	HQ545493	657
					Sturnira tildae	HQ545495	657
					Sturnira tildae	HQ919683	657
					Sturnira tildae	HQ919733	657
					Sturnira tildae	HQ919752	657
					Sturnira tildae	JF447733	650
					Sturnira tildae	JF447735	657
					Sturnira tildae	JF447738	656
					Sturnira tildae	JF447739	657
					Sturnira tildae	JF447740	657
					Sturnira tildae	JF449229	657
					Sturnira tildae	JF455848	657
					Sturnira tildae	JF455849	657
					Sturnira tildae	JF455851	657
					Sturnira tildae	JF455854	657
					Sturnira tildae	JF455855	657
					Sturnira tildae	JF455857	657
					Sturnira tildae	JF455861	657
					Sturnira tildae	JF455862	657
					Sturnira tildae	JF455863	657
					Sturnira tildae	JF455866	657
					Sturnira tildae	JF455868	657
					Sturnira tildae	JF455878	657
					Sturnira tildae	JF455879	657
					Sturnira tildae	JF455881	657
					Sturnira tildae	JF455887	657
					Sturnira tildae	JF455890	657
					Sturnira tildae	JF455895	657
					Sturnira tildae	JF455896	657
					Sturnira tildae	JF455897	657
					Sturnira tildae	JF455911	657
					Sturnira tildae	JF455920	657
					Sturnira tildae	JF455921	657
					Sturnira tildae	JF455922	657
					Sturnira tildae	JF455927	657
					Sturnira tildae	JF455928	657
					Sturnira tildae	JF455930	641
					Sturnira tildae	JF455941	655
					Sturnira tildae	JF455944	657
					Sturnira tildae	JF455946	657
					Sturnira tildae	JQ601088	657
					Sturnira tildae	JQ601089	657
					Sturnira tildae	JQ601095	657
					Sturnira tildae	JQ601096	656
					Sturnira tildae	JQ601103	655
					Sturnira tildae	JQ601110	657
					Sturnira tildae	JQ601111	657
					Sturnira tildae	JQ601118	657
					Sturnira tildae	JQ601127	657
					Sturnira tildae	JQ601131	657
					Sturnira tildae	JQ601368	653
					Sturnira tildae	JQ601397	657
					Sturnira tildae	JQ601405	657
					Sturnira tildae	JQ601415	564
