# Supplementary material for: Identification of non-model mammal species using the MinION DNA sequencer from Oxford Nanopore
Source: PeerJ. 2024 Sep 25;12:e17887. doi: 10.7717/peerj.17887 (PMC11438440; doi:10.7717/peerj.17887)
Supplement: Supplemental Information 4 [file peerj-12-17887-s004.xlsx]

## Sheet: Table S1
	Marker	Genus	Sample size (n)	Ingroup size	Outgroup size	Substitution model	Nucleotide coverage
	COI	Akodon	134	133	1	K3Pu+F+I+G4	0.9946
		Artibeus	887	881	6	K3Pu+F+I+G4	0.9793
		Handleyomys	148	147	1	TIM2+F+I+G4	0.9987
		Histiotus	76	75	1	HKY+F+G4	0.9999
		Marmosa	126	125	1	TIM2+F+I+G4	0.9839
		Myotis	152	151	1	HKY+F+I+G4	0.9736
		Nephelomys	25	24	1	TPM2u+F+I+G4	0.9938
		Sturnira	395	394	1	UNREST+FO+I+G4	0.9549
	CYTB	Akodon	206	183	23	TPM2u+F+I+G4	0.857
		Artibeus	598	593	5	TN+F+I+G4	0.9016
		Carollia	236	235	1	K3Pu+F+I+G4	0.9075
		Handleyomys	213	182	31	K3Pu+F+I+G4	0.9399
		Histiotus	48	44	4	TPM2u+F+I	0.8999
		Marmosa	624	620	4	TIM2+F+I+G4	0.7718
		Myotis	149	147	2	HKY+F+I+G4	0.8904
		Nephelomys	69	58	11	TIM2+F+I+G4	0.7965
		Sturnira	252	250	2	K3Pu+F+I+G4	0.9496

## Sheet: Table S2
	Collector ID	Morphological ID	% mtDNA (Minimap2)	% mtDNA (mtBlaster)	WGS- Flye assembly depth (X)	WGS- Rebaler assembly depth (X)	Minimap2-Flye assembly depth (X)	Minimap2-Rebaler assembly depth (X)	mtBlaster-Flye assembly depth (X)	mtBlaster-Rebaler assembly depth (X)
	EAFIT-M 2126	Anoura caudata	-	-	NA	NA	NA	NA	NA	NA
	EAFIT-M 2106	Myotis riparius	0.0157052	0.0189705	not assembled	0.0963443	not assembled	2.42101	not assembled	2.92436
	EAFIT-M 2143	Nephelomys pectoralis	0.0741301	0.0808937	6	6.49732	10.86	11.4759	11.8543	12.5121
	EAFIT-M 2107	Histiotus humboldtii	0.0550625	0.039996	not assembled	4.22154	4.25	4.28859	3.08968	3.22143
	EAFIT-M 2124	Rhipidomys latimanus	0.0513494	0	11	not assembled	22.54	23.238	not assembled	NA
	EAFIT-M 2116	Handleyomys alfaroi	0.0296148	0.0393686	not assembled	2.836	NA	3.54808	not assembled	4.71984
	EAFIT-M 2160	Sturnira bogotensis	0.0157544	0.0358436	4	4.29017	5.98	5.82726	13.602	13.2698
	EAFIT-M 2157	Carollia brevicauda	0	0.0265672	4	3.95627	not mtDNA reads	not mtDNA reads	not assembled	4.39794
	EAFIT-M 2164	Anoura geoffroyi	0.0914438	0.0834709	not assembled	19.8102	63.17	40.244	57.6607	36.6901
	EAFIT-M 2158	Artibeus lituratus	0.036099	0.0291031	3	2.85345	NA	6.12075	not assembled	4.7213
	EAFIT-M 2167	Glossophaga soricina	0.000291894	0.000568632	not assembled	0.0383616	NA	0.0314142	not assembled	0.0611974
	EAFIT-M 2166	Artibeus lituratus	0.0161212	0.0225519	5	5.25652	NA	6.49421	not assembled	9.08027
	EAFIT-M 2165	Sturnira bogotensis	0.0046562	0.0265313	not assembled	0.69312	NA	0.727339	not assembled	4.14442
	EAFIT-M 2168	Carollia brevicauda	0.0124306	0.0169924	4	4.07473	4.16	4.41234	5.68945	6.02971
	EAFIT-M 2151	Nephelomys childi	0.0808224	0.0646422	14	13.5147	45.79	45.9369	36.6209	36.9227
	EAFIT-M 2159	Myotiscaucensis	0.0125759	0.0125759	not assembled	3.39596	6.07	3.9066	6.07122	3.90638
	EAFIT-M 2150	Nephelomys childi	0.0945938	0.0568774	17	15.0927	53.75	53.7306	32.3171	32.2952
	EAFIT-M 2152	Molossus molossus	0.10237	0.0621306	not assembled	13.6388	NA	43.971	not assembled	28.7079
	EAFIT-M 2161	Akodon affinis	0.0446358	0.0566405	14	13.8175	20.56	21.2024	26.093	26.9216
	EAFIT-M 2153	Artibeus lituratus	-	-	NA	NA	NA	NA	NA	NA
	EAFIT-M 2154	Phyllostomus discolor	-	-	NA	NA	NA	NA	NA	NA
	EAFIT-M 2156	Marmosa isthmica	0.375908	0.282213	not assembled	18.2776	not assembled	36.8291	not assembled	27.6602
	EAFIT-M 2155	Marmosa isthmica	0.412817	0.280942	not assembled	55.5884	not assembled	140.531	not assembled	95.7065
	EAFIT-M 2162	Zygodontomys brevicauda	0.043546	0.0305919	8	7.23989	14.15	14.466	9.94161	10.0122

## Sheet: Table S3
	Assembler-Data type	Assembly hit type	Mean number of genes
	Flye-WGS	Coding	4.65
	Rebaler-WGS	Coding	2.52632
	Flye-minimap2	Coding	4.40909
	Rebaler-minimap2	Coding	2.86842
	Flye-mtBlaster	Coding	4.1
	Rebaler-mtBlaster	Coding	2.31579
	Flye-WGS	Non-coding	23.1
	Rebaler-WGS	Non-coding	22.8421
	Flye-minimap2	Non-coding	22.8182
	Rebaler-minimap2	Non-coding	22.8684
	Flye-mtBlaster	Non-coding	21.95
	Rebaler-mtBlaster	Non-coding	22.1579

## Sheet: Table S4
	Assembler-Data type	Error type	Mean number of genes
	Flye-WGS	Incomplete	0.238095
	Rebaler-WGS	Incomplete	0.47619
	Flye-minimap2	Incomplete	0.404762
	Rebaler-minimap2	Incomplete	0.714286
	Flye-mtBlaster	Incomplete	0.904762
	Rebaler-mtBlaster	Incomplete	2.19048
	Flye-WGS	Stop codon	3.78571
	Rebaler-WGS	Stop codon	9.09524
	Flye-minimap2	Stop codon	4.04762
	Rebaler-minimap2	Stop codon	8.59524
	Flye-mtBlaster	Stop codon	3.7381
	Rebaler-mtBlaster	Stop codon	8.90476
	Flye-WGS	Null	0.380952
	Rebaler-WGS	Null	0.952381
	Flye-minimap2	Null	0.666667
	Rebaler-minimap2	Null	0.880952
	Flye-mtBlaster	Null	0.571429
	Rebaler-mtBlaster	Null	0.238095
	Flye-WGS	Non-assembled	19.381
	Rebaler-WGS	Non-assembled	3.52381
	Flye-minimap2	Non-assembled	17.619
	Rebaler-minimap2	Non-assembled	3.52381
	Flye-mtBlaster	Non-assembled	19.381
	Rebaler-mtBlaster	Non-assembled	3.52381

## Sheet: Table S5
	Assembly type	Error type	Mean number of genes
	Draft	Incomplete	0.793651
	Polished	Incomplete	0.849206
	Draft	Stop codon	6.43651
	Polished	Stop codon	6.28571
	Draft	Null	0.650794
	Polished	Null	0.579365
	Draft	Non-assembled	11.1587
	Polished	Non-assembled	11.1587
